# Supplementary material
Source: publisher figshare collection journal article supplement (https://gsapubs.figshare.com/articles/dataset/_/12536327)
Supplement: Supplementary file 1 [file 1]

Bartschi, N.C., Saylor, J.E., Lapen, T.J., Blum, M.D., Pettit, B.S., and Andrea, R.A., 2018, Tectonic controls on Late Cretaceous sediment provenance and stratigraphic architecture in the Book Cliffs, Utah: GSA Bulletin, <https://doi.org/10.1130/B31927.1>.

## **Data Repository**

**Table DR1.** Detrital Zircon U-Pb Samples

**Table DR2.** DZ U-Pb Ages - ACCEPTED

**Table DR3.** DZ U-Pb Ages - REJECTED

**Table DR4.** Provenance Groups

**Table DR5.** Mixture Modeling Results

**SECTION 1:**  
**STRATIGRAPHIC COLUMNS**

## Price Canyon Stratigraphic Column

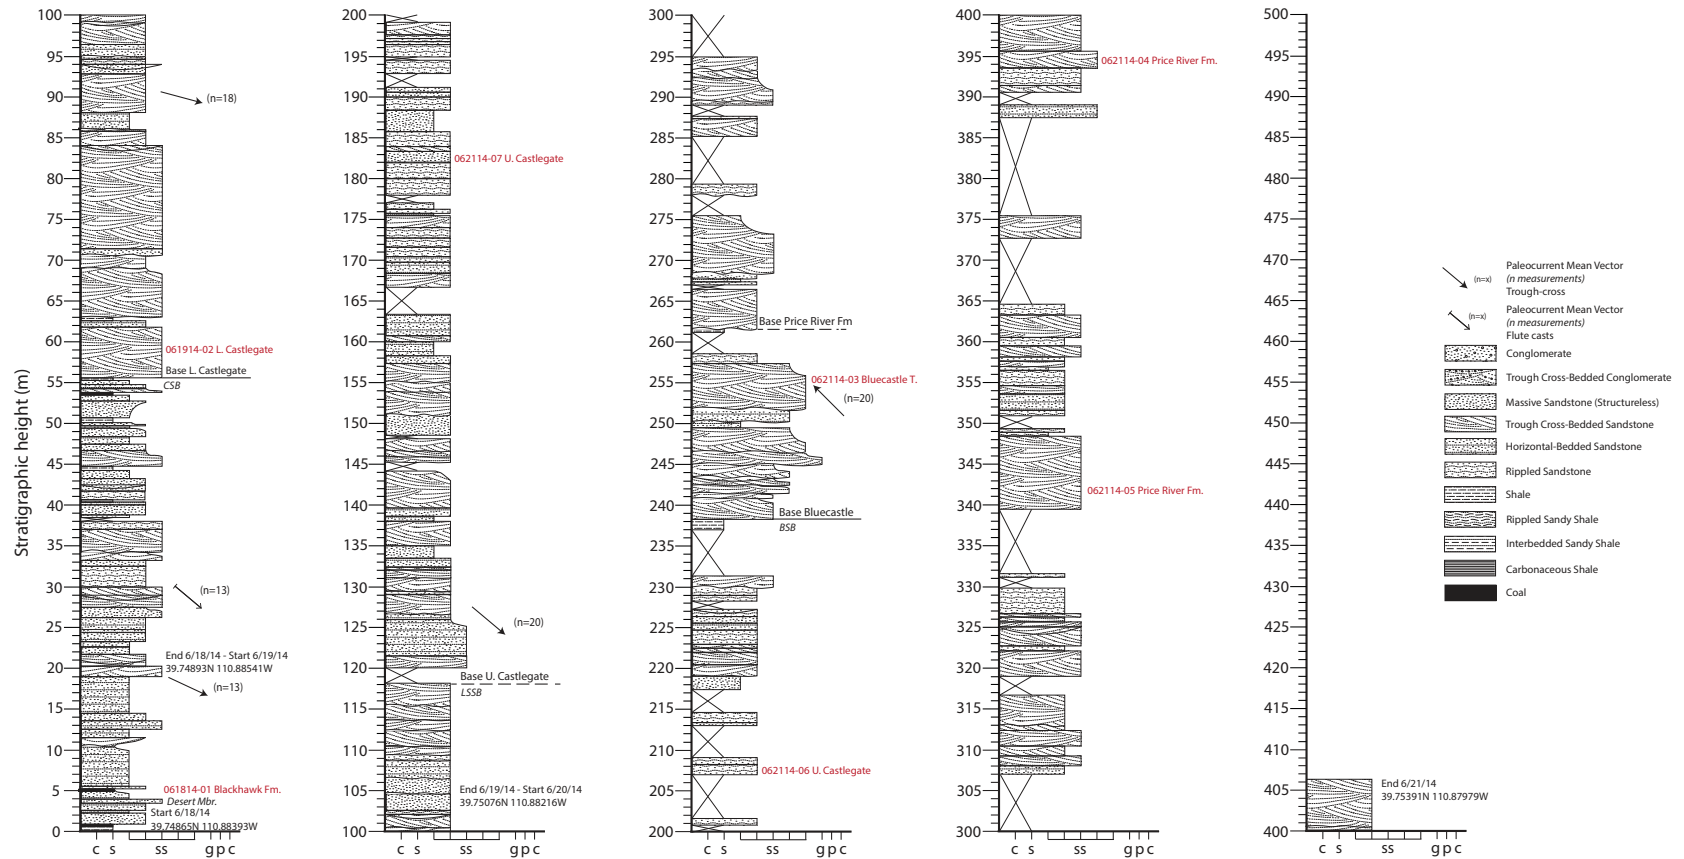

**Figure DR1.** Stratigraphic column of Price Canyon.

## Tuscher Canyon Stratigraphic Column

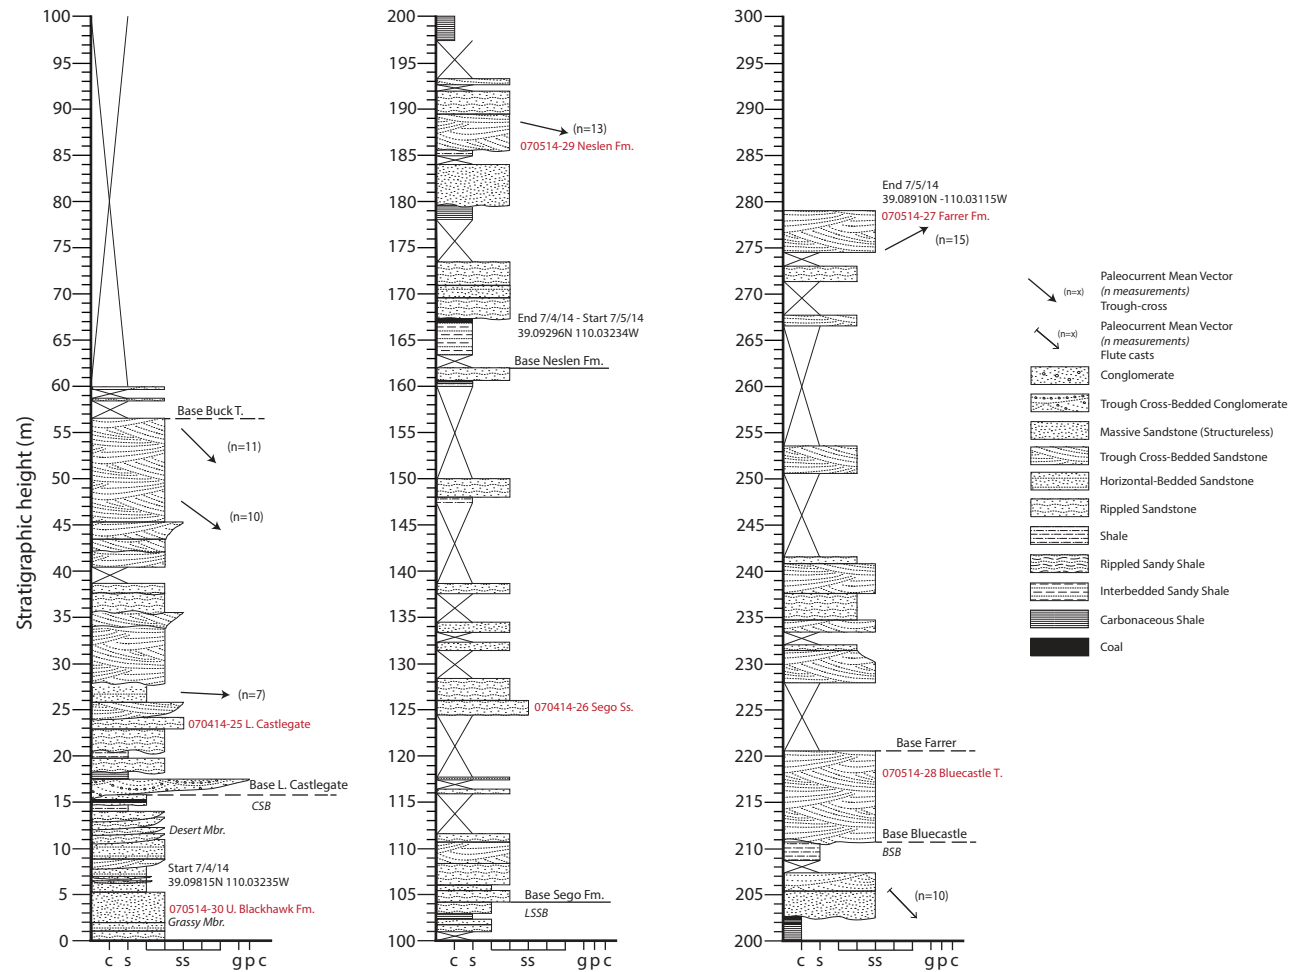

Figure DR2. Stratigraphic column of Tuscher Canyon.

## Thompson Canyon Stratigraphic Column

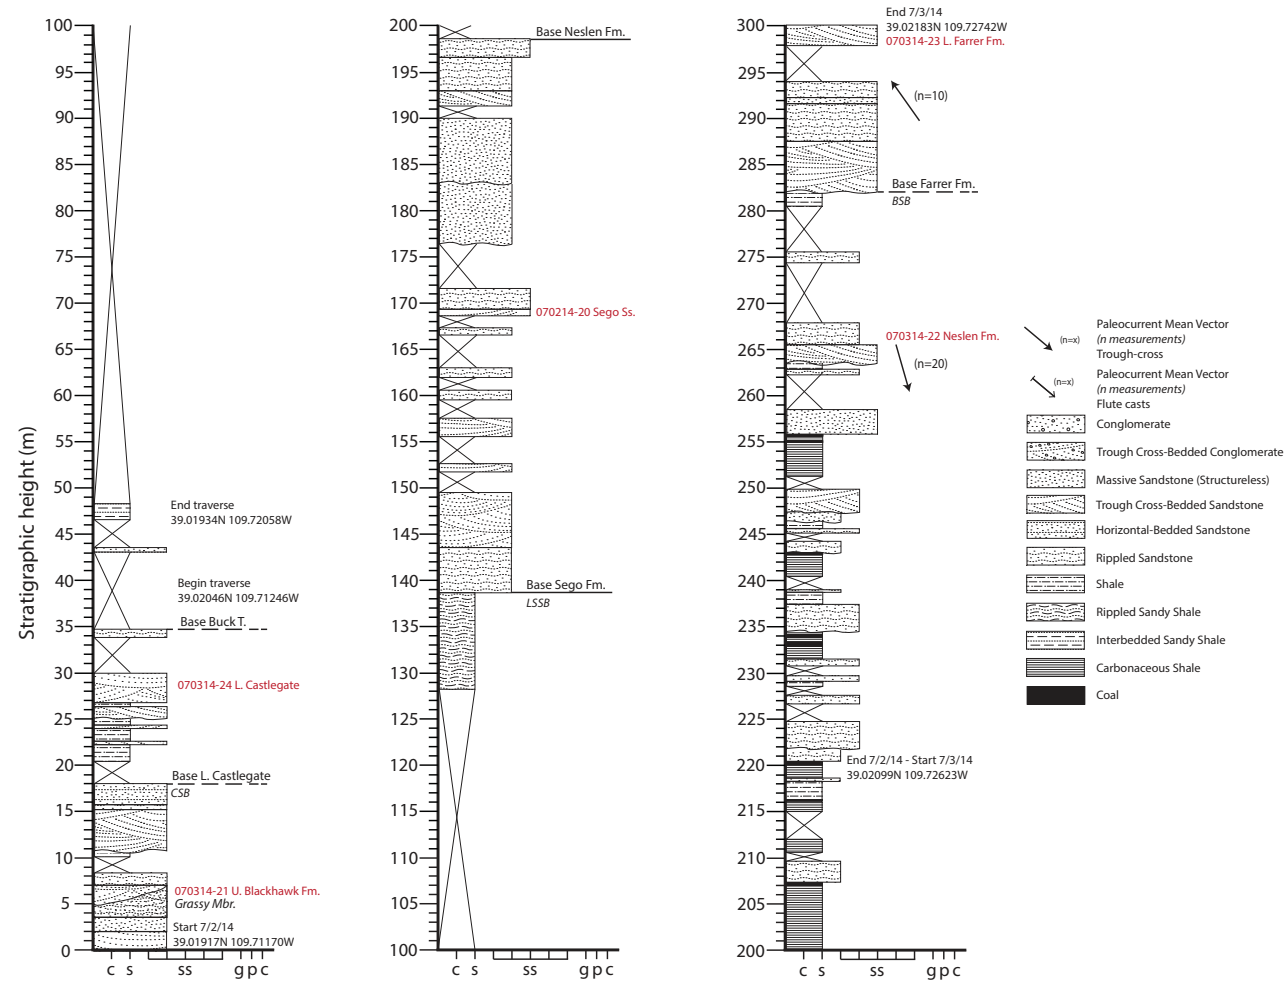

**Figure DR3.** Stratigraphic column of Thompson Canyon.

## Rilda Canyon Stratigraphic Column

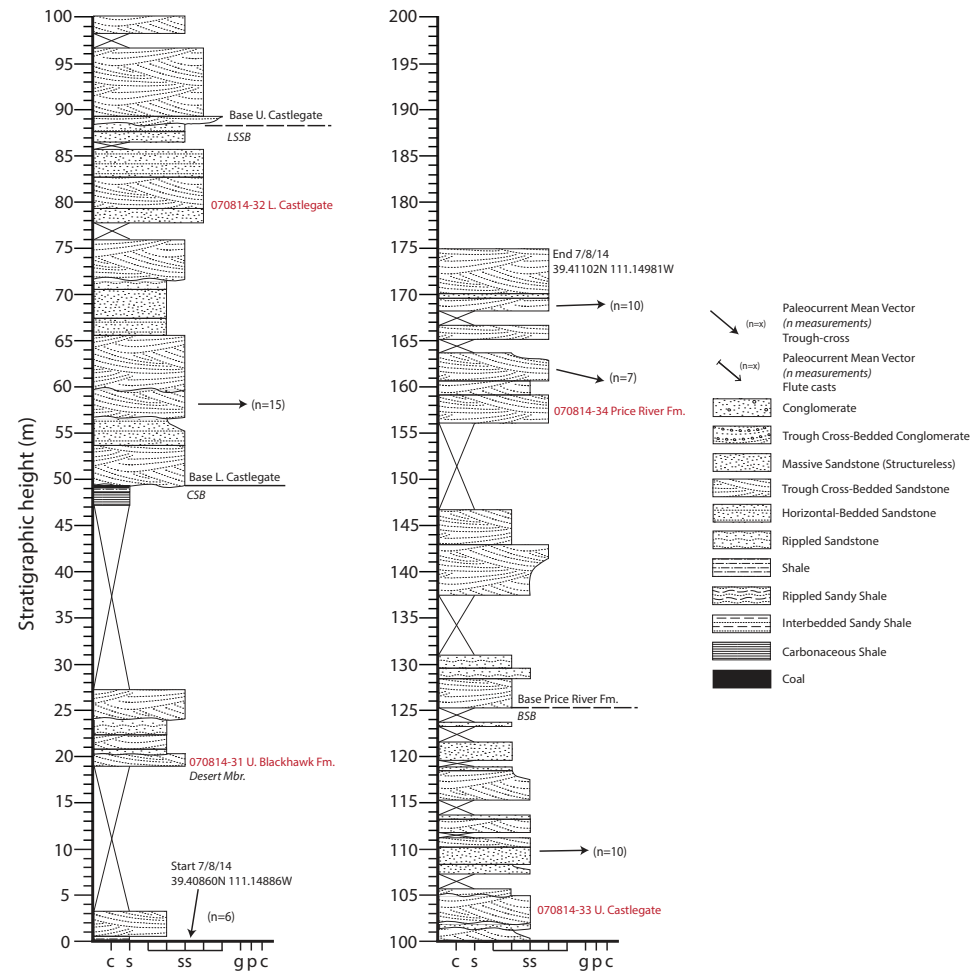

Figure DR4. Stratigraphic column of Rilda Canyon.

## Ferron Canyon Stratigraphic Column

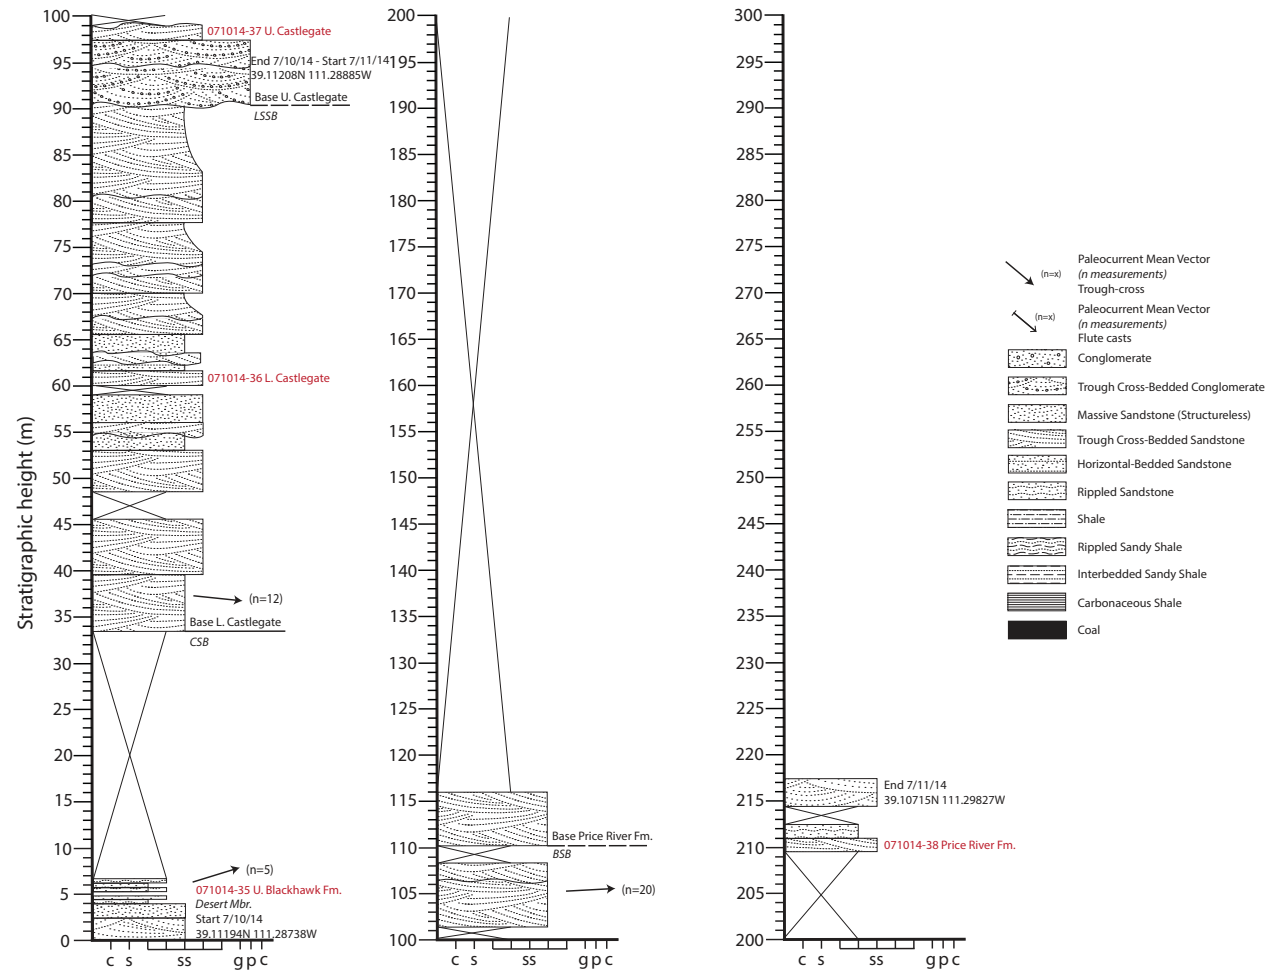

Figure DR5. Stratigraphic column of Ferron Canyon.

**SECTION 2:**  
SUPPLEMENTAL TABLES



Table DR1. Detrital Zircon U-Pb Samples

| Location        | Sample             | Formation       | WGS84    |            |
|-----------------|--------------------|-----------------|----------|------------|
|                 |                    |                 | Latitude | Longitude  |
| Price Canyon    | 062114-05          | Price River Fm. | 39.75326 | -110.88008 |
|                 | 062114-03          | Bluecastle T.   | 39.75214 | -110.88029 |
|                 | 150413-04          | Bluecastle T.   | 39.75196 | -110.88058 |
|                 | 150413-03          | U. Castlegate   | 39.75205 | -110.88130 |
|                 | 062114-07          | U. Castlegate   | 39.75128 | -110.88151 |
|                 | 150413-02          | L. Castlegate   | 39.75066 | -110.88214 |
|                 | 061914-02          | L. Castlegate   | 39.75122 | -110.88399 |
|                 | 150413-01          | Blackhawk Fm.   | 39.74887 | -110.88361 |
|                 | 061814-01          | Blackhawk Fm.   | 39.74881 | -110.88380 |
| Horse Canyon    | 160413-02          | Price River Fm. | 39.47688 | -110.32913 |
|                 | 160413-01          | Price River Fm. | 39.47520 | -110.33013 |
|                 | BC-07 <sup>a</sup> | Bluecastle T.   | 39.47735 | -110.32828 |
|                 | BC-08 <sup>a</sup> | U. Castlegate   | 39.47596 | -110.33566 |
|                 | BC-09 <sup>a</sup> | L. Castlegate   | 39.47075 | -110.34226 |
|                 | BC-10 <sup>a</sup> | Blackhawk Fm.   | 39.47110 | -110.34435 |
|                 | BC-11 <sup>a</sup> | Blackhawk Fm.   | 39.46821 | -110.34554 |
| Tuscher Canyon  | 070514-27          | Farrer Fm.      | 39.08910 | -110.03115 |
|                 | 170413-03          | Farrer Fm.      | 39.08532 | -109.98795 |
|                 | 070514-28          | Bluecastle T.   | 39.09057 | -110.03240 |
|                 | 170413-02          | Neslen Fm.      | 39.08339 | -109.99080 |
|                 | 170413-01          | Neslen Fm.      | 39.08231 | -109.99068 |
|                 | 070514-29          | Neslen Fm.      | 39.09200 | -110.03239 |
|                 | 070414-26          | Sego Ss.        | 39.09375 | -110.03102 |
|                 | 070414-25          | L. Castlegate   | 39.09780 | -110.03191 |
|                 | 070514-30          | Blackhawk Fm.   | 39.09788 | -110.03314 |
| Thompson Canyon | 070314-23          | Farrer Fm.      | 39.02183 | -109.72742 |
|                 | 070314-22          | Neslen Fm.      | 39.02179 | -109.72634 |
|                 | 070214-20          | Sego Ss.        | 39.01818 | -109.72245 |
|                 | 070314-24          | L. Castlegate   | 39.01996 | -109.71201 |
|                 | 070314-21          | Blackhawk Fm.   | 39.01990 | -109.71172 |
| Rilda Canyon    | 070814-34          | Price River Fm. | 39.41083 | -111.14962 |
|                 | 070814-33          | U. Castlegate   | 39.40940 | -111.15028 |
|                 | 070814-32          | L. Castlegate   | 39.40914 | -111.15003 |
|                 | 070814-31          | Blackhawk Fm.   | 39.40913 | -111.14902 |
| Ferron Canyon   | 071114-38          | Price River Fm. | 39.10722 | -111.29817 |
|                 | 071114-37          | U. Castlegate   | 39.11208 | -111.28885 |
|                 | 071114-36          | L. Castlegate   | 39.11211 | -111.28809 |
|                 | 071014-35          | Blackhawk Fm.   | 39.11307 | -111.28731 |

<sup>a</sup> Released by ExxonMobil Upstream Research**Table DR1.** Summary of samples analyzed using detrital zircon U-Pb dating.
