# Supplementary material
Source: publisher figshare collection journal article supplement (https://gsapubs.figshare.com/articles/dataset/_/12536327)
Supplement: Supplementary file 1 [file 1]

## Sheet: DR2. DZ U-Pb Ages - ACCEPTED
Table DR2. Detrital Zircon U-Pb Ages (Accepted)
			Corrected Ratios										Ages (Ma)
Sample	Location	Formation	207Pb/235U	±2σ (%)	206Pb/238U	±2σ (%)	207Pb/206Pb	±2σ (%)	208Pb/232Th	±2σ (%)	rho		207Pb/235U	±2σ	206Pb/238U	±2σ	207Pb/206Pb	±2σ	208Pb/232Th	±2σ	Disc. %1	Best Age2	±2σ
062114-05_226	Price Canyon	Price River Fm.	0.10374	32.3208	0.0113697	12.5727	0.0661999	29.7567	0.00465414	18.4568	0.390356		100.223	30.855	72.8804	9.11143	812.703	622.225	93.8523	17.2894	27.2816	72.8804	9.11143
062114-05_217	Price Canyon	Price River Fm.	0.180352	51.0532	0.0118915	14.2744	0.110024	49.004	0.00486578	25.9398	0.280472		168.363	79.3679	76.2055	10.8138	1799.79	891.803	98.1097	25.4038	54.7375	76.2055	10.8138
062114-05_134	Price Canyon	Price River Fm.	0.0948529	16.9501	0.013145	9.84771	0.0523615	13.7577	0.00427335	13.0183	0.58414		92.014	14.9118	84.1861	8.2365	301.229	313.637	86.19	11.1997	8.50738	84.1861	8.2365
062114-05_195	Price Canyon	Price River Fm.	0.149208	31.1109	0.0132097	14.4205	0.0819423	27.5551	0.00465602	17.6286	0.464248		141.213	41.0368	84.5977	12.1197	1244.14	539.734	93.8901	16.5199	40.092	84.5977	12.1197
062114-05_112	Price Canyon	Price River Fm.	0.101014	18.9145	0.0140758	11.3058	0.0520517	15.1371	0.00475378	13.7806	0.599618		97.7115	17.622	90.1059	10.1163	287.682	345.93	95.8568	13.1827	7.78368	90.1059	10.1163
062114-05_17	Price Canyon	Price River Fm.	0.145922	20.4129	0.0140938	11.9938	0.0751057	16.4343	0.00566083	14.0919	0.593172		138.305	26.3997	90.2199	10.7454	1071.33	330.172	114.095	16.0392	34.7676	90.2199	10.7454
062114-05_300	Price Canyon	Price River Fm.	0.10431	16.9021	0.0144518	10.7075	0.0523929	12.9807	0.00456719	14.7901	0.640492		100.747	16.2122	92.4955	9.83324	302.594	295.851	92.1029	13.5957	8.19048	92.4955	9.83324
062114-05_211	Price Canyon	Price River Fm.	0.106312	13.6542	0.0158546	9.09064	0.0486412	10.1256	0.00519152	9.76427	0.67089		102.586	13.3238	101.403	9.1461	130.572	238.161	104.661	10.1955	1.15314	101.403	9.1461
062114-05_250	Price Canyon	Price River Fm.	0.174044	30.2962	0.0164211	10.7732	0.0769281	28.3033	0.0107782	69.1223	0.356707		162.922	45.6337	104.997	11.2199	1119.33	564.569	216.685	149.529	35.5537	104.997	11.2199
062114-05_275	Price Canyon	Price River Fm.	0.150853	39.8956	0.0170345	11.5616	0.0641654	38.1746	0.0046432	15.5081	0.290546		142.665	53.148	108.887	12.4833	747.088	806.644	93.6321	14.4921	23.6768	108.887	12.4833
062114-05_146	Price Canyon	Price River Fm.	0.182879	13.9491	0.0233774	8.35913	0.0567445	11.1359	0.00781725	13.8196	0.602232		170.535	21.9011	148.966	12.3095	481.618	245.999	157.39	21.6778	12.648	148.966	12.3095
062114-05_210	Price Canyon	Price River Fm.	0.174805	29.7815	0.0239009	11.61	0.053045	27.4028	0.00734099	13.9857	0.391619		163.58	45.0244	152.263	17.4706	330.722	621.539	147.836	20.611	6.91842	152.263	17.4706
062114-05_110	Price Canyon	Price River Fm.	0.200136	54.8256	0.0244838	13.0793	0.0592931	53.2346	0.00748044	25.8916	0.239157		185.241	93.0941	155.932	20.1502	577.874	1156.76	150.634	38.8939	15.8223	155.932	20.1502
062114-05_264	Price Canyon	Price River Fm.	0.186965	15.4351	0.0247079	8.7666	0.0548783	12.674	0.00870357	12.8504	0.57077		174.037	24.6915	157.342	13.6266	407.27	283.575	175.157	22.4236	9.59273	157.342	13.6266
062114-05_161	Price Canyon	Price River Fm.	0.212613	22.193	0.0249292	11.0599	0.0618118	19.2173	0.00888871	16.9491	0.500192		195.743	39.5306	158.733	17.3414	667.605	411.367	178.867	30.2051	18.9072	158.733	17.3414
062114-05_100	Price Canyon	Price River Fm.	0.175026	18.9043	0.0252801	11.8074	0.0502179	14.7531	0.00870906	13.9472	0.625269		163.771	28.5996	160.94	18.7677	205.091	342.279	175.267	24.3538	1.72849	160.94	18.7677
062114-05_81	Price Canyon	Price River Fm.	0.17372	14.124	0.0256347	8.13172	0.0491346	11.4938	0.00757879	12.6753	0.581201		162.642	21.2293	163.169	13.102	154.257	269.163	152.607	19.2797	-0.324062	163.169	13.102
062114-05_22	Price Canyon	Price River Fm.	0.234776	22.0774	0.0260174	12.7153	0.0654477	18.035	0.0121347	18.742	0.576782		214.134	42.6481	165.574	20.7853	788.762	378.553	243.793	45.4682	22.6773	165.574	20.7853
062114-05_239	Price Canyon	Price River Fm.	0.199247	16.4774	0.0267526	8.86341	0.0540447	13.8655	0.0083391	12.2576	0.540285		184.489	27.8043	170.192	14.8875	372.913	312.13	167.853	20.4999	7.74953	170.192	14.8875
062114-05_187	Price Canyon	Price River Fm.	0.222605	25.7634	0.0293499	12.9047	0.0549761	22.2874	0.00908708	13.699	0.501635		204.076	47.6652	186.478	23.7199	411.252	498.323	182.841	24.9498	8.62284	186.478	23.7199
062114-05_227	Price Canyon	Price River Fm.	0.253176	13.7653	0.03236	9.15786	0.0567654	10.2241	0.00831848	10.7673	0.669588		229.153	28.2448	205.302	18.5051	482.43	225.826	167.44	17.9622	10.4083	205.302	18.5051
062114-05_27	Price Canyon	Price River Fm.	0.244205	19.3337	0.0338854	13.6745	0.0522753	13.6965	0.0103868	14.5906	0.705783		221.858	38.5492	214.82	28.8917	297.471	312.455	208.857	30.3394	3.17236	214.82	28.8917
062114-05_137	Price Canyon	Price River Fm.	0.250173	13.0311	0.0347887	8.98356	0.0521881	9.38214	0.0109915	11.4055	0.694009		226.717	26.4838	220.45	19.4695	293.66	214.179	220.95	25.0788	2.76422	220.45	19.4695
062114-05_247	Price Canyon	Price River Fm.	0.286557	13.9121	0.0363423	7.89278	0.0572373	11.427	0.00486644	292.162	0.570395		255.846	31.4733	230.121	17.8426	500.688	251.599	98.1231	98.1231	10.055	230.121	17.8426
062114-05_121	Price Canyon	Price River Fm.	0.474243	12.3665	0.0480036	8.63043	0.0716486	8.84009	0.0123213	9.82196	0.69929		394.116	40.4147	302.253	25.4838	975.975	180.231	247.519	24.1774	23.3086	302.253	25.4838
062114-05_170	Price Canyon	Price River Fm.	0.371675	13.1285	0.0524381	8.71522	0.0513571	9.77062	0.0159671	10.3533	0.667939		320.894	36.1362	329.473	27.993	256.891	224.542	320.182	32.9151	-2.67334	329.473	27.993
062114-05_116	Price Canyon	Price River Fm.	0.499007	13.0938	0.0529146	8.98708	0.0683953	9.48973	0.0312258	10.6418	0.689018		411.03	44.2868	332.391	29.1154	880.555	196.345	621.49	65.2364	19.1323	332.391	29.1154
062114-05_156	Price Canyon	Price River Fm.	0.521555	15.0432	0.0560722	10.3462	0.067429	10.9272	0.0171246	11.5363	0.687281		426.19	52.4044	351.694	35.4126	851.053	227.124	343.196	39.296	17.4794	351.694	35.4126
062114-05_241	Price Canyon	Price River Fm.	0.466446	21.6335	0.0584337	11.7349	0.0579476	18.1593	0.0216385	14.9838	0.54351		388.731	69.981	366.093	41.7643	527.783	397.97	432.697	64.2474	5.82368	366.093	41.7643
062114-05_243	Price Canyon	Price River Fm.	0.580344	17.434	0.0637649	10.6426	0.0660711	13.7883	0.0258977	12.0241	0.611961		464.683	65.096	398.481	41.1253	808.629	288.506	516.787	61.4446	14.2466	398.481	41.1253
062114-05_163	Price Canyon	Price River Fm.	0.499904	13.2949	0.0647388	8.31825	0.0559596	10.324	0.0198651	9.71236	0.630081		411.637	45.0216	404.38	32.6043	450.767	229.238	397.581	38.2734	1.76287	404.38	32.6043
062114-05_194	Price Canyon	Price River Fm.	0.532706	13.2671	0.0648036	8.90587	0.0596352	9.80216	0.0204843	10.0139	0.673892		433.604	46.8534	404.773	34.9404	590.363	212.547	409.85	40.6694	6.64911	404.773	34.9404
062114-05_198	Price Canyon	Price River Fm.	0.514134	15.5971	0.065343	9.2595	0.0570688	12.5196	0.0205253	10.2254	0.596401		421.225	53.8259	408.038	36.6117	494.193	275.965	410.662	41.6111	3.13078	408.038	36.6117
062114-05_224	Price Canyon	Price River Fm.	0.539464	13.4793	0.0665913	8.93232	0.0587747	10.0383	0.0210162	13.5472	0.66739		438.071	47.9968	415.586	35.9506	558.761	218.835	420.382	56.4406	5.13265	415.586	35.9506
062114-05_286	Price Canyon	Price River Fm.	0.574176	14.0118	0.0677902	9.95153	0.0614742	9.822	0.0234888	8.42588	0.713187		460.711	51.9391	422.829	40.7282	655.867	210.659	469.272	39.1226	8.2227	422.829	40.7282
062114-05_05	Price Canyon	Price River Fm.	0.553427	16.6861	0.0686731	11.2764	0.0584671	12.1282	0.0217093	14.3423	0.686891		447.239	60.432	428.156	46.7132	547.311	264.911	434.097	61.6896	4.26674	428.156	46.7132
062114-05_16	Price Canyon	Price River Fm.	0.612806	14.7364	0.0695851	10.4906	0.0638881	10.1879	0.0206023	10.386	0.722606		485.328	56.9136	433.656	43.9974	737.927	215.593	412.187	42.4206	10.6469	433.656	43.9974
062114-05_153	Price Canyon	Price River Fm.	0.614408	15.3595	0.0696691	8.91948	0.063929	12.517	0.0214661	9.25972	0.579555		486.337	59.4219	434.162	37.4502	739.283	264.822	429.286	39.3698	10.7281	434.162	37.4502
062114-05_88	Price Canyon	Price River Fm.	0.573477	12.4958	0.0712783	8.50056	0.0583486	9.11	0.0208269	9.69701	0.684477		460.261	46.2753	443.853	36.4607	542.875	199.136	416.635	40.0272	3.56502	443.853	36.4607
062114-05_204	Price Canyon	Price River Fm.	0.712068	20.1087	0.0717121	12.1814	0.0719889	15.965	0.0256597	14.1022	0.608009		545.974	85.1199	446.462	52.5457	985.628	324.945	512.098	71.4361	18.2265	446.462	52.5457
062114-05_265	Price Canyon	Price River Fm.	1.24173	39.7384	0.0719425	9.35251	0.125185	38.6126	0.0294712	16.5063	0.23634		819.668	227.222	447.848	40.4637	2031.41	683.518	587.07	95.7364	45.3623	447.848	40.4637
062114-05_92	Price Canyon	Price River Fm.	0.717984	21.5706	0.0786425	12.9835	0.0662251	17.2186	0.0223691	11.8391	0.602334		549.476	91.7844	488.015	61.0244	813.5	360.004	447.147	52.425	11.1854	488.015	61.0244
062114-05_208	Price Canyon	Price River Fm.	0.716998	17.5837	0.0801656	12.7744	0.0648607	12.0336	0.0203365	23.2805	0.72915		548.893	74.6915	497.111	61.1179	769.822	253.348	406.923	94.0046	9.43387	497.111	61.1179
062114-05_252	Price Canyon	Price River Fm.	1.01466	16.5022	0.0804013	10.0669	0.091557	13.0446	0.0251889	17.6557	0.612494		711.223	84.5848	498.518	48.2947	1458.21	248.024	502.818	87.8713	29.907	498.518	48.2947
062114-05_278	Price Canyon	Price River Fm.	0.887495	16.7546	0.0810436	12.2155	0.0793794	11.4334	0.0120056	18.6668	0.730979		645.023	80.1579	502.349	59.0361	1181.61	225.985	241.214	44.8089	22.1192	502.349	59.0361
062114-05_287	Price Canyon	Price River Fm.	0.877656	13.8527	0.0824684	10.5444	0.0772233	8.94081	0.0307595	10.4214	0.763834		639.716	65.8388	510.839	51.7871	1126.96	178.142	612.348	62.9564	20.1459	510.839	51.7871
062114-05_222	Price Canyon	Price River Fm.	0.975448	25.1033	0.0871695	10.1616	0.081182	22.9289	0.0384552	52.2312	0.407103		691.268	126.514	538.776	52.5237	1225.85	450.301	762.692	394.771	22.0598	538.776	52.5237
062114-05_151	Price Canyon	Price River Fm.	0.821319	15.9758	0.0874665	10.7758	0.0680732	11.8004	0.0278148	12.0552	0.674099		608.784	73.2776	540.536	55.8732	870.782	244.522	554.523	66.0478	11.2105	540.536	55.8732
062114-05_234	Price Canyon	Price River Fm.	1.09997	13.2918	0.0889541	9.19688	0.089727	9.5528	0.0395687	13.9558	0.69533		753.334	70.8082	549.348	48.431	1419.73	182.583	784.354	107.652	27.0777	549.348	48.431
062114-05_135	Price Canyon	Price River Fm.	0.840772	16.8825	0.0906854	12.3378	0.0672793	11.4774	0.0332576	15.6235	0.733367		619.572	78.4527	559.59	66.1315	846.431	238.73	661.274	101.899	9.68124	559.59	66.1315
062114-05_108	Price Canyon	Price River Fm.	0.871745	16.8984	0.101191	10.8739	0.0624857	12.9042	0.0318257	11.6809	0.645656		636.514	80.0788	621.388	64.417	690.774	275.177	633.244	72.9532	10.0448	621.388	64.417
062114-05_138	Price Canyon	Price River Fm.	1.25211	13.2688	0.133056	8.74473	0.0682947	9.92524	0.0413079	16.9401	0.6637		824.358	75.042	805.277	66.2008	877.511	205.452	818.141	136.285	8.23179	805.277	66.2008
062114-05_144	Price Canyon	Price River Fm.	1.49832	14.2489	0.148426	10.0275	0.0732343	10.0828	0.0493268	13.2179	0.706597		929.703	86.9816	892.137	83.5496	1020.44	204.17	973.196	125.98	12.5737	892.137	83.5496
062114-05_295	Price Canyon	Price River Fm.	1.58891	19.4362	0.154501	13.0774	0.0747149	14.3236	0.0525225	21.3791	0.675952		965.87	121.702	926.142	112.829	1060.84	288.22	1034.66	216.793	12.6975	926.142	112.829
062114-05_298	Price Canyon	Price River Fm.	1.53325	17.0986	0.155693	11.9615	0.0715579	12.0919	0.0517271	15.5597	0.707067		943.803	105.459	932.799	103.889	973.394	246.623	1019.38	155.274	4.17055	932.799	103.889
062114-05_73	Price Canyon	Price River Fm.	1.74534	13.2211	0.163321	8.89122	0.0774958	9.73524	0.0508235	12.06	0.676622		1025.44	85.5475	975.206	80.472	1133.98	193.77	1002	118.24	14.0012	975.206	80.472
062114-05_242	Price Canyon	Price River Fm.	1.6602	16.5259	0.163576	11.571	0.0736791	11.7756	0.054123	18.6706	0.701616		993.452	105.096	976.618	104.87	1032.69	237.959	1065.37	194.694	5.42969	976.618	104.87
062114-05_159	Price Canyon	Price River Fm.	1.71344	12.4798	0.165135	8.77082	0.0752178	8.86253	0.0526656	15.9186	0.704052		1013.57	80.1841	985.248	80.1388	1074.33	177.972	1037.41	161.619	8.29162	985.248	80.1388
062114-05_07	Price Canyon	Price River Fm.	1.76048	13.2054	0.16589	8.96054	0.0770001	9.46497	0.0575404	10.9509	0.697588		1031.03	85.715	989.427	82.1938	1121.19	188.747	1130.79	120.792	11.7523	989.427	82.1938
062114-05_139	Price Canyon	Price River Fm.	1.68064	13.8181	0.167734	9.62116	0.0727175	9.86396	0.0474689	11.8095	0.700316		1001.22	88.1869	999.612	89.0943	1006.09	200.16	937.377	108.462	0.643835	999.612	89.0943
062114-05_228	Price Canyon	Price River Fm.	1.74491	11.6362	0.168966	8.08437	0.074929	8.30541	0.0581677	27.7895	0.700416		1025.28	75.2453	1006.41	75.3324	1066.6	166.978	1142.78	311.143	5.64269	1006.41	75.3324
062114-05_216	Price Canyon	Price River Fm.	1.7619	12.9888	0.168977	9.23568	0.0756412	9.06283	0.0550205	16.0764	0.716371		1031.55	84.3278	1006.47	86.0665	1085.59	181.688	1082.57	170.174	7.28811	1006.47	86.0665
062114-05_270	Price Canyon	Price River Fm.	1.69015	11.6768	0.16913	8.09297	0.0724529	8.37568	0.0462424	10.6458	0.696782		1004.82	74.6249	1007.32	75.4751	998.69	170.145	913.695	95.3291	-0.863667	1007.32	75.4751
062114-05_140	Price Canyon	Price River Fm.	1.75016	14.7104	0.172386	10.3137	0.073682	10.4382	0.0535838	11.7956	0.704632		1027.22	95.3338	1025.24	97.7679	1032.77	210.931	1055.03	121.62	0.728888	1025.24	97.7679
062114-05_183	Price Canyon	Price River Fm.	1.84171	12.5927	0.173004	8.28509	0.0771696	9.44308	0.0503524	10.0186	0.661578		1060.47	83.0533	1028.64	78.7759	1125.58	188.188	992.94	97.3087	8.61209	1028.64	78.7759
062114-05_10	Price Canyon	Price River Fm.	1.80253	13.6753	0.173758	9.67779	0.0752816	9.40287	0.0562726	10.9915	0.726346		1046.38	89.5409	1032.78	92.3613	1076.03	188.775	1106.54	118.705	4.01903	1032.78	92.3613
062114-05_06	Price Canyon	Price River Fm.	1.79425	12.9614	0.175056	9.33553	0.0743649	8.74556	0.0501827	10.6552	0.738278		1043.37	84.7045	1039.91	89.6608	1051.39	176.23	989.674	103.174	1.09208	1039.91	89.6608
062114-05_72	Price Canyon	Price River Fm.	1.81347	11.2248	0.17591	7.87329	0.0747629	7.9423	0.0539978	9.14771	0.706668		1050.33	73.5932	1044.59	75.9294	1062.14	159.785	1062.97	94.9473	1.65198	1044.59	75.9294
062114-05_290	Price Canyon	Price River Fm.	1.95443	15.3793	0.175977	10.866	0.0805413	10.8545	0.0573447	9.58391	0.708429		1099.97	103.662	1044.96	104.83	1210.27	213.651	1127.05	105.333	13.6594	1044.96	104.83
062114-05_158	Price Canyon	Price River Fm.	1.90395	12.8668	0.176089	9.1062	0.0783822	9.08339	0.0485434	9.46003	0.708257		1082.47	85.8619	1045.57	87.897	1156.58	180.195	958.1	88.7164	9.59758	1045.57	87.897
062114-05_08	Price Canyon	Price River Fm.	1.97451	15.2325	0.176187	10.5581	0.0813201	10.7625	0.0547096	13.9096	0.707821		1106.85	103.022	1046.11	101.962	1229.19	211.262	1076.61	146.363	14.8945	1046.11	101.962
062114-05_114	Price Canyon	Price River Fm.	1.783	17.9776	0.178432	12.5291	0.0724745	12.8644	0.0607315	15.2549	0.698531		1039.27	117.471	1058.41	122.309	999.295	261.308	1191.69	177.312	-5.91524	1058.41	122.309
062114-05_296	Price Canyon	Price River Fm.	1.87484	18.8675	0.179877	13.3889	0.0757466	13.2137	0.0582949	13.5056	0.71382		1072.24	125.575	1066.3	131.602	1088.38	264.792	1145.21	150.929	2.02855	1066.3	131.602
062114-05_78	Price Canyon	Price River Fm.	1.91841	11.244	0.18247	8.01973	0.0762252	7.80684	0.0589159	10.5223	0.719703		1087.51	75.1862	1080.46	79.7815	1100.99	156.149	1157.06	118.678	1.86513	1080.46	79.7815
062114-05_150	Price Canyon	Price River Fm.	2.12733	13.3236	0.183957	9.34287	0.0838521	9.48519	0.0643015	12.765	0.70227		1157.72	92.2794	1088.55	93.5855	1289.12	184.604	1259.6	156.485	15.5586	1088.55	93.5855
062114-05_142	Price Canyon	Price River Fm.	1.97205	12.4572	0.186175	8.46784	0.0768564	9.08651	0.0524525	9.97431	0.684079		1106.01	84.1208	1100.62	85.6818	1117.47	181.3	1033.31	100.726	1.50749	1100.62	85.6818
062114-05_236	Price Canyon	Price River Fm.	2.05214	12.682	0.191763	8.66563	0.0776527	9.2171	0.0589696	9.55781	0.686874		1133.01	86.7913	1130.92	89.892	1138	183.348	1158.09	107.864	0.622489	1130.92	89.892
062114-05_80	Price Canyon	Price River Fm.	2.34688	13.6538	0.194747	10.1668	0.0873683	9.04526	0.085097	11.1868	0.749102		1226.61	97.5142	1147.04	106.841	1368.63	174.097	1650.72	178.105	16.1906	1147.04	106.841
062114-05_182	Price Canyon	Price River Fm.	2.26484	12.8143	0.196915	8.3488	0.0833794	9.67909	0.0534156	10.2612	0.655348		1201.41	90.4998	1158.73	88.5494	1278.11	188.672	1051.8	105.442	9.34076	1158.73	88.5494
062114-05_29	Price Canyon	Price River Fm.	2.16877	20.8108	0.20046	14.5618	0.0784807	14.8935	0.0503194	14.0593	0.698451		1171.09	145.615	1177.79	156.782	1159.07	295.346	992.306	136.603	-1.61503	1177.79	156.782
062114-05_200	Price Canyon	Price River Fm.	2.27002	14.4515	0.207539	9.87528	0.0793189	10.5104	0.0753444	11.4623	0.686338		1203.02	102.208	1215.69	109.423	1180.1	207.787	1468.24	162.982	-3.01574	1180.1	207.787
062114-05_123	Price Canyon	Price River Fm.	2.25489	15.7024	0.201101	10.5612	0.0813204	11.6061	0.0495969	15.7567	0.673568		1198.31	110.894	1181.23	114.002	1229.2	227.821	978.397	151.054	3.90229	1181.23	114.002
062114-05_136	Price Canyon	Price River Fm.	2.14196	12.8754	0.202369	9.03948	0.076811	9.10979	0.0614033	10.557	0.706696		1162.46	89.3556	1188.03	98.0848	1116.29	181.796	1204.49	123.821	-6.42732	1188.03	98.0848
062114-05_240	Price Canyon	Price River Fm.	2.44765	11.315	0.221659	7.57456	0.0801304	8.36587	0.0693723	8.87521	0.673317		1256.73	81.742	1290.63	88.6009	1200.2	164.908	1355.67	116.709	-7.53498	1200.2	164.908
062114-05_299	Price Canyon	Price River Fm.	2.45881	16.9147	0.220654	11.5142	0.0809308	12.2669	0.0688661	15.3066	0.688562		1260.01	122.687	1285.33	134.195	1219.77	241.12	1346.1	200.32	-5.37524	1219.77	241.12
062114-05_218	Price Canyon	Price River Fm.	2.44268	14.8997	0.208098	10.5564	0.0851529	10.4544	0.0575844	21.86	0.712532		1255.27	107.746	1218.68	117.233	1319.02	202.612	1131.63	242.021	7.60774	1319.02	202.612
062114-05_176	Price Canyon	Price River Fm.	2.96962	12.3802	0.247608	8.49005	0.0869525	8.95543	0.0740071	11.0671	0.69048		1399.88	94.3096	1426.13	108.632	1359.44	172.587	1443.08	154.731	-4.90551	1359.44	172.587
062114-05_149	Price Canyon	Price River Fm.	3.01085	20.3953	0.247104	14.2289	0.0883585	14.5979	0.0687579	11.7032	0.698359		1410.37	156.69	1423.52	181.795	1390.29	280.133	1344.06	152.757	-2.39037	1390.29	280.133
062114-05_207	Price Canyon	Price River Fm.	2.92328	13.7173	0.233108	9.80385	0.0909325	9.53344	0.0765763	10.6922	0.719029		1387.95	104.145	1350.77	119.487	1445.19	181.587	1491.38	154.308	6.5334	1445.19	181.587
062114-05_21	Price Canyon	Price River Fm.	3.16856	21.0516	0.252551	14.7857	0.0909953	14.9611	0.0731396	12.622	0.703508		1449.53	163.885	1451.62	192.24	1446.5	284.918	1426.75	174.628	-0.353449	1446.5	284.918
062114-05_76	Price Canyon	Price River Fm.	3.31795	10.7234	0.258347	7.44444	0.0931181	7.64603	0.0708965	8.26208	0.701174		1485.28	83.8571	1481.38	98.5344	1490.29	144.758	1384.46	110.859	0.597773	1490.29	144.758
062114-05_180	Price Canyon	Price River Fm.	3.07963	12.2162	0.236461	8.28696	0.0944396	8.91641	0.0699977	10.4684	0.68359		1427.64	93.903	1368.27	102.171	1516.92	168.217	1367.49	138.896	9.79944	1516.92	168.217
062114-05_04	Price Canyon	Price River Fm.	3.39088	17.1705	0.256977	11.663	0.0957239	12.4483	0.0817322	13.9859	0.688834		1502.29	135.438	1474.36	153.737	1542.36	234.068	1587.95	214.725	4.40893	1542.36	234.068
062114-05_02	Price Canyon	Price River Fm.	3.20042	15.4626	0.241299	10.0576	0.0961989	11.6288	0.0940088	14.3169	0.659148		1457.26	120.184	1393.45	126.051	1551.66	218.394	1816.04	250.205	10.1964	1551.66	218.394
062114-05_70	Price Canyon	Price River Fm.	4.06384	19.6223	0.30342	14.3434	0.0971992	13.3472	0.0868344	13.9503	0.733023		1647.08	161.237	1708.25	215.323	1571.06	250.034	1683.06	226.547	-8.73214	1571.06	250.034
062114-05_141	Price Canyon	Price River Fm.	4.13872	16.7571	0.305794	12.0685	0.0982078	11.5846	0.0879609	11.7046	0.722548		1661.98	137.879	1719.98	182.239	1590.37	216.474	1704	192.181	-8.1495	1590.37	216.474
062114-05_85	Price Canyon	Price River Fm.	4.02944	18.3478	0.294806	12.8383	0.0991138	13.0665	0.0816343	16.1705	0.702022		1640.16	150.348	1665.5	188.486	1607.51	243.628	1586.12	248.195	-3.60777	1607.51	243.628
062114-05_293	Price Canyon	Price River Fm.	3.08574	13.7026	0.225592	9.72999	0.0992883	9.6005	0.0789834	11.017	0.713528		1429.16	105.458	1311.36	115.466	1610.79	178.928	1536.52	163.666	18.589	1610.79	178.928
062114-05_69	Price Canyon	Price River Fm.	4.106	21.363	0.299221	15.3007	0.0995858	14.8666	0.0815234	14.9194	0.71814		1655.5	176.181	1687.45	227.258	1616.36	276.875	1584.04	228.595	-4.39797	1616.36	276.875
062114-05_238	Price Canyon	Price River Fm.	3.6634	12.0595	0.26596	8.56328	0.099952	8.44932	0.0774842	9.21249	0.71353		1563.43	96.4821	1520.26	115.985	1623.19	157.223	1508.42	134.35	6.34121	1623.19	157.223
062114-05_203	Price Canyon	Price River Fm.	4.16316	12.2563	0.301799	8.46683	0.100005	8.8016	0.0878092	10.4693	0.695928		1666.8	100.674	1700.22	126.552	1624.17	163.758	1701.18	171.538	-4.68264	1624.17	163.758
062114-05_44	Price Canyon	Price River Fm.	4.19628	22.0604	0.301497	16.1947	0.100864	14.9737	0.0712933	20.6728	0.734362		1673.29	182.842	1698.73	241.955	1640.06	278.029	1391.95	280.001	-3.57717	1640.06	278.029
062114-05_19	Price Canyon	Price River Fm.	4.20175	19.0992	0.301445	13.9569	0.101106	12.9468	0.0794157	11.1066	0.735194		1674.36	157.909	1698.47	208.469	1644.52	240.192	1544.62	165.842	-3.2804	1644.52	240.192
062114-05_131	Price Canyon	Price River Fm.	4.44531	11.9303	0.318106	8.1372	0.101388	8.66847	0.0873924	11.5922	0.687085		1720.82	99.2061	1780.47	126.611	1649.68	160.714	1693.43	189.19	-7.92854	1649.68	160.714
062114-05_197	Price Canyon	Price River Fm.	4.46404	10.5766	0.316299	7.42832	0.102372	7.47838	0.0924146	9.36913	0.70716		1724.31	87.9576	1771.63	115.08	1667.57	138.337	1786.57	160.84	-6.24055	1667.57	138.337
062114-05_20	Price Canyon	Price River Fm.	3.83061	21.8933	0.271264	16.1751	0.102428	14.684	0.0719166	14.5528	0.741726		1599.2	178.085	1547.21	222.584	1668.58	271.594	1403.7	198.317	7.27385	1668.58	271.594
062114-05_185	Price Canyon	Price River Fm.	3.61177	14.8415	0.252529	10.9542	0.103672	9.98173	0.0796548	12.6728	0.740049		1552.13	118.557	1451.5	142.394	1690.88	184.104	1549.09	189.868	14.1569	1690.88	184.104
062114-05_165	Price Canyon	Price River Fm.	4.17511	13.2896	0.290846	9.15688	0.104022	9.57933	0.0894909	17.4554	0.693143		1669.15	109.286	1645.76	133.02	1697.09	176.545	1732.4	291.899	3.02471	1697.09	176.545
062114-05_166	Price Canyon	Price River Fm.	3.8212	12.9481	0.266183	8.27618	0.104022	9.9072	0.0798145	10.6817	0.643869		1597.22	104.571	1521.4	112.17	1697.09	182.588	1552.08	160.216	10.3527	1697.09	182.588
062114-05_133	Price Canyon	Price River Fm.	4.26726	11.9742	0.296716	8.52617	0.104354	8.34567	0.0889345	9.9677	0.717116		1687.07	98.8116	1675	125.783	1702.96	153.696	1722.07	165.216	1.64196	1702.96	153.696
062114-05_249	Price Canyon	Price River Fm.	4.22812	11.0247	0.293832	7.75435	0.104447	7.7913	0.0945567	8.30424	0.707511		1679.5	90.7721	1660.65	113.535	1704.6	143.458	1826.16	145.523	2.57811	1704.6	143.458
062114-05_89	Price Canyon	Price River Fm.	3.6879	14.3574	0.25588	10.9728	0.10453	9.21908	0.0808494	11.3513	0.766613		1568.75	115.176	1468.73	144.144	1706.07	169.715	1571.45	172.355	13.9113	1706.07	169.715
062114-05_127	Price Canyon	Price River Fm.	4.16085	12.4435	0.288316	8.82239	0.104671	8.7462	0.0294918	29.0597	0.711322		1666.35	102.211	1633.11	127.294	1708.54	160.961	587.475	168.965	4.41482	1708.54	160.961
062114-05_221	Price Canyon	Price River Fm.	4.24725	13.8143	0.294111	8.97951	0.104762	10.4403	0.0855109	9.68966	0.654864		1683.21	114.013	1662.04	131.574	1710.14	192.1	1658.43	154.872	2.81294	1710.14	192.1
062114-05_179	Price Canyon	Price River Fm.	3.42845	14.3005	0.237197	11.0036	0.10481	9.07565	0.0194157	38.0825	0.772815		1510.94	112.878	1372.11	136.015	1710.98	166.973	388.674	147.137	19.8057	1710.98	166.973
062114-05_143	Price Canyon	Price River Fm.	3.73463	13.4574	0.256071	9.30477	0.105814	9.67745	0.0786887	10.5112	0.694896		1578.82	108.191	1469.71	122.299	1728.49	177.658	1531	155.58	14.9718	1728.49	177.658
062114-05_167	Price Canyon	Price River Fm.	4.17654	12.6574	0.285986	8.54433	0.10582	9.28467	0.085418	10.9024	0.679665		1669.43	104.056	1621.44	122.506	1728.6	170.445	1656.7	174.164	6.19941	1728.6	170.445
062114-05_152	Price Canyon	Price River Fm.	4.24127	12.2803	0.290253	9.00559	0.105928	8.36289	0.0780053	9.15471	0.732284		1682.05	101.236	1642.8	130.615	1730.48	153.488	1518.19	134.34	5.067	1730.48	153.488
062114-05_253	Price Canyon	Price River Fm.	4.02344	16.6989	0.274851	10.3548	0.106196	13.0693	0.0890786	9.48163	0.622471		1638.95	136.623	1565.38	143.936	1735.11	239.73	1724.75	157.362	9.78205	1735.11	239.73
062114-05_292	Price Canyon	Price River Fm.	4.45631	13.3638	0.303269	9.43581	0.106621	9.42389	0.0941404	11.6669	0.709033		1722.87	111.268	1707.5	141.567	1742.43	172.706	1818.48	203.921	2.00463	1742.43	172.706
062114-05_285	Price Canyon	Price River Fm.	3.97031	12.3552	0.269936	9.23012	0.106778	8.15968	0.0522579	15.8817	0.750902		1628.15	100.539	1540.47	126.491	1745.13	149.488	1029.58	160.051	11.727	1745.13	149.488
062114-05_169	Price Canyon	Price River Fm.	3.96474	20.4719	0.266579	15.4812	0.107763	13.3588	0.0778888	14.6582	0.757753		1627.01	167.502	1523.41	210.121	1761.94	244.232	1516	215.232	13.5377	1761.94	244.232
062114-05_273	Price Canyon	Price River Fm.	4.9592	13.7095	0.330656	9.49915	0.108672	9.85081	0.08691	10.7852	0.695489		1812.39	116.351	1841.56	152.193	1777.28	179.761	1684.46	175.065	-3.6168	1777.28	179.761
062114-05_181	Price Canyon	Price River Fm.	4.00676	11.7167	0.266665	7.97239	0.10893	8.5351	0.0782657	9.52335	0.685107		1635.57	95.4878	1523.85	108.206	1781.6	155.67	1523.07	140.202	14.467	1781.6	155.67
062114-05_94	Price Canyon	Price River Fm.	4.46031	12.6509	0.296332	9.06198	0.109182	8.81711	0.0946047	13.5114	0.717115		1723.62	105.306	1673.09	133.557	1785.81	160.731	1827.05	237.42	6.31195	1785.81	160.731
062114-05_289	Price Canyon	Price River Fm.	4.03043	13.1781	0.261209	9.15437	0.111914	9.44377	0.0772403	8.40377	0.697464		1640.36	107.61	1496.02	122.236	1830.73	171.203	1503.84	122.161	18.2826	1830.73	171.203
062114-05_225	Price Canyon	Price River Fm.	5.04377	16.1743	0.322876	11.5663	0.113337	11.2565	0.0994828	12.326	0.718099		1826.7	137.899	1803.76	182.031	1853.6	203.42	1916.93	226.688	2.68872	1853.6	203.42
062114-05_68	Price Canyon	Price River Fm.	4.81212	16.6554	0.302309	12.0381	0.115516	11.4441	0.0837989	14.4418	0.726564		1787.02	140.917	1702.75	180.188	1887.95	205.983	1626.53	226.967	9.80942	1887.95	205.983
062114-05_79	Price Canyon	Price River Fm.	5.43257	11.1111	0.337834	8.12916	0.116585	7.49482	0.0836995	9.2842	0.738274		1890.01	95.5626	1876.24	132.351	1904.51	134.642	1624.67	145.457	1.48447	1904.51	134.642
062114-05_214	Price Canyon	Price River Fm.	4.37833	20.0142	0.272325	15.6189	0.116633	12.4634	0.0688755	15.5336	0.78244		1708.26	166.924	1552.59	215.586	1905.26	223.882	1346.28	203.332	18.5101	1905.26	223.882
062114-05_188	Price Canyon	Price River Fm.	5.09183	16.6351	0.307762	11.6571	0.119926	11.8486	0.0894535	9.85916	0.701911		1834.74	142.103	1729.68	176.89	1955.12	211.623	1731.71	164.288	11.5304	1955.12	211.623
062114-05_160	Price Canyon	Price River Fm.	5.50446	12.9328	0.326487	9.22379	0.122217	9.04361	0.0898785	9.09415	0.714854		1901.29	111.576	1821.33	146.374	1988.83	160.895	1739.59	152.155	8.42218	1988.83	160.895
062114-05_13	Price Canyon	Price River Fm.	6.34582	14.4537	0.355315	10.693	0.129592	9.49548	0.102176	13.1488	0.754061		2024.81	127.447	1959.93	180.761	2092.44	166.9	1966.37	247.89	6.3326	2092.44	166.9
062114-05_245	Price Canyon	Price River Fm.	5.84551	11.3187	0.325043	8.20535	0.130554	7.75712	0.0982164	9.44333	0.728231		1953.18	98.4463	1814.31	129.773	2105.43	136.142	1893.63	171.426	13.8272	2105.43	136.142
062114-05_174	Price Canyon	Price River Fm.	5.63675	17.3932	0.31274	9.67316	0.130652	14.4229	0.0916095	21.0792	0.558922		1921.74	151.103	1754.18	148.583	2106.75	253.091	1771.67	360.755	16.7353	2106.75	253.091
062114-05_280	Price Canyon	Price River Fm.	7.41418	15.3954	0.392506	10.9747	0.13699	10.7576	0.103073	11.79	0.715368		2162.68	138.599	2134.44	199.479	2189.49	187.009	1982.81	223.91	2.51445	2189.49	187.009
062114-05_256	Price Canyon	Price River Fm.	7.82716	10.7559	0.388247	7.66492	0.146222	7.49027	0.114632	8.30249	0.717685		2211.34	97.1364	2114.69	138.208	2302.21	128.678	2193.51	173.323	8.14498	2302.21	128.678
062114-05_99	Price Canyon	Price River Fm.	8.71437	18.2331	0.428827	13.8375	0.147399	11.8617	0.119322	10.8758	0.759455		2308.58	167.583	2300.43	267.873	2315.97	203.507	2278.39	235.706	0.670961	2315.97	203.507
062114-05_254	Price Canyon	Price River Fm.	9.10761	12.0819	0.391669	8.84818	0.16868	8.17636	0.100848	13.8403	0.736227		2348.87	110.98	2130.56	160.563	2544.58	137.015	1942	257.908	16.2706	2544.58	137.015
062114-05_223	Price Canyon	Price River Fm.	14.8101	12.3329	0.494532	8.88767	0.217266	8.48202	0.132838	9.97399	0.72596		2803.11	117.831	2590.25	189.636	2960.54	136.768	2521	237.789	12.5075	2960.54	136.768
062114-03_157	Price Canyon	Bluecastle T.	0.118544	42.4084	0.0113879	12.9508	0.0754911	40.3739	0.003907	14.9414	0.306018		113.751	45.6668	72.9961	9.40023	1081.61	809.88	78.8153	11.7566	35.8282	72.9961	9.40023
062114-03_196	Price Canyon	Bluecastle T.	0.0801793	23.1539	0.0116123	13.6582	0.0500606	18.6801	0.00405909	12.9367	0.590856		78.3135	17.4527	74.4264	10.1069	197.808	433.968	81.8772	10.5735	4.96344	74.4264	10.1069
062114-03_59	Price Canyon	Bluecastle T.	0.0818063	36.4817	0.0116268	13.7368	0.0510663	33.7855	0.00377377	20.7887	0.377294		79.8417	28.019	74.519	10.1776	243.822	778.29	76.1327	15.8034	6.66654	74.519	10.1776
062114-03_220	Price Canyon	Bluecastle T.	0.140686	50.6552	0.0116772	9.66673	0.0873708	49.7164	0.00428091	16.6617	0.191628		133.655	63.5191	74.8399	7.19274	1368.69	956.899	86.342	14.3604	44.005	74.8399	7.19274
062114-03_197	Price Canyon	Bluecastle T.	0.149594	48.9586	0.0119036	13.701	0.0911116	46.9959	0.00430645	27.9996	0.280307		141.554	64.7766	76.2823	10.3899	1448.94	894.695	86.856	24.2817	46.1107	76.2823	10.3899
062114-03_205	Price Canyon	Bluecastle T.	0.110191	26.171	0.0119122	9.11277	0.0670555	24.5191	0.00357812	18.9493	0.349659		106.14	26.3813	76.3373	6.91542	839.497	510.551	72.1927	13.6602	28.0786	76.3373	6.91542
062114-03_195	Price Canyon	Bluecastle T.	0.135716	59.9455	0.0120811	9.72951	0.0814496	59.1455	0.00423669	22.2286	0.162829		129.221	72.8603	77.4129	7.48685	1232.31	1160.48	85.4521	18.9636	40.0925	77.4129	7.48685
062114-03_120	Price Canyon	Bluecastle T.	0.11181	21.6182	0.0122547	10.6522	0.0661712	18.7907	0.0131051	109.169	0.494453		107.62	22.0785	78.5184	8.31322	811.795	392.979	263.163	263.163	27.0412	78.5184	8.31322
062114-03_12	Price Canyon	Bluecastle T.	0.159013	38.1395	0.0126069	10.592	0.0914485	36.6297	0.00474531	15.1822	0.278574		149.839	53.1797	80.7611	8.50087	1455.96	696.689	95.6865	14.4982	46.1013	80.7611	8.50087
062114-03_227	Price Canyon	Bluecastle T.	0.112788	26.022	0.0129001	11.8486	0.0634093	23.1515	0.00469618	15.9312	0.456566		108.512	26.7868	82.6274	9.72771	721.986	491.191	94.6981	15.0569	23.8544	82.6274	9.72771
062114-03_174	Price Canyon	Bluecastle T.	0.131437	25.8215	0.0130757	13.1565	0.0729307	22.201	0.00414614	22.5942	0.510652		125.388	30.467	83.7452	10.9467	1012.03	450.111	83.6294	18.8652	33.2113	83.7452	10.9467
062114-03_141	Price Canyon	Bluecastle T.	0.106596	20.2181	0.0143075	9.05918	0.0540436	18.0523	0.00619864	22.3502	0.450307		102.847	19.7778	91.5783	8.23759	372.867	406.382	124.902	27.8489	10.9568	91.5783	8.23759
062114-03_95	Price Canyon	Bluecastle T.	0.109715	19.6466	0.0144331	13.46	0.0551327	14.2837	0.00463402	15.349	0.686602		105.704	19.7254	92.377	12.3453	417.61	319.012	93.4476	14.3152	12.6082	92.377	12.3453
062114-03_83	Price Canyon	Bluecastle T.	0.143191	48.9686	0.0145336	10.2942	0.0714743	47.8658	0.0100548	59.8358	0.211026		135.882	62.3576	93.0151	9.50642	971.009	976.61	202.216	120.754	31.5471	93.0151	9.50642
062114-03_34	Price Canyon	Bluecastle T.	0.137375	21.6661	0.0148169	10.4872	0.0672671	18.9395	0.0073885	11.8629	0.485653		130.703	26.5776	94.8152	9.87067	846.054	393.966	148.789	17.5935	27.4577	94.8152	9.87067
062114-03_150	Price Canyon	Bluecastle T.	0.0975899	22.6062	0.0153659	13.5323	0.0460603	18.0875	0.00443229	10.8695	0.599849		94.5492	20.4118	98.3017	13.2016	0.773103	435.927	89.3885	9.69697	-3.96881	98.3017	13.2016
062114-03_13	Price Canyon	Bluecastle T.	0.114205	19.7686	0.0161267	13.7333	0.0513409	14.1953	0.00487418	16.0993	0.695969		109.805	20.5772	103.13	14.0505	256.165	326.27	98.2788	15.79	6.07879	103.13	14.0505
062114-03_105	Price Canyon	Bluecastle T.	0.14366	16.4738	0.0184432	10.5281	0.0564861	12.639	0.00595375	21.9189	0.641391		136.299	21.0148	117.809	12.2905	471.527	279.628	119.982	26.2379	13.5656	117.809	12.2905
062114-03_24	Price Canyon	Bluecastle T.	0.293945	44.417	0.0216214	7.93677	0.0986146	43.6939	0.00801595	10.3293	0.179712		261.66	102.804	137.895	10.8282	1598.09	815.666	161.374	16.6093	47.2998	137.895	10.8282
062114-03_91	Price Canyon	Bluecastle T.	0.19721	22.475	0.0216934	8.84076	0.0659358	20.6439	0.00708058	14.571	0.395372		182.762	37.6086	138.349	12.1008	804.337	432.243	142.61	20.7171	24.3009	138.349	12.1008
062114-03_247	Price Canyon	Bluecastle T.	0.151624	21.7594	0.0220533	13.9521	0.0498634	16.6762	0.00714205	14.7932	0.642378		143.345	29.0974	140.62	19.407	188.631	388.054	143.844	21.2147	1.90119	140.62	19.407
062114-03_122	Price Canyon	Bluecastle T.	0.18745	17.5912	0.0227405	9.92436	0.0597889	14.4976	0.00947648	15.7682	0.566389		174.451	28.2037	144.953	14.2251	595.942	314.066	190.639	29.9412	16.9093	144.953	14.2251
062114-03_55	Price Canyon	Bluecastle T.	0.201373	23.0542	0.022943	10.2205	0.0636888	20.6466	0.00769905	15.6672	0.444935		186.287	39.2572	146.229	14.7772	731.311	437.383	155.019	24.2087	21.5035	146.229	14.7772
062114-03_14	Price Canyon	Bluecastle T.	0.165	14.7395	0.0232797	9.7243	0.0513808	11.0456	0.0077085	10.2365	0.662133		155.07	21.1998	148.351	14.2614	257.952	253.793	155.209	15.8332	4.3332	148.351	14.2614
062114-03_183	Price Canyon	Bluecastle T.	0.164794	13.6173	0.023392	8.54742	0.0511028	10.5682	0.00754254	9.46965	0.630638		154.891	19.5644	149.058	12.5945	245.469	243.377	151.879	14.3336	3.76587	149.058	12.5945
062114-03_238	Price Canyon	Bluecastle T.	0.166542	21.3216	0.0234814	10.0148	0.0514344	18.8035	0.00794168	13.0572	0.471448		156.413	30.9177	149.621	14.8116	260.344	431.857	159.885	20.8048	4.34257	149.621	14.8116
062114-03_232	Price Canyon	Bluecastle T.	0.178182	15.4949	0.0240059	9.58658	0.0538292	12.1423	0.00815479	11.7229	0.62123		166.495	23.7985	152.924	14.4877	363.911	273.777	164.158	19.1752	8.15106	152.924	14.4877
062114-03_233	Price Canyon	Bluecastle T.	0.337599	43.0206	0.0247353	10.6135	0.0989815	41.6818	0.00890247	17.3185	0.247532		295.351	110.687	157.514	16.5152	1605.02	777.414	179.143	30.9113	46.6689	157.514	16.5152
062114-03_214	Price Canyon	Bluecastle T.	0.182197	12.7149	0.0249559	8.00481	0.0529399	9.83899	0.00836508	14.9069	0.63342		169.95	19.8998	158.902	12.5643	326.223	223.293	168.374	25.0105	6.50082	158.902	12.5643
062114-03_211	Price Canyon	Bluecastle T.	0.189411	13.7167	0.0249562	8.71612	0.0550259	10.5547	0.00787959	10.6479	0.638682		176.126	22.1831	158.903	13.6809	413.276	235.907	158.64	16.8327	9.77875	158.903	13.6809
062114-03_243	Price Canyon	Bluecastle T.	0.245501	18.3409	0.0250028	11.5487	0.0712067	14.2227	0.010258	22.6023	0.631398		222.915	36.7239	159.196	18.1601	963.353	290.518	206.281	46.4406	28.5843	159.196	18.1601
062114-03_236	Price Canyon	Bluecastle T.	0.173944	14.2604	0.0250747	8.6698	0.0503076	11.2891	0.0079993	10.8752	0.610994		162.836	21.458	159.649	13.6713	209.23	261.714	161.04	17.4514	1.9574	159.649	13.6713
062114-03_25	Price Canyon	Bluecastle T.	0.199489	16.356	0.0251478	9.66107	0.0575445	13.1704	0.00808579	11.1696	0.592965		184.694	27.6273	160.108	15.2777	512.462	289.396	162.775	18.1164	13.3117	160.108	15.2777
062114-03_85	Price Canyon	Bluecastle T.	0.216802	18.2122	0.025395	9.46844	0.0619302	15.5312	0.00861337	10.7608	0.522255		199.244	32.96	161.662	15.1166	671.7	332.238	173.35	18.5826	18.8623	161.662	15.1166
062114-03_16	Price Canyon	Bluecastle T.	0.197123	19.6922	0.0254214	12.4457	0.0562007	15.2385	0.00916877	14.9721	0.633391		182.689	32.9363	161.828	19.8901	460.304	337.799	184.477	27.5132	11.4186	161.828	19.8901
062114-03_170	Price Canyon	Bluecastle T.	0.236312	15.3125	0.0256889	9.40642	0.0667373	12.0509	0.0167946	34.9125	0.616961		215.396	29.7273	163.51	15.187	829.587	251.321	336.638	116.893	24.0886	163.51	15.187
062114-03_129	Price Canyon	Bluecastle T.	0.221107	28.3074	0.0262118	13.6603	0.061195	24.7774	0.0083209	14.2796	0.483587		202.831	52.0907	166.796	22.4926	646.097	532.278	167.488	23.8318	17.7662	166.796	22.4926
062114-03_215	Price Canyon	Bluecastle T.	0.197351	19.0325	0.026367	9.27597	0.0542752	16.5954	0.00836413	12.8627	0.489597		182.882	31.8629	167.77	15.3616	382.486	372.948	168.355	21.5765	8.26332	167.77	15.3616
062114-03_111	Price Canyon	Bluecastle T.	0.61042	78.0399	0.026556	11.938	0.166688	77.1162	0.0122811	18.7127	0.153407		483.825	309.607	168.958	19.9083	2524.66	1294.84	246.716	45.9389	65.0788	168.958	19.9083
062114-03_10	Price Canyon	Bluecastle T.	0.237523	28.3501	0.0267096	13.6294	0.0645136	24.8452	0.00975735	14.737	0.481639		216.39	55.3053	169.922	22.8568	758.513	524.025	196.262	28.8036	21.4743	169.922	22.8568
062114-03_101	Price Canyon	Bluecastle T.	0.200107	19.3998	0.0275592	14.4519	0.0526555	12.9113	0.00948972	20.2565	0.746365		185.216	32.8564	175.254	24.9866	313.98	293.664	190.904	38.5252	5.37865	175.254	24.9866
062114-03_22	Price Canyon	Bluecastle T.	0.225084	30.3998	0.0279135	10.1415	0.0584832	28.6458	0.0273539	102.032	0.334766		206.132	56.7716	177.476	17.7532	547.912	625.632	545.456	545.456	13.9017	177.476	17.7532
062114-03_58	Price Canyon	Bluecastle T.	0.20607	20.075	0.0281341	13.571	0.0531578	14.7673	0.00803632	10.0881	0.677407		190.249	34.8415	178.86	23.9395	335.54	334.657	161.783	16.2623	5.98678	178.86	23.9395
062114-03_192	Price Canyon	Bluecastle T.	0.230518	15.6278	0.0282303	8.00751	0.0592098	13.3975	0.0104595	11.4123	0.514843		210.626	29.735	179.463	14.1724	574.818	291.271	210.311	23.891	14.7955	179.463	14.1724
062114-03_177	Price Canyon	Bluecastle T.	0.216417	17.4373	0.0288468	9.28389	0.0544319	14.7344	0.0105454	14.3307	0.534775		198.923	31.5106	183.326	16.7801	388.963	330.747	212.031	30.2493	7.84064	183.326	16.7801
062114-03_42	Price Canyon	Bluecastle T.	0.30548	45.1576	0.0334094	14.6196	0.066317	42.7169	0.00954239	11.7825	0.32431		270.671	107.695	211.851	30.4686	816.396	892.71	191.959	22.5229	21.7312	211.851	30.4686
062114-03_176	Price Canyon	Bluecastle T.	0.279335	13.7581	0.0368047	7.8978	0.0550659	11.2314	0.0132528	13.5131	0.577576		250.13	30.5113	232.996	18.0731	414.901	250.96	266.109	35.7555	6.84992	232.996	18.0731
062114-03_41	Price Canyon	Bluecastle T.	0.41235	14.802	0.0505823	9.22441	0.0591271	11.5441	0.021845	61.8777	0.625908		350.566	43.908	318.096	28.6304	571.779	251.106	436.783	269.156	9.26224	318.096	28.6304
062114-03_161	Price Canyon	Bluecastle T.	0.412809	13.5496	0.0517875	8.8157	0.0578153	10.2547	0.0188237	11.1666	0.653619		350.896	40.2205	325.487	27.9818	522.771	224.931	376.933	41.7434	7.24123	325.487	27.9818
062114-03_08	Price Canyon	Bluecastle T.	0.42258	11.6515	0.0524492	7.95637	0.0584531	8.47305	0.0161896	10.9254	0.68643		357.894	35.1575	329.541	25.5607	546.785	185.089	324.608	35.2122	7.92226	329.541	25.5607
062114-03_133	Price Canyon	Bluecastle T.	0.521601	14.4082	0.0611095	9.41398	0.0619236	10.87	0.0189419	10.7667	0.656388		426.221	50.1916	382.369	34.9498	671.47	232.535	379.278	40.4955	10.2884	382.369	34.9498
062114-03_110	Price Canyon	Bluecastle T.	0.622563	28.3422	0.0612969	10.0632	0.0736515	26.4803	0.0300004	39.0938	0.356478		491.452	110.858	383.508	37.4682	1031.93	535.169	597.458	231.471	21.9645	383.508	37.4682
062114-03_213	Price Canyon	Bluecastle T.	0.5594	13.3054	0.0671172	7.81746	0.0604314	10.7301	0.0216117	10.6629	0.591313		451.136	48.5011	418.764	31.6963	619.056	231.55	432.167	45.6438	7.17551	418.764	31.6963
062114-03_93	Price Canyon	Bluecastle T.	0.554377	22.5469	0.0677132	11.4614	0.0593807	19.396	0.0224004	16.291	0.509875		447.86	81.8286	422.364	46.8579	581.081	421.235	447.766	72.2724	5.69292	422.364	46.8579
062114-03_258	Price Canyon	Bluecastle T.	0.916283	14.9401	0.096386	8.47889	0.0689587	12.2741	0.0722291	46.9943	0.570137		660.392	72.6596	593.195	48.0525	897.505	253.293	1409.6	650.205	10.1754	593.195	48.0525
062114-03_62	Price Canyon	Bluecastle T.	1.8028	17.4376	0.163914	10.8747	0.0798513	13.6036	0.0576906	22.0298	0.625622		1046.47	114.368	978.492	98.7332	1193.32	268.421	1133.66	244.339	18.0024	978.492	98.7332
062114-03_182	Price Canyon	Bluecastle T.	1.6569	21.2805	0.166043	15.3917	0.0723872	14.6717	0.0525698	11.019	0.724339		992.194	135.551	990.271	141.313	996.846	298.127	1035.57	111.542	0.659595	990.271	141.313
062114-03_99	Price Canyon	Bluecastle T.	1.78936	14.4091	0.167443	10.5226	0.0775003	9.80392	0.057199	26.5721	0.732846		1041.59	94.1241	998.007	97.2988	1134.09	195.133	1124.26	292.694	11.9996	998.007	97.2988
062114-03_173	Price Canyon	Bluecastle T.	1.81133	11.4226	0.167824	8.10095	0.0783065	8.00481	0.0524402	8.99723	0.713381		1049.56	74.8627	1000.11	75.0501	1154.66	158.843	1033.08	90.8165	13.3847	1000.11	75.0501
062114-03_159	Price Canyon	Bluecastle T.	1.84453	12.5232	0.168814	8.43461	0.0792406	9.21901	0.0718834	21.1532	0.676825		1061.48	82.6379	1005.57	78.5359	1178.15	182.308	1403.08	288.783	14.648	1005.57	78.5359
062114-03_32	Price Canyon	Bluecastle T.	1.80168	10.4802	0.169714	6.85941	0.0770239	7.87715	0.058005	11.1814	0.659617		1046.07	68.5361	1010.53	64.159	1121.81	157.069	1139.67	124.286	9.91927	1010.53	64.159
062114-03_47	Price Canyon	Bluecastle T.	1.72875	16.8259	0.170302	9.73707	0.0736248	13.6949	0.0502606	14.5429	0.580985		1019.29	108.65	1013.77	91.3477	1031.2	276.807	991.174	141.16	1.69	1013.77	91.3477
062114-03_167	Price Canyon	Bluecastle T.	1.87321	12.8672	0.170527	9.55554	0.0796881	8.57323	0.0565412	10.2117	0.745701		1071.66	85.3794	1015.02	89.7457	1189.28	169.263	1111.68	110.759	14.6529	1015.02	89.7457
062114-03_235	Price Canyon	Bluecastle T.	1.804	14.5212	0.170593	9.78305	0.0766903	10.6961	0.051084	11.8545	0.676349		1046.91	95.1393	1015.38	91.9128	1113.15	213.553	1007.01	116.788	8.78352	1015.38	91.9128
062114-03_135	Price Canyon	Bluecastle T.	1.82966	11.0383	0.171674	7.62222	0.0773191	7.93234	0.0552562	11.3318	0.695417		1056.16	72.5948	1021.33	71.9973	1129.43	157.991	1087.09	120.29	9.57135	1021.33	71.9973
062114-03_107	Price Canyon	Bluecastle T.	1.88685	13.8522	0.172897	9.68831	0.0791382	9.8598	0.0536638	15.5622	0.702403		1076.47	92.1834	1028.05	92.0711	1175.59	195.053	1056.56	160.839	12.5504	1028.05	92.0711
062114-03_239	Price Canyon	Bluecastle T.	1.89161	13.8767	0.173552	9.52715	0.0790413	10.0523	0.0576898	11.5362	0.68938		1078.15	92.428	1031.65	90.8315	1173.17	198.932	1133.64	127.581	12.063	1031.65	90.8315
062114-03_178	Price Canyon	Bluecastle T.	1.91753	11.0048	0.173712	7.57348	0.0800885	7.93651	0.0566819	10.2287	0.692754		1087.21	73.5693	1032.53	72.2602	1199.17	156.467	1114.38	111.206	13.8962	1032.53	72.2602
062114-03_69	Price Canyon	Bluecastle T.	1.81521	16.1513	0.174091	11.4499	0.0756921	11.3578	0.0523306	13.6049	0.710979		1050.96	106.128	1034.61	109.455	1086.94	227.651	1030.97	137.211	4.81424	1034.61	109.455
062114-03_165	Price Canyon	Bluecastle T.	1.94673	11.9056	0.174583	8.01688	0.0808857	8.75978	0.0575004	11.1502	0.677241		1097.32	80.0282	1037.31	76.8178	1218.67	172.211	1130.03	122.915	14.8815	1037.31	76.8178
062114-03_199	Price Canyon	Bluecastle T.	2.02757	11.6777	0.175563	7.89283	0.0837261	8.57019	0.0466817	9.49968	0.679271		1124.8	79.5711	1042.69	75.9903	1286.2	166.865	922.18	85.8177	18.9324	1042.69	75.9903
062114-03_210	Price Canyon	Bluecastle T.	1.92427	13.0166	0.176853	8.36929	0.0788808	9.93094	0.0533447	16.1034	0.646472		1089.55	87.1847	1049.76	81.0812	1169.14	196.646	1050.44	165.512	10.2113	1049.76	81.0812
062114-03_158	Price Canyon	Bluecastle T.	1.98362	12.7372	0.177455	8.57223	0.0810653	9.3838	0.0623501	13.1871	0.676204		1109.95	86.1909	1053.06	83.2876	1223.03	184.363	1222.51	157.043	13.8975	1053.06	83.2876
062114-03_80	Price Canyon	Bluecastle T.	1.95755	15.5052	0.177719	11.1945	0.0799202	10.6908	0.0555489	12.328	0.724291		1101.04	104.573	1054.5	108.907	1195.02	210.895	1092.69	131.558	11.7584	1054.5	108.907
062114-03_70	Price Canyon	Bluecastle T.	2.01375	15.9761	0.17787	11.5655	0.0821842	10.9869	0.0552804	9.11594	0.725991		1120.16	108.807	1055.33	112.598	1249.91	215.028	1087.55	96.7515	15.5678	1055.33	112.598
062114-03_115	Price Canyon	Bluecastle T.	1.78725	13.9493	0.177896	9.18874	0.0728574	10.457	0.055503	10.3504	0.66185		1040.82	91.0659	1055.47	89.4666	1009.99	212.073	1091.81	110.309	-4.50287	1055.47	89.4666
062114-03_202	Price Canyon	Bluecastle T.	1.9681	12.3496	0.179257	8.85174	0.0795896	8.57273	0.0473054	11.701	0.719814		1104.66	83.3342	1062.91	86.744	1186.84	169.314	934.221	107.109	10.4417	1062.91	86.744
062114-03_124	Price Canyon	Bluecastle T.	1.78605	18.6366	0.179864	13.5253	0.0720289	12.7912	0.0374843	10.0687	0.727274		1040.39	121.894	1066.23	132.935	986.758	260.303	743.787	73.6626	-8.0541	1066.23	132.935
062114-03_40	Price Canyon	Bluecastle T.	2.05773	15.3204	0.181286	10.4678	0.0823373	11.1535	0.0482835	25.343	0.685561		1134.87	105.059	1074	103.566	1253.55	218.175	953.088	237.323	14.3236	1074	103.566
062114-03_96	Price Canyon	Bluecastle T.	1.96457	18.5487	0.181413	12.4288	0.0785419	13.7402	0.0513031	15.8277	0.67177		1103.45	125.444	1074.69	123.045	1160.62	272.413	1011.23	156.722	7.40364	1074.69	123.045
062114-03_208	Price Canyon	Bluecastle T.	1.91317	12.4384	0.183275	7.89742	0.0756726	9.57178	0.0509228	9.00321	0.638614		1085.69	83.1285	1084.84	78.8574	1086.42	191.867	1003.91	88.3694	0.145468	1084.84	78.8574
062114-03_46	Price Canyon	Bluecastle T.	1.94003	14.9317	0.184336	10.5806	0.0763312	10.5004	0.0539931	10.2975	0.710968		1095.01	100.371	1090.62	106.17	1103.77	209.938	1062.88	106.904	1.19132	1090.62	106.17
062114-03_39	Price Canyon	Bluecastle T.	1.94907	14.4826	0.184493	8.58982	0.0766361	11.6285	0.0553117	9.13538	0.596081		1098.13	97.4878	1091.48	86.2535	1111.74	232.217	1088.15	97.0104	1.8224	1091.48	86.2535
062114-03_05	Price Canyon	Bluecastle T.	2.10448	10.1818	0.190105	6.97483	0.080317	7.37762	0.0589701	7.89075	0.68919		1150.27	70.1939	1121.94	71.8253	1204.78	145.331	1158.1	89.0095	6.87606	1121.94	71.8253
062114-03_57	Price Canyon	Bluecastle T.	2.01529	11.3491	0.191905	7.8826	0.0762105	8.11849	0.0623275	7.79882	0.69879		1120.68	77.1679	1131.69	81.8193	1100.6	162.392	1222.08	92.6957	-2.82406	1131.69	81.8193
062114-03_163	Price Canyon	Bluecastle T.	2.06469	13.1065	0.191987	9.40423	0.078006	9.08913	0.056363	14.3342	0.720477		1137.17	89.8909	1132.13	97.6506	1147.03	180.562	1108.27	155.18	1.29872	1132.13	97.6506
062114-03_145	Price Canyon	Bluecastle T.	2.28777	14.3939	0.193251	8.98756	0.0858651	11.2077	0.0636511	14.7202	0.627478		1208.52	102.042	1138.96	93.8385	1335.15	216.722	1247.24	178.836	14.6939	1138.96	93.8385
062114-03_181	Price Canyon	Bluecastle T.	2.15401	11.8141	0.196828	8.19136	0.079389	8.47167	0.0576562	10.2015	0.697001		1166.35	82.1036	1158.26	86.8473	1181.85	167.439	1133	112.717	1.99603	1158.26	86.8473
062114-03_207	Price Canyon	Bluecastle T.	2.10004	13.4137	0.200584	9.48231	0.0758955	9.44978	0.0519352	10.151	0.709723		1148.82	92.5207	1178.46	102.134	1092.31	189.255	1023.38	101.551	-7.88618	1178.46	102.134
062114-03_117	Price Canyon	Bluecastle T.	2.44314	11.0858	0.201581	8.07293	0.0878945	7.54483	0.055149	9.2856	0.732681		1255.4	80.0364	1183.81	87.3118	1380.18	144.987	1085.03	98.334	14.2279	1183.81	87.3118
062114-03_193	Price Canyon	Bluecastle T.	2.52779	13.621	0.221306	9.22264	0.0828204	9.99315	0.0646734	11.5525	0.679524		1280.06	99.4173	1288.77	107.741	1264.99	195.158	1266.66	142.341	-1.88027	1264.99	195.158
062114-03_142	Price Canyon	Bluecastle T.	2.37831	12.5029	0.207093	8.80804	0.0833025	8.82761	0.0685107	19.5392	0.708176		1236.1	89.6055	1213.31	97.4217	1276.31	172.118	1339.38	254.821	4.93618	1276.31	172.118
062114-03_100	Price Canyon	Bluecastle T.	2.74885	21.1084	0.234098	16.0135	0.0851572	13.7241	0.0741184	22.3411	0.759786		1341.78	158.432	1355.94	195.879	1319.12	265.978	1445.18	314.023	-2.79127	1319.12	265.978
062114-03_75	Price Canyon	Bluecastle T.	2.4252	15.6531	0.205585	11.1245	0.0856094	10.9764	0.0653588	10.1405	0.712942		1250.1	113.001	1205.25	122.305	1329.38	212.421	1279.67	126.135	9.33708	1329.38	212.421
062114-03_194	Price Canyon	Bluecastle T.	2.76859	13.2847	0.232517	9.51596	0.0863338	9.23688	0.0679756	9.75924	0.718723		1347.11	99.4139	1347.68	115.739	1345.67	178.351	1329.25	125.943	-0.149559	1345.67	178.351
062114-03_01	Price Canyon	Bluecastle T.	3.06653	16.7086	0.253011	11.9046	0.0879288	11.7066	0.0694881	16.0547	0.713524		1424.37	128.619	1453.98	154.99	1380.93	224.938	1357.86	211.946	-5.29036	1380.93	224.938
062114-03_52	Price Canyon	Bluecastle T.	2.51749	14.4841	0.207581	11.353	0.0879873	8.95219	0.0625509	11.7057	0.786127		1277.1	105.638	1215.92	125.822	1382.21	171.983	1226.33	139.764	12.0307	1382.21	171.983
062114-03_190	Price Canyon	Bluecastle T.	3.01696	9.05395	0.248615	6.62232	0.0880043	6.12278	0.0693398	7.41745	0.736687		1411.92	69.153	1431.33	85.0065	1382.58	117.621	1355.06	97.4501	-3.52592	1382.58	117.621
062114-03_116	Price Canyon	Bluecastle T.	2.62458	11.9034	0.21602	8.48111	0.0881096	8.30428	0.0672093	8.41917	0.716458		1307.55	87.7366	1260.81	97.1309	1384.88	159.478	1314.75	107.453	8.95855	1384.88	159.478
062114-03_71	Price Canyon	Bluecastle T.	3.02631	10.826	0.243597	7.62572	0.0901736	7.6341	0.0809682	20.2283	0.709063		1414.28	82.807	1405.37	96.2994	1429.21	145.723	1573.67	308.593	1.6681	1429.21	145.723
062114-03_180	Price Canyon	Bluecastle T.	3.22115	18.1489	0.257102	12.8081	0.0908979	12.8291	0.0739509	10.2535	0.707335		1462.26	141.534	1475	168.903	1444.46	244.384	1442.03	143.213	-2.11383	1444.46	244.384
062114-03_188	Price Canyon	Bluecastle T.	2.97261	10.8553	0.237102	7.96052	0.0909281	7.3364	0.0732272	20.0308	0.737063		1400.64	82.6594	1371.62	98.3612	1445.1	139.741	1428.4	278.149	5.08483	1445.1	139.741
062114-03_94	Price Canyon	Bluecastle T.	2.8839	14.5191	0.228351	10.6143	0.091598	9.86655	0.0681727	12.1162	0.733628		1377.71	109.894	1325.85	127.217	1459.07	187.576	1332.99	156.904	9.13001	1459.07	187.576
062114-03_189	Price Canyon	Bluecastle T.	3.20679	15.1476	0.253848	10.6338	0.0916171	10.758	0.0718862	9.87942	0.70399		1458.8	117.77	1458.29	138.804	1459.46	204.513	1403.13	134.365	0.0801185	1459.46	204.513
062114-03_35	Price Canyon	Bluecastle T.	2.8402	13.4374	0.221655	9.22913	0.0929632	9.72882	0.0731118	19.7438	0.689793		1366.22	101.245	1290.61	107.957	1487.14	184.268	1426.23	273.732	13.2148	1487.14	184.268
062114-03_257	Price Canyon	Bluecastle T.	3.36468	11.919	0.261984	8.96876	0.0931652	7.80809	0.0726582	8.75775	0.755553		1496.21	93.5596	1499.98	120.039	1491.25	147.808	1417.68	120.26	-0.585783	1491.25	147.808
062114-03_87	Price Canyon	Bluecastle T.	2.86545	10.87	0.222939	7.67837	0.0932343	7.64102	0.0748341	10.4969	0.711259		1372.88	81.9962	1297.39	90.2396	1492.65	144.618	1458.64	148.261	13.0817	1492.65	144.618
062114-03_11	Price Canyon	Bluecastle T.	3.17614	21.7072	0.244332	16.3448	0.0942545	14.2602	0.0944411	20.5641	0.753949		1451.38	169.181	1409.18	206.962	1513.22	269.164	1824.03	361.888	6.87541	1513.22	269.164
062114-03_171	Price Canyon	Bluecastle T.	3.30352	13.6019	0.253205	9.74598	0.0946568	9.44752	0.0767429	10.435	0.719428		1481.88	106.407	1454.98	126.955	1521.25	178.135	1494.5	150.888	4.35639	1521.25	178.135
062114-03_51	Price Canyon	Bluecastle T.	3.56333	19.2964	0.261116	16.3178	0.0990008	10.2628	0.0480336	25.8867	0.846841		1541.41	154.17	1495.55	217.884	1605.38	191.404	948.27	241.24	6.84138	1605.38	191.404
062114-03_136	Price Canyon	Bluecastle T.	3.36072	17.5163	0.24335	11.9282	0.100189	12.795	0.0754517	18.0495	0.682953		1495.29	137.913	1404.09	150.525	1627.59	237.953	1470.25	257.585	13.732	1627.59	237.953
062114-03_216	Price Canyon	Bluecastle T.	3.93511	15.3127	0.284731	10.6863	0.100219	10.9316	0.0824191	12.8297	0.700264		1620.93	124.599	1615.15	152.704	1628.15	203.284	1600.78	198.424	0.798903	1628.15	203.284
062114-03_48	Price Canyon	Bluecastle T.	3.27667	16.1574	0.233741	12.0892	0.101676	10.6846	0.05937	13.4753	0.750141		1475.53	126.346	1354.08	147.674	1654.94	197.961	1165.73	153.221	18.1799	1654.94	197.961
062114-03_228	Price Canyon	Bluecastle T.	4.02657	17.4367	0.284891	12.713	0.102504	11.902	0.0768046	10.8682	0.73081		1639.58	142.76	1615.95	181.758	1669.95	220.1	1495.66	157.294	3.23373	1669.95	220.1
062114-03_252	Price Canyon	Bluecastle T.	3.95138	14.1694	0.279164	10.2817	0.102671	9.71482	0.0834945	10.1555	0.727965		1624.27	115.31	1587.15	144.674	1672.95	179.585	1620.85	158.8	5.12868	1672.95	179.585
062114-03_60	Price Canyon	Bluecastle T.	4.23292	12.2189	0.299159	9.01909	0.1027	8.19761	0.0903728	14.1801	0.74156		1680.43	100.688	1687.14	133.901	1673.48	151.528	1748.75	238.958	-0.816524	1673.48	151.528
062114-03_27	Price Canyon	Bluecastle T.	4.03139	10.7213	0.283687	7.96967	0.103095	7.12062	0.0910932	9.38096	0.747607		1640.55	87.4413	1609.9	113.549	1680.58	131.503	1762.11	158.925	4.2054	1680.58	131.503
062114-03_84	Price Canyon	Bluecastle T.	4.00286	10.5691	0.281553	7.69723	0.103135	7.18643	0.0782441	8.75561	0.733277		1634.78	86.0711	1599.18	109.023	1681.29	132.707	1522.67	128.83	4.88399	1681.29	132.707
062114-03_04	Price Canyon	Bluecastle T.	4.13941	15.53	0.290526	10.7422	0.103373	11.1902	0.0847583	10.1423	0.6934		1662.12	127.676	1644.16	155.924	1685.55	206.532	1644.41	160.814	2.45576	1685.55	206.532
062114-03_253	Price Canyon	Bluecastle T.	4.41816	10.469	0.309677	7.50436	0.10349	7.25316	0.0826563	8.1567	0.721119		1715.75	86.8924	1739.12	114.399	1687.64	133.833	1605.21	126.261	-3.05057	1687.64	133.833
062114-03_17	Price Canyon	Bluecastle T.	4.36583	10.5743	0.305588	7.82219	0.103555	7.06694	0.0938174	10.572	0.74389		1705.9	87.5759	1718.96	118.039	1688.8	130.377	1812.51	184.114	-1.78618	1688.8	130.377
062114-03_114	Price Canyon	Bluecastle T.	4.21307	13.5404	0.294471	9.63647	0.103754	9.46984	0.125349	10.082	0.714762		1676.57	111.56	1663.83	141.337	1692.34	174.631	2386.93	228.268	1.6843	1692.34	174.631
062114-03_212	Price Canyon	Bluecastle T.	4.24531	17.8344	0.296485	13.0021	0.103814	12.1751	0.0875914	11.2747	0.730725		1682.83	147.595	1673.86	191.732	1693.4	224.488	1697.13	184.371	1.15434	1693.4	224.488
062114-03_132	Price Canyon	Bluecastle T.	4.01854	14.1686	0.279883	9.99525	0.104164	10.0016	0.0872206	11.5352	0.708321		1637.95	115.697	1590.77	140.925	1699.6	184.269	1690.24	187.913	6.40309	1699.6	184.269
062114-03_45	Price Canyon	Bluecastle T.	4.61893	11.552	0.319932	8.38995	0.104709	7.89358	0.0746035	15.1379	0.730138		1752.69	96.7129	1789.4	131.112	1709.21	145.257	1454.31	213.542	-4.6912	1709.21	145.257
062114-03_251	Price Canyon	Bluecastle T.	4.17386	11.7234	0.288978	8.35283	0.104766	8.18425	0.0817837	9.14461	0.715997		1668.9	96.3179	1636.42	120.732	1710.21	150.588	1588.91	140.22	4.31466	1710.21	150.588
062114-03_204	Price Canyon	Bluecastle T.	4.04958	12.3453	0.279539	8.65419	0.105014	8.76504	0.0884667	8.86131	0.704221		1644.21	100.858	1589.04	121.895	1714.56	161.187	1713.39	146.098	7.32094	1714.56	161.187
062114-03_127	Price Canyon	Bluecastle T.	4.29918	10.7663	0.296053	7.76796	0.105345	7.4021	0.0884182	7.51789	0.726177		1693.2	88.9166	1671.71	114.398	1720.35	136.025	1712.49	123.819	2.82732	1720.35	136.025
062114-03_137	Price Canyon	Bluecastle T.	4.43561	11.936	0.301602	8.51315	0.106692	8.31664	0.0916647	8.89139	0.717304		1719.01	99.2136	1699.25	127.181	1743.66	152.391	1772.69	151.469	2.54679	1743.66	152.391
062114-03_128	Price Canyon	Bluecastle T.	4.14022	12.1651	0.28137	8.42516	0.106746	8.73047	0.0326024	22.527	0.696397		1662.28	99.8119	1598.26	119.275	1744.58	159.956	648.453	144.272	8.38711	1744.58	159.956
062114-03_203	Price Canyon	Bluecastle T.	4.2592	10.2872	0.289195	7.21788	0.106763	7.28372	0.0771945	8.06555	0.706192		1685.51	84.7899	1637.5	104.385	1744.87	133.444	1502.98	117.165	6.15345	1744.87	133.444
062114-03_64	Price Canyon	Bluecastle T.	4.24482	13.0013	0.287345	9.57305	0.107253	8.7542	0.0872795	9.42087	0.739348		1682.74	107.24	1628.25	137.766	1753.25	160.22	1691.33	153.435	7.1299	1753.25	160.22
062114-03_104	Price Canyon	Bluecastle T.	4.53785	17.5233	0.30494	12.0295	0.107914	12.7105	0.087777	10.2836	0.688381		1737.94	146.813	1715.76	181.261	1764.49	232.308	1700.58	168.426	2.76214	1764.49	232.308
062114-03_146	Price Canyon	Bluecastle T.	4.37846	12.696	0.293495	8.81595	0.108203	9.09272	0.0836065	12.0846	0.697916		1708.28	105.321	1658.97	128.968	1769.37	166.087	1622.94	189.341	6.23965	1769.37	166.087
062114-03_240	Price Canyon	Bluecastle T.	4.37556	11.1597	0.292059	7.87141	0.108646	7.8636	0.0874591	8.46061	0.709577		1707.74	92.4895	1651.81	114.711	1776.83	143.505	1694.67	138.003	7.03609	1776.83	143.505
062114-03_140	Price Canyon	Bluecastle T.	4.92638	12.4761	0.325818	8.50681	0.109685	9.08072	0.0947895	10.7289	0.685747		1806.79	105.684	1818.08	134.784	1794.19	165.368	1830.46	188.637	-1.33166	1794.19	165.368
062114-03_244	Price Canyon	Bluecastle T.	4.16434	18.902	0.274765	12.8629	0.109912	13.824	0.0792712	13.4036	0.682004		1667.03	155.979	1564.94	178.771	1797.95	251.632	1541.91	199.971	12.9598	1797.95	251.632
062114-03_07	Price Canyon	Bluecastle T.	4.32637	11.2385	0.284461	7.91158	0.110344	7.94141	0.0823696	8.34313	0.707598		1698.4	92.9483	1613.79	112.961	1805.08	144.391	1599.85	128.741	10.5973	1805.08	144.391
062114-03_61	Price Canyon	Bluecastle T.	4.12521	13.2732	0.269405	10.6749	0.111159	7.84012	0.0667389	25.7276	0.806914		1659.31	108.893	1537.78	146.071	1818.45	142.331	1305.84	327.985	15.4346	1818.45	142.331
062114-03_175	Price Canyon	Bluecastle T.	5.07692	11.9219	0.324897	8.30077	0.113374	8.51233	0.104586	10.8524	0.70015		1832.26	101.469	1813.6	131.238	1854.19	153.819	2010.53	208.764	2.18909	1854.19	153.819
062114-03_90	Price Canyon	Bluecastle T.	4.61316	16.4377	0.293331	11.9939	0.114072	11.2043	0.0839332	14.2104	0.731708		1751.65	138.015	1658.15	175.401	1865.28	202.2	1629.03	223.642	11.1043	1865.28	202.2
062114-03_65	Price Canyon	Bluecastle T.	5.16836	12.3079	0.322885	8.97424	0.116212	8.37802	0.0964658	9.16217	0.732568		1847.42	105.086	1803.8	141.225	1898.75	150.608	1861.39	163.586	5.00049	1898.75	150.608
062114-03_230	Price Canyon	Bluecastle T.	5.06842	11.3042	0.315083	8.04715	0.116662	7.89114	0.100635	8.24389	0.71604		1830.84	96.1529	1765.67	124.304	1905.69	141.742	1938.09	152.93	7.34739	1905.69	141.742
062114-03_168	Price Canyon	Bluecastle T.	4.93612	13.9162	0.305927	9.59916	0.117052	10.0378	0.0957875	13.9532	0.692624		1808.45	118.028	1720.63	144.985	1911.69	180.177	1848.88	248.047	9.99398	1911.69	180.177
062114-03_73	Price Canyon	Bluecastle T.	4.83459	16.0323	0.298002	9.65617	0.117744	12.7677	0.0941625	11.4634	0.604808		1790.94	135.691	1681.4	142.935	1922.27	228.899	1818.88	200.39	12.5307	1922.27	228.899
062114-03_76	Price Canyon	Bluecastle T.	5.20046	10.2224	0.319738	7.28887	0.11803	7.11213	0.096616	8.80595	0.718316		1852.69	87.271	1788.45	113.849	1926.62	127.442	1864.16	157.425	7.17143	1926.62	127.442
062114-03_149	Price Canyon	Bluecastle T.	5.03035	13.2893	0.30315	9.08665	0.120345	9.65776	0.0956894	11.3774	0.686929		1824.45	113.025	1706.91	136.286	1961.34	172.371	1847.07	201.837	12.9722	1961.34	172.371
062114-03_143	Price Canyon	Bluecastle T.	5.39718	13.9717	0.323657	9.84348	0.120956	9.87452	0.0985138	9.46155	0.70747		1884.41	120.249	1807.56	155.189	1970.38	176.059	1899.1	172.233	8.26307	1970.38	176.059
062114-03_259	Price Canyon	Bluecastle T.	6.08206	14.9077	0.356285	11.2563	0.123826	9.74	0.102182	9.98545	0.757056		1987.68	130.714	1964.54	190.672	2012.07	172.809	1966.48	187.983	2.36233	2012.07	172.809
062114-03_44	Price Canyon	Bluecastle T.	5.96978	13.6176	0.348437	9.74187	0.124261	9.47567	0.103298	11.221	0.718203		1971.45	118.974	1927.13	162.31	2018.29	167.996	1986.94	213.47	4.51672	2018.29	167.996
062114-03_242	Price Canyon	Bluecastle T.	8.58455	15.2581	0.378526	12.1336	0.164465	9.21138	0.109798	47.0381	0.79721		2294.92	139.637	2069.39	214.857	2502.09	155.018	2105.68	963.215	17.2935	2502.09	155.018
062114-03_126	Price Canyon	Bluecastle T.	9.1561	17.0149	0.392617	10.8982	0.169167	13.0369	0.0565291	25.8317	0.642598		2353.73	156.995	2134.96	198.128	2549.42	218.362	1111.45	281.305	16.2572	2549.42	218.362
062114-03_139	Price Canyon	Bluecastle T.	11.1804	12.3355	0.44849	8.42721	0.180844	8.96203	0.124266	8.93279	0.687151		2538.28	115.464	2388.54	168.243	2660.63	148.499	2367.46	200.556	10.2266	2660.63	148.499
062114-03_06	Price Canyon	Bluecastle T.	13.1482	12.3478	0.508817	8.66205	0.187482	8.76471	0.134565	10.4373	0.704392		2690.35	117.032	2651.58	188.36	2720.19	144.421	2551.78	251.772	2.52249	2720.19	144.421
062114-03_179	Price Canyon	Bluecastle T.	12.9343	15.4611	0.495323	11.6634	0.189456	10.1122	0.149431	9.90135	0.756462		2674.88	146.736	2593.66	249.18	2737.45	166.36	2814.9	261.865	5.2525	2737.45	166.36
062114-03_125	Price Canyon	Bluecastle T.	12.7869	10.7786	0.464612	7.8131	0.199637	7.37281	0.111911	7.58309	0.729472		2664.08	101.846	2459.89	159.808	2823.23	120.36	2144.12	154.855	12.8698	2823.23	120.36
150413-04_125	Price Canyon	Bluecastle T.	0.370537	4.52027	0.0501011	1.65301	0.0536393	4.20719			0.365688		320.051	12.4091	315.142	5.08404	355.933	94.9662			1.53382	315.142	5.08404
150413-04_73	Price Canyon	Bluecastle T.	0.441915	12.392	0.061564	2.60159	0.0520608	12.1158			0.209941		371.602	38.5676	385.13	9.72608	288.074	277.099			-3.64048	385.13	9.72608
150413-04_33	Price Canyon	Bluecastle T.	0.527372	4.85797	0.068966	3.34972	0.0554601	3.51841			0.689531		430.064	17.032	429.923	13.9315	430.795	78.4155			0.0326992	429.923	13.9315
150413-04_118	Price Canyon	Bluecastle T.	0.551879	10.5503	0.0708103	6.41168	0.0565257	8.3785			0.607725		446.227	38.1006	441.036	27.3322	473.087	185.473			1.16334	441.036	27.3322
150413-04_83	Price Canyon	Bluecastle T.	0.818572	24.2248	0.0922397	11.4585	0.0643632	21.3434			0.473009		607.252	110.827	568.77	62.3807	753.568	451.733			6.33708	568.77	62.3807
150413-04_77	Price Canyon	Bluecastle T.	0.856042	13.3327	0.0990863	3.56831	0.0626585	12.8463			0.267637		627.96	62.4584	609.052	20.7378	696.641	274.006			12.573	609.052	20.7378
150413-04_21	Price Canyon	Bluecastle T.	1.49201	10.177	0.155609	4.15828	0.06954	9.28872			0.408596		927.135	61.888	932.33	36.0959	914.82	191.187			-1.914	932.33	36.0959
150413-04_115	Price Canyon	Bluecastle T.	1.52995	4.23684	0.156029	3.05428	0.0711166	2.93636			0.720886		942.478	26.0172	934.67	26.5744	960.787	60.0325			2.71826	934.67	26.5744
150413-04_84	Price Canyon	Bluecastle T.	1.58867	2.9713	0.160655	2.05779	0.0717197	2.1434			0.692553		965.776	18.516	960.416	18.3616	978.001	43.6749			1.79803	960.416	18.3616
150413-04_106	Price Canyon	Bluecastle T.	1.63278	10.5069	0.163494	7.06924	0.072431	7.77311			0.672818		982.93	66.1868	976.163	64.0371	998.055	157.94			2.19341	976.163	64.0371
150413-04_116	Price Canyon	Bluecastle T.	1.62508	4.0614	0.165602	3.88089	0.0711714	1.19737			0.955554		979.957	25.5306	987.836	35.544	962.361	24.4577			-2.6472	987.836	35.544
150413-04_78	Price Canyon	Bluecastle T.	1.70798	5.31789	0.168343	1.96386	0.0735843	4.94198			0.369294		1011.53	34.0602	1002.98	18.2413	1030.07	99.9585			2.63021	1002.98	18.2413
150413-04_5	Price Canyon	Bluecastle T.	1.73209	13.3339	0.169362	4.66836	0.0741743	12.49			0.350112		1020.53	85.8858	1008.6	43.5864	1046.23	252.113			3.59744	1008.6	43.5864
150413-04_72	Price Canyon	Bluecastle T.	1.73095	2.41232	0.170308	1.69176	0.0737136	1.71966			0.701302		1020.1	15.5254	1013.81	15.8706	1033.62	34.7843			1.91673	1013.81	15.8706
150413-04_94	Price Canyon	Bluecastle T.	1.76291	1.49728	0.171769	1.21851	0.0744362	0.870103			0.813816		1031.92	9.70062	1021.85	11.5146	1053.34	17.5675			2.98895	1021.85	11.5146
150413-04_35	Price Canyon	Bluecastle T.	1.78009	3.62542	0.174007	2.12453	0.074195	2.9377			0.586009		1038.21	23.5717	1034.15	20.2991	1046.8	59.2775			1.208	1034.15	20.2991
150413-04_46	Price Canyon	Bluecastle T.	1.80577	5.67136	0.175102	3.37342	0.0747945	4.55899			0.594817		1047.55	37.066	1040.16	32.4046	1063	91.7179			2.14861	1040.16	32.4046
150413-04_68	Price Canyon	Bluecastle T.	1.89001	3.00624	0.176143	2.63743	0.0778208	1.44271			0.87732		1077.58	19.9633	1045.87	25.4628	1142.3	28.6434			8.44158	1045.87	25.4628
150413-04_34	Price Canyon	Bluecastle T.	1.80952	3.79894	0.17758	3.2446	0.0739041	1.97598			0.854081		1048.9	24.8453	1053.74	31.5416	1038.83	39.9319			-1.43514	1053.74	31.5416
150413-04_3	Price Canyon	Bluecastle T.	1.82806	6.28531	0.178654	3.29459	0.0742125	5.35265			0.524172		1055.58	41.259	1059.62	32.1919	1047.27	107.984			-1.1789	1059.62	32.1919
150413-04_14	Price Canyon	Bluecastle T.	1.87127	3.56435	0.178674	1.88569	0.075958	3.02469			0.529043		1070.98	23.588	1059.73	18.4271	1093.98	60.566			3.13135	1059.73	18.4271
150413-04_113	Price Canyon	Bluecastle T.	1.86124	7.35415	0.180948	4.70462	0.0746017	5.65243			0.639724		1067.43	48.584	1072.15	46.4695	1057.81	113.815			-1.35567	1072.15	46.4695
150413-04_92	Price Canyon	Bluecastle T.	1.87295	4.7526	0.181141	3.69459	0.0749908	2.98951			0.777383		1071.57	31.4625	1073.2	36.5258	1068.27	60.1291			-0.461542	1073.2	36.5258
150413-04_90	Price Canyon	Bluecastle T.	1.91729	5.0367	0.182299	3.69642	0.0762784	3.42123			0.733897		1087.13	33.6143	1079.52	36.7416	1102.41	68.422			2.07588	1079.52	36.7416
150413-04_28	Price Canyon	Bluecastle T.	1.88239	9.52996	0.182416	5.48518	0.0748424	7.79314			0.575572		1074.91	63.2148	1080.16	54.5511	1064.29	156.812			-1.4909	1080.16	54.5511
150413-04_79	Price Canyon	Bluecastle T.	1.89984	4.63568	0.18259	4.38195	0.0754641	1.51262			0.945266		1081.03	30.8404	1081.11	43.6144	1080.89	30.3477			-0.0196514	1081.11	43.6144
150413-04_107	Price Canyon	Bluecastle T.	1.91357	6.6342	0.182976	3.63429	0.0758489	5.55018			0.547811		1085.83	44.2492	1083.21	36.2373	1091.07	111.199			0.719992	1083.21	36.2373
150413-04_87	Price Canyon	Bluecastle T.	1.93526	2.97126	0.183203	2.42832	0.0766136	1.7122			0.81727		1093.36	19.8919	1084.45	24.238	1111.13	34.198			2.40149	1084.45	24.238
150413-04_98	Price Canyon	Bluecastle T.	1.91999	7.15092	0.18356	6.5035	0.075861	2.97324			0.909463		1088.06	47.7517	1086.39	65.0215	1091.39	59.5582			0.457469	1086.39	65.0215
150413-04_1	Price Canyon	Bluecastle T.	1.91382	5.64358	0.183626	4.38147	0.0755903	3.55706			0.776365		1085.92	37.642	1086.75	43.8186	1084.26	71.3303			-0.229709	1086.75	43.8186
150413-04_19	Price Canyon	Bluecastle T.	1.92647	5.69686	0.184522	5.66508	0.0757207	0.600857			0.994422		1090.32	38.0833	1091.63	56.8895	1087.71	12.0794			-0.360098	1091.63	56.8895
150413-04_51	Price Canyon	Bluecastle T.	1.97919	4.34688	0.184763	2.12184	0.0776912	3.79383			0.488129		1108.44	29.3243	1092.94	21.3312	1139.01	75.5034			4.04409	1092.94	21.3312
150413-04_111	Price Canyon	Bluecastle T.	1.93351	4.46588	0.185207	4.10885	0.0757164	1.74971			0.920053		1092.76	29.8901	1095.36	41.3907	1087.56	35.03			-0.71658	1095.36	41.3907
150413-04_43	Price Canyon	Bluecastle T.	1.94014	4.0046	0.186513	3.32626	0.0754439	2.22998			0.830609		1095.05	26.8336	1102.46	33.7063	1080.37	44.7306			-2.0439	1102.46	33.7063
150413-04_25	Price Canyon	Bluecastle T.	1.98361	6.84778	0.187053	3.85292	0.0769112	5.66102			0.562653		1109.95	46.2348	1105.39	39.1386	1118.9	112.953			1.2076	1105.39	39.1386
150413-04_13	Price Canyon	Bluecastle T.	1.9576	6.29021	0.18841	3.88548	0.0753558	4.9467			0.617702		1101.06	42.2807	1112.76	39.7102	1077.99	99.3353			-3.22516	1112.76	39.7102
150413-04_91	Price Canyon	Bluecastle T.	1.99211	5.01996	0.189049	4.69712	0.0764252	1.77117			0.935689		1112.84	33.9395	1116.22	48.1423	1106.22	35.3755			-0.904574	1116.22	48.1423
150413-04_105	Price Canyon	Bluecastle T.	2.04099	3.90322	0.189467	3.33252	0.0781277	2.03209			0.853788		1129.29	26.6013	1118.49	34.2195	1150.12	40.3533			2.75024	1118.49	34.2195
150413-04_70	Price Canyon	Bluecastle T.	1.96888	5.67825	0.189931	4.77218	0.0751833	3.07714			0.840432		1104.92	38.2404	1121	49.1034	1073.42	61.818			-4.43234	1121	49.1034
150413-04_53	Price Canyon	Bluecastle T.	2.03548	3.98774	0.192002	3.78735	0.0768882	1.24821			0.949749		1127.45	27.1533	1132.21	39.3264	1118.31	24.881			-1.24321	1132.21	39.3264
150413-04_12	Price Canyon	Bluecastle T.	2.29804	5.12432	0.20636	4.79949	0.0807665	1.79544			0.936609		1211.69	36.2589	1209.4	52.9254	1215.79	35.3337			0.525685	1215.79	35.3337
150413-04_32	Price Canyon	Bluecastle T.	2.30237	3.36232	0.206463	3.34636	0.0808781	0.327208			0.995254		1213.02	23.8033	1209.95	36.9165	1218.47	6.398			0.699184	1218.47	6.398
150413-04_119	Price Canyon	Bluecastle T.	2.33043	6.74449	0.208693	4.94673	0.0809892	4.58454			0.733448		1221.61	47.9287	1221.85	55.0593	1221.18	90.1124			-0.0545196	1221.18	90.1124
150413-04_18	Price Canyon	Bluecastle T.	2.48755	9.99714	0.220743	3.92903	0.0817304	9.19269			0.393015		1268.42	72.4338	1285.8	45.8003	1239.07	180.259			-3.77144	1239.07	180.259
150413-04_89	Price Canyon	Bluecastle T.	2.38668	4.27149	0.210424	3.37643	0.0822618	2.61636			0.790458		1238.62	30.5676	1231.08	37.8386	1251.75	51.1971			1.65156	1251.75	51.1971
150413-04_64	Price Canyon	Bluecastle T.	2.32333	4.77435	0.204787	2.48994	0.0822824	4.07365			0.521524		1219.44	33.8939	1200.98	27.2834	1252.23	79.7122			4.09229	1252.23	79.7122
150413-04_55	Price Canyon	Bluecastle T.	2.44482	4.11818	0.214015	3.48243	0.0828518	2.1982			0.845623		1255.9	29.6788	1250.17	39.575	1265.71	42.9282			1.22753	1265.71	42.9282
150413-04_47	Price Canyon	Bluecastle T.	2.60181	3.67409	0.225059	2.73753	0.0838449	2.45048			0.745091		1301.15	26.9501	1308.55	32.4204	1288.94	47.6977			-1.52172	1288.94	47.6977
150413-04_59	Price Canyon	Bluecastle T.	2.72101	2.22924	0.231345	2.07956	0.0853042	0.803083			0.932856		1334.21	16.5526	1341.54	25.1867	1322.44	15.5589			-1.44419	1322.44	15.5589
150413-04_7	Price Canyon	Bluecastle T.	2.67454	3.52001	0.226497	3.43633	0.0856418	0.762948			0.976228		1321.45	26.0162	1316.11	40.9082	1330.09	14.7639			1.05105	1330.09	14.7639
150413-04_112	Price Canyon	Bluecastle T.	2.71828	3.75865	0.229875	3.26162	0.0857634	1.86795			0.867765		1333.46	27.9024	1333.84	39.2992	1332.84	36.1355			-0.0754512	1332.84	36.1355
150413-04_97	Price Canyon	Bluecastle T.	2.74982	5.24108	0.231765	4.82928	0.0860506	2.03641			0.921428		1342.04	39.0299	1343.75	58.5766	1339.3	39.3567			-0.331763	1339.3	39.3567
150413-04_23	Price Canyon	Bluecastle T.	2.74574	4.99189	0.228448	4.81933	0.0871708	1.30117			0.965431		1340.93	37.1591	1326.36	57.7747	1364.25	25.0611			2.77784	1364.25	25.0611
150413-04_45	Price Canyon	Bluecastle T.	2.90545	3.72695	0.241221	3.35297	0.0873569	1.62718			0.899656		1383.33	28.1549	1393.04	42.0064	1368.36	31.3221			-1.80338	1368.36	31.3221
150413-04_93	Price Canyon	Bluecastle T.	2.77713	2.92622	0.230466	1.53535	0.0873951	2.49107			0.524688		1349.41	21.8468	1336.94	18.5381	1369.21	47.9453			2.35632	1369.21	47.9453
150413-04_61	Price Canyon	Bluecastle T.	2.8532	3.09352	0.23671	2.04007	0.0874206	2.32551			0.659464		1369.65	23.2602	1369.57	25.1717	1369.77	44.7553			0.0141342	1369.77	44.7553
150413-04_95	Price Canyon	Bluecastle T.	2.96433	10.9189	0.245883	10.3213	0.0874373	3.56272			0.94527		1398.52	82.9483	1417.21	131.317	1370.13	68.5664			-3.43585	1370.13	68.5664
150413-04_29	Price Canyon	Bluecastle T.	2.91002	3.82766	0.241304	3.29698	0.087464	1.94446			0.861356		1384.52	28.9274	1393.47	41.3164	1370.72	37.417			-1.65988	1370.72	37.417
150413-04_76	Price Canyon	Bluecastle T.	2.85702	5.41435	0.236472	4.58611	0.0876259	2.87798			0.847029		1370.66	40.7283	1368.33	56.5407	1374.28	55.354			0.43271	1374.28	55.354
150413-04_109	Price Canyon	Bluecastle T.	2.78049	2.63887	0.229877	0.809966	0.0877253	2.51149			0.306937		1350.31	19.7077	1333.85	9.75931	1376.46	48.2905			3.09531	1376.46	48.2905
150413-04_117	Price Canyon	Bluecastle T.	2.8487	6.32258	0.234937	3.8084	0.0879414	5.04689			0.60235		1368.47	47.5266	1360.32	46.7057	1381.19	96.9885			1.51053	1381.19	96.9885
150413-04_24	Price Canyon	Bluecastle T.	2.85958	6.25037	0.233779	2.09801	0.0887145	5.88774			0.335661		1371.33	47.03	1354.27	25.6268	1397.99	112.894			3.12677	1397.99	112.894
150413-04_82	Price Canyon	Bluecastle T.	3.09157	6.42715	0.251491	5.50195	0.0891568	3.32216			0.856049		1430.6	49.3199	1446.16	71.2745	1407.51	63.6063			-2.74587	1407.51	63.6063
150413-04_38	Price Canyon	Bluecastle T.	3.15588	6.51546	0.255514	4.96845	0.0895786	4.21494			0.762564		1446.44	50.2483	1466.85	65.1834	1416.54	80.6039			-3.55161	1416.54	80.6039
150413-04_121	Price Canyon	Bluecastle T.	3.00795	8.6973	0.242768	4.77005	0.0898626	7.27252			0.548453		1409.64	66.3005	1401.07	60.0683	1422.59	138.993			1.51296	1422.59	138.993
150413-04_10	Price Canyon	Bluecastle T.	3.0986	4.30564	0.249741	3.71236	0.089986	2.18105			0.862207		1432.35	33.0549	1437.14	47.8233	1425.21	41.6567			-0.836742	1425.21	41.6567
150413-04_4	Price Canyon	Bluecastle T.	3.13623	3.63637	0.250711	3.42734	0.0907263	1.21513			0.942517		1441.63	27.9981	1442.14	44.2888	1440.84	23.1587			-0.0901625	1440.84	23.1587
150413-04_44	Price Canyon	Bluecastle T.	3.22354	3.87913	0.256373	3.72686	0.0911925	1.07617			0.960747		1462.83	30.0644	1471.26	49.025	1450.61	20.4833			-1.42365	1450.61	20.4833
150413-04_122	Price Canyon	Bluecastle T.	3.13112	4.48324	0.24684	3.49149	0.0919989	2.81228			0.778787		1440.37	34.506	1422.16	44.5589	1467.35	53.4095			3.07957	1467.35	53.4095
150413-04_2	Price Canyon	Bluecastle T.	3.08127	4.81137	0.24215	1.15982	0.0922878	4.66949			0.241057		1428.04	36.8877	1397.87	14.5753	1473.3	88.6172			5.11996	1473.3	88.6172
150413-04_62	Price Canyon	Bluecastle T.	3.21266	4.40796	0.251314	4.06181	0.0927141	1.71224			0.921473		1460.22	34.1363	1445.25	52.5886	1482.04	32.4529			2.48221	1482.04	32.4529
150413-04_99	Price Canyon	Bluecastle T.	3.20709	6.42213	0.250649	6.14811	0.092799	1.85595			0.957331		1458.87	49.7193	1441.82	79.4321	1483.77	35.1687			2.8272	1483.77	35.1687
150413-04_60	Price Canyon	Bluecastle T.	3.87053	5.89992	0.281115	5.52012	0.0998588	2.08262			0.935626		1607.56	47.6157	1596.97	78.085	1621.44	38.7531			1.50868	1621.44	38.7531
150413-04_57	Price Canyon	Bluecastle T.	3.98347	2.99687	0.285889	1.12711	0.101056	2.77684			0.376095		1630.83	24.3247	1620.95	16.1539	1643.58	51.5227			1.37697	1643.58	51.5227
150413-04_41	Price Canyon	Bluecastle T.	4.20099	2.62322	0.298249	2.5327	0.102158	0.683135			0.965496		1674.21	21.5152	1682.62	37.5081	1663.67	12.6403			-1.13874	1663.67	12.6403
150413-04_81	Price Canyon	Bluecastle T.	4.16842	4.79558	0.29579	4.76391	0.102208	0.55017			0.993397		1667.83	39.277	1670.4	70.1027	1664.59	10.1781			-0.348775	1664.59	10.1781
150413-04_39	Price Canyon	Bluecastle T.	3.35357	6.66392	0.237932	6.59059	0.102224	0.985873			0.988996		1493.63	52.1335	1375.94	81.659	1664.88	18.2407			17.3552	1664.88	18.2407
150413-04_20	Price Canyon	Bluecastle T.	4.19822	3.59379	0.294249	3.55348	0.103478	0.536751			0.988784		1673.67	29.4729	1662.73	52.0801	1687.41	9.90438			1.46268	1687.41	9.90438
150413-04_100	Price Canyon	Bluecastle T.	4.05654	5.14437	0.282812	4.59799	0.10403	2.30716			0.893792		1645.61	41.9108	1605.51	65.3469	1697.21	42.518			5.40287	1697.21	42.518
150413-04_27	Price Canyon	Bluecastle T.	4.4067	4.57145	0.306918	4.39115	0.104133	1.27119			0.96056		1713.6	37.8369	1725.52	66.4775	1699.04	23.4188			-1.55859	1699.04	23.4188
150413-04_120	Price Canyon	Bluecastle T.	4.42072	4.68856	0.306981	4.09197	0.104443	2.28874			0.872757		1716.23	38.8292	1725.83	61.9578	1704.51	42.1397			-1.25071	1704.51	42.1397
150413-04_11	Price Canyon	Bluecastle T.	4.45551	4.71036	0.308344	4.64559	0.1048	0.778427			0.98625		1722.73	39.0661	1732.55	70.5793	1710.79	14.3217			-1.27217	1710.79	14.3217
150413-04_17	Price Canyon	Bluecastle T.	4.40704	4.11976	0.30447	3.87486	0.104979	1.39924			0.940555		1713.66	34.0981	1713.44	58.3025	1713.93	25.73			0.0285285	1713.93	25.73
150413-04_85	Price Canyon	Bluecastle T.	4.27605	5.9075	0.293877	3.79415	0.10553	4.52803			0.642259		1688.76	48.624	1660.87	55.553	1723.55	83.1772			3.63654	1723.55	83.1772
150413-04_108	Price Canyon	Bluecastle T.	4.45818	4.37157	0.306379	3.72738	0.105535	2.28415			0.852639		1723.22	36.2596	1722.86	56.3526	1723.64	41.9504			0.0450539	1723.64	41.9504
150413-04_26	Price Canyon	Bluecastle T.	4.51016	5.43098	0.309152	4.33205	0.105808	3.2755			0.797655		1732.85	45.1448	1736.53	65.9472	1728.38	60.127			-0.471304	1728.38	60.127
150413-04_123	Price Canyon	Bluecastle T.	4.45589	5.36439	0.30395	4.00977	0.106324	3.56349			0.747478		1722.8	44.4927	1710.87	60.2534	1737.31	65.3454			1.52183	1737.31	65.3454
150413-04_52	Price Canyon	Bluecastle T.	4.5403	5.14435	0.307835	4.96782	0.106971	1.33609			0.965684		1738.39	42.813	1730.04	75.3796	1748.42	24.4626			1.05083	1748.42	24.4626
150413-04_69	Price Canyon	Bluecastle T.	4.59886	3.34706	0.311547	3.27774	0.107059	0.677647			0.97929		1749.06	27.9172	1748.32	50.1921	1749.93	12.4065			0.0923987	1749.93	12.4065
150413-04_8	Price Canyon	Bluecastle T.	4.63601	3.36978	0.313953	3.30222	0.107097	0.671419			0.979949		1755.78	28.147	1760.13	50.8641	1750.58	12.2915			-0.545692	1750.58	12.2915
150413-04_114	Price Canyon	Bluecastle T.	4.61772	4.69404	0.311447	4.68696	0.107533	0.257703			0.998492		1752.48	39.183	1747.82	71.7542	1758.01	4.71331			0.579379	1758.01	4.71331
150413-04_36	Price Canyon	Bluecastle T.	4.77052	3.71227	0.321428	3.69218	0.107642	0.385686			0.994588		1779.72	31.164	1796.7	57.8954	1759.86	7.05247			-2.0937	1759.86	7.05247
150413-04_102	Price Canyon	Bluecastle T.	4.5893	3.36359	0.307579	2.98632	0.108215	1.54779			0.887836		1747.33	28.0446	1728.78	45.2841	1769.57	28.2647			2.30464	1769.57	28.2647
150413-04_67	Price Canyon	Bluecastle T.	4.70333	3.06631	0.314437	2.78082	0.108485	1.29203			0.906892		1767.83	25.6771	1762.5	42.883	1774.12	23.5802			0.654936	1774.12	23.5802
150413-04_103	Price Canyon	Bluecastle T.	4.73112	6.18259	0.315646	5.16046	0.108708	3.405			0.834676		1772.77	51.8345	1768.43	79.8129	1777.87	62.1244			0.530763	1777.87	62.1244
150413-04_124	Price Canyon	Bluecastle T.	4.59115	10.8355	0.306141	3.63461	0.108767	10.2077			0.335435		1747.66	90.4035	1721.69	54.9173	1778.86	186.321			3.21402	1778.86	186.321
150413-04_110	Price Canyon	Bluecastle T.	4.72387	3.99999	0.314423	3.41601	0.108964	2.08106			0.854004		1771.48	33.5225	1762.44	52.6768	1782.15	37.9458			1.10593	1782.15	37.9458
150413-04_75	Price Canyon	Bluecastle T.	4.83653	2.64283	0.32099	2.37283	0.10928	1.16373			0.897834		1791.28	22.238	1794.56	37.1687	1787.43	21.2035			-0.398885	1787.43	21.2035
150413-04_63	Price Canyon	Bluecastle T.	4.88573	4.12446	0.324148	4.00737	0.109316	0.97578			0.971611		1799.8	34.7671	1809.95	63.2394	1788.04	17.7771			-1.22581	1788.04	17.7771
150413-04_96	Price Canyon	Bluecastle T.	4.77773	2.9579	0.316034	2.87716	0.109644	0.686395			0.972703		1780.99	24.837	1770.33	44.5401	1793.49	12.4991			1.29118	1793.49	12.4991
150413-04_15	Price Canyon	Bluecastle T.	4.5902	4.38746	0.302528	2.92971	0.110044	3.26597			0.667747		1747.49	36.5842	1703.83	43.8655	1800.11	59.4204			5.34824	1800.11	59.4204
150413-04_31	Price Canyon	Bluecastle T.	4.84481	5.7562	0.318115	5.10346	0.110457	2.66244			0.886601		1792.71	48.4568	1780.52	79.3997	1806.92	48.4007			1.46132	1806.92	48.4007
150413-04_101	Price Canyon	Bluecastle T.	4.8519	8.03573	0.317518	6.03542	0.110826	5.30535			0.751073		1793.94	67.6754	1777.6	93.766	1812.99	96.3838			1.95209	1812.99	96.3838
150413-04_66	Price Canyon	Bluecastle T.	5.07471	3.47584	0.328271	3.24756	0.112119	1.23886			0.934325		1831.89	29.4853	1829.99	51.7396	1834.02	22.4479			0.219613	1834.02	22.4479
150413-04_40	Price Canyon	Bluecastle T.	5.23492	3.19529	0.337951	3.15705	0.112346	0.492847			0.988033		1858.32	27.2424	1876.8	51.4062	1837.69	8.92618			-2.12855	1837.69	8.92618
150413-04_86	Price Canyon	Bluecastle T.	5.17918	3.57865	0.334018	3.22628	0.112458	1.54849			0.901537		1849.2	30.4587	1857.83	52.0753	1839.49	28.0396			-0.996816	1839.49	28.0396
150413-04_104	Price Canyon	Bluecastle T.	5.05549	2.21162	0.322836	1.89243	0.113574	1.14454			0.855676		1828.67	18.7485	1803.57	29.7725	1857.36	20.6764			2.89612	1857.36	20.6764
150413-04_74	Price Canyon	Bluecastle T.	5.43399	4.62569	0.344322	4.27032	0.11446	1.77803			0.923175		1890.23	39.6735	1907.43	70.5089	1871.38	32.0724			-1.92626	1871.38	32.0724
150413-04_88	Price Canyon	Bluecastle T.	5.20943	5.91344	0.327996	2.61669	0.115192	5.30299			0.442499		1854.16	50.3846	1828.66	41.6624	1882.87	95.5282			2.87917	1882.87	95.5282
150413-04_49	Price Canyon	Bluecastle T.	5.56766	3.38971	0.349836	3.2263	0.115427	1.03976			0.951794		1911.11	29.1799	1933.81	53.9025	1886.55	18.717			-2.50551	1886.55	18.717
150413-04_50	Price Canyon	Bluecastle T.	5.53411	4.14955	0.343651	3.06496	0.116796	2.79729			0.738623		1905.91	35.6892	1904.21	50.5331	1907.75	50.2326			0.185452	1907.75	50.2326
150413-04_22	Price Canyon	Bluecastle T.	5.59184	3.78828	0.345672	3.67473	0.117325	0.920549			0.970026		1914.84	32.633	1913.9	60.8516	1915.85	16.5167			0.101643	1915.85	16.5167
150413-04_37	Price Canyon	Bluecastle T.	5.76731	5.09789	0.354707	5.0923	0.117924	0.238702			0.998903		1941.52	44.121	1957.03	85.9533	1924.99	4.27417			-1.6647	1924.99	4.27417
150413-04_65	Price Canyon	Bluecastle T.	6.75161	2.6518	0.380827	2.51259	0.128582	0.847911			0.947502		2079.4	23.4534	2080.14	44.6714	2078.65	14.9246			-0.0717374	2078.65	14.9246
150413-04_56	Price Canyon	Bluecastle T.	9.39903	5.03396	0.390438	5.01204	0.174594	0.469253			0.995646		2377.74	46.2067	2124.86	90.7278	2602.16	7.82147			18.3425	2602.16	7.82147
150413-04_30	Price Canyon	Bluecastle T.	11.5095	7.08443	0.464207	5.01619	0.179822	5.0027			0.708058		2565.35	66.2072	2458.11	102.52	2651.22	82.9931			7.28385	2651.22	82.9931
150413-04_48	Price Canyon	Bluecastle T.	13.026	2.98401	0.51263	2.94713	0.184292	0.467657			0.987643		2681.54	28.1407	2667.85	64.3861	2691.86	7.72206			0.892099	2691.86	7.72206
062114-07_281	Price Canyon	U. Castlegate	0.152132	25.6865	0.0148622	9.99498	0.0742371	23.6409	0.00644567	29.4043	0.391077		143.792	34.4524	95.103	9.43576	1047.92	476.631	129.863	38.0989	33.8609	95.103	9.43576
062114-07_155	Price Canyon	U. Castlegate	0.117508	20.8977	0.0155006	14.4985	0.0549808	15.0348	0.00442789	20.5016	0.694547		112.81	22.316	99.1567	14.2662	411.444	336.151	89.2999	18.2758	12.1033	99.1567	14.2662
062114-07_198	Price Canyon	U. Castlegate	0.164274	20.8241	0.023074	12.9977	0.0516943	16.2136	0.00603729	40.7414	0.62753		154.438	29.8425	147.054	18.8973	271.912	371.593	121.66	49.4778	4.78078	147.054	18.8973
062114-07_127	Price Canyon	U. Castlegate	0.388404	17.6443	0.0363188	12.6648	0.0775729	12.2577	0.0123137	15.6214	0.71929		333.203	50.1599	229.974	28.6125	1135.96	243.906	247.368	38.4433	30.9807	229.974	28.6125
062114-07_07	Price Canyon	U. Castlegate	0.356388	17.3367	0.0445173	11.9846	0.0579761	12.546	0.0135196	15.5063	0.690148		309.515	46.2845	280.773	32.9276	528.86	274.902	271.431	41.8508	9.28607	280.773	32.9276
062114-07_166	Price Canyon	U. Castlegate	0.368359	16.3307	0.0451977	10.3826	0.0591204	12.5646	0.0208951	15.643	0.638796		318.436	44.6669	284.971	28.943	571.533	273.314	417.984	64.8178	10.5093	284.971	28.943
062114-07_266	Price Canyon	U. Castlegate	0.3378	11.4126	0.0469195	7.97574	0.0522232	8.14677	0.0150199	12.7823	0.700308		295.503	29.2686	295.581	23.0426	295.194	185.926	301.328	38.2671	-0.0263493	295.581	23.0426
062114-07_14	Price Canyon	U. Castlegate	0.383949	19.986	0.0491605	11.702	0.0566978	16.1547	0.0131144	16.6085	0.588781		329.939	56.3579	309.366	35.3474	479.797	356.979	263.349	43.5014	6.23565	309.366	35.3474
062114-07_150	Price Canyon	U. Castlegate	0.440418	20.1618	0.0548758	11.0155	0.0582052	16.8747	0.0176879	11.6785	0.547255		370.547	62.6739	344.387	36.9408	537.496	369.205	354.386	41.0679	7.05985	344.387	36.9408
062114-07_161	Price Canyon	U. Castlegate	0.438482	14.1732	0.0554202	10.3824	0.0573905	9.60376	0.0185322	10.6873	0.735434		369.181	43.8949	347.713	35.1448	506.57	211.24	371.149	39.3422	5.81508	347.713	35.1448
062114-07_128	Price Canyon	U. Castlegate	0.448375	15.9561	0.056931	11.0216	0.0571285	11.5053	0.0200073	12.2012	0.692876		376.141	50.1963	356.934	38.2711	496.496	253.506	400.4	48.4308	5.1062	356.934	38.2711
062114-07_238	Price Canyon	U. Castlegate	0.517278	13.8338	0.0584333	9.29601	0.0641987	10.2414	0.0210713	13.2031	0.672255		423.332	47.9239	366.09	33.0838	748.184	216.367	421.473	55.1464	13.5216	366.09	33.0838
062114-07_73	Price Canyon	U. Castlegate	0.467994	18.3348	0.0600339	11.1887	0.0565749	14.4768	0.0189734	15.9543	0.613657		389.802	59.4178	375.832	40.8489	475.002	320.094	379.903	60.1343	3.58403	375.832	40.8489
062114-07_295	Price Canyon	U. Castlegate	0.545864	13.7916	0.0606024	9.67239	0.0653735	9.78815	0.0234619	12.016	0.704493		442.283	49.4882	379.288	35.6282	786.38	205.53	468.739	55.7526	14.2433	379.288	35.6282
062114-07_63	Price Canyon	U. Castlegate	0.493893	14.7151	0.0612126	9.8089	0.0586185	10.9197	0.0212996	20.1503	0.670329		407.56	49.4369	382.996	36.4739	552.958	238.285	425.992	85.1195	6.02714	382.996	36.4739
062114-07_33	Price Canyon	U. Castlegate	0.503268	16.5172	0.0625453	11.6472	0.0583253	11.6742	0.0192623	29.3869	0.707425		413.912	56.2046	391.086	44.1972	542.004	255.225	385.632	112.564	5.51473	391.086	44.1972
062114-07_242	Price Canyon	U. Castlegate	0.644649	17.7214	0.0627787	11.9523	0.074471	13.0714	0.0342001	14.0239	0.675232		505.18	70.6443	392.502	45.514	1054.26	263.285	679.703	93.9538	22.3046	392.502	45.514
062114-07_98	Price Canyon	U. Castlegate	0.489646	14.6389	0.0634964	10.3882	0.0559262	10.2665	0.0188344	11.1172	0.712853		404.669	48.8959	396.854	39.9831	449.441	228.015	377.145	41.5821	1.93126	396.854	39.9831
062114-07_151	Price Canyon	U. Castlegate	0.491483	16.9613	0.0636082	11.1525	0.056037	12.7636	0.0208011	11.7424	0.658574		405.92	56.8108	397.532	42.996	453.836	283.257	416.123	48.4214	2.06658	397.532	42.996
062114-07_146	Price Canyon	U. Castlegate	0.521209	18.6336	0.0655148	11.1151	0.0576972	14.9369	0.0209832	12.0905	0.597846		425.959	64.9143	409.077	44.0571	518.284	327.884	419.728	50.2863	3.96331	409.077	44.0571
062114-07_110	Price Canyon	U. Castlegate	0.50767	18.8906	0.0668571	12.7148	0.0550845	13.9628	0.0180732	12.7758	0.673555		416.881	64.6753	417.193	51.3661	415.656	311.951	362.037	45.8933	-0.074773	417.193	51.3661
062114-07_173	Price Canyon	U. Castlegate	0.532477	12.106	0.0680682	8.43077	0.0567429	8.62828	0.0215287	9.27476	0.701459		433.452	42.736	424.507	34.6366	481.553	190.606	430.526	39.5466	2.06386	424.507	34.6366
062114-07_170	Price Canyon	U. Castlegate	0.525546	13.1145	0.0696344	9.18426	0.0547487	9.30318	0.0221724	13.8564	0.70484		428.85	45.9054	433.953	38.544	401.975	208.35	443.258	60.8424	-1.18999	433.953	38.544
062114-07_144	Price Canyon	U. Castlegate	0.545476	16.6288	0.070073	10.5745	0.0564561	12.8072	0.018129	11.9668	0.637827		442.028	59.6626	436.596	44.6398	470.349	283.407	363.146	43.1147	1.22909	436.596	44.6398
062114-07_240	Price Canyon	U. Castlegate	0.541375	16.2027	0.0702365	11.1552	0.0558979	11.7484	0.0219496	17.3302	0.688657		439.33	57.8464	437.58	47.194	448.315	260.977	438.852	75.3747	0.398386	437.58	47.194
062114-07_138	Price Canyon	U. Castlegate	0.620496	17.8551	0.0725315	11.7714	0.0620479	13.3714	0.0417056	25.8685	0.662708		490.158	69.5282	451.389	51.3183	675.761	285.845	825.86	210.424	7.90952	451.389	51.3183
062114-07_201	Price Canyon	U. Castlegate	0.566593	15.8926	0.0755127	10.1356	0.0544667	12.24	0.021531	27.0915	0.637843		455.809	58.4277	469.283	45.8752	390.398	274.683	430.571	115.745	-2.95602	469.283	45.8752
062114-07_196	Price Canyon	U. Castlegate	0.718529	20.4708	0.0886243	14.33	0.0588533	14.5695	0.022945	39.1018	0.702465		549.798	87.1195	547.396	75.2071	561.672	317.458	458.528	178.056	0.436886	547.396	75.2071
062114-07_58	Price Canyon	U. Castlegate	0.800871	19.4995	0.0896601	12.2375	0.0648357	15.1694	0.0246823	18.0309	0.628345		597.32	88.2727	553.526	64.9134	769.009	319.409	492.827	87.9777	7.33168	553.526	64.9134
062114-07_255	Price Canyon	U. Castlegate	0.79165	16.1013	0.089892	10.7263	0.0638733	11.9575	0.0299495	13.4545	0.669697		592.108	72.3609	554.898	57.0318	737.439	253.06	596.457	79.2328	6.28418	554.898	57.0318
062114-07_259	Price Canyon	U. Castlegate	0.948338	11.7887	0.0901801	8.13099	0.0762728	8.47545	0.0683581	12.9981	0.695084		677.237	58.3272	556.602	43.3592	1102.24	169.491	1336.49	168.803	17.8127	556.602	43.3592
062114-07_297	Price Canyon	U. Castlegate	0.814277	17.1896	0.0903597	13.0828	0.065386	11.1135	0.0281105	15.0303	0.762892		604.851	78.4924	557.664	69.8943	786.782	233.346	560.337	83.2349	7.80134	557.664	69.8943
062114-07_260	Price Canyon	U. Castlegate	0.780796	17.111	0.0911727	11.6295	0.0621147	12.5124	0.027878	14.0032	0.682114		585.938	76.3213	562.469	62.6418	678.06	267.381	555.765	76.911	4.00534	562.469	62.6418
062114-07_253	Price Canyon	U. Castlegate	0.87169	18.1151	0.095233	9.68148	0.066387	15.2703	0.0284462	12.7758	0.537988		636.484	85.8682	586.412	54.2689	818.601	319.012	566.935	71.5503	7.86712	586.412	54.2689
062114-07_81	Price Canyon	U. Castlegate	1.1144	16.2027	0.0963636	11.0179	0.0838407	11.8389	0.0308713	12.0686	0.682733		760.291	86.9224	593.063	62.4293	1288.86	230.422	614.539	73.1824	21.9953	593.063	62.4293
062114-07_244	Price Canyon	U. Castlegate	0.735454	15.4021	0.0970572	9.87489	0.0549558	11.7988	0.0283649	11.7736	0.64278		559.75	66.3696	597.14	56.3196	410.427	263.846	565.337	65.7449	-6.6798	597.14	56.3196
062114-07_197	Price Canyon	U. Castlegate	1.12819	16.1352	0.12363	11.1855	0.0662508	11.5592	0.0317889	41.171	0.69771		766.889	87.0639	751.421	79.3404	814.31	241.646	632.523	258.023	7.72305	751.421	79.3404
062114-07_187	Price Canyon	U. Castlegate	1.18801	15.0163	0.129773	11.0963	0.0663479	10.1591	0.0365827	22.9807	0.736409		795.037	82.9713	786.571	82.1702	817.37	212.276	726.214	164.595	3.76802	786.571	82.1702
062114-07_176	Price Canyon	U. Castlegate	1.2951	12.9407	0.133307	9.23488	0.0704633	9.01528	0.0346796	17.9403	0.717411		843.556	74.2785	806.705	70.0282	941.883	184.745	689.072	121.905	14.3518	806.705	70.0282
062114-07_154	Price Canyon	U. Castlegate	1.26125	20.5197	0.134912	14.6388	0.067801	14.3639	0.038833	19.128	0.714138		828.468	116.724	815.829	112.191	862.477	298.024	770.045	145.043	5.40871	815.829	112.191
062114-07_23	Price Canyon	U. Castlegate	1.28474	14.4927	0.134945	10.1768	0.0689904	10.2941	0.0393617	11.99	0.703907		838.96	82.9317	816.017	78.0072	898.453	212.401	780.328	91.9875	9.17533	816.017	78.0072
062114-07_153	Price Canyon	U. Castlegate	1.40199	14.3189	0.139374	11.0533	0.0729535	9.07932	0.0691914	19.1572	0.773268		889.777	85.0602	841.123	87.1675	1012.66	184.06	1352.25	252.144	16.9393	841.123	87.1675
062114-07_214	Price Canyon	U. Castlegate	1.38898	14.981	0.139565	11.9305	0.0721871	9.01475	0.0404242	21.3067	0.798692		884.262	88.6657	842.2	94.1983	991.22	183.33	800.98	168.022	15.034	842.2	94.1983
062114-07_132	Price Canyon	U. Castlegate	1.45415	15.9432	0.141228	11.8352	0.0746844	10.6067	0.0484345	17.1953	0.746608		911.59	96.208	851.6	94.4216	1060.02	213.455	956.001	161.201	19.6619	851.6	94.4216
062114-07_104	Price Canyon	U. Castlegate	1.49604	23.0832	0.148705	18.1145	0.0730098	14.2825	0.0785554	31.0211	0.785597		928.778	141.388	893.702	151.197	1014.23	289.474	1528.5	461.91	11.8833	893.702	151.197
062114-07_270	Price Canyon	U. Castlegate	1.58259	20.0728	0.150993	13.8066	0.0760203	14.5571	0.0512485	11.9736	0.68852		963.388	125.532	906.53	116.772	1095.6	291.399	1010.18	118.327	17.2576	906.53	116.772
062114-07_231	Price Canyon	U. Castlegate	1.60218	12.9139	0.15372	8.93327	0.0756042	9.27115	0.0597235	11.6848	0.696139		971.059	80.9056	921.782	76.7325	1084.61	185.891	1172.47	133.543	15.0125	921.782	76.7325
062114-07_156	Price Canyon	U. Castlegate	1.54794	18.3244	0.154253	13.4458	0.0727806	12.4301	0.0477432	12.7353	0.734756		949.672	113.509	924.759	115.847	1007.85	252.166	942.668	117.637	8.24444	924.759	115.847
062114-07_20	Price Canyon	U. Castlegate	1.56314	16.2407	0.154401	11.4087	0.0735175	11.5027	0.0419674	12.5497	0.70596		955.713	100.899	925.586	98.3745	1028.25	232.655	830.939	102.425	9.98458	925.586	98.3745
062114-07_199	Price Canyon	U. Castlegate	1.46556	15.4872	0.154458	11.0294	0.068902	10.782	0.0343202	39.4785	0.717883		916.3	93.7392	925.906	95.1333	895.808	222.559	682.049	266.52	-3.35988	925.906	95.1333
062114-07_276	Price Canyon	U. Castlegate	1.46195	14.4154	0.155286	9.9627	0.0682767	10.3801	0.0486187	10.8171	0.69391		914.814	87.1316	930.528	86.3306	876.964	214.886	959.551	101.625	-6.10791	930.528	86.3306
062114-07_262	Price Canyon	U. Castlegate	1.54626	15.8047	0.156186	10.4058	0.0718162	11.8857	0.0505541	12.2834	0.659121		949.004	97.7539	935.547	90.6224	980.736	242.092	996.822	119.828	4.60764	935.547	90.6224
062114-07_186	Price Canyon	U. Castlegate	1.48899	15.0887	0.157926	10.5583	0.0683297	10.8193	0.0391395	21.5961	0.697029		925.906	91.904	945.241	92.8359	878.571	223.923	776.008	165.084	-7.58849	945.241	92.8359
062114-07_04	Price Canyon	U. Castlegate	1.73186	15.7818	0.163231	10.8325	0.07688	11.4514	0.0408252	11.3095	0.688114		1020.44	101.929	974.708	97.9984	1118.08	228.464	808.77	89.8618	12.8229	974.708	97.9984
062114-07_135	Price Canyon	U. Castlegate	1.70015	15.6158	0.163964	10.7058	0.0752086	11.298	0.0484427	11.5762	0.690345		1008.59	100.161	978.766	97.2247	1074.08	226.887	956.158	108.4	8.87413	978.766	97.2247
062114-07_112	Price Canyon	U. Castlegate	1.64198	20.7558	0.164612	15.0488	0.0723341	14.2734	0.050664	15.6068	0.72601		986.474	131.715	982.355	137.14	995.356	290.097	998.936	152.688	1.30616	982.355	137.14
062114-07_237	Price Canyon	U. Castlegate	1.71149	13.9021	0.165978	9.60993	0.0747805	10.041	0.0440061	12.4945	0.691621		1012.84	89.3298	989.913	88.1913	1062.61	201.992	870.445	106.731	6.84122	989.913	88.1913
062114-07_298	Price Canyon	U. Castlegate	1.74697	13.3081	0.16697	9.62469	0.0758957	9.14903	0.0531407	11.3764	0.726209		1026.04	86.1422	995.394	88.7791	1092.32	183.232	1046.53	116.361	8.87337	995.394	88.7791
062114-07_60	Price Canyon	U. Castlegate	1.78406	15.9507	0.16793	10.7733	0.0771323	11.7414	0.0453284	13.9538	0.676868		1039.66	104.15	1000.69	99.8647	1124.61	234.025	896.031	122.671	11.0187	1000.69	99.8647
062114-07_43	Price Canyon	U. Castlegate	1.81206	18.099	0.168065	12.7272	0.0782056	12.8344	0.0496875	14.5382	0.705087		1049.82	118.963	1001.44	118.062	1152.1	254.774	980.141	139.576	13.0772	1001.44	118.062
062114-07_247	Price Canyon	U. Castlegate	1.75229	13.7236	0.170721	9.45867	0.0744421	9.90647	0.0439728	11.0377	0.692051		1028.01	88.9447	1016.08	88.9218	1053.48	199.56	869.802	94.1892	3.54989	1016.08	88.9218
062114-07_77	Price Canyon	U. Castlegate	1.85488	15.8348	0.171252	10.7644	0.0785671	11.5538	0.0543006	13.1186	0.68384		1065.17	104.836	1019	101.468	1161.25	229.045	1068.77	137.029	12.2494	1019	101.468
062114-07_204	Price Canyon	U. Castlegate	1.88819	14.1567	0.175141	10.1747	0.0782344	9.85405	0.0481123	21.29	0.717974		1076.94	94.2445	1040.38	97.7625	1152.83	195.59	949.788	198.504	9.75474	1040.38	97.7625
062114-07_257	Price Canyon	U. Castlegate	1.86762	17.316	0.177238	11.2852	0.0764256	13.0895	0.0609793	14.3076	0.654674		1069.69	115	1051.87	109.538	1106.24	261.606	1196.41	166.897	4.91491	1051.87	109.538
062114-07_03	Price Canyon	U. Castlegate	1.97955	14.014	0.179185	10.0121	0.0800915	9.74256	0.0499263	33.7063	0.718829		1108.57	94.813	1062.52	98.0842	1199.24	192.071	984.739	326.588	11.4006	1062.52	98.0842
062114-07_121	Price Canyon	U. Castlegate	1.84057	18.2525	0.179371	12.9779	0.0744136	12.8133	0.0584953	14.364	0.712175		1060.07	120.653	1063.54	127.257	1052.71	258.147	1149.03	161.084	-1.02891	1063.54	127.257
062114-07_271	Price Canyon	U. Castlegate	2.01078	9.58866	0.180353	7.01688	0.0808589	6.49125	0.0518472	16.0143	0.736021		1119.15	65.113	1068.9	69.1178	1218.02	127.626	1021.68	160.182	12.2425	1068.9	69.1178
062114-07_34	Price Canyon	U. Castlegate	2.07544	17.7196	0.18036	12.3095	0.0834154	12.7117	0.0524015	11.4838	0.696685		1140.73	122.003	1068.94	121.265	1278.95	247.756	1032.33	115.906	16.4208	1068.94	121.265
062114-07_145	Price Canyon	U. Castlegate	1.94418	15.3999	0.181001	10.6469	0.0779005	11.0992	0.0509495	11.0042	0.693217		1096.44	103.615	1072.44	105.198	1144.34	220.581	1004.43	108.117	6.28281	1072.44	105.198
062114-07_268	Price Canyon	U. Castlegate	2.02113	10.0042	0.183282	7.27229	0.0799859	6.84701	0.0751056	13.2738	0.729098		1122.64	68.0593	1084.88	72.617	1196.64	135.038	1463.75	188.3	9.33968	1084.88	72.617
062114-07_37	Price Canyon	U. Castlegate	2.14439	16.5926	0.184126	11.9624	0.084439	11.4601	0.0506531	14.7959	0.723165		1163.24	115.392	1089.47	119.923	1302.69	222.615	998.726	144.696	16.3671	1089.47	119.923
062114-07_02	Price Canyon	U. Castlegate	2.18958	12.2918	0.186589	8.24571	0.0851261	9.01226	0.0466957	10.0565	0.680087		1177.73	85.8831	1102.87	83.5903	1318.41	174.678	922.451	90.8853	16.3487	1102.87	83.5903
062114-07_194	Price Canyon	U. Castlegate	1.97461	15.2227	0.189151	10.7579	0.0757615	10.7209	0.0415129	36.2691	0.70994		1106.88	102.957	1116.77	110.321	1088.77	214.825	822.119	294.325	-2.57152	1116.77	110.321
062114-07_26	Price Canyon	U. Castlegate	2.05687	20.4212	0.190242	15.0123	0.0783394	13.8213	0.0521503	14.1917	0.736159		1134.58	140.41	1122.68	154.71	1155.49	274.227	1027.51	142.678	2.83951	1122.68	154.71
062114-07_70	Price Canyon	U. Castlegate	1.9965	15.8117	0.190764	11.2623	0.076007	11.0359	0.0500382	12.8518	0.716151		1114.33	107.369	1125.51	116.322	1095.25	220.923	986.893	124.168	-2.76259	1125.51	116.322
062114-07_200	Price Canyon	U. Castlegate	2.18846	16.9379	0.19227	12.3818	0.0826778	11.4604	0.0396647	41.1011	0.736356		1177.38	118.581	1133.66	128.735	1261.62	223.92	786.22	319.452	10.1426	1133.66	128.735
062114-07_117	Price Canyon	U. Castlegate	2.13116	15.17	0.19354	10.707	0.0798402	10.7064	0.0527567	12.333	0.708455		1158.96	105.215	1140.52	111.935	1193.04	211.264	1039.15	125.308	4.40232	1140.52	111.935
062114-07_216	Price Canyon	U. Castlegate	2.25346	12.4522	0.193827	9.0809	0.0843332	8.4562	0.0515147	16.1177	0.734066		1197.87	87.7928	1142.08	95.05	1300.25	164.319	1015.29	160.234	12.165	1142.08	95.05
062114-07_177	Price Canyon	U. Castlegate	2.21584	10.7682	0.205757	7.55749	0.0781037	7.61711	0.0595045	7.89774	0.706859		1186.06	75.4771	1206.17	83.141	1149.51	151.264	1168.29	89.8522	-4.92922	1149.51	151.264
062114-07_208	Price Canyon	U. Castlegate	2.39641	19.4451	0.198223	15.9927	0.0877012	11.0671	0.0654345	16.6447	0.822237		1241.53	140.194	1165.77	170.592	1375.95	212.796	1281.11	207.682	15.2753	1165.77	170.592
062114-07_254	Price Canyon	U. Castlegate	2.1614	13.2003	0.199779	9.32833	0.0784682	9.27358	0.059797	8.51592	0.711676		1168.72	91.887	1174.13	100.139	1158.75	183.909	1173.87	97.3528	-1.32713	1174.13	100.139
062114-07_86	Price Canyon	U. Castlegate	2.50916	15.1896	0.200397	10.6197	0.0907623	10.8318	0.0632909	22.6928	0.701059		1274.69	110.718	1177.45	114.298	1441.62	206.416	1240.4	274.879	18.3245	1177.45	114.298
062114-07_163	Price Canyon	U. Castlegate	2.58604	10.8606	0.218203	7.9383	0.0859693	7.34878	0.0622529	7.62434	0.73633		1296.69	79.6883	1272.37	91.6677	1337.49	142.056	1220.66	90.5149	4.86882	1337.49	142.056
062114-07_48	Price Canyon	U. Castlegate	2.7384	17.2576	0.23005	11.488	0.0863504	12.8505	0.0642221	12.9738	0.667482		1338.94	129.048	1334.76	138.525	1346.04	248.113	1258.09	158.869	0.837662	1346.04	248.113
062114-07_165	Price Canyon	U. Castlegate	2.75254	10.9819	0.230863	8.03325	0.0864884	7.42109	0.0716875	8.30882	0.737148		1342.78	81.9706	1339.02	97.1376	1349.12	143.222	1399.38	112.652	0.748464	1349.12	143.222
062114-07_56	Price Canyon	U. Castlegate	2.83832	16.2055	0.237419	11.1124	0.0867572	11.7834	0.0619803	12.7949	0.686507		1365.73	122.266	1373.26	137.464	1355.11	227.223	1215.47	151.501	-1.3398	1355.11	227.223
062114-07_13	Price Canyon	U. Castlegate	2.50258	20.1144	0.209057	14.3579	0.0868809	14.0382	0.0509176	14.0965	0.71618		1272.78	146.944	1223.79	160.072	1357.85	270.6	1003.81	138.52	9.87324	1357.85	270.6
062114-07_85	Price Canyon	U. Castlegate	2.54433	18.3292	0.212258	13.6213	0.0868925	12.2372	0.0586515	13.1057	0.744489		1284.81	134.381	1240.84	153.776	1358.11	235.876	1152.01	147.293	8.63519	1358.11	235.876
062114-07_94	Price Canyon	U. Castlegate	2.7763	15.8581	0.22813	11.8557	0.088236	10.494	0.0684601	12.7207	0.74973		1349.18	118.921	1324.69	141.989	1387.63	201.454	1338.42	165.417	4.53554	1387.63	201.454
062114-07_286	Price Canyon	U. Castlegate	2.92681	19.4395	0.240029	14.7602	0.0884199	12.6175	0.0699403	7.55551	0.760732		1388.87	148.162	1386.85	184.231	1391.62	242.086	1366.4	100.074	0.342984	1391.62	242.086
062114-07_67	Price Canyon	U. Castlegate	2.92374	15.3264	0.237359	10.7248	0.0894851	10.8884	0.0657719	11.699	0.703779		1388.07	116.469	1372.95	132.641	1414.56	208.256	1287.51	146.458	2.94154	1414.56	208.256
062114-07_46	Price Canyon	U. Castlegate	2.65048	17.9321	0.214324	12.5181	0.0897079	12.8086	0.0525926	13.1756	0.699858		1314.78	132.956	1251.81	142.45	1419.32	244.825	1036	133.501	11.8019	1419.32	244.825
062114-07_115	Price Canyon	U. Castlegate	2.5859	16.2392	0.206808	11.4475	0.0906645	11.484	0.0713127	12.3951	0.707036		1296.65	119.455	1211.79	126.477	1439.57	218.906	1392.31	167.461	15.8225	1439.57	218.906
062114-07_22	Price Canyon	U. Castlegate	2.8084	13.9092	0.222011	9.69809	0.0916737	9.94691	0.0649382	10.6164	0.698992		1357.78	104.515	1292.49	113.592	1460.64	189.064	1271.69	131.274	11.5116	1460.64	189.064
062114-07_223	Price Canyon	U. Castlegate	3.08338	9.80109	0.243535	7.02999	0.0918673	6.68439	0.074908	8.9373	0.731486		1428.57	75.2846	1405.05	88.7572	1464.64	126.985	1460.03	126.28	4.06898	1464.64	126.985
062114-07_55	Price Canyon	U. Castlegate	3.1268	17.1805	0.243492	12.8164	0.0931831	11.4297	0.0770133	13.2883	0.746598		1439.31	132.93	1404.82	161.814	1491.61	216.355	1499.58	192.974	5.81842	1491.61	216.355
062114-07_12	Price Canyon	U. Castlegate	2.75991	16.0259	0.21364	11.0574	0.093733	11.5502	0.0530276	12.8757	0.693235		1344.77	120.001	1248.18	125.493	1502.74	218.314	1044.35	131.48	16.9396	1502.74	218.314
062114-07_193	Price Canyon	U. Castlegate	3.23756	19.6292	0.250492	14.4898	0.0937875	13.2093	0.070496	35.7732	0.739695		1466.2	153.434	1441.01	187.161	1503.84	249.638	1376.9	481.857	4.17771	1503.84	249.638
062114-07_80	Price Canyon	U. Castlegate	3.2184	20.2217	0.246067	14.5225	0.0948459	14.026	0.0782111	12.7028	0.720351		1461.6	157.914	1418.16	184.922	1525.02	264.333	1522.05	187.106	7.00695	1525.02	264.333
062114-07_289	Price Canyon	U. Castlegate	3.87778	10.2618	0.293777	7.15703	0.0957168	7.312	0.0747002	8.69876	0.701637		1609.07	83.0194	1660.38	104.773	1542.22	137.491	1456.12	122.581	-7.66141	1542.22	137.491
062114-07_89	Price Canyon	U. Castlegate	3.61112	19.6017	0.273304	13.8783	0.0957764	13.8226	0.085497	12.3482	0.709035		1551.98	157.111	1557.55	192.087	1543.39	259.874	1658.17	197.543	-0.917605	1543.39	259.874
062114-07_113	Price Canyon	U. Castlegate	3.1042	18.4143	0.234904	12.3462	0.0958246	13.6376	0.0754502	21.2155	0.671948		1433.73	142.344	1360.15	151.422	1544.34	256.364	1470.22	303.103	11.9265	1544.34	256.364
062114-07_185	Price Canyon	U. Castlegate	3.61203	17.702	0.271475	12.7506	0.0964234	12.3143	0.0657441	21.0011	0.71839		1552.18	141.683	1548.28	175.541	1556.04	231.134	1286.98	263.565	0.498209	1556.04	231.134
062114-07_87	Price Canyon	U. Castlegate	3.77484	17.0479	0.283033	12.3183	0.0966773	11.7605	0.0769387	14.1907	0.723957		1587.41	137.687	1606.62	175.216	1560.97	220.598	1498.18	205.959	-2.92437	1560.97	220.598
062114-07_116	Price Canyon	U. Castlegate	3.08355	18.8797	0.229113	12.8609	0.0975854	13.7919	0.0697024	16.0939	0.682897		1428.61	145.749	1329.85	154.572	1578.48	258.116	1361.91	213.083	15.7514	1578.48	258.116
062114-07_279	Price Canyon	U. Castlegate	3.69883	15.1388	0.273433	11.5798	0.0981046	9.70451	0.074542	8.79745	0.767515		1571.12	121.581	1558.21	160.318	1588.41	181.388	1453.15	123.731	1.90129	1588.41	181.388
062114-07_88	Price Canyon	U. Castlegate	3.19158	19.2191	0.235542	13.8593	0.0982197	13.2941	0.0498066	13.8681	0.722174		1455.12	149.665	1363.48	170.362	1590.6	248.411	982.436	133.427	14.2788	1590.6	248.411
062114-07_210	Price Canyon	U. Castlegate	3.20252	11.6225	0.23606	8.59562	0.0984069	7.82055	0.0775671	13.3606	0.73975		1457.77	90.1675	1366.18	105.832	1594.15	146.066	1509.97	195.331	14.3005	1594.15	146.066
062114-07_184	Price Canyon	U. Castlegate	3.87323	16.1592	0.284912	11.1388	0.0985184	11.7424	0.0809125	20.5733	0.686988		1608.12	131.133	1616.05	159.25	1596.27	219.256	1572.62	313.696	-1.23947	1596.27	219.256
062114-07_100	Price Canyon	U. Castlegate	3.59998	15.5224	0.264758	11.2543	0.0986272	10.6425	0.0778055	11.1695	0.727961		1549.53	123.96	1514.14	151.9	1598.33	198.666	1514.44	163.635	5.26724	1598.33	198.666
062114-07_249	Price Canyon	U. Castlegate	3.51474	13.1127	0.258221	9.355	0.098721	9.13569	0.0640255	11.6159	0.71737		1530.53	104.016	1480.74	123.78	1600.1	170.499	1254.36	141.771	7.45991	1600.1	170.499
062114-07_74	Price Canyon	U. Castlegate	3.60068	16.6072	0.264643	11.6315	0.0987287	11.7943	0.0744376	15.1187	0.704015		1549.68	132.725	1513.55	156.94	1600.25	220.112	1451.18	212.826	5.41773	1600.25	220.112
062114-07_142	Price Canyon	U. Castlegate	3.92433	15.5135	0.28705	10.8335	0.0991514	11.0673	0.0777849	11.6195	0.700765		1618.71	126.179	1626.77	155.788	1608.21	206.333	1514.06	170.212	-1.15384	1608.21	206.333
062114-07_27	Price Canyon	U. Castlegate	3.73533	15.8118	0.272804	11.2599	0.0992096	11.0709	0.0813249	11.5926	0.713983		1578.97	127.309	1555.02	155.606	1609.31	206.371	1580.33	176.996	3.37339	1609.31	206.371
062114-07_211	Price Canyon	U. Castlegate	3.40001	14.6568	0.247614	9.83915	0.0995937	10.845	0.0764152	13.7072	0.672684		1504.4	115.495	1426.16	125.9	1616.51	201.974	1488.35	197.645	11.7753	1616.51	201.974
062114-07_192	Price Canyon	U. Castlegate	4.10508	14.2208	0.29885	10.0721	0.0996632	10.0059	0.0663285	34.2692	0.710593		1655.31	116.621	1685.61	149.421	1617.81	186.315	1298.06	435.509	-4.19087	1617.81	186.315
062114-07_84	Price Canyon	U. Castlegate	3.6398	15.6723	0.263197	10.8866	0.100249	11.2414	0.0791914	12.5214	0.696792		1558.28	125.471	1506.18	146.25	1628.7	209.03	1540.42	186.574	7.52273	1628.7	209.03
062114-07_195	Price Canyon	U. Castlegate	3.91105	18.1494	0.28302	13.0803	0.100301	12.5321	0.0592255	41.5344	0.723341		1615.97	147.796	1606.55	186.054	1629.67	233.002	1162.97	474.936	1.41832	1629.67	233.002
062114-07_218	Price Canyon	U. Castlegate	3.89339	9.53923	0.280995	6.5722	0.100514	6.81738	0.0830808	6.69155	0.699544		1612.31	77.2142	1596.37	92.9417	1633.61	126.688	1613.13	104.015	2.27926	1633.61	126.688
062114-07_25	Price Canyon	U. Castlegate	3.53197	15.3647	0.253673	10.3037	0.100886	11.3717	0.0744496	16.5974	0.67248		1534.4	122.172	1457.39	134.42	1640.47	211.136	1451.41	233.797	11.1603	1640.47	211.136
062114-07_283	Price Canyon	U. Castlegate	3.98976	13.2926	0.2854	9.61949	0.101382	9.12051	0.0975011	14.6113	0.727486		1632.11	108.331	1618.5	137.706	1649.58	169.097	1880.46	264.083	1.88385	1649.58	169.097
062114-07_296	Price Canyon	U. Castlegate	3.68781	11.3742	0.263825	8.43292	0.101443	7.57759	0.080976	8.07855	0.74578		1568.73	91.099	1509.38	113.493	1650.69	140.471	1573.81	122.689	8.56064	1650.69	140.471
062114-07_19	Price Canyon	U. Castlegate	3.42622	19.1858	0.24528	13.6268	0.101445	13.453	0.0619144	13.9267	0.712975		1510.43	151.92	1414.09	173.066	1650.72	249.387	1214.22	164.792	14.3353	1650.72	249.387
062114-07_236	Price Canyon	U. Castlegate	4.02095	15.4175	0.286245	11.0619	0.101875	10.7298	0.0791374	12.3772	0.718092		1638.44	126.011	1622.74	158.727	1658.56	198.708	1539.4	184.297	2.16022	1658.56	198.708
062114-07_178	Price Canyon	U. Castlegate	3.23889	13.5451	0.230249	9.64226	0.102014	9.4746	0.0543986	9.07188	0.714652		1466.52	105.466	1335.8	116.345	1661.09	175.407	1070.65	94.8227	19.5828	1661.09	175.407
062114-07_229	Price Canyon	U. Castlegate	3.80453	12.2569	0.270276	8.91735	0.102125	8.31499	0.0807258	7.37422	0.734736		1593.7	98.8623	1542.2	122.325	1663.09	153.899	1569.13	111.642	7.26906	1663.09	153.899
062114-07_188	Price Canyon	U. Castlegate	4.24449	13.9252	0.301057	10.04	0.102185	9.69135	0.073566	25.0912	0.71809		1682.67	114.922	1696.55	149.79	1664.19	179.349	1434.78	350.545	-1.94422	1664.19	179.349
062114-07_282	Price Canyon	U. Castlegate	3.3425	14.947	0.236892	12.1024	0.102329	8.71505	0.0811208	11.2296	0.812432		1491.04	117.339	1370.52	149.446	1666.79	161.229	1576.52	171.03	17.7752	1666.79	161.229
062114-07_09	Price Canyon	U. Castlegate	3.26261	17.6447	0.23079	12.09	0.102406	12.8642	0.0594893	13.827	0.684443		1472.19	137.974	1338.64	146.168	1668.19	237.946	1168	157.534	19.755	1668.19	237.946
062114-07_284	Price Canyon	U. Castlegate	4.59709	16.5393	0.325009	12.0179	0.102573	11.3227	0.0869924	12.2316	0.728928		1748.74	138.791	1814.14	190.086	1671.2	209.354	1685.99	198.832	-8.55333	1671.2	209.354
062114-07_191	Price Canyon	U. Castlegate	3.52664	16.0873	0.249184	11.4758	0.102672	11.2532	0.0619374	34.2143	0.714627		1533.21	127.935	1434.27	147.595	1672.99	208.022	1214.65	407.423	14.269	1672.99	208.022
062114-07_294	Price Canyon	U. Castlegate	3.94584	11.7521	0.277945	8.61685	0.103036	7.93909	0.0786784	18.8758	0.737327		1623.14	95.4819	1581.01	120.827	1679.52	146.638	1530.81	280.214	5.8653	1679.52	146.638
062114-07_299	Price Canyon	U. Castlegate	3.72525	11.1554	0.261481	8.21039	0.103313	7.5044	0.0887678	8.8372	0.73991		1576.81	89.5298	1497.41	109.719	1684.48	138.523	1718.98	146.157	11.1053	1684.48	138.523
062114-07_220	Price Canyon	U. Castlegate	4.06219	11.6099	0.284199	8.4979	0.103697	7.81317	0.0891508	7.13537	0.739707		1646.75	94.8729	1612.48	121.247	1691.31	144.099	1726.09	118.397	4.66137	1691.31	144.099
062114-07_264	Price Canyon	U. Castlegate	4.35606	11.7073	0.304044	8.46876	0.103927	8.06856	0.0868072	9.30238	0.724583		1704.05	96.9738	1711.33	127.303	1695.41	148.733	1682.55	150.741	-0.939005	1695.41	148.733
062114-07_179	Price Canyon	U. Castlegate	4.27018	11.5488	0.297791	8.12826	0.103986	8.16397	0.0891862	9.28706	0.70731		1687.63	95.2926	1680.35	120.247	1696.46	150.472	1726.75	154.292	0.949613	1696.46	150.472
062114-07_263	Price Canyon	U. Castlegate	4.33666	10.8951	0.30216	7.898	0.10411	7.48923	0.0857109	9.82967	0.726286		1700.36	90.1334	1702.01	118.156	1698.66	137.998	1662.15	157.458	-0.19761	1698.66	137.998
062114-07_251	Price Canyon	U. Castlegate	3.84068	14.1329	0.267266	10.0978	0.104226	9.8253	0.0947874	9.60074	0.71882		1601.31	114.338	1526.91	137.305	1700.7	180.997	1830.42	168.714	10.2185	1700.7	180.997
062114-07_293	Price Canyon	U. Castlegate	3.71075	12.445	0.257825	9.00457	0.104454	8.54338	0.0789182	10.3865	0.727146		1573.69	99.8603	1478.7	118.997	1704.72	157.303	1535.3	154.145	13.2583	1704.72	157.303
062114-07_222	Price Canyon	U. Castlegate	3.49281	12.6311	0.242607	9.54684	0.104465	8.15149	0.0760579	11.0046	0.763928		1525.59	100.03	1400.24	120.17	1704.91	150.084	1481.64	157.831	17.8705	1704.91	150.084
062114-07_76	Price Canyon	U. Castlegate	4.21792	16.6858	0.292329	11.839	0.104673	11.6988	0.0751325	12.6683	0.713047		1677.51	137.795	1653.16	172.678	1708.58	215.298	1464.25	179.733	3.24357	1708.58	215.298
062114-07_64	Price Canyon	U. Castlegate	3.69455	14.723	0.255153	9.97968	0.105202	10.7699	0.0672961	12.462	0.681849		1570.19	118.181	1465	130.797	1717.84	197.975	1316.39	159.448	14.7188	1717.84	197.975
062114-07_258	Price Canyon	U. Castlegate	4.16183	15.0278	0.286751	10.9735	0.105267	10.2148	0.0927977	10.4142	0.733471		1666.54	123.636	1625.27	157.674	1718.99	187.744	1793.66	179.542	5.45158	1718.99	187.744
062114-07_148	Price Canyon	U. Castlegate	4.36614	17.988	0.300732	13.2574	0.105292	12.1396	0.0648667	14.1577	0.737931		1705.95	149.685	1694.94	197.654	1719.43	223.11	1270.33	175.07	1.42423	1719.43	223.11
062114-07_129	Price Canyon	U. Castlegate	4.2474	19.1113	0.290082	13.8472	0.10621	13.1403	0.0853148	11.1885	0.726126		1683.23	158.344	1641.94	200.782	1735.35	241.024	1654.78	178.554	5.38271	1735.35	241.024
062114-07_66	Price Canyon	U. Castlegate	3.89557	14.6727	0.264043	10.222	0.107187	10.4647	0.070427	11.9787	0.70096		1612.77	119.094	1510.49	137.668	1752.13	191.552	1375.6	159.928	13.7911	1752.13	191.552
062114-07_164	Price Canyon	U. Castlegate	4.60276	10.7349	0.310343	7.94505	0.107585	7.1518	0.0932193	8.02312	0.745775		1749.77	89.7785	1742.4	121.317	1758.91	130.802	1801.45	138.754	0.938802	1758.91	130.802
062114-07_72	Price Canyon	U. Castlegate	4.42586	14.3649	0.297265	10.2056	0.108068	10.0397	0.0709281	13.7903	0.715228		1717.19	119.525	1677.73	150.783	1767.1	183.436	1385.06	185.454	5.05723	1767.1	183.436
062114-07_141	Price Canyon	U. Castlegate	4.9984	15.7048	0.334351	11.0804	0.108423	11.089	0.0868351	12.6222	0.708126		1819.05	133.646	1859.44	179.026	1773.09	202.46	1683.07	204.87	-4.86994	1773.09	202.46
062114-07_167	Price Canyon	U. Castlegate	4.50943	10.994	0.301581	7.96688	0.108469	7.5065	0.0904024	8.1397	0.730645		1732.71	91.6169	1699.14	119.011	1773.85	137.038	1749.3	136.863	4.21182	1773.85	137.038
062114-07_30	Price Canyon	U. Castlegate	4.42666	17.212	0.29411	12.1886	0.109059	12.1204	0.0809153	11.3197	0.710022		1717.34	143.51	1662.04	178.616	1783.76	221.002	1572.68	172.003	6.82412	1783.76	221.002
062114-07_38	Price Canyon	U. Castlegate	4.30257	19.7249	0.285678	13.6955	0.109202	14.164	0.0808146	16.6789	0.695963		1693.85	163.921	1619.89	196.234	1786.14	258.192	1570.79	253.654	9.30754	1786.14	258.192
062114-07_171	Price Canyon	U. Castlegate	4.0796	10.3768	0.270797	7.75987	0.109281	6.811	0.0627945	9.54188	0.754471		1650.23	84.8186	1544.85	106.606	1787.46	124.136	1230.96	114.274	13.5732	1787.46	124.136
062114-07_32	Price Canyon	U. Castlegate	4.62039	18.7939	0.306098	13.5897	0.109406	12.9484	0.0690479	21.0789	0.72479		1752.96	158.143	1721.48	205.38	1789.55	235.936	1349.54	277.069	3.80393	1789.55	235.936
062114-07_126	Price Canyon	U. Castlegate	4.46472	12.0307	0.293191	8.71908	0.110458	8.25286	0.0888291	10.3857	0.727624		1724.44	100.127	1657.45	127.448	1806.96	150.022	1720.12	171.986	8.27372	1806.96	150.022
062114-07_35	Price Canyon	U. Castlegate	4.27565	15.2477	0.276364	11.0037	0.112155	10.5136	0.0826511	11.9692	0.724273		1688.68	126.12	1573.02	153.62	1834.63	190.512	1605.11	185.537	14.2593	1834.63	190.512
062114-07_122	Price Canyon	U. Castlegate	4.27146	13.5181	0.275417	10.116	0.112474	8.93876	0.0930955	11.4067	0.750175		1687.88	111.67	1568.24	140.843	1839.77	161.881	1799.16	197.317	14.7589	1839.77	161.881
062114-07_273	Price Canyon	U. Castlegate	4.86308	10.7705	0.313313	8.0936	0.112567	7.05974	0.0976791	10.6701	0.75523		1795.88	90.9515	1756.99	124.487	1841.26	127.764	1883.74	192.831	4.57711	1841.26	127.764
062114-07_285	Price Canyon	U. Castlegate	4.98979	10.63	0.320776	7.59275	0.112802	7.38027	0.0970998	10.1874	0.71972		1817.59	90.1516	1793.52	118.888	1845.04	133.506	1873.07	183.07	2.7923	1845.04	133.506
062114-07_136	Price Canyon	U. Castlegate	4.69245	16.2799	0.300971	11.4287	0.113083	11.5265	0.0800837	11.7479	0.706204		1765.89	137.091	1696.12	170.481	1849.54	208.399	1557.12	176.832	8.29492	1849.54	208.399
062114-07_124	Price Canyon	U. Castlegate	4.91384	15.3471	0.302157	11.3019	0.117958	10.3587	0.0944211	12.4197	0.737852		1804.64	130.19	1702	169.097	1925.52	185.641	1823.66	217.744	11.6086	1925.52	185.641
062114-07_61	Price Canyon	U. Castlegate	5.10119	14.3845	0.309493	9.95594	0.119729	10.3387	0.081779	11.5455	0.695288		1836.3	122.713	1738.21	151.715	1952.18	184.717	1588.82	177.187	10.9606	1952.18	184.717
062114-07_51	Price Canyon	U. Castlegate	5.54006	16.4133	0.306192	11.1738	0.131264	12.0071	0.0926209	13.5949	0.681788		1906.83	142.095	1721.94	168.891	2114.95	210.502	1790.39	234.284	18.5824	2114.95	210.502
062114-07_235	Price Canyon	U. Castlegate	9.61749	14.5549	0.42345	10.1144	0.16472	10.4522	0.112285	12.5217	0.695919		2398.85	134.653	2276.12	194.022	2504.7	175.853	2150.91	257.124	9.12579	2504.7	175.853
062114-07_233	Price Canyon	U. Castlegate	8.98665	17.3482	0.384803	12.8212	0.169393	11.6545	0.111234	12.7328	0.740733		2336.65	159.819	2098.68	229.764	2551.65	195.164	2131.8	259.269	17.7521	2551.65	195.164
062114-07_15	Price Canyon	U. Castlegate	9.64539	17.3658	0.396435	12.3423	0.176661	12.1498	0.109568	16.8785	0.714506		2401.51	161.104	2152.6	225.966	2621.77	202.069	2101.49	339.723	17.8949	2621.77	202.069
062114-07_246	Price Canyon	U. Castlegate	12.0599	17.2272	0.479845	12.1233	0.182279	12.2125	0.124564	10.3354	0.705301		2609.07	162.912	2526.59	253.542	2673.71	202.108	2372.83	232.729	5.50257	2673.71	202.108
062114-07_278	Price Canyon	U. Castlegate	13.3544	9.4814	0.529041	6.97047	0.183066	6.35835	0.138946	6.99457	0.741838		2705.04	89.7991	2737.41	155.502	2680.85	105.155	2629.68	173.212	-2.10993	2680.85	105.155
062114-07_134	Price Canyon	U. Castlegate	12.2922	15.5467	0.485286	11.0643	0.183723	10.8471	0.126753	11.5829	0.716397		2626.98	147.001	2550.25	233.142	2686.77	179.291	2412.13	265.098	5.081	2686.77	179.291
062114-07_224	Price Canyon	U. Castlegate	13.0189	13.8134	0.490388	9.10222	0.19263	10.297	0.11605	18.2541	0.666618		2681.02	130.976	2572.36	193.124	2764.75	168.979	2219.21	387.339	6.95877	2764.75	168.979
062114-07_69	Price Canyon	U. Castlegate	12.5668	15.0479	0.456751	10.438	0.199838	10.7759	0.112933	12.6932	0.698002		2647.74	142.458	2425.2	211.049	2824.88	175.889	2162.69	262.029	14.1486	2824.88	175.889
062114-07_24	Price Canyon	U. Castlegate	13.5949	21.5915	0.47156	15.7996	0.208902	14.6972	0.22936	17.9498	0.732567		2721.91	207.037	2490.4	326.659	2897.04	238.398	4173.69	688.473	14.0366	2897.04	238.398
062114-07_45	Price Canyon	U. Castlegate	20.3039	15.7075	0.587312	10.7602	0.250772	11.4069	0.154735	13.0728	0.687482		3105.95	153.156	2978.51	256.788	3189.64	180.574	2907.95	357.206	6.61927	3189.64	180.574
150413-03_113	Price Canyon	U. Castlegate	0.101005	22.5169	0.0154832	6.58226	0.0473127	21.5333			0.292326		97.7032	20.9752	99.0465	6.46967	65.0333	513.94			-1.37493	99.0465	6.46967
150413-03_78	Price Canyon	U. Castlegate	0.25542	18.6431	0.0367492	3.86128	0.0504086	18.2388			0.207116		230.969	38.5181	232.652	8.82316	213.902	423.24			-0.728419	232.652	8.82316
150413-03_7	Price Canyon	U. Castlegate	0.385237	11.2939	0.0543209	7.09552	0.0514351	8.78668			0.628261		330.884	31.8943	340.995	23.5666	260.401	201.91			-3.05571	340.995	23.5666
150413-03_105	Price Canyon	U. Castlegate	0.459311	16.7889	0.0635668	3.98377	0.0524053	16.3094			0.237286		383.779	53.6676	397.281	15.3489	303.115	372.295			-3.51811	397.281	15.3489
150413-03_117	Price Canyon	U. Castlegate	0.532757	5.96964	0.0705297	3.57683	0.0547842	4.77942			0.59917		433.637	21.0692	439.346	15.1911	403.405	107.068			-1.31648	439.346	15.1911
150413-03_39	Price Canyon	U. Castlegate	0.567196	13.6492	0.0719207	5.42235	0.0571976	12.526			0.397264		456.199	50.1691	447.717	23.453	499.138	276.158			1.85931	447.717	23.453
150413-03_37	Price Canyon	U. Castlegate	0.589769	9.19312	0.0756579	7.41955	0.0565362	5.42806			0.807076		470.72	34.6324	470.153	33.6416	473.493	120.124			0.120545	470.153	33.6416
150413-03_112	Price Canyon	U. Castlegate	0.588635	9.69012	0.0767407	8.69896	0.0556313	4.26925			0.897714		469.995	36.4609	476.639	39.967	437.661	95.0594			-1.41347	476.639	39.967
150413-03_84	Price Canyon	U. Castlegate	0.706192	4.50237	0.0881514	3.04314	0.0581022	3.31823			0.675898		542.483	18.9225	544.595	15.8921	533.623	72.6561			-0.389336	544.595	15.8921
150413-03_45	Price Canyon	U. Castlegate	0.719668	17.6404	0.0907996	4.02181	0.057484	17.1758			0.227989		550.471	74.9934	560.264	21.5814	510.154	378.215			-1.77912	560.264	21.5814
150413-03_32	Price Canyon	U. Castlegate	0.737407	7.38323	0.0911656	5.2498	0.0586645	5.1915			0.711044		560.891	31.8213	562.427	28.2749	554.669	113.279			-0.273749	562.427	28.2749
150413-03_9	Price Canyon	U. Castlegate	1.10991	9.97885	0.117561	9.41952	0.0684734	3.29395			0.943948		758.13	53.313	716.51	63.8767	882.937	68.1605			18.8492	716.51	63.8767
150413-03_2	Price Canyon	U. Castlegate	1.50512	5.5962	0.153889	5.41489	0.0709356	1.41294			0.967602		932.465	34.1434	922.725	46.5535	955.538	28.8756			3.43397	922.725	46.5535
150413-03_6	Price Canyon	U. Castlegate	1.54421	5.47918	0.157238	3.69425	0.0712273	4.04648			0.674233		948.184	33.7706	941.41	32.3579	963.961	82.6006			2.33937	941.41	32.3579
150413-03_27	Price Canyon	U. Castlegate	1.68207	11.6392	0.162368	4.83136	0.075135	10.5891			0.415094		1001.76	74.1514	969.921	43.5056	1072.13	212.876			9.53369	969.921	43.5056
150413-03_80	Price Canyon	U. Castlegate	1.68253	6.85718	0.163434	6.58854	0.0746655	1.90053			0.960824		1001.94	43.6778	975.833	59.6639	1059.53	38.2892			7.89961	975.833	59.6639
150413-03_63	Price Canyon	U. Castlegate	1.70827	3.40126	0.170025	3.37183	0.0728686	0.446474			0.991347		1011.63	21.7847	1012.25	31.5866	1010.28	9.05428			-0.194811	1012.25	31.5866
150413-03_99	Price Canyon	U. Castlegate	1.94166	15.8479	0.175578	3.8734	0.0802049	15.3673			0.244411		1095.57	106.311	1042.77	37.2933	1202.03	303.253			13.2487	1042.77	37.2933
150413-03_43	Price Canyon	U. Castlegate	1.8332	4.46	0.177014	4.37014	0.0751105	0.890746			0.979853		1057.43	29.304	1050.64	42.3684	1071.48	17.8951			1.94463	1050.64	42.3684
150413-03_92	Price Canyon	U. Castlegate	1.81193	4.70553	0.177847	3.75163	0.0738913	2.8403			0.79728		1049.77	30.7899	1055.2	36.5171	1038.48	57.3865			-1.60981	1055.2	36.5171
150413-03_60	Price Canyon	U. Castlegate	1.87446	5.78416	0.180264	3.29817	0.0754164	4.7517			0.570207		1072.11	38.3038	1068.42	32.4729	1079.64	95.3576			1.03958	1068.42	32.4729
150413-03_81	Price Canyon	U. Castlegate	1.87782	3.68884	0.18048	2.93249	0.0754611	2.23786			0.794964		1073.29	24.4416	1069.6	28.9019	1080.82	44.8725			1.03827	1069.6	28.9019
150413-03_108	Price Canyon	U. Castlegate	1.91336	9.51836	0.180896	5.03972	0.0767123	8.07468			0.529473		1085.76	63.4945	1071.87	49.7674	1113.7	161.27			3.75599	1071.87	49.7674
150413-03_18	Price Canyon	U. Castlegate	1.87322	4.42935	0.181076	3.29614	0.0750286	2.95882			0.744159		1071.67	29.3238	1072.85	32.5768	1069.29	59.4864			-0.333569	1072.85	32.5768
150413-03_31	Price Canyon	U. Castlegate	1.87334	3.34356	0.181106	2.69399	0.0750207	1.98037			0.805723		1071.71	22.1353	1073.02	26.6293	1069.08	39.7633			-0.368474	1073.02	26.6293
150413-03_14	Price Canyon	U. Castlegate	1.94791	1.94473	0.184298	1.90469	0.076656	0.392591			0.979411		1097.73	13.0481	1090.41	19.1074	1112.24	7.87707			1.96191	1090.41	19.1074
150413-03_55	Price Canyon	U. Castlegate	1.96863	7.63286	0.184693	5.30672	0.0773058	5.48627			0.695247		1104.84	51.4064	1092.56	53.3324	1129.09	109.3			3.23536	1092.56	53.3324
150413-03_46	Price Canyon	U. Castlegate	1.94152	8.16975	0.18481	4.10201	0.0761928	7.06529			0.502098		1095.52	54.7663	1093.2	41.2471	1100.14	141.417			0.630751	1093.2	41.2471
150413-03_91	Price Canyon	U. Castlegate	1.97019	4.6205	0.185927	3.70619	0.0768536	2.7592			0.802119		1105.37	31.1226	1099.27	37.4568	1117.41	55.0679			1.62349	1099.27	37.4568
150413-03_19	Price Canyon	U. Castlegate	1.93462	4.13543	0.186049	3.25927	0.0754166	2.54537			0.788134		1093.14	27.6835	1099.93	32.9582	1079.65	51.0772			-1.87909	1099.93	32.9582
150413-03_16	Price Canyon	U. Castlegate	1.92477	6.46573	0.186382	5.30159	0.0748985	3.7012			0.819952		1089.73	43.2116	1101.75	53.6917	1065.8	74.4304			-3.37313	1101.75	53.6917
150413-03_77	Price Canyon	U. Castlegate	1.9416	3.89873	0.186501	2.9779	0.0755051	2.51638			0.763814		1095.55	26.1308	1102.4	30.1747	1081.97	50.4761			-1.88801	1102.4	30.1747
150413-03_8	Price Canyon	U. Castlegate	1.9763	5.35409	0.186965	5.15328	0.076664	1.45259			0.962493		1107.46	36.1026	1104.91	52.3271	1112.44	29.0073			0.67697	1104.91	52.3271
150413-03_86	Price Canyon	U. Castlegate	1.95413	6.16997	0.187189	3.17602	0.0757131	5.28975			0.514754		1099.87	41.4473	1106.13	32.2821	1087.48	106.074			-1.7154	1106.13	32.2821
150413-03_101	Price Canyon	U. Castlegate	1.99029	5.00598	0.188926	4.16295	0.0764049	2.78023			0.831595		1112.22	33.8347	1115.56	42.6441	1105.7	55.5434			-0.891907	1115.56	42.6441
150413-03_26	Price Canyon	U. Castlegate	2.05858	3.74709	0.190082	1.91308	0.078546	3.22192			0.510552		1135.15	25.6091	1121.82	19.6978	1160.7	63.862			3.34948	1121.82	19.6978
150413-03_88	Price Canyon	U. Castlegate	1.99537	5.4433	0.191555	4.11158	0.0755489	3.56712			0.755348		1113.95	36.8224	1129.8	42.6098	1083.12	71.5446			-4.30889	1129.8	42.6098
150413-03_110	Price Canyon	U. Castlegate	2.07199	6.89274	0.194282	3.71374	0.0773488	5.80672			0.53879		1139.59	47.2137	1144.53	38.9455	1130.19	115.668			-1.26857	1144.53	38.9455
150413-03_67	Price Canyon	U. Castlegate	2.15079	6.55211	0.197675	5.99925	0.0789121	2.63423			0.915621		1165.31	45.4216	1162.82	63.8311	1169.91	52.1618			0.606168	1162.82	63.8311
150413-03_50	Price Canyon	U. Castlegate	2.25784	6.6677	0.201812	5.84244	0.0811415	3.21312			0.87623		1199.23	46.9296	1185.05	63.2452	1224.85	63.1561			3.24981	1185.05	63.2452
150413-03_36	Price Canyon	U. Castlegate	2.3389	10.3361	0.210495	5.18269	0.0805876	8.94292			0.501414		1224.19	73.5507	1231.45	58.0972	1211.39	176.093			-1.65642	1211.39	176.093
150413-03_103	Price Canyon	U. Castlegate	2.40969	5.1886	0.214823	4.47175	0.081354	2.63153			0.861843		1245.49	37.237	1254.46	50.976	1230.03	51.692			-1.98645	1230.03	51.692
150413-03_106	Price Canyon	U. Castlegate	2.52174	13.3693	0.223082	6.50736	0.081985	11.6787			0.486739		1278.32	97.2778	1298.14	76.5133	1245.14	228.915			-4.25653	1245.14	228.915
150413-03_23	Price Canyon	U. Castlegate	2.53996	6.2953	0.222363	6.23691	0.0828447	0.855468			0.990724		1283.56	45.8721	1294.35	73.1398	1265.54	16.6699			-2.27623	1265.54	16.6699
150413-03_15	Price Canyon	U. Castlegate	2.75498	2.86403	0.231708	1.7308	0.0862337	2.28189			0.604322		1343.44	21.3371	1343.44	20.9893	1343.41	44.0759			-0.00238555	1343.41	44.0759
150413-03_64	Price Canyon	U. Castlegate	2.82574	8.05512	0.237275	4.67873	0.0863734	6.55701			0.58084		1362.39	60.4292	1372.51	57.8409	1346.54	126.63			-1.92921	1346.54	126.63
150413-03_58	Price Canyon	U. Castlegate	2.4898	4.22633	0.208736	4.03978	0.0865099	1.24177			0.955861		1269.07	30.6189	1222.08	44.9722	1349.58	23.9649			9.44758	1349.58	23.9649
150413-03_44	Price Canyon	U. Castlegate	2.88091	6.90783	0.239204	6.09316	0.0873495	3.25448			0.882065		1376.93	52.0791	1382.56	75.8212	1368.2	62.6503			-1.04936	1368.2	62.6503
150413-03_107	Price Canyon	U. Castlegate	2.89071	3.78478	0.239725	2.62032	0.0874559	2.73101			0.692332		1379.49	28.5545	1385.27	32.6634	1370.54	52.5539			-1.07437	1370.54	52.5539
150413-03_20	Price Canyon	U. Castlegate	3.0038	6.75491	0.24877	5.92232	0.0875734	3.24884			0.876742		1408.58	51.4685	1432.13	76.0555	1373.13	62.5			-4.297	1373.13	62.5
150413-03_61	Price Canyon	U. Castlegate	2.98526	5.96952	0.241361	5.85464	0.0897046	1.16548			0.980756		1403.87	45.4116	1393.77	73.3823	1419.23	22.2775			1.79418	1419.23	22.2775
150413-03_49	Price Canyon	U. Castlegate	2.61146	5.61217	0.210981	5.50633	0.0897718	1.08479			0.981141		1303.87	41.2118	1234.04	61.8429	1420.66	20.7313			13.1361	1420.66	20.7313
150413-03_13	Price Canyon	U. Castlegate	3.02872	2.89043	0.2443	1.40883	0.0899158	2.52384			0.487411		1414.89	22.0649	1409.01	17.8309	1423.72	48.2141			1.03339	1423.72	48.2141
150413-03_3	Price Canyon	U. Castlegate	3.00309	5.98267	0.240625	5.71103	0.0905162	1.78227			0.954595		1408.4	45.5796	1389.94	71.4063	1436.43	33.9883			3.23603	1436.43	33.9883
150413-03_96	Price Canyon	U. Castlegate	3.00594	3.88131	0.24054	3.00646	0.090634	2.45474			0.7746		1409.13	29.5743	1389.51	37.5796	1438.91	46.7976			3.4331	1438.91	46.7976
150413-03_83	Price Canyon	U. Castlegate	3.11662	5.00749	0.247936	3.32159	0.091168	3.74727			0.663325		1436.8	38.4986	1427.82	42.5416	1450.1	71.3342			1.53597	1450.1	71.3342
150413-03_35	Price Canyon	U. Castlegate	3.36516	3.97136	0.264033	3.89375	0.0924369	0.781259			0.980459		1496.32	31.0891	1510.44	52.4311	1476.36	14.8187			-2.30858	1476.36	14.8187
150413-03_66	Price Canyon	U. Castlegate	3.40805	2.79165	0.263586	2.20177	0.093774	1.71626			0.788697		1506.25	21.9163	1508.16	29.6079	1503.55	32.4326			-0.306658	1503.55	32.4326
150413-03_48	Price Canyon	U. Castlegate	3.46186	6.43648	0.267106	5.56914	0.0939993	3.22692			0.865245		1518.57	50.7181	1526.1	75.6802	1508.08	60.9491			-1.19442	1508.08	60.9491
150413-03_70	Price Canyon	U. Castlegate	3.40373	3.6044	0.261478	2.74356	0.0944102	2.33764			0.76117		1505.26	28.2895	1497.4	36.6597	1516.32	44.1021			1.24768	1516.32	44.1021
150413-03_72	Price Canyon	U. Castlegate	3.36127	4.44447	0.257861	3.25681	0.0945401	3.02432			0.732779		1495.42	34.7843	1478.89	43.0393	1518.91	57.0395			2.63484	1518.91	57.0395
150413-03_74	Price Canyon	U. Castlegate	3.63842	3.15462	0.274286	3.09931	0.0962072	0.588174			0.982465		1557.98	25.1271	1562.52	43.0052	1551.8	11.045			-0.690577	1551.8	11.045
150413-03_21	Price Canyon	U. Castlegate	3.76445	4.80962	0.275286	4.2118	0.099178	2.32233			0.875702		1585.2	38.5906	1567.58	58.6092	1608.7	43.2854			2.55599	1608.7	43.2854
150413-03_89	Price Canyon	U. Castlegate	3.85821	2.36433	0.27906	1.22915	0.100274	2.01971			0.519874		1604.99	19.0661	1586.63	17.2875	1629.15	37.5449			2.61013	1629.15	37.5449
150413-03_69	Price Canyon	U. Castlegate	3.96659	2.52318	0.286049	2.44575	0.100572	0.620262			0.969314		1627.39	20.4622	1621.76	35.0684	1634.66	11.5228			0.789342	1634.66	11.5228
150413-03_115	Price Canyon	U. Castlegate	4.14339	5.57363	0.297553	4.30442	0.100993	3.54081			0.772283		1662.91	45.5982	1679.16	63.632	1642.42	65.7112			-2.23693	1642.42	65.7112
150413-03_71	Price Canyon	U. Castlegate	4.13706	2.45562	0.294975	2.2587	0.10172	0.963498			0.91981		1661.65	20.0809	1666.34	33.1667	1655.72	17.8475			-0.641385	1655.72	17.8475
150413-03_100	Price Canyon	U. Castlegate	4.05384	4.17196	0.286964	3.9351	0.102456	1.38571			0.943227		1645.07	33.9825	1626.34	56.5638	1669.07	25.6264			2.56001	1669.07	25.6264
150413-03_30	Price Canyon	U. Castlegate	3.8609	2.68873	0.272317	2.46914	0.102828	1.06424			0.918331		1605.55	21.6853	1552.55	34.0679	1675.77	19.6671			7.35279	1675.77	19.6671
150413-03_79	Price Canyon	U. Castlegate	4.243	2.62205	0.29873	2.56459	0.103013	0.545912			0.978086		1682.38	21.5467	1685.01	38.0274	1679.1	10.0841			-0.351978	1679.1	10.0841
150413-03_57	Price Canyon	U. Castlegate	4.04905	2.85047	0.28487	1.86642	0.103087	2.15445			0.654777		1644.11	23.2118	1615.84	26.6758	1680.42	39.788			3.84263	1680.42	39.788
150413-03_120	Price Canyon	U. Castlegate	4.40047	5.77465	0.308455	5.54306	0.103468	1.61898			0.959895		1712.43	47.7863	1733.1	84.2377	1687.23	29.8753			-2.71864	1687.23	29.8753
150413-03_95	Price Canyon	U. Castlegate	4.29437	4.31797	0.299926	4.28332	0.103845	0.545952			0.991975		1692.28	35.5663	1690.94	63.7085	1693.93	10.0658			0.176208	1693.93	10.0658
150413-03_116	Price Canyon	U. Castlegate	4.52938	5.3485	0.316147	4.70927	0.103908	2.5356			0.880484		1736.38	44.4932	1770.88	72.9223	1695.05	46.7413			-4.47379	1695.05	46.7413
150413-03_90	Price Canyon	U. Castlegate	4.46478	2.62537	0.307383	2.39297	0.105346	1.07993			0.911479		1724.45	21.7803	1727.81	36.2688	1720.35	19.845			-0.433699	1720.35	19.845
150413-03_17	Price Canyon	U. Castlegate	4.63707	6.52989	0.316538	6.5038	0.106247	0.583231			0.996003		1755.97	54.5545	1772.8	100.806	1735.98	10.6964			-2.12128	1735.98	10.6964
150413-03_28	Price Canyon	U. Castlegate	4.33371	2.20212	0.295806	1.89335	0.106256	1.12454			0.859782		1699.8	18.1683	1670.48	27.8622	1736.13	20.6202			3.78135	1736.13	20.6202
150413-03_33	Price Canyon	U. Castlegate	4.68312	3.92684	0.319506	3.70788	0.106305	1.29293			0.944241		1764.23	32.8594	1787.32	57.8782	1736.99	23.706			-2.89749	1736.99	23.706
150413-03_47	Price Canyon	U. Castlegate	4.56867	4.64027	0.311604	4.57107	0.106337	0.798387			0.985087		1743.57	38.6602	1748.59	70.0069	1737.54	14.636			-0.636396	1737.54	14.636
150413-03_119	Price Canyon	U. Castlegate	4.43239	1.70823	0.301815	1.25984	0.106511	1.15362			0.737515		1718.41	14.1524	1700.3	18.829	1740.54	21.1419			2.31151	1740.54	21.1419
150413-03_51	Price Canyon	U. Castlegate	4.34733	3.59227	0.296023	3.53242	0.106512	0.652977			0.983341		1702.39	29.6562	1671.56	52.0122	1740.54	11.9652			3.96338	1740.54	11.9652
150413-03_68	Price Canyon	U. Castlegate	4.49591	5.86046	0.305662	5.43613	0.106678	2.1894			0.927594		1730.22	48.6881	1719.32	82.0398	1743.4	40.1141			1.38085	1743.4	40.1141
150413-03_53	Price Canyon	U. Castlegate	4.43597	3.21029	0.301222	2.71998	0.106807	1.7052			0.847268		1719.08	26.6018	1697.37	40.5901	1745.62	31.2327			2.76417	1745.62	31.2327
150413-03_73	Price Canyon	U. Castlegate	4.62209	3.80862	0.313792	3.21145	0.106831	2.04749			0.843205		1753.27	31.7961	1759.34	49.4467	1746.01	37.5013			-0.763207	1746.01	37.5013
150413-03_62	Price Canyon	U. Castlegate	4.50491	7.19158	0.304813	5.58062	0.107189	4.53603			0.775993		1731.88	59.7744	1715.13	84.0411	1752.15	83.0267			2.11298	1752.15	83.0267
150413-03_42	Price Canyon	U. Castlegate	3.79419	5.35523	0.255098	5.30468	0.107873	0.734034			0.990562		1591.52	43.0405	1464.71	69.5042	1763.78	13.4157			16.956	1763.78	13.4157
150413-03_41	Price Canyon	U. Castlegate	4.12562	6.19432	0.277182	6.07376	0.10795	1.21613			0.980538		1659.39	50.6356	1577.15	84.9755	1765.09	22.2232			10.6475	1765.09	22.2232
150413-03_85	Price Canyon	U. Castlegate	4.54793	3.21621	0.303606	3.1221	0.108643	0.772356			0.970737		1739.78	26.7721	1709.17	46.8739	1776.77	14.0897			3.80503	1776.77	14.0897
150413-03_1	Price Canyon	U. Castlegate	4.60913	1.97835	0.307502	1.41529	0.10871	1.38233			0.715387		1750.92	16.5069	1728.4	21.457	1777.89	25.2169			2.78356	1777.89	25.2169
150413-03_5	Price Canyon	U. Castlegate	4.83322	4.50023	0.320026	4.30755	0.109534	1.30272			0.957185		1790.7	37.8655	1789.85	67.3217	1791.66	23.7277			0.101001	1791.66	23.7277
150413-03_52	Price Canyon	U. Castlegate	4.91751	5.28455	0.324784	5.24434	0.109812	0.650637			0.992392		1805.27	44.5978	1813.05	82.8829	1796.27	11.8438			-0.934281	1796.27	11.8438
150413-03_75	Price Canyon	U. Castlegate	4.78775	6.80363	0.31275	6.70585	0.111028	1.14937			0.985627		1782.75	57.162	1754.22	102.99	1816.3	20.8675			3.41751	1816.3	20.8675
150413-03_11	Price Canyon	U. Castlegate	4.91379	3.68688	0.318922	2.16023	0.111746	2.98772			0.585924		1804.63	31.1081	1784.46	33.6732	1827.98	54.1715			2.38087	1827.98	54.1715
150413-03_10	Price Canyon	U. Castlegate	5.08094	4.23709	0.329515	4.12596	0.111832	0.964052			0.973772		1832.93	35.9514	1836.03	65.9218	1829.39	17.4782			-0.363177	1829.39	17.4782
150413-03_87	Price Canyon	U. Castlegate	5.27222	4.34096	0.339138	4.32828	0.11275	0.33156			0.997079		1864.38	37.0541	1882.52	70.6624	1844.19	6.00027			-2.07848	1844.19	6.00027
150413-03_54	Price Canyon	U. Castlegate	4.92074	4.51835	0.313544	4.45232	0.113823	0.769656			0.985385		1805.82	38.1343	1758.12	68.5113	1861.31	13.8999			5.54398	1861.31	13.8999
150413-03_59	Price Canyon	U. Castlegate	4.90589	2.36297	0.310353	2.18086	0.114647	0.909656			0.922932		1803.27	19.9312	1742.44	33.2977	1874.32	16.4025			7.03609	1874.32	16.4025
150413-03_114	Price Canyon	U. Castlegate	5.29722	4.77974	0.331937	3.5613	0.115742	3.18796			0.745082		1868.41	40.8312	1847.77	57.214	1891.44	57.3656			2.30927	1891.44	57.3656
150413-03_56	Price Canyon	U. Castlegate	6.42452	1.89522	0.365259	1.73228	0.127567	0.768809			0.914025		2035.63	16.6522	2007.05	29.876	2064.7	13.5575			2.79183	2064.7	13.5575
150413-03_76	Price Canyon	U. Castlegate	8.35992	5.45042	0.414044	5.22688	0.146438	1.54494			0.958986		2270.84	49.4397	2233.38	98.6626	2304.73	26.5315			3.09552	2304.73	26.5315
150413-03_40	Price Canyon	U. Castlegate	10.835	3.90155	0.476887	3.81524	0.164783	0.816093			0.977879		2509.07	36.2722	2513.69	79.4171	2505.32	13.7259			-0.334018	2505.32	13.7259
150413-03_24	Price Canyon	U. Castlegate	11.8397	6.65226	0.485529	6.59939	0.176857	0.836976			0.992053		2591.8	62.3047	2551.3	139.051	2623.6	13.9215			2.75573	2623.6	13.9215
150413-03_22	Price Canyon	U. Castlegate	13.2407	4.91616	0.523285	4.69508	0.183514	1.45769			0.95503		2696.96	46.4206	2713.1	103.975	2684.88	24.099			-1.05108	2684.88	24.099
150413-03_34	Price Canyon	U. Castlegate	13.6255	4.77177	0.532389	4.75722	0.185619	0.372463			0.996949		2724.04	45.1464	2751.51	106.547	2703.72	6.14854			-1.7677	2703.72	6.14854
150413-03_94	Price Canyon	U. Castlegate	12.8049	7.14403	0.498049	7.13569	0.186467	0.345128			0.998832		2665.4	67.3093	2605.41	152.94	2711.23	5.69323			3.90327	2711.23	5.69323
150413-03_97	Price Canyon	U. Castlegate	12.576	1.28297	0.487096	1.25247	0.187252	0.27809			0.976226		2648.43	12.0677	2558.1	26.4462	2718.16	4.58438			5.88861	2718.16	4.58438
150413-03_38	Price Canyon	U. Castlegate	13.8086	6.72187	0.532116	6.71098	0.18821	0.38241			0.99838		2736.67	63.6646	2750.36	150.258	2726.57	6.29912			-0.872427	2726.57	6.29912
150413-03_4	Price Canyon	U. Castlegate	14.6394	3.29404	0.542341	3.12001	0.195772	1.05653			0.947167		2792.1	31.311	2793.24	70.7245	2791.26	17.2941			-0.0709746	2791.26	17.2941
150413-03_65	Price Canyon	U. Castlegate	29.5767	4.67206	0.677411	4.33327	0.316662	1.7467			0.927485		3472.85	45.8956	3334.42	112.813	3553.69	26.8849			6.17034	3553.69	26.8849
061914-02_384	Price Canyon	L. Castlegate	0.0983645	15.6378	0.0146768	10.6099	0.0485778	11.5003	0.00491373	14.7278	0.677613		95.2655	14.2208	93.9252	9.8931	127.504	270.649	99.0741	14.561	1.40687	93.9252	9.8931
061914-02_125	Price Canyon	L. Castlegate	0.120684	20.9008	0.0166738	13.9775	0.0524474	15.5516	0.00550858	18.371	0.668105		115.692	22.8578	106.6	14.7775	304.965	354.294	111.035	20.3526	7.85892	106.6	14.7775
061914-02_394	Price Canyon	L. Castlegate	0.160348	14.6151	0.0240715	7.73963	0.0482553	12.418	0.00706194	14.4365	0.527318		151.008	20.51	153.336	11.7277	111.807	293.098	142.236	20.4721	-1.54199	153.336	11.7277
061914-02_256	Price Canyon	L. Castlegate	0.198802	13.7018	0.0257633	6.88934	0.055875	11.8614	0.00894413	12.961	0.500598		184.112	23.0757	163.978	11.1545	447.405	263.53	179.977	23.2366	10.9357	163.978	11.1545
061914-02_31	Price Canyon	L. Castlegate	0.217972	11.6311	0.0271538	6.33225	0.0581606	9.77468	0.00910241	12.1292	0.541988		200.221	21.1387	172.71	10.7913	535.816	213.923	183.148	22.1262	13.74	172.71	10.7913
061914-02_381	Price Canyon	L. Castlegate	0.250009	13.0723	0.0337469	8.84914	0.0536933	9.63668	0.0111398	11.5659	0.675692		226.583	26.5535	213.956	18.6226	358.208	217.502	223.916	25.7715	5.57286	213.956	18.6226
061914-02_164	Price Canyon	L. Castlegate	0.256971	10.4879	0.0342179	6.23205	0.0543875	8.46146	0.0105577	10.0973	0.590861		232.223	21.7743	216.893	13.292	387.13	189.998	212.276	21.3332	6.60148	216.893	13.292
061914-02_364	Price Canyon	L. Castlegate	0.292075	13.5965	0.0382545	8.44425	0.0553148	10.6833	0.0127981	11.4937	0.618567		260.191	31.2178	242.004	20.0567	424.969	238.291	257.037	29.3773	6.98978	242.004	20.0567
061914-02_207	Price Canyon	L. Castlegate	0.326713	16.7946	0.0403158	6.18819	0.0586832	15.6296	0.0128058	10.3476	0.365961		287.053	42.0181	254.79	15.4594	555.364	340.922	257.191	26.4617	11.2395	254.79	15.4594
061914-02_217	Price Canyon	L. Castlegate	0.333543	12.5015	0.042324	8.77674	0.0570687	8.92995	0.0106397	11.5548	0.699833		292.267	31.7599	267.222	22.974	494.187	196.839	213.915	24.6021	8.56919	267.222	22.974
061914-02_40	Price Canyon	L. Castlegate	0.331995	6.87459	0.045458	4.76704	0.0529175	4.99153	0.0139435	7.57513	0.68763		291.088	17.4	286.576	13.362	325.261	113.301	279.883	21.0663	1.55024	286.576	13.362
061914-02_286	Price Canyon	L. Castlegate	0.386316	8.08225	0.0522544	5.13969	0.0535206	6.27671	0.016714	7.89969	0.630017		331.675	22.8727	328.347	16.4535	350.933	141.851	335.035	26.2656	1.00327	328.347	16.4535
061914-02_225	Price Canyon	L. Castlegate	0.455504	15.769	0.052475	9.7059	0.0628984	12.4394	0.0164736	10.2394	0.614583		381.126	50.1493	329.699	31.1959	704.797	264.658	330.255	33.5693	13.4935	329.699	31.1959
061914-02_112	Price Canyon	L. Castlegate	0.416119	9.88548	0.053193	6.19831	0.056694	7.72663	0.0183327	10.0998	0.623771		353.272	29.5031	334.095	20.1808	479.651	170.744	367.19	36.7839	5.42855	334.095	20.1808
061914-02_47	Price Canyon	L. Castlegate	0.397157	11.8463	0.0539876	8.26768	0.0532976	8.50732	0.0173804	8.60006	0.695901		339.584	34.2053	338.957	27.3	341.487	192.587	348.279	29.7174	0.18469	338.957	27.3
061914-02_282	Price Canyon	L. Castlegate	0.383313	10.2542	0.0540586	6.59715	0.0513222	7.88314	0.016163	9.14469	0.639534		329.473	28.859	339.391	21.811	255.33	181.217	324.079	29.4211	-3.01025	339.391	21.811
061914-02_204	Price Canyon	L. Castlegate	0.427763	9.37316	0.0544567	6.71061	0.0568916	6.58128	0.0176496	9.36415	0.712049		361.587	28.5218	341.826	22.3411	487.334	145.241	353.625	32.8527	5.46523	341.826	22.3411
061914-02_62	Price Canyon	L. Castlegate	0.405824	15.3364	0.0546448	11.4607	0.0538087	10.2103	0.0161491	15.2752	0.746167		345.863	44.9824	342.975	38.2804	363.05	230.251	323.801	49.1267	0.834963	342.975	38.2804
061914-02_28	Price Canyon	L. Castlegate	0.400712	8.53801	0.0550228	5.6946	0.0527642	6.3901	0.0170281	8.17959	0.663225		342.164	24.806	345.285	19.1453	318.673	145.219	341.279	27.6999	-0.912102	345.285	19.1453
061914-02_90	Price Canyon	L. Castlegate	0.410798	11.2933	0.0556451	8.34911	0.0534821	7.63049	0.0164663	10.1414	0.73721		349.45	33.4018	349.087	28.3707	349.306	172.496	330.109	33.2332	0.10385	349.087	28.3707
061914-02_75	Price Canyon	L. Castlegate	0.466573	11.2407	0.0592834	5.0404	0.0570247	10.0661	0.0178525	8.34819	0.445076		388.819	36.3267	371.266	18.1846	492.49	221.948	357.656	29.6169	4.51446	371.266	18.1846
061914-02_221	Price Canyon	L. Castlegate	0.472061	12.2301	0.0619986	9.56909	0.0551537	7.64166	0.0198036	10.6808	0.780767		392.612	39.8433	387.768	36.0123	418.458	170.643	396.364	41.9658	1.23362	387.768	36.0123
061914-02_133	Price Canyon	L. Castlegate	0.485605	13.783	0.0620208	9.82486	0.0567253	9.68435	0.0207603	9.94163	0.711558		401.911	45.7771	387.904	36.9874	480.87	213.961	415.315	40.9091	3.48523	387.904	36.9874
061914-02_310	Price Canyon	L. Castlegate	0.585401	15.044	0.0621406	7.70558	0.0682776	12.9414	0.0221546	12.195	0.509895		467.927	56.4617	388.63	29.0616	876.992	267.908	442.906	53.4959	16.9463	388.63	29.0616
061914-02_211	Price Canyon	L. Castlegate	0.471235	10.2781	0.0631052	6.37904	0.0540693	8.09199	0.0189913	8.81053	0.616575		392.041	33.439	394.482	24.4098	373.937	182.128	380.257	33.2167	-0.622579	394.482	24.4098
061914-02_246	Price Canyon	L. Castlegate	0.555465	9.07213	0.063665	6.12083	0.0632293	6.72111	0.0381248	9.61574	0.671675		448.57	32.907	397.876	23.6171	715.951	142.738	756.26	71.5027	11.3014	397.876	23.6171
061914-02_223	Price Canyon	L. Castlegate	0.498637	11.3377	0.0642968	7.66934	0.0561856	8.36995	0.0210922	11.0645	0.674539		410.779	38.322	401.704	29.868	459.71	185.56	421.887	46.2485	2.20931	401.704	29.868
061914-02_251	Price Canyon	L. Castlegate	0.524827	8.53283	0.0654754	4.87547	0.0580654	7.02984	0.0315212	39.6531	0.566815		428.371	29.8294	408.839	19.3139	532.231	153.945	627.279	246.411	4.55967	408.839	19.3139
061914-02_80	Price Canyon	L. Castlegate	0.516014	10.6258	0.065519	7.28271	0.0570617	7.76134	0.0198223	10.1698	0.682997		422.485	36.74	409.103	28.8683	493.918	171.088	396.734	39.9933	3.16768	409.103	28.8683
061914-02_236	Price Canyon	L. Castlegate	0.491215	8.69347	0.0661078	5.49995	0.0538681	6.74914	0.0250622	35.4852	0.630311		405.738	29.0853	412.663	21.9852	365.541	152.131	500.319	176.125	-1.70683	412.663	21.9852
061914-02_200	Price Canyon	L. Castlegate	0.525342	12.6826	0.0667401	8.5774	0.0570439	9.36189	0.0221747	9.65976	0.674616		428.714	44.3801	416.486	34.5944	493.232	206.395	443.302	42.4002	2.85229	416.486	34.5944
061914-02_392	Price Canyon	L. Castlegate	0.527144	12.0823	0.0669982	7.97613	0.0570039	9.09966	0.021681	9.4372	0.657862		429.913	42.3721	418.045	32.286	491.685	200.667	433.538	40.5188	2.7604	418.045	32.286
061914-02_383	Price Canyon	L. Castlegate	0.528708	8.20675	0.0674016	5.16622	0.0568557	6.39905	0.0210409	8.79755	0.626126		430.952	28.8277	420.482	21.0298	485.941	141.253	420.871	36.6768	2.42946	420.482	21.0298
061914-02_197	Price Canyon	L. Castlegate	0.509637	13.2446	0.0678366	9.3378	0.0544614	9.40838	0.0198149	10.7832	0.703845		418.205	45.4305	423.109	38.2408	390.18	211.146	396.587	42.3925	-1.17253	423.109	38.2408
061914-02_66	Price Canyon	L. Castlegate	0.636312	21.0577	0.0693072	13.4077	0.0665234	16.2497	0.026287	21.6759	0.636019		500.02	83.3331	431.98	56.0223	822.888	339.243	524.456	112.531	13.6074	431.98	56.0223
061914-02_185	Price Canyon	L. Castlegate	0.494465	9.36156	0.0695647	5.82264	0.0515607	7.32554	0.0187593	9.53928	0.622635		407.949	31.4606	433.533	24.413	265.976	168.072	375.655	35.535	-6.27141	433.533	24.413
061914-02_254	Price Canyon	L. Castlegate	0.546212	20.5771	0.0706103	14.7155	0.0560213	14.3971	0.0228333	15.4466	0.714473		442.512	73.939	439.832	62.5669	453.214	319.542	456.321	69.817	0.605729	439.832	62.5669
061914-02_396	Price Canyon	L. Castlegate	0.604406	12.4381	0.0715502	7.69994	0.0611874	9.79656	0.0231659	9.91201	0.616163		480.026	47.6121	445.489	33.1442	645.829	210.463	462.893	45.4116	7.19489	445.489	33.1442
061914-02_29	Price Canyon	L. Castlegate	0.559971	6.69409	0.0717079	4.34079	0.0565782	5.13128	0.0227737	7.79481	0.642228		451.507	24.4036	446.437	18.7231	475.131	113.454	455.145	35.1117	1.12292	446.437	18.7231
061914-02_106	Price Canyon	L. Castlegate	0.572651	12.4407	0.0718043	8.92258	0.0577958	8.6919	0.0210266	17.9873	0.715447		459.728	46.0286	447.017	38.5344	522.031	190.676	420.589	75.0099	2.76485	447.017	38.5344
061914-02_14	Price Canyon	L. Castlegate	0.57856	9.55962	0.07191	5.45479	0.058299	7.8753	0.0242887	10.5014	0.56688		463.535	35.5906	447.653	23.59	541.018	172.201	485.062	50.3949	3.42642	447.653	23.59
061914-02_174	Price Canyon	L. Castlegate	0.616327	18.0259	0.0722829	14.1225	0.061753	11.2105	0.0291765	25.3876	0.78309		487.543	69.9028	449.895	61.3716	665.565	240.053	581.284	145.998	7.72198	449.895	61.3716
061914-02_145	Price Canyon	L. Castlegate	0.629768	12.3612	0.0729687	7.2961	0.0625579	9.99936	0.023851	9.79339	0.587912		495.951	48.5375	454.016	31.9861	693.237	213.147	476.423	46.165	8.45546	454.016	31.9861
061914-02_358	Price Canyon	L. Castlegate	0.560758	12.4802	0.0732437	8.82211	0.0554892	8.852	0.0239662	10.9778	0.704927		452.02	45.5599	455.668	38.8122	431.989	197.201	478.697	51.9996	-0.807125	455.668	38.8122
061914-02_382	Price Canyon	L. Castlegate	0.569836	7.49263	0.0736471	5.1772	0.0560809	5.44277	0.0224853	8.71067	0.687265		457.909	27.6227	458.091	22.8933	455.571	120.752	449.443	38.7546	-0.0398279	458.091	22.8933
061914-02_141	Price Canyon	L. Castlegate	0.597895	10.8401	0.0745233	7.44902	0.05814	7.89923	0.0230177	10.5367	0.684831		475.897	41.2076	463.35	33.3041	535.042	172.901	459.966	47.975	2.63649	463.35	33.3041
061914-02_129	Price Canyon	L. Castlegate	0.588766	15.5261	0.0760415	10.8785	0.0560994	11.0941	0.0249873	12.4433	0.699594		470.08	58.4866	472.452	49.5585	456.305	246.099	498.843	61.4061	-0.504604	472.452	49.5585
061914-02_84	Price Canyon	L. Castlegate	0.58292	11.166	0.0767132	7.70987	0.0550496	8.1	0.023726	10.3968	0.688312		466.336	41.7755	476.474	35.4111	414.237	181.012	473.954	48.7615	-2.1739	476.474	35.4111
061914-02_10	Price Canyon	L. Castlegate	0.737161	10.3054	0.0882816	5.44008	0.0605073	8.7736	0.0292713	9.3793	0.524595		560.747	44.4319	545.366	28.4482	621.763	189.243	583.144	53.9854	2.74299	545.366	28.4482
061914-02_263	Price Canyon	L. Castlegate	0.696335	16.3861	0.0886257	11.3639	0.0568354	11.8286	0.0265985	18.0757	0.692032		536.599	68.402	547.404	59.6403	485.152	261.142	530.59	94.8821	-2.01358	547.404	59.6403
061914-02_235	Price Canyon	L. Castlegate	0.725527	9.24993	0.0892311	6.52537	0.0589446	6.57263	0.0270988	9.60212	0.703639		553.925	39.5111	550.988	34.4607	565.049	143.13	540.437	51.2708	0.53008	550.988	34.4607
061914-02_56	Price Canyon	L. Castlegate	0.793811	9.2929	0.0904009	5.30773	0.0636155	7.6535	0.0274495	9.01272	0.567206		593.331	41.7798	557.908	28.3672	728.871	162.198	547.337	48.7267	5.97024	557.908	28.3672
061914-02_57	Price Canyon	L. Castlegate	0.747844	8.36863	0.0911851	5.54463	0.0594167	6.29931	0.0266739	8.21528	0.658344		566.973	36.3729	562.542	29.8689	582.398	136.776	532.073	43.1871	0.781436	562.542	29.8689
061914-02_257	Price Canyon	L. Castlegate	0.958834	24.1333	0.0953354	11.3754	0.0728218	21.2941	0.0332804	12.9663	0.470588		682.692	120.51	587.014	63.8273	1009	431.916	661.72	84.588	14.0148	587.014	63.8273
061914-02_258	Price Canyon	L. Castlegate	1.00186	16.5818	0.0960064	7.79749	0.0755528	14.6487	0.0345723	11.1535	0.468585		704.752	84.4568	590.962	44.0318	1083.25	293.774	686.974	75.4749	16.1461	590.962	44.0318
061914-02_393	Price Canyon	L. Castlegate	0.816108	8.66261	0.0961318	5.88783	0.0615022	6.39141	0.03063	8.81382	0.675019		605.875	39.5461	591.7	33.2875	656.842	137.058	609.808	53.0141	2.33958	591.7	33.2875
061914-02_20	Price Canyon	L. Castlegate	0.809062	7.57112	0.0975404	5.05151	0.0601001	5.67478	0.0297874	12.4876	0.661992		601.928	34.3942	599.978	28.9405	607.181	122.702	593.276	73.1412	0.323829	599.978	28.9405
061914-02_239	Price Canyon	L. Castlegate	0.820553	11.2683	0.0987876	7.84488	0.0602172	8.10421	0.0310773	10.2343	0.694801		608.357	51.6139	607.3	45.4674	611.388	175.109	618.579	62.4448	0.668669	607.3	45.4674
061914-02_99	Price Canyon	L. Castlegate	0.864668	20.4087	0.100842	14.4455	0.0621275	14.4308	0.0321661	17.1612	0.707121		632.668	96.3817	619.341	85.3083	678.5	308.354	639.912	108.387	8.71909	619.341	85.3083
061914-02_212	Price Canyon	L. Castlegate	0.85334	12.7801	0.101138	9.13831	0.0610922	8.96401	0.0276345	11.5582	0.712768		626.481	59.8182	621.077	54.1089	642.482	192.684	550.977	62.9208	3.3315	621.077	54.1089
061914-02_138	Price Canyon	L. Castlegate	0.904956	12.4583	0.101386	7.72357	0.0646706	9.79302	0.0325656	9.64195	0.618146		654.373	60.1643	622.526	45.8333	763.638	206.381	647.733	61.5577	18.479	622.526	45.8333
061914-02_356	Price Canyon	L. Castlegate	0.873746	13.1174	0.104395	9.35431	0.0606649	9.21589	0.0365202	12.5679	0.711617		637.599	62.1864	640.115	57.0029	627.374	198.598	724.995	89.7004	-2.03085	640.115	57.0029
061914-02_218	Price Canyon	L. Castlegate	0.898026	11.127	0.105949	6.83132	0.061382	8.81007	0.0321643	8.83771	0.610823		650.672	53.5053	649.179	42.1883	652.648	189.056	639.875	55.7414	0.531443	649.179	42.1883
061914-02_102	Price Canyon	L. Castlegate	0.992888	10.9217	0.11258	6.21081	0.0639111	9.00582	0.0377871	10.6258	0.565754		700.193	55.3054	687.716	40.5138	738.691	190.555	749.685	78.3528	6.90068	687.716	40.5138
061914-02_231	Price Canyon	L. Castlegate	1.40769	19.7225	0.145056	13.913	0.0703444	13.9863	0.0487282	14.6582	0.70505		892.183	117.607	873.187	113.629	938.422	286.764	961.661	138.132	6.95155	873.187	113.629
061914-02_155	Price Canyon	L. Castlegate	1.58105	19.5128	0.150929	14.5063	0.0759359	13.0699	0.0476985	10.8546	0.742532		962.784	121.949	906.167	122.645	1093.38	261.715	941.805	100.132	17.1225	906.167	122.645
061914-02_180	Price Canyon	L. Castlegate	1.423	9.05058	0.151451	6.12341	0.0680883	6.66547	0.0427417	10.2892	0.676471		898.622	54.0216	909.094	51.9216	871.244	138.109	845.952	85.4253	-4.34432	909.094	51.9216
061914-02_69	Price Canyon	L. Castlegate	1.55931	8.96688	0.151711	7.46448	0.0744745	5.00771	0.035105	14.3005	0.829532		954.195	55.5282	910.545	63.3876	1054.35	100.864	697.379	98.2667	13.6395	910.545	63.3876
061914-02_43	Price Canyon	L. Castlegate	1.49829	8.48316	0.155995	5.71286	0.0695905	6.30235	0.0452363	7.98397	0.669387		929.692	51.703	934.48	49.6975	916.295	129.653	894.25	69.9612	-1.98465	934.48	49.6975
061914-02_172	Price Canyon	L. Castlegate	1.56388	18.3553	0.156492	11.2444	0.0723668	14.5165	0.0463576	13.6084	0.611999		956.006	114.162	937.25	98.0922	996.273	294.996	915.92	122.229	5.9244	937.25	98.0922
061914-02_188	Price Canyon	L. Castlegate	1.52807	10.8646	0.158232	6.8059	0.0700556	8.468	0.045846	11.5675	0.626514		941.725	66.7767	946.945	59.9398	929.984	173.843	906.036	102.752	-1.82379	946.945	59.9398
061914-02_166	Price Canyon	L. Castlegate	1.57934	8.03881	0.159153	5.58058	0.0718594	5.82123	0.0479343	8.56918	0.689667		962.11	50.0196	952.07	49.3948	981.96	118.547	946.355	79.3814	3.0439	952.07	49.3948
061914-02_359	Price Canyon	L. Castlegate	1.53453	9.71761	0.15956	7.43666	0.0697006	6.29204	0.0595124	9.8047	0.762082		944.314	59.8093	954.33	65.9692	919.547	129.377	1168.44	111.622	-3.7827	954.33	65.9692
061914-02_105	Price Canyon	L. Castlegate	1.65818	10.9597	0.160439	6.29631	0.0748989	8.99242	0.0512032	11.2209	0.571655		992.682	69.5271	959.217	56.1181	1065.79	180.812	1009.31	110.775	9.99929	959.217	56.1181
061914-02_360	Price Canyon	L. Castlegate	1.627	12.0449	0.160453	9.42894	0.0734858	7.52768	0.0595752	11.0138	0.780653		980.699	75.887	959.296	84.0479	1027.38	152.276	1169.64	125.555	6.62704	959.296	84.0479
061914-02_09	Price Canyon	L. Castlegate	1.59864	10.351	0.160604	7.73039	0.072129	6.91029	0.0507958	10.3697	0.744527		969.677	64.7448	960.134	68.9619	989.583	140.567	1001.47	101.574	2.97588	960.134	68.9619
061914-02_22	Price Canyon	L. Castlegate	1.65142	8.25342	0.162936	5.26115	0.0734353	6.38971	0.0491667	9.16721	0.63297		990.097	52.2428	973.072	47.519	1025.99	129.282	970.111	87.0187	5.15773	973.072	47.519
061914-02_08	Price Canyon	L. Castlegate	1.64531	8.15759	0.163324	5.64527	0.0729992	5.91992	0.049838	10.1573	0.688029		987.753	51.5628	975.223	51.093	1013.93	119.989	983.039	97.6963	3.81749	975.223	51.093
061914-02_199	Price Canyon	L. Castlegate	1.61381	13.0765	0.163959	9.44968	0.0713379	9.05774	0.0479231	10.7485	0.721255		975.588	82.1575	978.74	85.814	967.112	184.913	946.139	99.5968	-1.20238	978.74	85.814
061914-02_332	Price Canyon	L. Castlegate	1.71099	10.6685	0.164061	7.74068	0.075518	7.35182	0.0571087	9.35454	0.724651		1012.66	68.4714	979.305	70.3305	1082.32	147.458	1122.54	102.405	9.51815	979.305	70.3305
061914-02_110	Price Canyon	L. Castlegate	1.8132	11.2361	0.164444	7.22527	0.0799092	8.62784	0.0533017	10.4454	0.640616		1050.23	73.6636	981.424	65.7788	1194.75	170.206	1049.61	107.122	17.8551	981.424	65.7788
061914-02_232	Price Canyon	L. Castlegate	1.64559	13.8849	0.164511	9.64357	0.0725105	10.0002	0.0723358	30.5602	0.693744		987.861	87.9137	981.796	87.8281	1000.3	203.099	1411.61	421.025	1.85014	981.796	87.8281
061914-02_82	Price Canyon	L. Castlegate	1.65307	12.7286	0.164818	8.70444	0.0726627	9.30695	0.0567206	23.8625	0.682183		990.727	80.6987	983.498	79.4014	1004.56	188.9	1115.11	260.559	2.09672	983.498	79.4014
061914-02_387	Price Canyon	L. Castlegate	1.69124	8.58525	0.165136	5.67365	0.0742278	6.4663	0.0541543	9.55374	0.657813		1005.23	54.835	985.256	51.8389	1047.67	130.374	1065.97	99.4453	5.95729	985.256	51.8389
061914-02_345	Price Canyon	L. Castlegate	1.63937	7.05481	0.167959	5.01962	0.0707272	4.97871	0.05849	7.942	0.708498		985.47	44.5215	1000.85	46.5341	949.541	101.908	1148.93	88.8984	-5.40411	1000.85	46.5341
061914-02_255	Price Canyon	L. Castlegate	1.68802	15.3409	0.168425	10.8153	0.072577	10.8988	0.0524645	10.6325	0.703757		1004.01	98.124	1003.43	100.507	1002.16	221.288	1033.54	107.414	-0.125986	1003.43	100.507
061914-02_169	Price Canyon	L. Castlegate	1.85747	9.31079	0.168427	6.08751	0.0798546	7.06969	0.0542387	16.0404	0.650748		1066.09	61.5301	1003.44	56.569	1193.4	139.495	1067.59	167.493	15.9178	1003.44	56.569
061914-02_67	Price Canyon	L. Castlegate	1.69366	11.2271	0.168709	7.97789	0.0727401	7.9243	0.0496817	9.88754	0.708398		1006.14	71.7967	1004.99	74.2431	1006.72	160.785	980.031	94.8113	0.171738	1004.99	74.2431
061914-02_30	Price Canyon	L. Castlegate	1.80595	11.141	0.168932	7.50509	0.0774546	8.25558	0.0563625	9.15447	0.671497		1047.61	72.9331	1006.22	69.9221	1132.92	164.344	1108.27	98.9663	11.183	1006.22	69.9221
061914-02_71	Price Canyon	L. Castlegate	1.68745	21.9498	0.168943	16.1157	0.0723733	14.9152	0.0520353	8.21651	0.733662		1003.8	140.839	1006.29	150.174	996.457	303.091	1025.3	82.3101	-0.986555	1006.29	150.174
061914-02_320	Price Canyon	L. Castlegate	1.69834	9.02353	0.169233	6.34424	0.0727132	6.4499	0.0548119	15.4184	0.699353		1007.91	57.7301	1007.88	59.1961	1005.97	130.884	1078.57	162.592	-0.1901	1007.88	59.1961
061914-02_19	Price Canyon	L. Castlegate	1.73283	8.89999	0.169664	6.074	0.074003	6.53577	0.0531163	9.00149	0.678773		1020.8	57.362	1010.26	56.7978	1041.55	131.897	1046.06	91.9746	3.00449	1010.26	56.7978
061914-02_49	Price Canyon	L. Castlegate	1.65794	7.40183	0.170055	5.35805	0.070633	5.14495	0.0483013	7.70888	0.718938		992.591	46.9139	1012.41	50.2014	946.811	105.354	953.432	71.9202	-6.9287	1012.41	50.2014
061914-02_135	Price Canyon	L. Castlegate	1.65588	9.44361	0.17051	6.635	0.0703577	6.74534	0.052237	8.84672	0.69987		991.803	59.8537	1014.92	62.3086	938.809	138.293	1029.17	88.9644	-8.10734	1014.92	62.3086
061914-02_108	Price Canyon	L. Castlegate	1.77428	11.6933	0.170875	8.22633	0.0752503	8.33376	0.0558415	9.42555	0.701474		1036.09	76.0762	1016.93	77.3949	1075.2	167.332	1098.29	101.01	5.41921	1016.93	77.3949
061914-02_233	Price Canyon	L. Castlegate	1.79995	8.86117	0.171329	5.94504	0.0761577	6.58704	0.0542095	9.11489	0.668895		1045.44	57.903	1019.43	56.058	1099.22	131.786	1067.03	94.9586	7.25847	1019.43	56.058
061914-02_150	Price Canyon	L. Castlegate	1.74599	19.1738	0.171475	12.9809	0.0738167	14.1279	0.054403	11.2308	0.67607		1025.68	124.407	1020.23	122.502	1036.46	285.332	1070.74	117.464	1.56567	1020.23	122.502
061914-02_17	Price Canyon	L. Castlegate	1.73943	10.197	0.171619	7.16888	0.0734403	7.27904	0.0528891	9.20772	0.700313		1023.25	65.835	1021.02	67.6961	1026.13	147.273	1041.7	93.7036	0.497432	1021.02	67.6961
061914-02_354	Price Canyon	L. Castlegate	1.74455	9.23372	0.171687	6.49748	0.0736538	6.58458	0.0558809	9.60613	0.701065		1025.15	59.6648	1021.4	61.3765	1032	133.074	1099.05	103.019	1.02686	1021.4	61.3765
061914-02_203	Price Canyon	L. Castlegate	1.74085	8.11313	0.172264	5.81143	0.0731978	5.70309	0.051482	8.47245	0.711261		1023.78	52.3696	1024.57	55.0529	1019.43	115.501	1014.67	84.0193	-0.504084	1024.57	55.0529
061914-02_109	Price Canyon	L. Castlegate	1.72203	20.566	0.172928	14.8759	0.0721674	14.2148	0.0576558	17.5071	0.722684		1016.78	132.86	1028.23	141.405	990.665	289.105	1133	193.824	-3.79143	1028.23	141.405
061914-02_77	Price Canyon	L. Castlegate	1.92692	12.1362	0.173239	8.82219	0.0805909	8.35639	0.0604415	11.42	0.72519		1090.47	81.3003	1029.93	83.9805	1211.49	164.451	1186.16	131.991	14.9861	1029.93	83.9805
061914-02_326	Price Canyon	L. Castlegate	1.70616	11.1934	0.173298	7.93154	0.0713039	7.91002	0.0545063	11.6873	0.707548		1010.84	71.7764	1030.26	75.5233	966.139	161.506	1072.72	122.473	-6.63652	1030.26	75.5233
061914-02_64	Price Canyon	L. Castlegate	1.71122	8.18444	0.173359	5.63116	0.0715211	5.97237	0.0491256	8.70581	0.683756		1012.74	52.4985	1030.59	53.6342	972.344	121.83	969.319	82.5639	-5.99054	1030.59	53.6342
061914-02_328	Price Canyon	L. Castlegate	1.73031	11.431	0.173601	7.59486	0.0721812	8.55242	0.0592416	10.5369	0.663501		1019.87	73.6866	1031.92	72.4248	991.054	173.932	1163.28	119.465	-4.1234	1031.92	72.4248
061914-02_79	Price Canyon	L. Castlegate	1.81819	8.74918	0.17393	6.00986	0.0757389	6.38748	0.0521659	9.29939	0.683386		1052.03	57.3757	1033.73	57.402	1088.18	128.004	1027.81	93.4058	5.00365	1033.73	57.402
061914-02_229	Price Canyon	L. Castlegate	1.74345	9.25376	0.174186	6.55356	0.0725431	6.55068	0.0514935	9.12061	0.706321		1024.74	59.7808	1035.13	62.6736	1001.22	133.022	1014.89	90.4806	-3.38748	1035.13	62.6736
061914-02_89	Price Canyon	L. Castlegate	1.84421	9.23168	0.174255	6.28257	0.0766706	6.79295	0.0613917	9.91177	0.677175		1061.36	60.8525	1035.51	60.1024	1112.64	135.634	1204.26	116.211	6.93134	1035.51	60.1024
061914-02_06	Price Canyon	L. Castlegate	1.97086	14.5183	0.174319	6.75683	0.0819288	12.8647	0.058957	13.2854	0.463492		1105.6	98.0998	1035.86	64.6598	1243.82	251.999	1157.85	150.058	16.7189	1035.86	64.6598
061914-02_74	Price Canyon	L. Castlegate	1.89466	8.37314	0.174322	4.80382	0.0787518	6.88565	0.0527379	8.21883	0.569002		1079.22	55.7041	1035.88	45.9702	1165.9	136.41	1038.79	83.3916	11.1522	1035.88	45.9702
061914-02_260	Price Canyon	L. Castlegate	1.78252	8.95419	0.174552	6.38944	0.0739267	6.30826	0.0564001	9.36898	0.709711		1039.1	58.3082	1037.14	61.2135	1039.47	127.345	1108.98	101.355	0.223569	1037.14	61.2135
061914-02_104	Price Canyon	L. Castlegate	1.8837	13.2737	0.17471	9.02253	0.0781345	9.75587	0.0573677	9.99996	0.678091		1075.37	88.2622	1038.01	86.5089	1150.3	193.714	1127.49	109.96	9.76125	1038.01	86.5089
061914-02_23	Price Canyon	L. Castlegate	1.8455	8.62642	0.174756	6.14099	0.0765142	6.09002	0.0553424	10.1057	0.708249		1061.83	56.8682	1038.26	58.8914	1108.56	121.673	1088.74	107.398	6.34115	1038.26	58.8914
061914-02_35	Price Canyon	L. Castlegate	1.82214	9.26766	0.175152	5.31298	0.0753767	7.61749	0.0537771	9.21506	0.569581		1053.45	60.8306	1040.43	51.0489	1078.56	152.873	1058.74	95.2763	3.53529	1040.43	51.0489
061914-02_352	Price Canyon	L. Castlegate	1.79418	9.7666	0.175318	6.95997	0.0741806	6.87113	0.0831013	51.8257	0.710665		1043.34	63.7609	1041.34	66.9287	1046.38	138.563	1613.51	820.122	0.48164	1041.34	66.9287
061914-02_183	Price Canyon	L. Castlegate	1.80717	10.167	0.175824	7.55162	0.0745505	6.8005	0.0533986	10.1315	0.743368		1048.06	66.5538	1044.12	72.7969	1056.41	136.932	1051.48	104.075	1.16309	1044.12	72.7969
061914-02_391	Price Canyon	L. Castlegate	1.83261	20.8221	0.175947	14.92	0.0754667	14.5382	0.0556942	15.9141	0.715894		1057.21	137.621	1044.8	143.931	1080.96	291.657	1095.47	170.411	3.34533	1044.8	143.931
061914-02_55	Price Canyon	L. Castlegate	1.76665	8.49158	0.176549	6.17548	0.072494	5.86176	0.0528296	19.6641	0.723531		1033.29	55.1113	1048.09	59.7388	999.841	119.057	1040.55	200.428	-4.82605	1048.09	59.7388
061914-02_379	Price Canyon	L. Castlegate	1.79528	8.48782	0.1766	5.91987	0.0736671	6.10681	0.0521439	9.07306	0.69452		1043.75	55.4069	1048.38	57.2802	1032.36	123.411	1027.39	91.0908	-1.55105	1048.38	57.2802
061914-02_224	Price Canyon	L. Castlegate	1.81972	8.6113	0.177155	5.78009	0.0744253	6.40681	0.0509768	9.21695	0.668185		1052.58	56.4865	1051.41	56.077	1053.02	129.07	1004.95	90.5636	0.152702	1051.41	56.077
061914-02_158	Price Canyon	L. Castlegate	1.88101	18.1068	0.177527	13.252	0.0767923	12.3591	0.0576034	10.136	0.730823		1074.42	120.602	1053.45	128.81	1115.8	246.658	1131.99	111.894	5.58802	1053.45	128.81
061914-02_59	Price Canyon	L. Castlegate	1.78611	7.8543	0.177528	5.52172	0.0728902	5.62066	0.0530265	9.13633	0.69851		1040.41	51.1699	1053.45	53.6658	1010.9	113.974	1044.33	93.2053	-4.20939	1053.45	53.6658
061914-02_122	Price Canyon	L. Castlegate	1.92468	10.2723	0.177997	6.4924	0.0783576	7.98495	0.0600353	9.93221	0.629102		1089.69	68.7449	1056.03	63.2422	1155.96	158.419	1178.42	114.017	8.64479	1056.03	63.2422
061914-02_289	Price Canyon	L. Castlegate	1.96922	6.99852	0.178132	4.69324	0.0800416	5.23632	0.0607341	12.8502	0.663507		1105.04	47.1629	1056.76	45.7454	1198.01	103.251	1191.74	149.263	11.7904	1056.76	45.7454
061914-02_156	Price Canyon	L. Castlegate	1.98666	8.07567	0.17867	5.68975	0.080597	5.77496	0.0595704	7.66947	0.699038		1110.99	54.5964	1059.71	55.6009	1211.64	113.647	1169.55	87.341	12.5392	1059.71	55.6009
061914-02_161	Price Canyon	L. Castlegate	1.92721	11.0306	0.178878	7.26282	0.0780489	8.33106	0.0564667	10.0146	0.65542		1090.57	73.87	1060.84	71.0442	1148.12	165.476	1110.26	108.48	7.60173	1060.84	71.0442
061914-02_208	Price Canyon	L. Castlegate	1.91767	10.4205	0.178929	6.75746	0.0776066	7.96556	0.0580727	10.3617	0.644737		1087.26	69.6523	1061.12	66.1165	1136.82	158.479	1140.96	115.276	6.65873	1061.12	66.1165
061914-02_395	Price Canyon	L. Castlegate	1.97467	13.6997	0.179429	9.89157	0.0797194	9.50661	0.0578044	10.5732	0.720048		1106.9	92.5976	1063.85	97.0146	1190.05	187.67	1135.83	117.121	10.6045	1063.85	97.0146
061914-02_92	Price Canyon	L. Castlegate	1.93225	17.4151	0.179802	12.0057	0.0778553	12.6314	0.0547094	12.3473	0.68842		1092.32	117.04	1065.89	117.961	1143.18	251.073	1076.61	129.87	6.76119	1065.89	117.961
061914-02_50	Price Canyon	L. Castlegate	1.91299	7.8766	0.179948	5.6095	0.077017	5.56469	0.0496422	8.54729	0.707742		1085.63	52.569	1066.69	55.149	1121.63	110.962	979.27	81.8713	4.89814	1066.69	55.149
061914-02_305	Price Canyon	L. Castlegate	1.85868	7.84713	0.180133	5.52019	0.0747791	5.61788	0.0543127	8.78	0.698207		1066.52	51.851	1067.7	54.3181	1062.57	113.014	1069.01	91.6272	-0.48291	1067.7	54.3181
061914-02_253	Price Canyon	L. Castlegate	1.83706	7.99215	0.180152	5.76118	0.0738542	5.57505	0.0538361	10.3238	0.716535		1058.81	52.594	1067.8	56.6946	1037.49	112.578	1059.87	106.881	-2.92208	1067.8	56.6946
061914-02_365	Price Canyon	L. Castlegate	2.09643	12.7386	0.180494	7.22516	0.0841452	10.518	0.0590948	14.9431	0.564149		1147.64	87.791	1069.67	71.2168	1295.91	204.508	1160.48	169.233	17.4578	1069.67	71.2168
061914-02_238	Price Canyon	L. Castlegate	1.82537	11.3215	0.180599	7.74251	0.0732745	8.2745	0.0509394	9.52672	0.682522		1054.62	74.4022	1070.25	76.3542	1021.55	167.526	1004.23	93.5488	-4.76639	1070.25	76.3542
061914-02_388	Price Canyon	L. Castlegate	2.01518	13.6267	0.180866	8.76914	0.0807492	10.445	0.0640517	12.757	0.642236		1120.64	92.7315	1071.71	86.5881	1215.35	205.44	1254.86	155.813	11.819	1071.71	86.5881
061914-02_86	Price Canyon	L. Castlegate	1.85159	12.6546	0.181721	8.67979	0.0738153	9.22921	0.0553923	10.7777	0.684178		1063.99	83.6211	1076.37	86.0487	1036.42	186.397	1089.69	114.659	-3.8545	1076.37	86.0487
061914-02_283	Price Canyon	L. Castlegate	1.82747	7.64936	0.182165	5.38858	0.0726143	5.47608	0.052259	7.69225	0.698243		1055.37	50.2414	1078.79	53.5292	1003.21	111.168	1029.6	77.3636	-7.53421	1078.79	53.5292
061914-02_101	Price Canyon	L. Castlegate	1.91347	8.82874	0.182212	6.04558	0.0760989	6.46484	0.0569512	9.65309	0.681047		1085.8	58.9424	1079.05	60.069	1097.67	129.371	1119.53	105.405	1.69698	1079.05	60.069
061914-02_209	Price Canyon	L. Castlegate	1.96568	10.2058	0.182356	7.22651	0.0780522	7.24341	0.0561584	10.0884	0.704477		1103.83	68.7905	1079.83	71.8517	1148.2	143.87	1104.36	108.715	5.95438	1079.83	71.8517
061914-02_148	Price Canyon	L. Castlegate	2.05879	19.6958	0.182696	13.718	0.0816912	14.1489	0.0554728	12.9326	0.69566		1135.22	135.403	1081.69	136.625	1238.12	277.379	1091.23	137.852	12.635	1081.69	136.625
061914-02_244	Price Canyon	L. Castlegate	1.91273	8.87511	0.182739	6.37373	0.0758637	6.20165	0.0599023	10.0209	0.715353		1085.54	59.2447	1081.92	63.4845	1091.48	124.219	1175.88	114.797	0.875572	1081.92	63.4845
061914-02_37	Price Canyon	L. Castlegate	1.9143	8.40962	0.183777	5.95529	0.0754733	5.96878	0.0556335	8.79893	0.704457		1086.08	56.1467	1087.58	59.6012	1081.13	119.739	1094.31	93.9455	-0.595888	1087.58	59.6012
061914-02_159	Price Canyon	L. Castlegate	2.11577	9.62322	0.183804	7.39242	0.0834202	6.20195	0.0589022	9.56324	0.764631		1153.96	66.4465	1087.72	73.9944	1279.07	120.877	1156.8	107.808	14.9597	1087.72	73.9944
061914-02_247	Price Canyon	L. Castlegate	1.94789	14.2621	0.183933	10.115	0.0767434	10.0714	0.0615362	10.5854	0.708042		1097.72	95.9744	1088.42	101.31	1114.53	201.04	1207.01	124.41	2.34216	1088.42	101.31
061914-02_116	Price Canyon	L. Castlegate	1.95124	17.2087	0.184128	11.5245	0.076801	12.7957	0.0599342	20.0688	0.668674		1098.87	116.03	1089.49	115.534	1116.03	255.362	1176.49	230.678	2.37815	1089.49	115.534
061914-02_327	Price Canyon	L. Castlegate	1.99806	8.21171	0.184358	5.17151	0.07849	6.39191	0.0626346	10.4952	0.627784		1114.85	55.6244	1090.74	51.8948	1159.3	126.751	1227.92	125.425	5.91424	1090.74	51.8948
061914-02_318	Price Canyon	L. Castlegate	1.94982	11.4019	0.185249	8.23901	0.0762699	7.91275	0.050104	16.2233	0.719996		1098.39	76.6712	1095.59	83.0164	1102.16	158.24	988.159	157.065	0.596671	1095.59	83.0164
061914-02_132	Price Canyon	L. Castlegate	2.01459	17.3841	0.187155	13.2762	0.0779866	11.2381	0.0581926	11.0834	0.76295		1120.44	118.497	1105.94	134.943	1146.53	223.269	1143.25	123.571	3.54004	1105.94	134.943
061914-02_136	Price Canyon	L. Castlegate	2.00609	10.0875	0.187286	7.07833	0.0776036	7.2109	0.0579361	9.46918	0.699298		1117.57	68.4573	1106.66	71.981	1136.74	143.467	1138.35	105.086	2.64649	1106.66	71.981
061914-02_274	Price Canyon	L. Castlegate	1.91995	8.04159	0.187291	5.38624	0.0741649	6.01752	0.0564403	8.61392	0.663392		1088.05	53.7392	1106.68	54.7739	1045.96	121.357	1109.75	93.231	-5.80546	1106.68	54.7739
061914-02_168	Price Canyon	L. Castlegate	2.00947	12.344	0.187515	8.56717	0.0775963	8.90769	0.0564281	11.2678	0.692292		1118.71	83.8812	1107.9	87.2124	1136.56	177.231	1109.52	122.016	2.5216	1107.9	87.2124
061914-02_162	Price Canyon	L. Castlegate	2.10561	8.71191	0.187854	6.09487	0.0811928	6.26277	0.0563499	9.08369	0.695154		1150.64	60.0454	1109.74	62.1374	1226.11	122.99	1108.02	98.1784	9.49153	1109.74	62.1374
061914-02_60	Price Canyon	L. Castlegate	1.99354	7.65989	0.188447	5.56082	0.0766418	5.30498	0.0548923	7.89742	0.721369		1113.32	51.8405	1112.96	56.8431	1111.89	105.936	1080.12	83.2333	-0.0964423	1112.96	56.8431
061914-02_21	Price Canyon	L. Castlegate	2.07458	12.2394	0.189093	7.08663	0.0794916	9.99872	0.0594667	10.6602	0.576738		1140.44	84.0471	1116.46	72.6501	1184.4	197.547	1167.57	121.302	5.73655	1116.46	72.6501
061914-02_120	Price Canyon	L. Castlegate	2.0622	8.90067	0.189254	6.21826	0.0789686	6.39981	0.0599215	9.14582	0.694993		1136.35	60.9356	1117.33	63.7926	1171.35	126.684	1176.25	104.778	4.61159	1117.33	63.7926
061914-02_291	Price Canyon	L. Castlegate	2.08538	9.25495	0.190121	4.76302	0.0794539	7.9591	0.057783	7.37779	0.510341		1144.01	63.5986	1122.03	49.0511	1183.47	157.271	1135.43	81.6244	5.19109	1122.03	49.0511
061914-02_226	Price Canyon	L. Castlegate	2.0862	8.23441	0.19035	5.64429	0.0794202	6.01778	0.0586505	8.43489	0.682588		1144.28	56.5775	1123.27	58.1857	1182.63	118.926	1152	94.6737	5.01915	1123.27	58.1857
061914-02_271	Price Canyon	L. Castlegate	1.96804	8.04367	0.190539	5.52883	0.0747207	5.88984	0.054702	8.30354	0.681083		1104.64	54.2077	1124.29	57.0431	1061	118.513	1076.47	87.2343	-5.96569	1124.29	57.0431
061914-02_139	Price Canyon	L. Castlegate	2.0114	9.18896	0.190775	6.47075	0.0763923	6.55128	0.0602194	8.44264	0.70122		1119.36	62.3983	1125.57	66.8314	1105.37	130.95	1181.93	97.1576	-1.82776	1125.57	66.8314
061914-02_304	Price Canyon	L. Castlegate	2.04191	8.69705	0.192648	6.01943	0.0768128	6.31235	0.0572787	9.26584	0.687915		1129.6	59.3453	1135.7	62.6816	1116.33	125.969	1125.79	101.717	-1.73528	1135.7	62.6816
061914-02_143	Price Canyon	L. Castlegate	2.05564	8.67166	0.19287	5.95698	0.077246	6.33333	0.0551846	7.88847	0.683086		1134.17	59.3022	1136.9	62.0911	1127.55	126.178	1085.71	83.559	-0.829733	1136.9	62.0911
061914-02_316	Price Canyon	L. Castlegate	2.12958	9.21458	0.193064	6.36924	0.0799353	6.69916	0.0589742	9.13891	0.686634		1158.45	63.7504	1137.95	66.4445	1195.39	132.146	1158.17	103.132	4.80505	1137.95	66.4445
061914-02_72	Price Canyon	L. Castlegate	2.0099	7.5905	0.193079	5.38546	0.0754271	5.38482	0.0589094	8.16232	0.704806		1118.86	51.5104	1138.03	56.1845	1079.91	108.044	1156.94	91.9901	-5.38236	1138.03	56.1845
061914-02_279	Price Canyon	L. Castlegate	2.13656	8.89717	0.19363	6.27382	0.0798454	6.35152	0.0671581	9.37233	0.700285		1160.71	61.6135	1141.01	65.6099	1193.17	125.328	1313.78	119.568	4.37157	1141.01	65.6099
061914-02_367	Price Canyon	L. Castlegate	2.15033	20.0218	0.195203	14.281	0.0798014	14.0517	0.0661539	15.4386	0.712355		1165.16	139.64	1149.5	150.383	1192.08	277.313	1294.75	194.557	3.5725	1149.5	150.383
061914-02_107	Price Canyon	L. Castlegate	2.15895	8.23136	0.197608	5.77579	0.0791772	5.89806	0.0621143	9.15322	0.697564		1167.93	57.1821	1162.46	61.4374	1176.57	116.663	1218.02	108.486	1.19927	1162.46	61.4374
061914-02_163	Price Canyon	L. Castlegate	2.14699	8.31802	0.197773	5.8403	0.0786252	5.96088	0.0632882	8.56565	0.697477		1164.08	57.6835	1163.34	62.1668	1162.72	118.144	1240.35	103.313	-0.0540581	1163.34	62.1668
061914-02_04	Price Canyon	L. Castlegate	2.43964	12.2461	0.198519	10.8322	0.0890536	5.74609	0.0636641	9.64383	0.883085		1254.37	88.4174	1167.36	115.675	1405.31	110.041	1247.49	117.007	16.9323	1167.36	115.675
061914-02_323	Price Canyon	L. Castlegate	2.15276	8.92801	0.199027	6.26869	0.0783497	6.3771	0.0646473	9.32442	0.699864		1165.94	61.9767	1170.09	67.08	1155.75	126.523	1266.17	114.766	-1.24035	1170.09	67.08
061914-02_179	Price Canyon	L. Castlegate	2.32922	9.42305	0.212619	6.64858	0.079378	6.68045	0.0579481	10.2985	0.705261		1221.24	67.0378	1242.75	75.1526	1181.58	132.042	1138.58	114.338	-5.1775	1181.58	132.042
061914-02_361	Price Canyon	L. Castlegate	2.23946	9.88163	0.203511	7.14359	0.0797337	6.86892	0.0620921	10.3195	0.718905		1193.49	69.4714	1194.15	77.8743	1190.41	135.592	1217.6	122.31	-0.314608	1194.15	77.8743
061914-02_335	Price Canyon	L. Castlegate	2.35553	10.371	0.203616	6.39571	0.0837712	8.17481	0.0758673	9.9073	0.615371		1229.23	74.0536	1194.72	69.7507	1287.24	159.143	1478.06	141.705	7.18788	1194.72	69.7507
061914-02_73	Price Canyon	L. Castlegate	2.48564	8.36239	0.204319	7.01069	0.0881483	4.60014	0.0650885	7.7683	0.835106		1267.86	60.6222	1198.48	76.6772	1385.72	88.3321	1274.54	96.1816	13.5121	1198.48	76.6772
061914-02_05	Price Canyon	L. Castlegate	2.39607	16.0442	0.215854	12.0005	0.0804389	10.6671	0.0672416	10.1765	0.746974		1241.43	115.435	1259.93	137.36	1207.77	210.038	1315.36	130.012	-4.31893	1207.77	210.038
061914-02_153	Price Canyon	L. Castlegate	2.40303	8.63525	0.212366	6.2531	0.0820308	5.99696	0.0636007	8.17428	0.719532		1243.5	61.9922	1241.41	70.6125	1246.25	117.429	1246.29	99.0399	0.388472	1246.25	117.429
061914-02_126	Price Canyon	L. Castlegate	2.50637	10.9876	0.21711	7.59509	0.0836493	7.96344	0.072649	11.3374	0.689001		1273.88	79.913	1266.59	87.343	1284.41	155.091	1417.51	155.801	1.38748	1284.41	155.091
061914-02_13	Price Canyon	L. Castlegate	2.80396	17.0911	0.241839	12.3739	0.0840139	11.8058	0.0683884	8.54183	0.723087		1356.6	128.602	1396.25	155.37	1292.87	229.647	1337.07	110.818	-7.9959	1292.87	229.647
061914-02_314	Price Canyon	L. Castlegate	2.50891	8.70429	0.215625	6.15024	0.0843253	6.20547	0.0640991	9.79675	0.701264		1274.61	63.2758	1258.72	70.3278	1300.07	120.587	1255.76	119.633	3.18075	1300.07	120.587
061914-02_87	Price Canyon	L. Castlegate	2.4872	8.06318	0.212425	5.68087	0.0848226	5.75532	0.064793	8.93578	0.700384		1268.31	58.4588	1241.73	64.1651	1311.49	111.66	1268.93	110.203	5.31909	1311.49	111.66
061914-02_333	Price Canyon	L. Castlegate	2.59507	7.95576	0.220187	5.20832	0.0853423	6.02705	0.0832964	12.3042	0.652756		1299.25	58.3756	1282.87	60.5891	1323.33	116.737	1617.15	192.136	3.05755	1323.33	116.737
061914-02_219	Price Canyon	L. Castlegate	2.70361	9.15121	0.228977	6.48433	0.0855107	6.49279	0.0701671	8.71105	0.704716		1329.45	67.932	1329.14	77.8849	1327.14	125.691	1370.69	115.774	-0.150139	1327.14	125.691
061914-02_290	Price Canyon	L. Castlegate	2.6235	10.6964	0.219882	8.26994	0.0863923	6.81748	0.0723482	7.66945	0.770566		1307.25	78.7933	1281.25	96.1003	1346.97	131.612	1411.84	104.857	4.87921	1346.97	131.612
061914-02_32	Price Canyon	L. Castlegate	2.65596	11.1472	0.221557	7.48637	0.0868558	8.28095	0.0696446	9.6797	0.669439		1316.3	82.4079	1290.09	87.536	1357.3	159.636	1360.82	127.79	4.95133	1357.3	159.636
061914-02_372	Price Canyon	L. Castlegate	2.50805	8.87605	0.207684	6.37868	0.0874856	6.2029	0.0660818	9.96813	0.71529		1274.37	64.5215	1216.47	70.7157	1371.21	119.346	1293.38	125.275	11.2854	1371.21	119.346
061914-02_115	Price Canyon	L. Castlegate	2.5143	10.2604	0.2081	7.21487	0.0875631	7.32283	0.0642843	9.31626	0.700461		1276.17	74.6716	1218.69	80.1194	1372.92	140.861	1259.27	114.059	11.2337	1372.92	140.861
061914-02_346	Price Canyon	L. Castlegate	3.07922	12.8152	0.254599	8.98599	0.0876441	9.14842	0.0890205	9.99915	0.700277		1427.53	98.5326	1462.15	117.567	1374.7	175.935	1723.67	165.887	-6.36179	1374.7	175.935
061914-02_160	Price Canyon	L. Castlegate	2.92932	11.928	0.237842	8.56376	0.0892491	8.33321	0.07105	12.6902	0.715492		1389.52	90.5307	1375.47	106.083	1409.51	159.495	1387.36	170.873	2.41521	1409.51	159.495
061914-02_12	Price Canyon	L. Castlegate	3.14981	9.78081	0.252204	6.72722	0.0904981	7.12658	0.0790442	8.95744	0.684914		1444.95	75.5197	1449.83	87.349	1436.06	135.91	1537.66	133.063	-0.958924	1436.06	135.91
061914-02_248	Price Canyon	L. Castlegate	2.57456	11.9498	0.204691	8.28089	0.0911406	8.63572	0.0674318	13.1428	0.691203		1293.44	87.609	1200.47	90.7084	1449.54	164.391	1318.96	168.514	17.1825	1449.54	164.391
061914-02_41	Price Canyon	L. Castlegate	3.05614	8.37371	0.242869	6.18214	0.0911742	5.68233	0.0665628	7.9731	0.734525		1421.77	64.1483	1401.6	77.8799	1450.24	108.16	1302.5	100.825	3.35432	1450.24	108.16
061914-02_315	Price Canyon	L. Castlegate	2.72006	26.4096	0.215496	22.3436	0.0914744	14.0992	0.0859148	17.7306	0.845569		1333.95	198.567	1258.03	255.496	1456.5	268.144	1665.95	285.544	13.6262	1456.5	268.144
061914-02_81	Price Canyon	L. Castlegate	2.97688	9.20033	0.235458	7.35086	0.0915962	5.5659	0.0766148	8.62243	0.796255		1401.73	70.039	1363.04	90.3173	1459.03	105.816	1492.1	124.403	6.5787	1459.03	105.816
061914-02_53	Price Canyon	L. Castlegate	3.14343	13.0485	0.246396	9.40208	0.0924242	9.06942	0.0734684	11.9895	0.718959		1443.39	100.846	1419.86	119.831	1476.12	172.03	1432.94	166.538	3.81088	1476.12	172.03
061914-02_45	Price Canyon	L. Castlegate	3.28653	7.21463	0.255856	5.23541	0.0930665	5.00354	0.0768119	7.62528	0.72045		1477.87	56.2237	1468.61	68.7609	1489.24	94.7426	1495.8	110.241	1.3855	1489.24	94.7426
061914-02_339	Price Canyon	L. Castlegate	3.66718	15.8595	0.284623	11.358	0.0933162	11.0785	0.101217	15.8091	0.715568		1564.25	127.192	1614.6	162.258	1494.31	209.632	1948.78	295.852	-8.04994	1494.31	209.632
061914-02_380	Price Canyon	L. Castlegate	3.25444	8.1316	0.250692	5.70063	0.0940783	5.8239	0.0781477	9.3252	0.697895		1470.24	63.2413	1442.05	73.6632	1509.69	109.979	1520.86	137.083	4.48053	1509.69	109.979
061914-02_34	Price Canyon	L. Castlegate	3.3982	6.81635	0.26055	4.79906	0.0944986	4.87789	0.0731657	7.53753	0.698515		1503.98	53.5251	1492.66	63.9469	1518.1	92.0121	1427.24	104.136	1.67606	1518.1	92.0121
061914-02_245	Price Canyon	L. Castlegate	3.1671	10.7693	0.24226	7.60399	0.0947474	7.64738	0.0753793	11.0312	0.704092		1449.18	83.2946	1398.44	95.6007	1523.06	144.159	1468.89	156.895	8.18223	1523.06	144.159
061914-02_220	Price Canyon	L. Castlegate	2.84313	10.978	0.216493	6.46324	0.0951135	8.89859	0.0850245	11.6166	0.58563		1367	82.6459	1263.32	74.1517	1530.32	167.585	1649.37	184.835	17.4477	1530.32	167.585
061914-02_275	Price Canyon	L. Castlegate	3.74568	9.67295	0.283825	6.96549	0.0954821	6.75286	0.082228	8.9013	0.715994		1581.19	77.6725	1610.6	99.2771	1537.6	127.054	1597.21	137.164	-4.74725	1537.6	127.054
061914-02_281	Price Canyon	L. Castlegate	3.73411	17.1379	0.282511	12.3387	0.0956636	11.9158	0.0823993	13.9065	0.718728		1578.71	138.103	1604	175.254	1541.17	224.09	1600.41	215.118	-4.07639	1541.17	224.09
061914-02_330	Price Canyon	L. Castlegate	3.94316	8.56469	0.295647	5.89165	0.0965822	6.22798	0.0898512	8.8838	0.686459		1622.59	69.4797	1669.68	86.6697	1559.12	116.85	1739.08	148.581	-7.09132	1559.12	116.85
061914-02_378	Price Canyon	L. Castlegate	3.57718	10.4934	0.267273	7.49172	0.0969833	7.36773	0.0804431	14.0363	0.712048		1544.48	83.4571	1526.94	101.864	1566.89	138.095	1563.85	212.341	2.5496	1566.89	138.095
061914-02_312	Price Canyon	L. Castlegate	3.24707	8.8876	0.242011	6.26051	0.0972413	6.35436	0.0721555	9.62706	0.699176		1468.48	69.1014	1397.14	78.6427	1571.87	119.024	1408.21	131.38	11.116	1571.87	119.024
061914-02_334	Price Canyon	L. Castlegate	3.57488	17.3968	0.266099	11.0524	0.0972816	13.441	0.0894842	10.2362	0.634879		1543.97	138.893	1520.97	149.771	1572.65	251.739	1732.28	170.652	3.2861	1572.65	251.739
061914-02_01	Price Canyon	L. Castlegate	3.40736	8.9852	0.25364	6.54682	0.0973465	6.1868	0.0858145	9.68063	0.725193		1506.09	70.6476	1457.22	85.3924	1573.9	115.855	1664.08	155.235	7.41313	1573.9	115.855
061914-02_186	Price Canyon	L. Castlegate	4.00482	8.89314	0.297397	6.17136	0.097686	6.39894	0.0762544	9.63242	0.694455		1635.17	72.3793	1678.39	91.1993	1580.41	119.727	1485.33	138.416	-6.19936	1580.41	119.727
061914-02_230	Price Canyon	L. Castlegate	3.62142	8.93904	0.268561	6.24275	0.0977365	6.41525	0.0831499	8.8664	0.696389		1554.25	71.242	1533.49	85.2022	1581.38	120.017	1614.42	138.044	3.02815	1581.38	120.017
061914-02_362	Price Canyon	L. Castlegate	3.34805	8.92844	0.247624	6.32172	0.097964	6.35043	0.070407	9.52573	0.702949		1492.34	69.9179	1426.21	80.8881	1585.73	118.737	1375.22	127.041	10.0595	1585.73	118.737
061914-02_241	Price Canyon	L. Castlegate	3.92855	9.96518	0.290647	7.13285	0.0979817	6.97938	0.0867354	9.31235	0.713776		1619.58	80.8247	1644.76	103.556	1586.06	130.491	1681.22	150.787	-3.70075	1586.06	130.491
061914-02_303	Price Canyon	L. Castlegate	3.3414	11.779	0.246793	8.76949	0.0981172	7.89092	0.0696039	10.5117	0.742441		1490.78	92.3061	1421.92	111.912	1588.65	147.485	1360.05	138.735	10.495	1588.65	147.485
061914-02_370	Price Canyon	L. Castlegate	3.60718	8.02849	0.266218	5.76781	0.0981554	5.62509	0.0805198	9.66248	0.71353		1551.12	63.91	1521.57	78.1769	1589.37	105.126	1565.28	146.063	4.26573	1589.37	105.126
061914-02_325	Price Canyon	L. Castlegate	3.87398	8.19423	0.285717	5.57039	0.0982038	6.02663	0.0888982	9.18518	0.677558		1608.28	66.2257	1620.09	79.8026	1590.29	112.617	1721.4	152.139	-1.87366	1590.29	112.617
061914-02_39	Price Canyon	L. Castlegate	3.82697	8.01966	0.282006	5.717	0.0983273	5.65753	0.0794572	8.21933	0.708764		1598.43	64.6476	1601.46	81.0732	1592.64	105.688	1545.39	122.658	-0.553387	1592.64	105.688
061914-02_25	Price Canyon	L. Castlegate	3.82068	6.62422	0.280558	4.58958	0.0986667	4.81575	0.0844322	8.17476	0.686675		1597.11	53.3577	1594.17	64.8231	1599.07	89.8879	1638.33	129.057	0.306497	1599.07	89.8879
061914-02_374	Price Canyon	L. Castlegate	4.04924	10.8522	0.296496	7.73789	0.0989441	7.63093	0.0836132	10.1711	0.711024		1644.15	88.5919	1673.91	114.086	1604.31	142.338	1623.06	159.254	-4.33805	1604.31	142.338
061914-02_293	Price Canyon	L. Castlegate	3.85965	7.97121	0.281861	5.51742	0.0991987	5.7851	0.0836344	7.35915	0.687972		1605.29	64.3693	1600.73	78.2114	1609.1	107.842	1623.46	115.128	0.520459	1609.1	107.842
061914-02_65	Price Canyon	L. Castlegate	3.85963	6.88841	0.281715	4.95234	0.099269	4.82892	0.0817766	7.50005	0.713164		1605.28	55.6065	1600	70.1721	1610.42	90.0024	1588.78	114.922	0.647541	1610.42	90.0024
061914-02_15	Price Canyon	L. Castlegate	3.75663	6.799	0.274146	4.73519	0.0992925	4.91907	0.0795354	7.88837	0.690354		1583.53	54.5748	1561.81	65.6801	1610.86	91.6774	1546.86	117.812	3.04514	1610.86	91.6774
061914-02_321	Price Canyon	L. Castlegate	3.27859	16.7308	0.238904	13.4622	0.0994173	9.95011	0.065344	20.489	0.803935		1475.99	130.897	1381	167.386	1613.2	185.386	1279.39	255.619	14.3941	1613.2	185.386
061914-02_202	Price Canyon	L. Castlegate	3.76731	9.27713	0.273922	6.66716	0.0996253	6.48643	0.0835732	8.61217	0.714951		1585.81	74.573	1560.68	92.4215	1617.1	120.792	1622.32	134.704	3.4889	1617.1	120.792
061914-02_18	Price Canyon	L. Castlegate	3.76223	8.58723	0.273014	5.95183	0.0998499	6.22222	0.0824677	9.81538	0.689191		1584.72	68.9899	1556.08	82.2896	1621.29	115.81	1601.68	151.712	4.02177	1621.29	115.81
061914-02_134	Price Canyon	L. Castlegate	3.18929	9.83643	0.230836	7.0884	0.100097	6.8448	0.071065	9.41843	0.718179		1454.57	76.1789	1338.88	85.7027	1625.89	127.323	1387.64	126.705	17.6527	1625.89	127.323
061914-02_118	Price Canyon	L. Castlegate	3.87198	7.70691	0.279655	5.22543	0.100342	5.70042	0.0865124	8.60211	0.67301		1607.86	62.2704	1589.63	73.619	1630.44	105.974	1677.07	138.917	2.50297	1630.44	105.974
061914-02_297	Price Canyon	L. Castlegate	4.04565	7.70925	0.29172	5.46696	0.100479	5.46879	0.0798336	7.97232	0.704839		1643.42	62.8445	1650.12	79.5947	1632.96	101.635	1552.44	119.484	-1.05083	1632.96	101.635
061914-02_272	Price Canyon	L. Castlegate	4.02816	8.28088	0.289	5.51619	0.100835	6.22106	0.0813369	8.16433	0.660039		1639.9	67.4594	1636.53	79.7306	1639.53	115.519	1580.56	124.508	0.182953	1639.53	115.519
061914-02_227	Price Canyon	L. Castlegate	4.04003	8.49379	0.290164	6.10708	0.1009	5.92446	0.0877878	8.7469	0.716583		1642.29	69.2397	1642.35	88.5479	1640.73	109.995	1700.78	143.185	-0.0985607	1640.73	109.995
061914-02_167	Price Canyon	L. Castlegate	4.02482	13.0588	0.288774	9.71506	0.100924	8.7487	0.0836547	10.5789	0.742412		1639.22	106.598	1635.4	140.35	1641.17	162.421	1623.84	165.742	0.351593	1641.17	162.421
061914-02_48	Price Canyon	L. Castlegate	3.72997	8.90165	0.267717	6.37376	0.100939	6.24559	0.0765572	8.37346	0.712558		1577.82	71.3941	1529.2	86.7749	1641.45	115.947	1491.02	120.716	6.8381	1641.45	115.947
061914-02_187	Price Canyon	L. Castlegate	4.22018	11.4068	0.302773	8.06166	0.101113	8.0677	0.0797021	11.2836	0.706941		1677.95	93.9017	1705.04	120.793	1644.64	149.672	1549.98	169.061	-3.67252	1644.64	149.672
061914-02_175	Price Canyon	L. Castlegate	4.38156	9.67894	0.311179	6.8041	0.101985	6.89499	0.081564	9.84081	0.701804		1708.87	80.1825	1746.51	104.106	1660.55	127.658	1584.8	150.559	-5.17627	1660.55	127.658
061914-02_121	Price Canyon	L. Castlegate	3.70373	9.94858	0.263146	7.19927	0.101997	6.89482	0.0807261	10.1047	0.720899		1572.18	79.7037	1505.92	96.6901	1660.78	127.651	1569.14	153.136	9.32474	1660.78	127.651
061914-02_294	Price Canyon	L. Castlegate	4.04191	7.40012	0.286862	5.19438	0.102076	5.30524	0.0845285	7.59035	0.697179		1642.67	60.3074	1625.83	74.6471	1662.2	98.204	1640.13	119.93	2.18811	1662.2	98.204
061914-02_338	Price Canyon	L. Castlegate	4.63071	7.40179	0.327112	5.25002	0.102521	5.23706	0.104914	8.00786	0.706679		1754.82	61.8854	1824.37	83.4242	1670.25	96.8434	2016.52	154.274	-9.22688	1670.25	96.8434
061914-02_182	Price Canyon	L. Castlegate	4.57084	8.32437	0.32272	5.62472	0.102723	6.12862	0.0865798	9.70994	0.676737		1743.97	69.4598	1803	88.4717	1673.9	113.278	1678.32	156.99	-7.71227	1673.9	113.278
061914-02_366	Price Canyon	L. Castlegate	3.91078	13.8561	0.274771	9.9267	0.103108	9.69517	0.0805543	16.13	0.714437		1615.91	112.501	1564.98	137.952	1680.81	179.045	1565.92	244.52	6.89163	1680.81	179.045
061914-02_103	Price Canyon	L. Castlegate	3.94232	9.54354	0.275607	6.90695	0.103659	6.61566	0.090545	9.9464	0.720743		1622.41	77.4464	1569.2	96.2079	1690.64	122.024	1751.95	167.61	7.18271	1690.64	122.024
061914-02_137	Price Canyon	L. Castlegate	4.48993	15.8029	0.312387	11.4201	0.104134	10.9388	0.0931346	10.1965	0.721704		1729.11	131.97	1752.44	175.278	1699.07	201.55	1799.89	176.358	-3.14139	1699.07	201.55
061914-02_216	Price Canyon	L. Castlegate	4.36611	16.031	0.303595	11.6217	0.10414	11.0648	0.0905267	11.5554	0.723609		1705.95	133.201	1709.11	174.52	1699.18	203.868	1751.61	194.819	-0.584558	1699.18	203.868
061914-02_96	Price Canyon	L. Castlegate	3.70259	12.4741	0.256799	6.33385	0.104462	10.7654	0.0817624	9.43611	0.505182		1571.93	100.048	1473.45	83.4331	1704.87	198.211	1588.51	144.671	13.574	1704.87	198.211
061914-02_85	Price Canyon	L. Castlegate	4.4253	9.08196	0.306856	6.71759	0.104476	6.14261	0.0874697	9.59228	0.736584		1717.09	75.3572	1725.22	101.689	1705.12	113.094	1694.87	156.552	-1.17882	1705.12	113.094
061914-02_308	Price Canyon	L. Castlegate	3.87799	8.97799	0.268749	6.64373	0.10458	6.0802	0.0800332	9.15671	0.73578		1609.11	72.5962	1534.45	90.7258	1706.94	111.919	1556.18	137.615	10.1054	1706.94	111.919
061914-02_302	Price Canyon	L. Castlegate	4.41655	7.5505	0.304969	5.34656	0.104946	5.36995	0.082979	8.23399	0.703004		1715.45	62.5916	1715.9	80.551	1713.37	98.7664	1611.23	127.922	-0.147708	1713.37	98.7664
061914-02_213	Price Canyon	L. Castlegate	4.33999	14.6612	0.299361	10.76	0.104973	9.98506	0.097566	13.6156	0.732237		1700.99	121.567	1688.14	159.84	1713.84	183.639	1881.66	246.127	1.49959	1713.84	183.639
061914-02_237	Price Canyon	L. Castlegate	4.60998	8.78376	0.317814	6.32386	0.105158	6.11502	0.0929454	8.8057	0.717877		1751.08	73.4183	1779.05	98.3226	1717.08	112.418	1796.39	151.928	-3.60899	1717.08	112.418
061914-02_140	Price Canyon	L. Castlegate	4.37275	9.18821	0.2999	6.62235	0.10565	6.39744	0.0868216	8.95396	0.71779		1707.2	76.073	1690.81	98.4987	1725.66	117.485	1682.82	145.097	2.01933	1725.66	117.485
061914-02_130	Price Canyon	L. Castlegate	4.54195	8.97513	0.310442	6.31159	0.106003	6.40876	0.0892399	8.58455	0.700094		1738.69	74.823	1742.88	96.3945	1731.78	117.604	1727.74	142.659	-0.64135	1731.78	117.604
061914-02_390	Price Canyon	L. Castlegate	4.00249	8.67928	0.27205	6.30514	0.106613	5.99352	0.0868795	8.52364	0.723287		1634.7	70.6248	1551.2	86.9328	1742.3	109.842	1683.9	138.184	10.9684	1742.3	109.842
061914-02_240	Price Canyon	L. Castlegate	4.61722	17.6379	0.31237	13.0185	0.107157	11.9109	0.0891824	10.6943	0.737541		1752.39	148.254	1752.36	199.816	1751.63	218.038	1726.68	177.768	-0.0418053	1751.63	218.038
061914-02_341	Price Canyon	L. Castlegate	4.81132	8.27116	0.323739	5.8872	0.107662	5.82896	0.0962808	8.47139	0.709476		1786.88	69.6411	1807.96	92.8218	1760.21	106.591	1857.98	150.941	-2.7127	1760.21	106.591
061914-02_142	Price Canyon	L. Castlegate	4.90934	11.5179	0.329985	8.32836	0.10782	7.98055	0.0931173	10.7178	0.721053		1803.86	97.4581	1838.31	133.225	1762.89	145.888	1799.57	185.385	-4.27796	1762.89	145.888
061914-02_350	Price Canyon	L. Castlegate	4.8183	7.8703	0.322178	5.81398	0.108398	5.32565	0.102752	9.92134	0.736284		1788.1	66.2727	1800.36	91.3328	1772.67	97.2389	1976.93	187.72	-1.56183	1772.67	97.2389
061914-02_307	Price Canyon	L. Castlegate	4.8275	8.97537	0.321424	5.91229	0.10885	6.78894	0.0901219	9.44214	0.654129		1789.7	75.6353	1796.68	92.7128	1780.26	123.842	1744.1	158.395	-0.922285	1780.26	123.842
061914-02_376	Price Canyon	L. Castlegate	4.68931	8.14858	0.311251	5.82443	0.109162	5.72607	0.0916616	10.3427	0.711487		1765.33	68.2992	1746.86	89.1302	1785.47	104.387	1772.63	176.295	2.16228	1785.47	104.387
061914-02_58	Price Canyon	L. Castlegate	3.97545	8.68256	0.263808	6.29005	0.109175	6.0177	0.089775	9.12924	0.72087		1629.2	70.5553	1509.3	84.6456	1785.69	109.701	1737.67	152.583	15.4784	1785.69	109.701
061914-02_369	Price Canyon	L. Castlegate	4.54952	8.92808	0.301471	6.43976	0.109321	6.22232	0.0936586	9.91474	0.717143		1740.07	74.4518	1698.6	96.1682	1788.12	113.397	1809.57	172.35	5.00651	1788.12	113.397
061914-02_24	Price Canyon	L. Castlegate	4.92024	15.4385	0.325992	11.0082	0.109354	10.8418	0.0937382	14.5002	0.711922		1805.73	131.003	1818.92	174.505	1788.68	197.571	1811.04	252.758	-1.69079	1788.68	197.571
061914-02_149	Price Canyon	L. Castlegate	4.78224	7.93957	0.316346	5.68633	0.109591	5.58247	0.115168	34.449	0.71109		1781.79	66.771	1771.86	88.0988	1792.62	101.681	2203.23	732.189	1.1579	1792.62	101.681
061914-02_363	Price Canyon	L. Castlegate	4.67839	8.95089	0.308205	6.45735	0.109977	6.24482	0.0932611	9.38034	0.716431		1763.38	75.0164	1731.87	98.0778	1799.03	113.657	1802.22	162.387	3.73296	1799.03	113.657
061914-02_54	Price Canyon	L. Castlegate	5.07899	13.6538	0.334477	10.0853	0.110009	9.22503	0.0908672	9.43815	0.737233		1832.6	116.338	1860.04	162.988	1799.55	167.887	1757.92	159.532	-3.36154	1799.55	167.887
061914-02_214	Price Canyon	L. Castlegate	4.89366	16.2983	0.321522	11.4143	0.110209	11.6562	0.0948024	13.2664	0.698941		1801.16	138.259	1797.16	179.066	1802.85	212.048	1830.7	233.539	0.31589	1802.85	212.048
061914-02_298	Price Canyon	L. Castlegate	4.84046	11.4907	0.318093	8.2822	0.110255	7.98791	0.0905519	8.30052	0.718855		1791.96	96.9917	1780.41	128.863	1803.62	145.261	1752.07	139.789	1.28689	1803.62	145.261
061914-02_146	Price Canyon	L. Castlegate	4.78302	13.513	0.313049	9.32118	0.110751	9.80549	0.0912816	10.6046	0.688084		1781.92	113.959	1755.69	143.282	1811.78	178.147	1765.6	180.089	3.09568	1811.78	178.147
061914-02_292	Price Canyon	L. Castlegate	4.93663	8.12409	0.321043	5.63595	0.11139	5.8831	0.0903425	8.43419	0.68965		1808.54	68.7001	1794.82	88.2997	1822.21	106.757	1748.19	141.745	1.50307	1822.21	106.757
061914-02_198	Price Canyon	L. Castlegate	5.21732	9.08191	0.339225	6.43467	0.111483	6.43387	0.0914155	9.47057	0.705789		1855.45	77.5343	1882.94	105.079	1823.73	116.731	1768.07	160.971	-3.24676	1823.73	116.731
061914-02_267	Price Canyon	L. Castlegate	4.95036	9.93854	0.321008	7.34816	0.111553	6.73315	0.0794556	9.85606	0.735552		1810.89	84.147	1794.65	115.121	1824.87	122.145	1545.36	147.169	1.65607	1824.87	122.145
061914-02_311	Price Canyon	L. Castlegate	4.72465	16.4366	0.305843	11.8426	0.111962	11.4235	0.0925915	12.7747	0.719009		1771.62	138.595	1720.22	178.848	1831.5	207.074	1789.84	220.009	6.07599	1831.5	207.074
061914-02_398	Price Canyon	L. Castlegate	4.97029	9.39626	0.321123	6.92887	0.11211	6.39055	0.0919946	8.29477	0.733117		1814.28	79.5902	1795.21	108.58	1833.89	115.811	1778.8	141.737	2.10914	1833.89	115.811
061914-02_94	Price Canyon	L. Castlegate	4.77052	9.2171	0.308225	6.88161	0.112132	6.16475	0.0918085	10.0792	0.743415		1779.73	77.5207	1731.96	104.528	1834.26	111.714	1775.35	172.037	5.57679	1834.26	111.714
061914-02_33	Price Canyon	L. Castlegate	4.88279	10.7411	0.312167	7.57419	0.11333	7.63954	0.0906726	8.67694	0.702947		1799.29	90.7646	1751.36	116.171	1853.49	138.059	1754.31	146.33	5.51012	1853.49	138.059
061914-02_205	Price Canyon	L. Castlegate	5.01675	8.38709	0.320119	6.11332	0.113496	5.78547	0.0919937	8.09877	0.72401		1822.15	71.1232	1790.31	95.5709	1856.13	104.52	1778.78	138.375	3.546	1856.13	104.52
061914-02_357	Price Canyon	L. Castlegate	5.34675	9.56395	0.34042	6.91334	0.11384	6.63891	0.103977	10.2245	0.719827		1876.37	81.9876	1888.69	113.194	1861.59	119.862	1999.37	195.584	-1.45549	1861.59	119.862
061914-02_250	Price Canyon	L. Castlegate	5.17031	8.0988	0.328256	5.71821	0.114118	5.76687	0.095122	8.9163	0.702125		1847.74	69.0126	1829.92	91.1041	1866	104.064	1836.6	157.146	1.93337	1866	104.064
061914-02_385	Price Canyon	L. Castlegate	5.12481	9.26464	0.325127	6.62376	0.114249	6.49975	0.0964601	9.54455	0.71261		1840.23	78.8707	1814.72	104.775	1868.07	117.261	1861.28	170.433	2.856	1868.07	117.261
061914-02_38	Price Canyon	L. Castlegate	5.04142	10.8341	0.318545	8.03703	0.114672	7.29089	0.0942091	8.16207	0.739683		1826.31	92.0499	1782.62	125.183	1874.74	131.431	1819.74	142.54	4.91403	1874.74	131.431
061914-02_228	Price Canyon	L. Castlegate	5.56061	13.562	0.35065	9.84019	0.114928	9.34552	0.0970184	11.7876	0.724673		1910.02	117.235	1937.7	164.72	1878.75	168.391	1871.57	211.814	-3.13771	1878.75	168.391
061914-02_196	Price Canyon	L. Castlegate	5.41489	11.5509	0.341077	8.289	0.115099	8.06116	0.0966358	11.3614	0.716217		1887.21	99.3183	1891.85	135.92	1881.44	145.204	1864.52	203.379	-0.553323	1881.44	145.204
061914-02_296	Price Canyon	L. Castlegate	4.68253	6.73633	0.293505	4.71251	0.115586	4.85104	0.0837769	8.36048	0.693863		1764.12	56.4208	1659.02	68.9342	1889.03	87.3034	1626.12	131.05	12.1761	1889.03	87.3034
061914-02_173	Price Canyon	L. Castlegate	5.3647	8.6845	0.33587	6.03397	0.115671	6.26336	0.092494	9.27962	0.692718		1879.24	74.4595	1866.77	97.8052	1890.35	112.704	1788.04	159.423	1.24745	1890.35	112.704
061914-02_95	Price Canyon	L. Castlegate	4.8123	8.61665	0.300777	6.16416	0.115917	6.05447	0.0928275	9.10628	0.711548		1787.05	72.5624	1695.16	91.889	1894.18	108.896	1794.21	156.951	10.5068	1894.18	108.896
061914-02_301	Price Canyon	L. Castlegate	5.25125	6.91439	0.323291	4.72587	0.117704	5.08616	0.0915744	8.19314	0.677453		1860.98	59.043	1805.78	74.4316	1921.65	91.1905	1771.02	139.406	6.02981	1921.65	91.1905
061914-02_119	Price Canyon	L. Castlegate	5.39622	9.59009	0.326093	6.88626	0.119928	6.70468	0.102183	9.14726	0.715006		1884.25	82.3321	1819.42	109.172	1955.14	119.749	1966.5	172.139	6.94188	1955.14	119.749
061914-02_386	Price Canyon	L. Castlegate	5.06061	8.41762	0.303281	5.75622	0.120941	6.16544	0.107277	14.4839	0.680833		1829.53	71.4863	1707.56	86.3553	1970.16	109.93	2059.7	285.635	13.3289	1970.16	109.93
061914-02_02	Price Canyon	L. Castlegate	6.17416	6.70757	0.361314	4.83566	0.123829	4.69125	0.0968394	9.56245	0.714761		2000.8	58.6793	1988.4	82.7416	2012.11	83.2327	1868.27	171.369	1.17867	2012.11	83.2327
061914-02_191	Price Canyon	L. Castlegate	6.23645	13.0088	0.363261	9.14466	0.12452	9.25847	0.0969201	14.1322	0.702474		2009.58	114.316	1997.61	157.113	2021.98	164.074	1869.76	253.973	1.20486	2021.98	164.074
061914-02_165	Price Canyon	L. Castlegate	6.33398	8.38762	0.363188	5.9697	0.126296	5.92775	0.101491	8.1713	0.707501		2023.17	73.683	1997.27	102.538	2047.03	104.741	1953.81	152.754	2.43113	2047.03	104.741
061914-02_262	Price Canyon	L. Castlegate	6.79734	9.61691	0.38814	6.89337	0.126682	6.74643	0.112843	9.01674	0.712664		2085.38	85.3254	2114.19	124.268	2052.43	119.132	2161.05	185.651	-3.0095	2052.43	119.132
061914-02_249	Price Canyon	L. Castlegate	6.54965	7.38668	0.363159	5.23322	0.130678	5.24723	0.106333	8.61052	0.70385		2052.6	65.1577	1997.13	89.8805	2107.09	92.0742	2042.47	167.969	5.21849	2107.09	92.0742
061914-02_124	Price Canyon	L. Castlegate	6.59087	10.3611	0.355323	7.16527	0.134412	7.50961	0.115974	9.34395	0.688978		2058.13	91.5933	1959.97	121.111	2156.39	131.034	2217.85	197.228	9.10897	2156.39	131.034
061914-02_11	Price Canyon	L. Castlegate	6.19249	11.4783	0.331232	8.42587	0.13547	7.81866	0.120323	12.4256	0.732129		2003.39	100.673	1844.35	135.168	2170.07	136.216	2296.45	271.551	15.0096	2170.07	136.216
061914-02_324	Price Canyon	L. Castlegate	7.7187	10.6554	0.40529	7.33552	0.137946	7.74317	0.12468	9.56417	0.68697		2198.78	96.0698	2193.35	136.4	2201.58	134.425	2374.92	215.449	0.373594	2201.58	134.425
061914-02_192	Price Canyon	L. Castlegate	7.79113	15.2003	0.395392	9.70442	0.14291	11.7055	0.11418	21.7372	0.637945		2207.18	137.622	2147.79	177.308	2262.77	201.983	2185.31	455.338	5.08158	2262.77	201.983
061914-02_261	Price Canyon	L. Castlegate	8.52271	8.70334	0.418101	6.23947	0.147456	6.1125	0.12418	8.70563	0.711882		2288.35	79.2526	2251.85	118.601	2316.63	104.863	2365.92	195.311	2.79628	2316.63	104.863
061914-02_111	Price Canyon	L. Castlegate	8.57575	7.72866	0.406264	5.35316	0.15298	5.60995	0.123538	8.9338	0.687856		2293.99	70.3929	2197.82	99.7021	2379.51	95.6112	2354.38	199.529	7.63559	2379.51	95.6112
061914-02_355	Price Canyon	L. Castlegate	9.81328	13.7513	0.449815	10.5756	0.158133	8.8088	0.144124	10.9127	0.767892		2417.4	127.38	2394.43	211.592	2435.8	149.25	2721.36	279.776	1.6983	2435.8	149.25
061914-02_287	Price Canyon	L. Castlegate	10.2466	17.1751	0.457915	12.9628	0.162002	11.2886	0.12934	8.07531	0.753658		2457.3	160.203	2430.35	262.608	2476.66	190.466	2458.48	187.8	1.86996	2476.66	190.466
061914-02_194	Price Canyon	L. Castlegate	10.2015	10.1153	0.449889	7.76991	0.164429	6.49273	0.124041	10.2891	0.766812		2453.22	93.8056	2394.76	155.449	2501.72	109.27	2363.43	230.809	4.27548	2501.72	109.27
061914-02_288	Price Canyon	L. Castlegate	10.7137	7.23681	0.456102	5.23055	0.170068	5.04851	0.132933	7.20389	0.7165		2498.62	67.3067	2422.32	105.627	2558.31	84.4855	2522.69	171.574	5.31541	2558.31	84.4855
061914-02_243	Price Canyon	L. Castlegate	11.142	8.50568	0.469145	6.22106	0.172148	5.8265	0.129922	8.94742	0.728536		2535.08	79.4138	2479.81	128.08	2578.64	97.3102	2468.9	209.021	3.83239	2578.64	97.3102
061914-02_63	Price Canyon	L. Castlegate	11.9692	8.30813	0.500317	6.14582	0.173336	5.62568	0.133218	8.72092	0.735874		2602	78.0079	2615.16	132.136	2590.12	93.8507	2527.77	208.287	-0.966785	2590.12	93.8507
061914-02_329	Price Canyon	L. Castlegate	12.5086	9.76867	0.519327	6.95037	0.174424	6.87523	0.156534	9.86404	0.710394		2643.38	92.0985	2696.32	153.178	2600.56	114.58	2939.42	271.666	-3.68259	2600.56	114.58
061914-02_46	Price Canyon	L. Castlegate	12.159	7.78321	0.504175	5.62812	0.174727	5.41266	0.132001	7.7771	0.718611		2616.75	73.15	2631.72	121.623	2603.45	90.1798	2506.05	184.136	-1.08571	2603.45	90.1798
061914-02_373	Price Canyon	L. Castlegate	11.2118	8.47057	0.457917	6.02679	0.177379	5.98229	0.135555	9.91608	0.707977		2540.9	79.1254	2430.35	122.042	2628.52	99.4294	2569.41	240.682	7.53903	2628.52	99.4294
061914-02_70	Price Canyon	L. Castlegate	11.8245	6.40936	0.482754	4.55124	0.177479	4.5558	0.136232	9.00264	0.703421		2590.6	60.0749	2539.25	95.5293	2629.45	75.7134	2581.46	219.356	3.43047	2629.45	75.7134
061914-02_91	Price Canyon	L. Castlegate	12.1384	8.16916	0.492486	5.85993	0.178559	5.7268	0.137112	8.77675	0.713148		2615.16	76.7809	2581.42	124.666	2639.54	95.0825	2597.11	215.045	2.20163	2639.54	95.0825
061914-02_353	Price Canyon	L. Castlegate	12.4859	8.27417	0.503371	6.13921	0.179798	5.5731	0.154711	8.67726	0.739144		2641.67	77.9374	2628.27	132.53	2651.01	92.4293	2907.52	236.364	0.857957	2651.01	92.4293
061914-02_295	Price Canyon	L. Castlegate	12.1461	12.2578	0.485251	9.20195	0.181341	8.12034	0.129359	8.15889	0.749095		2615.76	115.491	2550.1	193.863	2665.17	134.494	2458.83	189.779	4.31776	2665.17	134.494
061914-02_42	Price Canyon	L. Castlegate	12.7319	6.86267	0.505082	4.97836	0.182641	4.76477	0.133747	7.35298	0.719706		2660.02	64.6953	2635.6	107.708	2677	78.8289	2537.19	176.09	1.54638	2677	78.8289
061914-02_27	Price Canyon	L. Castlegate	12.3342	10.0432	0.486425	7.43602	0.183715	6.7778	0.135762	7.98219	0.737945		2630.18	94.6018	2555.19	156.898	2686.69	112.031	2573.09	193.779	4.89461	2686.69	112.031
061914-02_190	Price Canyon	L. Castlegate	12.5846	10.1671	0.496391	7.34823	0.183903	7.02939	0.121871	9.64272	0.722483		2649.07	95.9194	2598.27	157.169	2688.39	116.171	2324.37	212.842	3.35228	2688.39	116.171
061914-02_131	Price Canyon	L. Castlegate	12.909	16.0956	0.50802	11.623	0.1841	11.15	0.136783	13.9856	0.721194		2673.03	152.826	2648.17	252.542	2690.15	184.239	2591.25	343.028	1.56054	2690.15	184.239
061914-02_52	Price Canyon	L. Castlegate	12.287	8.7743	0.483209	6.52599	0.184215	5.8983	0.12846	9.04291	0.740356		2626.58	82.569	2541.23	137.076	2691.19	97.4523	2442.72	209.145	5.57224	2691.19	97.4523
061914-02_284	Price Canyon	L. Castlegate	13.1383	8.70325	0.514968	6.23397	0.184679	6.11467	0.141044	8.00773	0.711627		2689.64	82.3006	2677.8	136.623	2695.35	100.988	2666.87	201.063	0.650814	2695.35	100.988
061914-02_144	Price Canyon	L. Castlegate	13.329	9.2513	0.521677	6.73629	0.185187	6.37325	0.151046	9.00166	0.724861		2703.24	87.5971	2706.29	148.9	2699.88	105.214	2843.28	240.177	-0.237423	2699.88	105.214
061914-02_100	Price Canyon	L. Castlegate	11.6399	10.0831	0.454266	7.14902	0.185661	7.13904	0.137517	9.53259	0.706197		2575.88	94.5545	2414.19	143.98	2704.1	117.81	2604.3	234.281	10.7212	2704.1	117.81
061914-02_68	Price Canyon	L. Castlegate	13.781	8.57654	0.536447	6.21791	0.186141	5.94024	0.145266	8.6986	0.721317		2734.77	81.3667	2768.56	139.972	2708.36	97.9881	2741.52	224.248	-2.22273	2708.36	97.9881
061914-02_206	Price Canyon	L. Castlegate	13.2659	10.0304	0.515457	7.15244	0.186375	7.06842	0.142066	8.9529	0.709513		2698.76	94.9836	2679.88	156.858	2710.43	116.576	2684.97	226.364	1.12722	2710.43	116.576
061914-02_377	Price Canyon	L. Castlegate	10.6044	13.028	0.409828	9.91152	0.187489	8.4732	0.123625	10.323	0.759606		2489.1	121.461	2214.14	185.787	2720.26	139.617	2355.93	230.878	18.6057	2720.26	139.617
061914-02_300	Price Canyon	L. Castlegate	13.3829	7.82744	0.516437	5.646	0.187771	5.45585	0.135266	8.17404	0.717068		2707.05	74.0838	2684.05	123.967	2722.73	89.878	2564.26	197.818	1.42074	2722.73	89.878
061914-02_83	Price Canyon	L. Castlegate	13.3692	8.42579	0.514466	5.99923	0.188265	5.94757	0.141714	9.44481	0.708344		2706.08	79.7637	2675.67	131.393	2727.06	97.9394	2678.73	238.353	1.88464	2727.06	97.9394
061914-02_36	Price Canyon	L. Castlegate	14.1546	9.09048	0.544587	6.64512	0.188323	6.2327	0.143493	7.51275	0.727958		2760.12	86.4205	2802.62	151.062	2727.57	102.63	2710.22	191.455	-2.75161	2727.57	102.63
061914-02_222	Price Canyon	L. Castlegate	13.822	18.1336	0.530157	13.1737	0.188865	12.4758	0.142148	12.6422	0.725714		2737.59	173.368	2742.11	294.439	2732.31	205.342	2686.42	320.548	-0.359014	2732.31	205.342
061914-02_97	Price Canyon	L. Castlegate	12.5025	11.4127	0.478012	8.57879	0.189502	7.55396	0.133784	12.1561	0.749605		2642.91	107.703	2518.6	178.903	2737.84	124.269	2537.86	292.023	8.00777	2737.84	124.269
061914-02_210	Price Canyon	L. Castlegate	13.0972	8.85695	0.49951	6.71398	0.189854	5.82255	0.145817	8.31268	0.753556		2686.68	83.7419	2611.69	144.2	2740.89	95.7589	2751.25	214.959	4.71393	2740.89	95.7589
061914-02_348	Price Canyon	L. Castlegate	14.4547	7.84861	0.547188	5.63317	0.191451	5.48456	0.175819	8.02942	0.715328		2780.03	74.6712	2813.47	128.446	2754.67	90.0866	3273.67	244.143	-2.13439	2754.67	90.0866
061914-02_154	Price Canyon	L. Castlegate	13.2553	8.44008	0.50158	6.10407	0.191575	5.8717	0.142597	8.33374	0.718356		2698	79.8516	2620.58	131.459	2755.73	96.4363	2694.37	211.32	4.90434	2755.73	96.4363
061914-02_317	Price Canyon	L. Castlegate	13.1086	8.53908	0.491142	5.8482	0.193411	6.26337	0.154319	11.5895	0.679715		2687.5	80.7285	2575.61	124.189	2771.38	102.723	2900.68	315.616	7.06402	2771.38	102.723
061914-02_309	Price Canyon	L. Castlegate	13.031	7.25694	0.487891	5.02277	0.193576	5.28727	0.0811724	12.6893	0.684997		2681.9	68.538	2561.55	106.182	2772.78	86.7034	1577.48	193.483	7.61824	2772.78	86.7034
061914-02_03	Price Canyon	L. Castlegate	14.1929	7.36733	0.53037	5.42916	0.19392	5.01949	0.146774	8.68093	0.732004		2762.69	69.9935	2743.01	121.307	2775.7	82.2906	2768.11	225.826	1.17755	2775.7	82.2906
061914-02_397	Price Canyon	L. Castlegate	13.1049	7.86153	0.485904	5.76771	0.195352	5.39445	0.139377	7.70544	0.727455		2687.23	74.2976	2552.93	121.6	2787.75	88.3419	2637.33	191.422	8.42322	2787.75	88.3419
061914-02_306	Price Canyon	L. Castlegate	12.9508	8.41812	0.477173	6.28721	0.196698	5.63978	0.130691	8.86624	0.742413		2676.08	79.5113	2514.94	130.942	2798.99	92.2667	2482.65	208.205	10.1483	2798.99	92.2667
061914-02_93	Price Canyon	L. Castlegate	14.4528	19.2279	0.530892	14.0261	0.197228	13.1675	0.150448	10.2182	0.728719		2779.9	184.61	2745.21	313.806	2803.39	215.336	2832.76	271.911	2.07546	2803.39	215.336
061914-02_252	Price Canyon	L. Castlegate	13.9584	8.88696	0.512509	6.25657	0.19728	6.3419	0.155906	8.9464	0.700543		2746.89	84.398	2667.33	136.686	2803.82	103.709	2928.45	245.379	4.86797	2803.82	103.709
061914-02_265	Price Canyon	L. Castlegate	14.0825	8.99371	0.514951	6.65449	0.197821	6.09576	0.13926	9.27215	0.73528		2755.28	85.4671	2677.73	145.839	2808.3	99.6437	2635.25	230.394	4.64953	2808.3	99.6437
061914-02_351	Price Canyon	L. Castlegate	14.3884	7.88337	0.514555	5.76495	0.202688	5.40021	0.16635	8.52912	0.728536		2775.67	74.9806	2676.05	126.275	2847.97	87.9661	3110.25	247.382	6.03666	2847.97	87.9661
061914-02_117	Price Canyon	L. Castlegate	15.6041	9.96088	0.52197	6.91487	0.216655	7.1977	0.168019	10.226	0.691276		2852.87	95.3288	2707.53	152.906	2955.99	116.102	3139.14	299.532	8.40543	2955.99	116.102
061914-02_170	Price Canyon	L. Castlegate	17.8316	8.93129	0.594123	6.46925	0.217322	6.18399	0.148663	9.09378	0.721523		2980.69	86.0767	3006.12	155.457	2960.95	99.7098	2801.38	239.296	-1.52533	2960.95	99.7098
061914-02_371	Price Canyon	L. Castlegate	16.9108	8.90049	0.562525	6.79799	0.217778	5.78014	0.141233	10.8512	0.760439		2929.79	85.53	2877.05	157.798	2964.33	93.1722	2670.23	273.268	2.94436	2964.33	93.1722
061914-02_278	Price Canyon	L. Castlegate	28.8263	6.82574	0.688604	4.81892	0.302907	4.89029	0.133624	7.33461	0.69769		3447.62	67.0811	3377.29	126.697	3485.16	75.6659	2535.01	175.505	3.09499	3485.16	75.6659
061914-02_195	Price Canyon	L. Castlegate	30.3608	13.077	0.696946	9.33496	0.315858	9.17075	0.179372	12.9456	0.712877		3498.56	129.241	3409.06	247.272	3549.78	141.216	3334.66	401.93	3.96433	3549.78	141.216
061914-02_61	Price Canyon	L. Castlegate	38.7072	16.8174	0.80974	12.3278	0.346342	11.4561	0.1983	8.48547	0.732091		3738.17	167.976	3823.9	355.939	3690.98	174.755	3656.47	285.834	-3.60121	3690.98	174.755
150413-02_87	Price Canyon	L. Castlegate	0.180284	7.58413	0.0263276	1.95255	0.0496644	7.32847			0.257452		168.305	11.7628	167.523	3.22883	179.293	170.857			0.464703	167.523	3.22883
150413-02_41	Price Canyon	L. Castlegate	0.453672	5.17119	0.0600104	2.28927	0.0548295	4.63686			0.442696		379.847	16.3872	375.689	8.3547	405.254	103.831			1.09478	375.689	8.3547
150413-02_121	Price Canyon	L. Castlegate	0.459771	11.2172	0.0602107	5.50181	0.0553817	9.77528			0.490479		384.099	35.8771	376.907	20.1421	427.644	218.065			1.87237	376.907	20.1421
150413-02_32	Price Canyon	L. Castlegate	0.466732	17.1517	0.0640086	2.6168	0.0528845	16.9509			0.152568		388.929	55.4321	399.958	10.148	323.861	385.525			-2.83559	399.958	10.148
150413-02_120	Price Canyon	L. Castlegate	0.485234	18.5332	0.0640162	2.33257	0.0549743	18.3859			0.125859		401.657	61.4993	400.004	9.04679	411.156	411.893			0.411541	400.004	9.04679
150413-02_54	Price Canyon	L. Castlegate	0.477217	6.37396	0.0643236	4.01045	0.0538077	4.95415			0.629193		396.161	20.9086	401.866	15.6246	362.987	111.716			-1.43993	401.866	15.6246
150413-02_46	Price Canyon	L. Castlegate	0.513211	10.7042	0.0667071	6.94578	0.0557985	8.14473			0.648882		420.606	36.8663	416.286	28.0006	444.339	181.109			1.02698	416.286	28.0006
150413-02_3	Price Canyon	L. Castlegate	0.527698	6.20024	0.0680366	2.19673	0.0562524	5.79805			0.354297		430.281	21.7472	424.316	9.02093	462.324	128.577			1.38623	424.316	9.02093
150413-02_101	Price Canyon	L. Castlegate	0.55692	16.8945	0.0684349	6.77091	0.059022	15.4784			0.400775		449.52	61.3812	426.72	27.9574	567.929	337.391			5.07213	426.72	27.9574
150413-02_99	Price Canyon	L. Castlegate	0.522968	14.413	0.0696834	6.53554	0.0544308	12.846			0.453449		427.132	50.2639	434.248	27.4457	388.896	288.64			-1.6659	434.248	27.4457
150413-02_105	Price Canyon	L. Castlegate	0.540765	4.74147	0.0708952	3.01204	0.0553211	3.66185			0.635254		438.929	16.8976	441.547	12.8543	425.202	81.7078			-0.596388	441.547	12.8543
150413-02_63	Price Canyon	L. Castlegate	0.574896	17.3007	0.070942	4.61984	0.0587739	16.6725			0.267032		461.176	64.1468	441.828	19.728	558.71	364.06			4.19529	441.828	19.728
150413-02_60	Price Canyon	L. Castlegate	0.533706	13.0653	0.0713308	3.78224	0.0542655	12.5058			0.289488		434.266	46.1725	444.168	16.2338	382.063	281.3			-2.28019	444.168	16.2338
150413-02_100	Price Canyon	L. Castlegate	0.555657	24.0089	0.0714231	4.87739	0.0564244	23.5082			0.203149		448.696	87.1286	444.724	20.9596	469.128	522.036			0.885221	444.724	20.9596
150413-02_58	Price Canyon	L. Castlegate	0.548237	4.04948	0.0719768	2.93556	0.0552427	2.7894			0.724923		443.841	14.5602	448.055	12.7062	422.035	62.2626			-0.949257	448.055	12.7062
150413-02_72	Price Canyon	L. Castlegate	0.570495	6.9787	0.0752745	3.59154	0.0549671	5.98357			0.514642		458.335	25.7421	467.855	16.2079	410.865	133.796			-2.07708	467.855	16.2079
150413-02_26	Price Canyon	L. Castlegate	0.591109	22.8588	0.0841765	6.26968	0.0509302	21.9822			0.274279		471.576	86.2805	521.004	31.3802	237.676	508.321			-10.4815	521.004	31.3802
150413-02_14	Price Canyon	L. Castlegate	0.736241	7.6911	0.0893668	3.90079	0.0597506	6.62849			0.507182		560.209	33.1182	551.791	20.6288	594.57	143.692			1.50267	551.791	20.6288
150413-02_73	Price Canyon	L. Castlegate	0.755595	7.32154	0.0932725	3.44991	0.0587535	6.4578			0.4712		571.466	31.9988	574.862	18.9737	557.956	140.801			-0.594393	574.862	18.9737
150413-02_40	Price Canyon	L. Castlegate	0.760515	21.1528	0.0967486	7.20691	0.0570114	19.8872			0.340708		574.307	92.847	595.326	40.9833	491.997	439.467			-3.65986	595.326	40.9833
150413-02_48	Price Canyon	L. Castlegate	0.770844	13.1902	0.0967918	2.48074	0.0577599	12.9548			0.188075		580.247	58.3158	595.58	14.1128	520.645	284.553			-2.64256	595.58	14.1128
150413-02_39	Price Canyon	L. Castlegate	0.809455	4.11665	0.0988275	2.53682	0.0594037	3.24212			0.616235		602.148	18.6995	607.534	14.7081	581.939	70.4129			-4.3982	607.534	14.7081
150413-02_117	Price Canyon	L. Castlegate	0.852112	4.85477	0.101046	2.01113	0.0611613	4.41861			0.41426		625.807	22.6801	620.535	11.898	644.931	94.9483			3.78268	620.535	11.898
150413-02_24	Price Canyon	L. Castlegate	0.88132	3.74501	0.103626	1.94621	0.061683	3.19959			0.519682		641.695	17.8141	635.621	11.7802	663.114	68.586			4.14609	635.621	11.7802
150413-02_47	Price Canyon	L. Castlegate	1.02186	6.01343	0.116956	2.15994	0.0633676	5.61213			0.359185		714.847	30.8621	713.019	14.5796	720.572	119.119			1.04815	713.019	14.5796
150413-02_90	Price Canyon	L. Castlegate	1.53699	1.30675	0.155734	0.705639	0.0715789	1.09984			0.539998		945.298	8.0385	933.026	6.12952	973.974	22.4124			4.20422	933.026	6.12952
150413-02_36	Price Canyon	L. Castlegate	1.5628	7.06814	0.157226	3.90343	0.0720903	5.89253			0.552257		955.576	43.7715	941.343	34.1879	988.486	119.924			4.76927	941.343	34.1879
150413-02_6	Price Canyon	L. Castlegate	1.65467	6.69761	0.166107	5.6299	0.0722475	3.62797			0.840584		991.341	42.3949	990.628	51.6978	992.935	73.7628			0.232323	990.628	51.6978
150413-02_108	Price Canyon	L. Castlegate	1.75176	5.98133	0.166892	4.47335	0.0761268	3.97058			0.747885		1027.81	38.6673	994.964	41.2437	1098.43	79.4579			9.41917	994.964	41.2437
150413-02_102	Price Canyon	L. Castlegate	1.85539	12.0422	0.170853	6.66152	0.078761	10.0319			0.553181		1065.35	79.4927	1016.81	62.6635	1166.12	198.863			12.804	1016.81	62.6635
150413-02_106	Price Canyon	L. Castlegate	1.75012	4.86899	0.172929	2.05883	0.0734002	4.41229			0.422845		1027.21	31.4644	1028.23	19.5675	1025	89.3145			-0.314767	1028.23	19.5675
150413-02_70	Price Canyon	L. Castlegate	1.79249	7.17475	0.173716	3.89434	0.0748369	6.02587			0.542785		1042.73	46.7712	1032.55	37.1561	1064.14	121.25			2.96884	1032.55	37.1561
150413-02_33	Price Canyon	L. Castlegate	1.82857	7.57045	0.175805	3.10153	0.0754358	6.90596			0.409689		1055.77	49.703	1044.02	29.8945	1080.12	138.604			3.34208	1044.02	29.8945
150413-02_20	Price Canyon	L. Castlegate	1.81485	3.31424	0.176782	2.54595	0.0744564	2.12188			0.768183		1050.83	21.6978	1049.37	24.6553	1053.88	42.7798			0.428136	1049.37	24.6553
150413-02_45	Price Canyon	L. Castlegate	1.82491	3.22397	0.176911	2.82812	0.0748146	1.5478			0.877218		1054.45	21.1482	1050.07	27.4049	1063.54	31.1161			1.26638	1050.07	27.4049
150413-02_64	Price Canyon	L. Castlegate	1.84313	5.31735	0.179251	2.64831	0.0745749	4.61093			0.49805		1060.98	35.0048	1062.88	25.9503	1057.09	92.8846			-0.547944	1062.88	25.9503
150413-02_79	Price Canyon	L. Castlegate	1.81805	6.10478	0.18024	3.24133	0.0731567	5.17322			0.530949		1051.98	39.9957	1068.28	31.9097	1018.28	104.821			-4.91101	1068.28	31.9097
150413-02_94	Price Canyon	L. Castlegate	1.8451	8.75201	0.180534	3.91006	0.0741242	7.83001			0.446761		1061.68	57.647	1069.89	38.5464	1044.83	158.013			-2.39843	1069.89	38.5464
150413-02_53	Price Canyon	L. Castlegate	1.88323	5.77638	0.180837	3.46542	0.075529	4.6214			0.59993		1075.2	38.3143	1071.55	34.2116	1082.61	92.7045			1.02172	1071.55	34.2116
150413-02_16	Price Canyon	L. Castlegate	1.94325	4.86194	0.183294	1.59353	0.0768916	4.59338			0.327757		1096.12	32.597	1084.94	15.9124	1118.4	91.6143			2.99129	1084.94	15.9124
150413-02_30	Price Canyon	L. Castlegate	1.89382	9.89684	0.183606	2.37116	0.0748086	9.60859			0.239587		1078.92	65.7879	1086.64	23.7115	1063.38	193.356			-2.1873	1086.64	23.7115
150413-02_66	Price Canyon	L. Castlegate	1.90971	3.97691	0.183725	3.84883	0.0753873	1.00119			0.967792		1084.48	26.5044	1087.29	38.5092	1078.83	20.0806			-0.784642	1087.29	38.5092
150413-02_9	Price Canyon	L. Castlegate	2.08019	16.8092	0.184151	4.12947	0.0819272	16.2941			0.245666		1142.3	115.391	1089.61	41.398	1243.79	319.695			12.396	1089.61	41.398
150413-02_27	Price Canyon	L. Castlegate	1.95149	6.64282	0.185349	3.23687	0.0763615	5.80083			0.487274		1098.96	44.6043	1096.13	32.6278	1104.57	115.952			0.763793	1096.13	32.6278
150413-02_11	Price Canyon	L. Castlegate	1.93717	9.44079	0.186349	4.50985	0.0753944	8.29396			0.477698		1094.02	63.2437	1101.57	45.6664	1079.03	166.478			-2.08901	1101.57	45.6664
150413-02_1	Price Canyon	L. Castlegate	1.99592	5.72235	0.189949	4.30329	0.0762089	3.77187			0.752014		1114.13	38.7141	1121.1	44.2821	1100.58	75.458			-1.86437	1121.1	44.2821
150413-02_77	Price Canyon	L. Castlegate	2.05005	9.51235	0.190693	4.81948	0.0779701	8.20107			0.506654		1132.31	64.9417	1125.13	49.7571	1146.13	162.978			1.83219	1125.13	49.7571
150413-02_28	Price Canyon	L. Castlegate	2.02514	5.87195	0.190694	4.88192	0.0770224	3.26292			0.831397		1123.99	39.9188	1125.13	50.4019	1121.75	65.0422			-0.301436	1125.13	50.4019
150413-02_57	Price Canyon	L. Castlegate	2.07657	3.91834	0.194263	3.08393	0.0775275	2.41718			0.78705		1141.1	26.8558	1144.43	32.338	1134.77	48.1094			-0.850816	1144.43	32.338
150413-02_111	Price Canyon	L. Castlegate	2.12995	10.0719	0.195234	4.50839	0.0791249	9.00657			0.447619		1158.57	69.6218	1149.67	47.4728	1175.28	178.278			2.1792	1149.67	47.4728
150413-02_124	Price Canyon	L. Castlegate	2.21462	5.26433	0.199565	1.38515	0.0804846	5.07883			0.263121		1185.67	36.829	1172.98	14.8551	1208.91	100.046			2.97173	1172.98	14.8551
150413-02_113	Price Canyon	L. Castlegate	2.23429	2.81287	0.20057	1.10833	0.0807927	2.58531			0.394021		1191.87	19.7312	1178.38	11.9362	1216.42	50.8766			3.12733	1178.38	11.9362
150413-02_31	Price Canyon	L. Castlegate	2.36639	2.81974	0.212219	2.24809	0.0808725	1.70206			0.797269		1232.51	20.1268	1240.63	25.3709	1218.37	33.4942			-1.82739	1218.37	33.4942
150413-02_80	Price Canyon	L. Castlegate	2.44389	4.29361	0.218676	2.87707	0.0810549	3.18709			0.670082		1255.62	30.9399	1274.88	33.28	1222.76	62.6093			-4.26233	1222.76	62.6093
150413-02_59	Price Canyon	L. Castlegate	2.33805	3.48457	0.208735	2.61634	0.0812376	2.30151			0.750838		1223.93	24.7834	1222.08	29.1259	1227.18	45.2322			0.415812	1227.18	45.2322
150413-02_12	Price Canyon	L. Castlegate	2.49048	2.97762	0.21783	2.60172	0.082921	1.4482			0.873758		1269.27	21.5732	1270.4	29.9993	1267.37	28.275			-0.23869	1267.37	28.275
150413-02_116	Price Canyon	L. Castlegate	2.47544	3.50168	0.216022	2.71963	0.0831099	2.20576			0.776664		1264.88	25.3263	1260.82	31.1447	1271.82	43.0345			0.864626	1271.82	43.0345
150413-02_91	Price Canyon	L. Castlegate	2.78346	6.94667	0.23492	3.36	0.0859337	6.08002			0.483685		1351.11	51.9036	1360.23	41.2041	1336.67	117.577			-1.76264	1336.67	117.577
150413-02_55	Price Canyon	L. Castlegate	2.75297	3.16565	0.228458	2.90835	0.0873964	1.25012			0.918723		1342.89	23.5797	1326.41	34.8669	1369.23	24.0616			3.12722	1369.23	24.0616
150413-02_51	Price Canyon	L. Castlegate	2.90189	5.38706	0.240641	5.23318	0.0874601	1.27838			0.971435		1382.4	40.686	1390.03	65.435	1370.64	24.6008			-1.41467	1370.64	24.6008
150413-02_21	Price Canyon	L. Castlegate	2.89729	6.60559	0.23908	6.49035	0.0878914	1.22846			0.982555		1381.21	49.8721	1381.91	80.7303	1380.09	23.6068			-0.131897	1380.09	23.6068
150413-02_23	Price Canyon	L. Castlegate	2.9263	3.81628	0.239684	3.38766	0.0885477	1.7572			0.887686		1388.74	28.8825	1385.06	42.2229	1394.38	33.7021			0.668448	1394.38	33.7021
150413-02_93	Price Canyon	L. Castlegate	2.86991	2.88378	0.234406	1.88594	0.0887971	2.18161			0.653982		1374.05	21.7158	1357.55	23.0865	1399.77	41.8118			3.01612	1399.77	41.8118
150413-02_118	Price Canyon	L. Castlegate	3.09246	4.9581	0.245651	4.68131	0.091303	1.63345			0.944173		1430.82	38.0466	1416.01	59.5127	1452.91	31.0809			2.54007	1452.91	31.0809
150413-02_13	Price Canyon	L. Castlegate	3.2362	7.01008	0.254573	5.419	0.0921982	4.44698			0.77303		1465.88	54.3896	1462.02	70.8856	1471.45	84.4143			0.64128	1471.45	84.4143
150413-02_114	Price Canyon	L. Castlegate	3.35632	5.32714	0.263261	3.64233	0.0924648	3.8874			0.683731		1494.27	41.6801	1506.5	48.9319	1476.93	73.7358			-2.00213	1476.93	73.7358
150413-02_19	Price Canyon	L. Castlegate	3.29205	3.0042	0.257264	2.3233	0.092808	1.9046			0.77335		1479.17	23.3981	1475.83	30.6462	1483.96	36.0898			0.547501	1483.96	36.0898
150413-02_22	Price Canyon	L. Castlegate	3.47876	12.7341	0.269935	3.32251	0.0934681	12.293			0.260915		1522.41	100.512	1540.47	45.5266	1497.37	232.726			-2.87841	1497.37	232.726
150413-02_74	Price Canyon	L. Castlegate	3.28884	2.00649	0.254938	1.16028	0.0935635	1.637			0.578264		1478.41	15.6235	1463.89	15.1948	1499.3	30.9553			2.3617	1499.3	30.9553
150413-02_38	Price Canyon	L. Castlegate	3.48848	3.40715	0.269722	3.33332	0.0938033	0.705427			0.978332		1524.61	26.8895	1539.39	45.6463	1504.14	13.3307			-2.34359	1504.14	13.3307
150413-02_103	Price Canyon	L. Castlegate	3.48408	3.37209	0.268199	3.28859	0.094217	0.745735			0.97524		1523.62	26.6053	1531.66	44.8333	1512.45	14.0737			-1.26976	1512.45	14.0737
150413-02_76	Price Canyon	L. Castlegate	3.43634	7.10069	0.26101	6.15001	0.0954857	3.54926			0.866114		1512.75	55.8613	1495	82.0612	1537.65	66.7763			2.77371	1537.65	66.7763
150413-02_98	Price Canyon	L. Castlegate	3.61783	6.43061	0.268463	4.0248	0.0977378	5.01536			0.62588		1553.46	51.1663	1532.99	54.9125	1581.38	93.8249			3.05992	1581.38	93.8249
150413-02_104	Price Canyon	L. Castlegate	3.70881	3.0761	0.273742	2.71614	0.0982633	1.44396			0.88298		1573.27	24.6023	1559.77	37.6298	1591.41	26.9756			1.98799	1591.41	26.9756
150413-02_115	Price Canyon	L. Castlegate	3.89146	2.87056	0.282844	2.44392	0.0997846	1.50578			0.851374		1611.91	23.1894	1605.67	34.736	1620.06	28.023			0.887924	1620.06	28.023
150413-02_97	Price Canyon	L. Castlegate	3.7687	3.10434	0.273785	2.7329	0.0998345	1.47247			0.880349		1586.1	24.9122	1559.99	37.8667	1620.98	27.3997			3.76286	1620.98	27.3997
150413-02_65	Price Canyon	L. Castlegate	4.09172	4.76188	0.296856	3.24182	0.0999675	3.488			0.680786		1652.65	38.86	1675.7	47.8369	1623.46	64.8924			-3.21766	1623.46	64.8924
150413-02_61	Price Canyon	L. Castlegate	3.82523	4.12928	0.276151	1.59967	0.100464	3.80684			0.387397		1598.07	33.2416	1571.95	22.3148	1632.67	70.7382			3.71891	1632.67	70.7382
150413-02_49	Price Canyon	L. Castlegate	3.99494	3.74631	0.288329	2.89802	0.10049	2.37409			0.773567		1633.17	30.4261	1633.17	41.8102	1633.14	44.1108			-0.00174633	1633.14	44.1108
150413-02_78	Price Canyon	L. Castlegate	3.89705	3.02231	0.280841	2.67605	0.100641	1.40469			0.88543		1613.07	24.4226	1595.6	37.825	1635.94	26.0912			2.46599	1635.94	26.0912
150413-02_10	Price Canyon	L. Castlegate	4.15306	3.67839	0.298784	3.27427	0.100811	1.67622			0.890137		1664.81	30.1039	1685.28	48.5575	1639.08	31.1223			-2.81845	1639.08	31.1223
150413-02_81	Price Canyon	L. Castlegate	3.83824	2.40672	0.275515	1.93581	0.101038	1.43002			0.804334		1600.8	19.3871	1568.73	26.9551	1643.26	26.5367			4.5351	1643.26	26.5367
150413-02_119	Price Canyon	L. Castlegate	3.94356	1.88997	0.282097	1.1213	0.101388	1.52141			0.593289		1622.67	15.3088	1601.91	15.9044	1649.67	28.206			2.89518	1649.67	28.206
150413-02_29	Price Canyon	L. Castlegate	4.06918	3.76257	0.291063	1.40695	0.101395	3.48961			0.373933		1648.15	30.6702	1646.84	20.4473	1649.8	64.6997			0.179548	1649.8	64.6997
150413-02_123	Price Canyon	L. Castlegate	4.08279	4.31116	0.292018	4.12799	0.101402	1.2433			0.957513		1650.87	35.1659	1651.61	60.1452	1649.92	23.052			-0.102361	1649.92	23.052
150413-02_89	Price Canyon	L. Castlegate	4.26478	2.98147	0.302311	2.77467	0.102316	1.09103			0.93064		1686.59	24.5243	1702.76	41.5213	1666.53	20.1825			-2.17401	1666.53	20.1825
150413-02_2	Price Canyon	L. Castlegate	4.24663	3.28205	0.300612	3.174	0.102456	0.835222			0.967078		1683.08	26.9752	1694.34	47.2918	1669.06	15.4446			-1.51476	1669.06	15.4446
150413-02_44	Price Canyon	L. Castlegate	3.96376	4.67741	0.280499	3.56995	0.102488	3.02219			0.763232		1626.81	37.93	1593.87	50.4121	1669.65	55.8927			4.53856	1669.65	55.8927
150413-02_83	Price Canyon	L. Castlegate	4.39022	3.0251	0.30954	2.86208	0.102865	0.979678			0.946109		1710.5	25.0191	1738.44	43.6113	1676.43	18.1028			-3.69906	1676.43	18.1028
150413-02_71	Price Canyon	L. Castlegate	4.15321	3.48648	0.292229	2.53782	0.103076	2.3906			0.727905		1664.84	28.5332	1652.66	36.9968	1680.22	44.1509			1.64049	1680.22	44.1509
150413-02_112	Price Canyon	L. Castlegate	3.67474	3.03062	0.249869	2.96259	0.106663	0.638553			0.977551		1565.9	24.1909	1437.8	38.1802	1743.14	11.6971			17.5165	1743.14	11.6971
150413-02_95	Price Canyon	L. Castlegate	4.62626	2.97007	0.31373	2.63364	0.106948	1.37304			0.886727		1754.02	24.7986	1759.03	40.5439	1748.03	25.1405			-0.629722	1748.03	25.1405
150413-02_62	Price Canyon	L. Castlegate	4.79525	1.95196	0.318038	1.69159	0.109353	0.973998			0.866611		1784.07	16.4002	1780.14	26.3128	1788.64	17.7433			0.475443	1788.64	17.7433
150413-02_35	Price Canyon	L. Castlegate	4.98156	12.578	0.328597	12.5165	0.109951	1.24198			0.995113		1816.2	106.461	1831.58	199.576	1798.58	22.602			-1.83453	1798.58	22.602
150413-02_86	Price Canyon	L. Castlegate	4.96918	4.03844	0.319593	2.09944	0.112768	3.44983			0.519865		1814.09	34.1393	1787.74	32.7778	1844.48	62.4274			3.07622	1844.48	62.4274
150413-02_68	Price Canyon	L. Castlegate	4.67844	3.39217	0.298072	3.35115	0.113836	0.525935			0.987908		1763.39	28.3797	1681.74	49.6063	1861.51	9.4981			9.65723	1861.51	9.4981
150413-02_88	Price Canyon	L. Castlegate	5.19266	4.82348	0.328422	2.72005	0.114672	3.98337			0.563919		1851.41	41.0735	1830.73	43.3504	1874.72	71.8223			2.34633	1874.72	71.8223
150413-02_15	Price Canyon	L. Castlegate	5.25839	2.63883	0.332255	2.58226	0.114783	0.543492			0.978561		1862.13	22.5138	1849.3	41.5148	1876.47	9.79741			1.44792	1876.47	9.79741
150413-02_37	Price Canyon	L. Castlegate	5.43319	3.39427	0.339995	2.27688	0.115899	2.51733			0.670799		1890.11	29.1095	1886.65	37.2416	1893.89	45.2827			0.382472	1893.89	45.2827
150413-02_82	Price Canyon	L. Castlegate	5.90634	6.93071	0.360844	5.54877	0.118713	4.15282			0.800606		1962.17	60.2012	1986.18	94.8493	1936.92	74.3253			-2.54282	1936.92	74.3253
150413-02_96	Price Canyon	L. Castlegate	4.89072	10.1072	0.297417	10.0737	0.119263	0.822764			0.996681		1800.66	85.2553	1678.49	148.872	1945.19	14.7111			13.7111	1945.19	14.7111
150413-02_122	Price Canyon	L. Castlegate	5.91508	8.2244	0.351638	7.97484	0.122001	2.01063			0.969657		1963.45	71.4622	1942.41	133.749	1985.68	35.7769			2.17903	1985.68	35.7769
150413-02_110	Price Canyon	L. Castlegate	5.7917	2.5262	0.344109	2.50063	0.12207	0.358528			0.989878		1945.17	21.8747	1906.41	41.2697	1986.68	6.37942			4.04062	1986.68	6.37942
150413-02_125	Price Canyon	L. Castlegate	6.87631	2.18168	0.38876	2.14601	0.128284	0.392923			0.983648		2095.61	19.3405	2117.07	38.7262	2074.57	6.91688			-2.04858	2074.57	6.91688
150413-02_109	Price Canyon	L. Castlegate	10.4827	3.38526	0.461787	2.65755	0.164638	2.097			0.785036		2478.39	31.3824	2447.44	54.1203	2503.85	35.2852			2.25281	2503.85	35.2852
150413-02_126	Price Canyon	L. Castlegate	11.1474	3.64975	0.47575	3.5456	0.169939	0.865679			0.971464		2535.53	34.0114	2508.73	73.685	2557.02	14.4863			1.88871	2557.02	14.4863
150413-02_56	Price Canyon	L. Castlegate	11.3852	3.00654	0.484103	2.78751	0.17057	1.12653			0.927149		2555.22	28.0648	2545.11	58.6153	2563.23	18.8479			0.706774	2563.23	18.8479
150413-02_42	Price Canyon	L. Castlegate	11.4007	3.27688	0.481035	3.07899	0.171892	1.12151			0.939609		2556.49	30.5921	2531.77	64.4675	2576.13	18.7401			1.72202	2576.13	18.7401
150413-02_75	Price Canyon	L. Castlegate	13.0806	3.28395	0.519703	3.22683	0.182546	0.609834			0.982606		2685.48	30.9789	2697.92	71.1368	2676.12	10.0928			-0.814446	2676.12	10.0928
150413-02_7	Price Canyon	L. Castlegate	12.9261	3.8503	0.511637	3.6259	0.183233	1.29524			0.941719		2674.28	36.2918	2663.62	79.1142	2682.34	21.4176			0.698005	2682.34	21.4176
150413-02_69	Price Canyon	L. Castlegate	12.92	4.17312	0.503115	4.14487	0.186249	0.48473			0.993231		2673.83	39.334	2627.17	89.4358	2709.3	7.99758			3.03149	2709.3	7.99758
150413-02_18	Price Canyon	L. Castlegate	13.6395	3.76087	0.52931	3.75361	0.18689	0.23354			0.99807		2725	35.5823	2738.54	83.7505	2714.97	3.85111			-0.868173	2714.97	3.85111
150413-02_50	Price Canyon	L. Castlegate	12.7857	1.303	0.492391	1.11595	0.188328	0.672672			0.85644		2663.99	12.2709	2581.01	23.735	2727.6	11.0793			5.37439	2727.6	11.0793
150413-02_4	Price Canyon	L. Castlegate	13.6	2.87853	0.507166	2.858	0.194486	0.343186			0.992868		2722.27	27.2278	2644.52	61.9973	2780.47	5.62501			4.88944	2780.47	5.62501
150413-02_84	Price Canyon	L. Castlegate	14.6664	3.05515	0.544463	2.65827	0.195368	1.50583			0.870095		2793.84	29.0433	2802.1	60.4103	2787.87	24.659			-0.510561	2787.87	24.659
150413-02_85	Price Canyon	L. Castlegate	15.414	7.83081	0.549107	7.80486	0.203591	0.636897			0.996687		2841.18	74.7022	2821.46	178.356	2855.19	10.3694			1.18134	2855.19	10.3694
061814-01_64	Price Canyon	Blackhawk Fm.	0.159782	25.4106	0.017308	9.70258	0.0669211	23.475	0.0100684	22.6069	0.382814		150.512	35.561	110.62	10.6414	835.32	489.131	202.488	45.599	26.5044	110.62	10.6414
061814-01_123	Price Canyon	Blackhawk Fm.	0.404935	19.8406	0.0486375	12.8174	0.0603943	15.1151	0.0178678	24.8161	0.647781		345.221	58.1282	306.151	38.3238	617.73	326.248	357.96	88.2421	11.3174	306.151	38.3238
061814-01_193	Price Canyon	Blackhawk Fm.	0.479495	16.008	0.0492648	11.3537	0.0705819	11.2482	0.0276485	23.0945	0.711525		397.726	52.7263	310.007	34.3647	945.328	230.385	551.252	125.98	22.0553	310.007	34.3647
061814-01_129	Price Canyon	Blackhawk Fm.	0.4704	12.5779	0.0555957	8.81786	0.0613825	8.91787	0.0246681	16.829	0.705212		391.465	40.8795	348.785	29.9383	652.665	191.369	492.546	82.055	10.9028	348.785	29.9383
061814-01_33	Price Canyon	Blackhawk Fm.	0.553255	19.2913	0.0579699	11.6188	0.0692157	15.3815	0.0295023	18.3318	0.603548		447.127	69.881	363.268	41.0406	905.176	317.046	587.681	106.462	18.7551	363.268	41.0406
061814-01_208	Price Canyon	Blackhawk Fm.	0.48939	17.8338	0.0598227	12.0435	0.05934	13.1222	0.0217105	13.2686	0.677198		404.495	59.5688	374.547	43.8237	579.595	285.054	434.123	57.0682	7.40367	374.547	43.8237
061814-01_113	Price Canyon	Blackhawk Fm.	0.50826	15.5068	0.0619439	10.8526	0.0595222	11.043	0.0257143	15.4474	0.702039		417.278	53.1076	387.437	40.8089	586.251	239.619	513.174	78.4259	7.15151	387.437	40.8089
061814-01_48	Price Canyon	Blackhawk Fm.	0.500648	20.8619	0.0620282	14.591	0.0585811	14.8683	0.0194553	17.4987	0.701474		412.141	70.7849	387.948	54.9372	551.562	324.525	389.459	67.6107	5.87	387.948	54.9372
061814-01_68	Price Canyon	Blackhawk Fm.	0.470421	19.149	0.0637014	12.8869	0.0535386	14.1468	0.018341	14.9837	0.673949		391.48	62.2822	398.097	49.7514	351.69	319.67	367.355	54.6199	-1.69021	398.097	49.7514
061814-01_173	Price Canyon	Blackhawk Fm.	0.519981	13.5465	0.0638589	8.57327	0.0590364	10.4564	0.0177947	12.4719	0.635762		425.138	47.0888	399.051	33.1746	568.437	227.576	356.508	44.1218	6.13618	399.051	33.1746
061814-01_126	Price Canyon	Blackhawk Fm.	0.511131	13.7363	0.0649118	8.91518	0.0571235	10.4058	0.0196646	9.70434	0.652803		419.21	47.211	405.427	35.0318	496.303	229.286	393.607	37.8629	3.28765	405.427	35.0318
061814-01_94	Price Canyon	Blackhawk Fm.	0.548214	12.2024	0.0651103	8.27363	0.0610848	8.93081	0.022793	14.1745	0.681433		443.826	43.9001	406.629	32.6042	642.222	191.979	455.525	63.947	8.38093	406.629	32.6042
061814-01_14	Price Canyon	Blackhawk Fm.	0.550719	18.7831	0.0654704	13.0523	0.0610152	13.4849	0.0255637	15.467	0.696118		445.467	67.8326	408.808	51.7034	639.77	289.993	510.206	78.0766	8.22935	408.808	51.7034
061814-01_265	Price Canyon	Blackhawk Fm.	0.573823	20.7016	0.0654802	13.8582	0.0635691	15.3561	0.022474	25.628	0.670641		460.484	76.786	408.868	54.9036	727.326	325.518	449.22	114.178	11.2092	408.868	54.9036
061814-01_249	Price Canyon	Blackhawk Fm.	0.505876	16.9958	0.0662356	11.5377	0.0553882	12.4514	0.0243564	34.1654	0.680641		415.672	58.036	413.436	46.2042	427.926	277.585	486.398	164.867	0.537891	413.436	46.2042
061814-1_08	Price Canyon	Blackhawk Fm.	0.531637	14.7868	0.0664109	9.70642	0.0580541	11.1481	0.0211869	10.1597	0.656967		432.896	52.161	414.496	38.967	531.806	244.148	423.761	42.6498	4.25034	414.496	38.967
061814-01_119	Price Canyon	Blackhawk Fm.	0.51411	13.695	0.0664914	8.85765	0.0560847	10.4072	0.019825	10.442	0.650016		421.209	47.2503	414.983	35.5999	455.722	230.886	396.787	41.0701	1.47826	414.983	35.5999
061814-01_66	Price Canyon	Blackhawk Fm.	0.577799	18.1837	0.0685278	9.57977	0.0611245	15.4401	0.0210188	9.76111	0.528207		463.046	67.7142	427.28	39.6059	643.617	331.827	420.434	40.656	7.72404	427.28	39.6059
061814-01_98	Price Canyon	Blackhawk Fm.	0.539728	15.8537	0.0685647	10.3805	0.0571152	11.9562	0.0227879	13.2115	0.656693		438.245	56.4858	427.502	42.9379	495.985	263.465	455.424	59.5834	2.45123	427.502	42.9379
061814-01_247	Price Canyon	Blackhawk Fm.	0.823979	45.8974	0.069721	12.4194	0.0857091	44.1773	0.0216806	23.1295	0.271197		610.266	213.627	434.474	52.182	1331.63	854.674	433.53	99.4499	28.8057	434.474	52.182
061814-1_02	Price Canyon	Blackhawk Fm.	0.541222	15.7401	0.0707569	11.2114	0.0555046	11.2278	0.0229317	40.5462	0.700927		439.23	56.1811	440.714	47.7601	432.607	250.1	458.267	184.559	-0.337886	440.714	47.7601
061814-01_140	Price Canyon	Blackhawk Fm.	0.571259	13.4242	0.0737297	9.62218	0.0561952	9.3272	0.0203235	11.7209	0.719202		458.829	49.5962	458.587	42.5937	460.087	206.768	406.664	47.2434	0.0527094	458.587	42.5937
061814-01_45	Price Canyon	Blackhawk Fm.	0.574668	17.5465	0.0738908	11.619	0.0564448	13.0947	0.0217748	10.9358	0.665635		461.029	65.1092	459.554	51.5377	469.908	289.791	435.394	47.1596	0.319923	459.554	51.5377
061814-01_67	Price Canyon	Blackhawk Fm.	0.599869	14.209	0.0741398	8.49077	0.0586573	11.3721	0.0225071	7.88956	0.599542		477.15	54.1471	461.049	37.7799	554.399	248.095	449.876	35.1316	3.37459	461.049	37.7799
061814-01_222	Price Canyon	Blackhawk Fm.	0.660621	13.083	0.0751751	9.03669	0.0637432	9.42172	0.094599	31.9159	0.693824		514.994	52.8945	467.259	40.7313	733.122	199.534	1826.94	565.344	9.26907	467.259	40.7313
061814-01_22	Price Canyon	Blackhawk Fm.	0.821126	14.7245	0.0803072	9.18587	0.0741805	11.4492	0.0663633	21.8013	0.628825		608.677	67.5119	497.956	44.0202	1046.38	230.885	1298.72	276.11	18.1904	497.956	44.0202
061814-01_258	Price Canyon	Blackhawk Fm.	0.69624	18.0291	0.080599	13.5472	0.0626411	11.8658	0.0460496	25.1399	0.752893		536.542	75.2785	499.697	65.1401	696.07	252.815	909.971	224.939	6.86717	499.697	65.1401
061814-01_85	Price Canyon	Blackhawk Fm.	1.00617	18.412	0.0877664	11.3247	0.0831287	14.4889	0.0645668	22.2124	0.617052		706.937	94.0316	542.314	58.9048	1272.24	282.664	1264.64	274.15	23.2868	542.314	58.9048
061814-01_136	Price Canyon	Blackhawk Fm.	0.915274	23.8177	0.0879429	9.70614	0.0754939	21.7341	0.0295668	11.827	0.409036		659.858	116.074	543.36	50.5788	1081.68	435.97	588.947	68.7663	17.655	543.36	50.5788
061814-01_125	Price Canyon	Blackhawk Fm.	1.13014	16.9582	0.0884686	8.48927	0.0926706	14.6489	0.122566	36.1267	0.503801		767.819	91.6029	546.474	44.4804	1481.16	277.677	2336.89	813.413	28.8277	546.474	44.4804
061814-01_157	Price Canyon	Blackhawk Fm.	0.719714	12.8302	0.0898165	9.13326	0.0581155	8.96367	0.0433714	30.6382	0.715484		550.498	54.5739	554.452	48.5238	534.117	196.231	858.155	259.073	-0.718233	554.452	48.5238
061814-01_299	Price Canyon	Blackhawk Fm.	0.758035	14.4781	0.0912414	9.13128	0.0602364	11.1933	0.034694	18.8133	0.634276		572.876	63.4701	562.875	49.2186	612.076	241.827	689.353	127.907	1.7457	562.875	49.2186
061814-01_220	Price Canyon	Blackhawk Fm.	0.884089	19.0208	0.0934606	11.7612	0.0686198	14.9246	0.0318391	11.9715	0.619946		643.189	90.868	575.971	64.8051	887.332	308.472	633.506	74.8024	10.4507	575.971	64.8051
061814-01_266	Price Canyon	Blackhawk Fm.	0.754148	14.386	0.0942115	9.92827	0.0580687	10.3766	0.0268585	8.57854	0.692627		570.628	62.8803	580.396	55.1067	532.356	227.231	535.708	45.4032	-1.71181	580.396	55.1067
061814-01_209	Price Canyon	Blackhawk Fm.	1.05846	17.319	0.0960966	14.5942	0.079897	9.28182	0.0692211	18.7744	0.844262		733.065	90.6645	591.493	82.4862	1194.45	183.115	1352.81	247.175	19.3124	591.493	82.4862
061814-01_206	Price Canyon	Blackhawk Fm.	0.798536	14.4543	0.0975633	9.60315	0.0593687	10.7655	0.0299253	10.5714	0.667299		596.002	65.253	600.113	55.0299	580.643	233.819	595.983	62.1798	-3.35317	600.113	55.0299
061814-01_127	Price Canyon	Blackhawk Fm.	0.865822	12.6635	0.0984233	8.7157	0.0638177	9.13633	0.0300335	9.68533	0.692456		633.296	59.7367	605.162	50.3451	735.594	193.413	598.107	57.1607	17.7315	605.162	50.3451
061814-01_188	Price Canyon	Blackhawk Fm.	0.852458	13.4571	0.0989223	9.77345	0.0626149	9.23672	0.0417731	21.5474	0.72724		625.997	62.9596	608.09	56.7158	695.179	196.828	827.169	175.395	12.5276	608.09	56.7158
061814-01_24	Price Canyon	Blackhawk Fm.	0.873043	13.2553	0.100175	8.87352	0.0632317	9.77834	0.0319852	13.7241	0.675161		637.218	62.8146	615.435	52.0861	716.034	207.662	636.369	86.1585	14.0495	615.435	52.0861
061814-01_108	Price Canyon	Blackhawk Fm.	0.85772	13.3218	0.10102	8.82095	0.0616053	9.94864	0.029538	10.0416	0.665063		628.877	62.5327	620.381	52.174	660.437	213.214	588.381	58.3153	6.06501	620.381	52.174
061814-01_204	Price Canyon	Blackhawk Fm.	0.865362	11.3983	0.103112	7.90225	0.0608733	8.16501	0.0300244	10.5131	0.697769		633.046	53.7414	632.62	47.6175	634.759	175.735	597.928	62.0354	0.33699	632.62	47.6175
061814-01_102	Price Canyon	Blackhawk Fm.	0.879755	14.6518	0.103365	8.67361	0.0617591	11.7819	0.0311628	10.3089	0.594467		640.85	69.737	634.099	52.382	665.779	252.279	620.256	63.0685	4.75824	634.099	52.382
061814-01_213	Price Canyon	Blackhawk Fm.	0.905256	12.2295	0.103607	7.73874	0.0633821	9.42908	0.0332553	8.55315	0.636835		654.533	59.0672	635.51	46.8349	721.076	200.08	661.228	55.7175	11.8664	635.51	46.8349
061814-01_62	Price Canyon	Blackhawk Fm.	0.905524	16.2332	0.108217	11.0463	0.0606536	11.8743	0.0317858	8.76906	0.681861		654.675	78.4844	662.384	69.5381	626.974	255.902	632.463	54.6762	-5.64788	662.384	69.5381
061814-01_95	Price Canyon	Blackhawk Fm.	0.995925	13.8926	0.114971	8.82236	0.0628477	10.7008	0.0498445	31.4721	0.637751		701.739	70.5008	701.553	58.6462	703.081	227.731	983.165	304.297	0.217355	701.553	58.6462
061814-01_154	Price Canyon	Blackhawk Fm.	1.09728	11.7727	0.120536	8.63818	0.0660161	7.94184	0.108028	17.4379	0.738197		752.032	62.6202	733.648	59.9024	806.885	166.22	2073.41	346.587	9.0765	733.648	59.9024
061814-01_128	Price Canyon	Blackhawk Fm.	1.47039	19.0799	0.143207	12.1529	0.0744876	14.6773	0.0251095	153.95	0.638944		918.29	115.811	862.773	98.1454	1054.71	295.611	501.253	501.253	18.1979	862.773	98.1454
061814-01_82	Price Canyon	Blackhawk Fm.	1.50348	13.9205	0.145195	10.0672	0.075087	9.57205	0.0372352	13.1318	0.726075		931.799	85.0852	873.97	82.285	1070.83	192.321	738.933	95.5081	18.3839	873.97	82.285
061814-01_199	Price Canyon	Blackhawk Fm.	1.45762	20.7153	0.145873	14.7462	0.0724596	14.5241	0.0442944	18.0174	0.713033		913.024	125.386	877.787	121.029	998.877	295.039	876.026	155.058	12.1226	877.787	121.029
061814-01_185	Price Canyon	Blackhawk Fm.	1.51071	14.4656	0.149424	9.47919	0.0734385	10.9162	0.048849	15.2812	0.656148		934.726	88.6037	897.734	79.4423	1026.08	220.864	963.99	144.366	12.5082	897.734	79.4423
061814-01_58	Price Canyon	Blackhawk Fm.	1.4225	14.9743	0.151937	10.2309	0.0678711	10.9085	0.0489629	9.2268	0.685072		898.409	89.5135	911.81	86.9942	864.621	226.256	966.184	87.2388	-5.45771	911.81	86.9942
061814-01_284	Price Canyon	Blackhawk Fm.	1.61283	12.0029	0.155029	8.16534	0.0754645	8.73851	0.0466493	18.0687	0.685561		975.207	75.3684	929.091	70.6528	1080.9	175.309	921.555	163.433	14.0447	929.091	70.6528
061814-01_243	Price Canyon	Blackhawk Fm.	1.55631	15.1004	0.155432	10.1156	0.0726193	11.1809	0.0464637	13.2594	0.672133		953.003	93.6116	931.34	87.7269	1003.35	226.974	917.97	119.347	7.17686	931.34	87.7269
061814-01_192	Price Canyon	Blackhawk Fm.	1.68684	15.6968	0.155458	10.421	0.0786893	11.7023	0.0566615	12.071	0.666485		1003.57	100.388	931.485	90.3884	1164.33	231.884	1113.98	131.256	19.9982	931.485	90.3884
061814-01_289	Price Canyon	Blackhawk Fm.	1.57752	18.3775	0.157318	12.957	0.072756	12.9951	0.0568338	13.0811	0.707096		961.392	114.691	941.858	113.552	1007.16	263.655	1117.28	142.689	6.48427	941.858	113.552
061814-01_223	Price Canyon	Blackhawk Fm.	1.6552	15.0932	0.159	10.347	0.0755097	10.9546	0.0415473	13.1525	0.687912		991.542	95.8188	951.22	91.5116	1082.1	219.728	822.788	106.324	12.0951	951.22	91.5116
061814-01_27	Price Canyon	Blackhawk Fm.	1.73389	12.8339	0.16099	8.90402	0.0781454	9.17267	0.0547518	10.0894	0.699429		1021.2	82.8304	962.273	79.5968	1150.57	182.126	1077.42	106.137	16.3657	962.273	79.5968
061814-01_184	Price Canyon	Blackhawk Fm.	1.6404	13.7488	0.161391	9.58267	0.0738217	9.84702	0.0446546	11.8604	0.697885		985.865	86.9427	964.5	85.848	1036.6	198.869	882.997	102.733	6.95529	964.5	85.848
061814-01_71	Price Canyon	Blackhawk Fm.	1.62247	11.7563	0.161695	8.03728	0.0727558	8.55065	0.0469291	8.9187	0.686298		978.948	73.9833	966.188	72.119	1007.16	173.483	926.957	80.9673	4.06791	966.188	72.119
061814-01_55	Price Canyon	Blackhawk Fm.	1.66941	17.7307	0.163949	9.52069	0.0738345	14.9367	0.0451897	14.5478	0.538829		996.96	113.056	978.684	86.4544	1036.95	301.643	893.348	127.533	5.61869	978.684	86.4544
061814-01_275	Price Canyon	Blackhawk Fm.	1.80012	14.9805	0.164211	10.0105	0.0795175	11.1029	0.0550578	18.2624	0.671337		1045.5	98.091	980.136	91.0272	1185.05	219.343	1083.29	193.55	17.2914	980.136	91.0272
061814-01_56	Price Canyon	Blackhawk Fm.	1.6583	15.836	0.16462	11.4802	0.0730402	10.8798	0.0542617	10.5389	0.726632		992.727	100.636	982.398	104.618	1015.07	220.482	1068.03	109.934	3.21856	982.398	104.618
061814-01_130	Price Canyon	Blackhawk Fm.	1.80058	17.4297	0.165555	12.7666	0.0789027	11.828	0.0546531	11.6757	0.734503		1045.67	114.265	987.573	116.909	1169.7	234.19	1075.53	122.665	15.5701	987.573	116.909
061814-01_97	Price Canyon	Blackhawk Fm.	1.68281	12.9403	0.16605	8.92016	0.07353	9.34013	0.0420385	23.3328	0.692123		1002.04	82.5993	990.308	81.8908	1028.6	188.906	832.318	191.16	3.72244	990.308	81.8908
061814-01_148	Price Canyon	Blackhawk Fm.	1.75897	11.9636	0.166714	8.56306	0.0765054	8.30287	0.0468959	9.9832	0.719975		1030.47	77.5973	993.983	78.8819	1108.33	165.889	926.317	90.5916	10.3167	993.983	78.8819
061814-1_09	Price Canyon	Blackhawk Fm.	1.85045	13.2535	0.168737	9.37428	0.0795293	9.3535	0.0513932	10.5105	0.708476		1063.59	87.5791	1005.15	87.2522	1185.34	184.774	1012.96	104.111	15.2016	1005.15	87.2522
061814-01_273	Price Canyon	Blackhawk Fm.	1.78857	12.6378	0.168898	8.47586	0.0768209	9.32376	0.0531548	8.38412	0.675069		1041.3	82.4858	1006.04	78.9536	1116.54	186.059	1046.8	85.7122	9.89716	1006.04	78.9536
061814-01_219	Price Canyon	Blackhawk Fm.	1.70603	17.4398	0.169329	9.97315	0.0730865	14.2813	0.0534793	15.7796	0.573948		1010.79	112.094	1008.41	93.1056	1016.35	289.361	1053.02	162.56	0.781033	1008.41	93.1056
061814-01_231	Price Canyon	Blackhawk Fm.	1.78872	13.9861	0.170383	9.78288	0.0761429	9.95491	0.0487678	11.0318	0.702419		1041.36	91.3344	1014.22	91.8148	1098.83	199.178	962.424	103.951	7.6999	1014.22	91.8148
061814-01_104	Price Canyon	Blackhawk Fm.	1.69721	14.248	0.170644	10.1101	0.072169	10.0071	0.0510204	11.4286	0.711832		1007.48	91.279	1015.66	95.0107	990.712	203.527	1005.79	112.447	-2.51815	1015.66	95.0107
061814-01_47	Price Canyon	Blackhawk Fm.	1.71003	15.2086	0.171306	10.9667	0.072452	10.4746	0.055635	10.6815	0.725032		1012.29	97.7436	1019.3	103.403	998.665	212.784	1094.34	114.106	-2.0666	1019.3	103.403
061814-01_88	Price Canyon	Blackhawk Fm.	1.7809	11.5563	0.172025	7.79319	0.0750687	8.4842	0.0488492	9.51895	0.678989		1038.51	75.2831	1023.26	73.7405	1070.34	170.477	963.993	89.8074	4.39897	1023.26	73.7405
061814-01_179	Price Canyon	Blackhawk Fm.	1.75321	12.1922	0.172076	8.57521	0.0738875	8.63721	0.040755	16.4182	0.705793		1028.35	78.9914	1023.54	81.1618	1038.4	174.388	807.407	130.368	1.43043	1023.54	81.1618
061814-01_238	Price Canyon	Blackhawk Fm.	1.9085	15.3417	0.173045	10.5108	0.0799915	11.1423	0.128537	49.6697	0.687406		1084.06	102.565	1028.87	99.9614	1196.78	219.746	2444.1	1177.07	14.03	1028.87	99.9614
061814-01_293	Price Canyon	Blackhawk Fm.	1.72962	10.7103	0.173477	7.35809	0.0722823	7.77026	0.0492341	8.47612	0.688232		1019.61	69.016	1031.24	70.1243	993.9	157.959	971.41	80.5508	-3.75718	1031.24	70.1243
061814-01_13	Price Canyon	Blackhawk Fm.	1.82093	12.5326	0.174918	9.03306	0.07551	8.65568	0.0582732	8.65461	0.723189		1053.02	82.323	1039.15	86.6976	1082.11	173.616	1144.79	96.5539	3.96955	1039.15	86.6976
061814-01_190	Price Canyon	Blackhawk Fm.	1.77451	13.6393	0.177768	9.76986	0.0724369	9.459	0.0521288	11.3318	0.720458		1036.17	88.8013	1054.77	95.0673	998.24	192.165	1027.1	113.801	-5.66266	1054.77	95.0673
061814-01_169	Price Canyon	Blackhawk Fm.	1.98026	15.6441	0.177964	11.1248	0.0807019	10.9652	0.0504931	10.6109	0.713246		1108.81	105.931	1055.84	108.355	1214.2	215.708	995.647	103.351	13.042	1055.84	108.355
061814-01_210	Price Canyon	Blackhawk Fm.	1.9615	15.967	0.178733	9.12071	0.0796068	13.075	0.0588099	15.9678	0.573974		1102.4	107.784	1060.05	89.1589	1187.26	258.219	1155.04	180.064	10.7148	1060.05	89.1589
061814-01_121	Price Canyon	Blackhawk Fm.	1.84412	12.2459	0.178797	8.20272	0.0748167	9.04473	0.0515981	10.9301	0.674165		1061.33	80.7935	1060.4	80.2084	1063.58	181.924	1016.9	108.69	0.299251	1060.4	80.2084
061814-01_181	Price Canyon	Blackhawk Fm.	1.91559	11.7917	0.179256	8.62714	0.0775793	8.02127	0.0625346	18.8242	0.732986		1086.53	78.8234	1062.91	84.5427	1136.12	159.604	1226.02	225.178	6.44387	1062.91	84.5427
061814-01_77	Price Canyon	Blackhawk Fm.	2.09995	14.3958	0.179459	10.4085	0.0848567	9.91035	0.0796181	23.647	0.725316		1148.79	99.335	1064.02	102.1	1312.27	192.251	1548.41	355.588	18.9175	1064.02	102.1
061814-01_194	Price Canyon	Blackhawk Fm.	1.89917	13.423	0.17961	9.32955	0.076678	9.60907	0.0519982	9.9871	0.698244		1080.8	89.5143	1064.84	91.5799	1112.83	191.858	1024.59	100.023	4.3119	1064.84	91.5799
061814-01_267	Price Canyon	Blackhawk Fm.	1.99754	14.1091	0.180275	9.77934	0.0803823	10.1342	0.0484092	11.4104	0.695768		1114.68	95.7513	1068.48	96.297	1206.38	199.585	955.511	106.772	11.4313	1068.48	96.297
061814-01_15	Price Canyon	Blackhawk Fm.	1.94734	12.9589	0.180484	8.93763	0.0782631	9.34796	0.0551875	10.1948	0.692575		1097.53	87.1516	1069.62	88.0939	1153.56	185.525	1085.77	108.06	7.27681	1069.62	88.0939
061814-01_195	Price Canyon	Blackhawk Fm.	1.97023	13.2302	0.18193	9.24528	0.078532	9.42239	0.0535117	9.75546	0.701998		1105.39	89.3395	1077.51	91.7444	1160.36	186.816	1053.64	100.404	7.14056	1077.51	91.7444
061814-01_296	Price Canyon	Blackhawk Fm.	1.99186	11.224	0.187176	7.73096	0.0771298	8.11166	0.0573608	8.92429	0.691157		1112.75	76.0159	1106.06	78.5794	1124.55	161.679	1127.36	98.0918	1.64392	1106.06	78.5794
061814-01_234	Price Canyon	Blackhawk Fm.	2.07148	13.7695	0.188629	9.7977	0.07965	9.63406	0.055419	9.50213	0.714474		1139.42	94.5657	1113.94	100.239	1188.33	190.234	1090.2	101.101	6.26027	1113.94	100.239
061814-01_241	Price Canyon	Blackhawk Fm.	2.17968	15.9372	0.188916	11.6394	0.0836808	10.855	0.0503987	17.2672	0.732186		1174.58	111.375	1115.5	119.238	1285.14	211.382	993.832	168.154	13.2003	1115.5	119.238
061814-01_196	Price Canyon	Blackhawk Fm.	2.1402	13.2558	0.190839	9.06181	0.0813233	9.63508	0.0573467	10.5289	0.686793		1161.89	91.985	1125.92	93.6219	1229.27	189.13	1127.09	115.753	8.40751	1125.92	93.6219
061814-01_274	Price Canyon	Blackhawk Fm.	2.03799	12.4762	0.191461	8.93461	0.0772154	8.65384	0.0565089	8.5875	0.720343		1128.29	85.1812	1129.28	92.56	1126.76	172.429	1111.07	93.0516	-0.224046	1129.28	92.56
061814-01_300	Price Canyon	Blackhawk Fm.	1.94343	16.6085	0.19166	11.7029	0.0735239	11.745	0.0555267	12.9779	0.707053		1096.18	111.796	1130.36	121.351	1028.43	237.55	1092.27	138.464	-9.91173	1130.36	121.351
061814-01_205	Price Canyon	Blackhawk Fm.	2.11555	15.3586	0.19234	11.4821	0.0797805	10.1606	0.0555284	12.4489	0.749899		1153.89	106.28	1134.04	119.415	1191.57	200.536	1092.3	132.805	4.82804	1134.04	119.415
061814-01_69	Price Canyon	Blackhawk Fm.	2.12868	12.3897	0.193269	8.54954	0.0798531	8.94053	0.0572578	8.61026	0.692306		1158.16	85.7971	1139.06	89.2714	1193.36	176.41	1125.39	94.4711	4.55037	1139.06	89.2714
061814-01_203	Price Canyon	Blackhawk Fm.	2.08939	10.9602	0.194164	7.72151	0.0780517	7.72655	0.0586285	7.97768	0.709255		1145.33	75.4034	1143.89	80.9372	1148.19	153.467	1151.57	89.4987	0.374068	1143.89	80.9372
061814-01_51	Price Canyon	Blackhawk Fm.	2.05396	18.5056	0.196595	13.5598	0.0758094	12.5547	0.0585896	16.6109	0.734669		1133.61	127.034	1157	143.638	1090.04	251.524	1150.83	186.682	-6.14276	1157	143.638
061814-01_202	Price Canyon	Blackhawk Fm.	2.22962	13.2225	0.197874	9.40209	0.0817274	9.25403	0.0564907	11.621	0.714279		1190.4	92.9468	1163.89	100.128	1238.99	181.397	1110.72	125.986	6.06157	1163.89	100.128
061814-01_153	Price Canyon	Blackhawk Fm.	2.06969	12.8333	0.199289	9.44519	0.0753124	8.6354	0.0573572	10.5689	0.739751		1138.83	88.0777	1171.5	101.187	1076.85	173.345	1127.29	116.213	-8.78958	1171.5	101.187
061814-01_114	Price Canyon	Blackhawk Fm.	2.54571	12.1597	0.201498	8.88509	0.0916474	8.25679	0.0839054	11.8835	0.73412		1285.21	88.8721	1183.36	96.0637	1460.09	156.951	1628.51	186.794	18.9529	1183.36	96.0637
061814-1_05	Price Canyon	Blackhawk Fm.	2.25446	15.9789	0.202598	11.5157	0.0807048	11.1215	0.0539761	11.852	0.718035		1198.18	112.855	1189.26	125.077	1214.26	218.78	1062.55	123.055	2.05901	1189.26	125.077
061814-01_189	Price Canyon	Blackhawk Fm.	2.33852	13.4488	0.210002	9.30979	0.0809197	9.69155	0.0599983	12.7278	0.693326		1224.07	95.9381	1228.83	104.168	1219.49	190.507	1177.71	146.14	-0.765573	1219.49	190.507
061814-01_186	Price Canyon	Blackhawk Fm.	2.47964	13.2259	0.222216	9.64337	0.0810636	9.03838	0.062756	11.8531	0.730059		1266.11	95.9843	1293.57	113.037	1222.99	177.578	1230.23	141.968	-5.77169	1222.99	177.578
061814-01_134	Price Canyon	Blackhawk Fm.	2.37996	18.004	0.211068	12.8378	0.081797	12.5926	0.0630779	9.81857	0.714699		1236.6	129.419	1234.5	144.256	1240.66	246.78	1236.35	118.098	0.496253	1240.66	246.78
061814-01_242	Price Canyon	Blackhawk Fm.	2.56085	13.6803	0.219736	9.52806	0.0845244	9.78152	0.0616586	10.7669	0.699119		1289.53	100.222	1280.48	110.662	1304.65	189.955	1209.35	126.787	1.8528	1304.65	189.955
061814-01_107	Price Canyon	Blackhawk Fm.	2.84163	13.1065	0.240152	9.07516	0.0858554	9.4203	0.0664285	10.6919	0.695272		1366.6	98.7492	1387.49	113.3	1334.93	182.165	1299.95	135.065	-3.93725	1334.93	182.165
061814-01_276	Price Canyon	Blackhawk Fm.	2.52211	12.5804	0.21287	8.39859	0.0859395	9.31716	0.0660043	9.97565	0.671951		1278.43	91.7202	1244.09	95.0291	1336.82	180.123	1291.91	125.231	6.93686	1336.82	180.123
061814-01_294	Price Canyon	Blackhawk Fm.	2.45958	24.8605	0.205775	20.0027	0.0866427	14.756	0.0790875	10.451	0.804797		1260.24	181.369	1206.27	220.141	1352.56	284.645	1538.47	155.414	10.816	1352.56	284.645
061814-01_60	Price Canyon	Blackhawk Fm.	2.90725	12.9722	0.243049	9.46758	0.086706	8.83716	0.078117	9.44429	0.732064		1383.8	98.3124	1402.53	119.347	1353.97	170.437	1520.28	138.789	-3.58628	1353.97	170.437
061814-01_149	Price Canyon	Blackhawk Fm.	2.93417	12.0717	0.244897	9.10861	0.0868783	7.86651	0.0235647	33.562	0.75853		1390.77	91.6657	1412.11	115.523	1357.8	151.636	470.771	156.781	-3.99976	1357.8	151.636
061814-01_176	Price Canyon	Blackhawk Fm.	2.67207	16.4402	0.222819	11.6872	0.0869517	11.5367	0.0626743	11.8237	0.71244		1320.77	122.056	1296.75	137.304	1359.42	222.333	1228.67	141.441	4.61025	1359.42	222.333
061814-01_74	Price Canyon	Blackhawk Fm.	2.60678	14.3534	0.215833	8.87676	0.0875835	11.2522	0.0691076	11.6747	0.620848		1302.55	105.715	1259.82	101.59	1373.36	216.432	1350.67	153.112	8.26765	1373.36	216.432
061814-01_297	Price Canyon	Blackhawk Fm.	2.62443	11.4593	0.215954	7.74923	0.0880893	8.40386	0.0647626	8.55018	0.679842		1307.51	84.4466	1260.46	88.7256	1384.43	161.4	1268.35	105.388	8.95459	1384.43	161.4
061814-01_271	Price Canyon	Blackhawk Fm.	2.7666	13.0008	0.227468	9.65827	0.0882375	8.649	0.0666302	18.7267	0.746613		1346.57	97.257	1321.21	115.391	1387.66	166.034	1303.78	237.84	4.78847	1387.66	166.034
061814-01_96	Price Canyon	Blackhawk Fm.	2.79721	20.4656	0.228459	14.8193	0.0888337	14.0916	0.0711896	17.8869	0.725188		1354.79	154.255	1326.42	177.707	1400.58	270.038	1389.99	241.709	5.29493	1400.58	270.038
061814-01_216	Price Canyon	Blackhawk Fm.	2.86406	21.9905	0.23361	16.2989	0.0889359	14.7372	0.0682858	14.6431	0.742214		1372.51	166.991	1353.39	199.034	1402.78	282.324	1335.12	190.077	3.52091	1402.78	282.324
061814-01_252	Price Canyon	Blackhawk Fm.	3.19897	14.5193	0.258918	10.2121	0.0895938	10.2853	0.0726816	10.837	0.705828		1456.91	112.778	1484.3	135.414	1416.89	196.659	1418.12	148.962	-4.75805	1416.89	196.659
061814-01_214	Price Canyon	Blackhawk Fm.	2.59292	12.5912	0.208723	8.74555	0.0901163	9.01642	0.0624333	10.2582	0.698015		1298.64	92.5203	1222.01	97.3602	1427.99	172.138	1224.09	122.212	14.4248	1427.99	172.138
061814-01_76	Price Canyon	Blackhawk Fm.	2.88378	17.2044	0.231944	12.1348	0.0901611	12.1693	0.066736	12.8384	0.70688		1377.68	130.423	1344.68	147.306	1428.94	232.301	1305.78	162.997	5.89696	1428.94	232.301
061814-01_239	Price Canyon	Blackhawk Fm.	2.81388	17.1921	0.22595	12.2715	0.0903244	12.0103	0.0677412	13.7352	0.715518		1359.24	129.492	1313.24	145.824	1432.4	229.16	1324.82	176.903	8.3189	1432.4	229.16
061814-01_147	Price Canyon	Blackhawk Fm.	2.91133	14.5305	0.230517	11.0355	0.0915779	9.40787	0.0703244	10.9373	0.762108		1384.86	110.25	1337.21	133.286	1458.65	178.866	1373.66	145.774	8.32565	1458.65	178.866
061814-01_177	Price Canyon	Blackhawk Fm.	2.69653	12.6364	0.211029	8.24794	0.0926543	9.54359	0.067584	11.8844	0.655448		1327.51	93.864	1234.3	92.6575	1480.83	180.911	1321.84	152.641	16.6484	1480.83	180.911
061814-01_12	Price Canyon	Blackhawk Fm.	3.07258	13.6692	0.240175	9.86078	0.0927901	9.43858	0.0743418	11.3307	0.723335		1425.88	105.088	1387.61	123.119	1483.61	178.854	1449.38	159.101	6.47081	1483.61	178.854
061814-01_298	Price Canyon	Blackhawk Fm.	3.29112	13.7546	0.256191	9.63355	0.0931301	9.77485	0.0730752	9.5147	0.703541		1478.95	107.515	1470.32	126.668	1490.53	185.056	1425.54	131.389	1.35598	1490.53	185.056
061814-01_65	Price Canyon	Blackhawk Fm.	2.6869	17.5307	0.208919	12.5495	0.0932326	12.2211	0.0615304	13.881	0.716951		1324.86	130.437	1223.06	139.828	1492.62	231.304	1206.91	163.284	18.0596	1492.62	231.304
061814-01_253	Price Canyon	Blackhawk Fm.	3.06896	17.6181	0.235893	12.9014	0.0943419	11.9673	0.0720208	13.8384	0.733901		1424.98	135.729	1365.31	158.773	1514.97	225.833	1405.67	188.791	9.87857	1514.97	225.833
061814-01_142	Price Canyon	Blackhawk Fm.	2.95543	13.5278	0.226833	10.5906	0.0944689	8.37456	0.0661252	11.7336	0.785345		1396.24	102.984	1317.88	126.245	1517.51	157.982	1294.2	147.636	13.1549	1517.51	157.982
061814-01_292	Price Canyon	Blackhawk Fm.	2.90238	11.7016	0.222741	8.44288	0.0944819	8.08712	0.0644174	15.251	0.722749		1382.53	88.5933	1296.34	99.1535	1517.77	152.555	1261.8	187.42	14.5889	1517.77	152.555
061814-01_291	Price Canyon	Blackhawk Fm.	2.73239	12.0243	0.209505	8.56007	0.0945814	8.42487	0.0851109	10.1784	0.713503		1337.31	89.6129	1226.18	95.5903	1519.75	158.884	1650.98	162.012	19.3172	1519.75	158.884
061814-01_159	Price Canyon	Blackhawk Fm.	3.00345	12.9027	0.225973	9.37009	0.0964015	8.82443	0.0735084	8.81704	0.729563		1408.5	98.5957	1313.36	111.348	1555.61	165.641	1433.7	122.4	15.5726	1555.61	165.641
061814-01_170	Price Canyon	Blackhawk Fm.	3.0207	11.0514	0.226747	7.81352	0.0966098	7.7681	0.0666585	8.91266	0.711296		1412.86	84.4995	1317.43	93.1068	1559.66	145.736	1304.31	112.892	15.531	1559.66	145.736
061814-01_268	Price Canyon	Blackhawk Fm.	3.8347	13.2772	0.287905	9.69868	0.0966262	9.02581	0.0821823	10.7809	0.733405		1600.06	107.328	1631.05	139.786	1559.98	169.324	1596.35	166.161	-4.55622	1559.98	169.324
061814-01_92	Price Canyon	Blackhawk Fm.	3.18823	12.5398	0.238333	9.10553	0.0970439	8.57977	0.0723111	11.0275	0.7293		1454.31	97.222	1378.02	112.983	1568.06	160.788	1411.14	150.867	12.1195	1568.06	160.788
061814-01_101	Price Canyon	Blackhawk Fm.	2.98435	13.8464	0.223122	11.0273	0.0970557	8.33662	0.059549	25.6351	0.79844		1403.64	105.688	1298.35	129.693	1568.29	156.226	1169.14	293.326	17.2123	1568.29	156.226
061814-01_34	Price Canyon	Blackhawk Fm.	3.5887	14.6144	0.26311	10.661	0.0989157	9.96718	0.0677907	12.794	0.731344		1547.03	116.563	1505.73	143.18	1603.78	185.929	1325.75	164.845	6.11332	1603.78	185.929
061814-01_227	Price Canyon	Blackhawk Fm.	3.13231	19.085	0.229253	13.0806	0.0991011	13.8692	0.0264073	15.2102	0.68695		1440.66	147.928	1330.59	157.292	1607.27	258.601	526.825	79.2512	17.2145	1607.27	258.601
061814-01_264	Price Canyon	Blackhawk Fm.	3.95812	15.9634	0.288347	11.4776	0.0995724	11.064	0.0867361	11.1584	0.720855		1625.65	130.105	1633.27	165.633	1616.11	206.064	1681.23	180.815	-1.06166	1616.11	206.064
061814-01_63	Price Canyon	Blackhawk Fm.	3.55933	14.8479	0.258374	11.6541	0.0998576	9.17329	0.0820723	7.87343	0.786321		1540.51	118.227	1481.52	154.283	1621.43	170.733	1594.3	121.065	8.62905	1621.43	170.733
061814-01_269	Price Canyon	Blackhawk Fm.	3.35584	18.8389	0.242379	15.4355	0.100445	10.7644	0.0802071	11.0447	0.820676		1494.15	148.42	1399.05	194.183	1632.33	200.069	1559.43	166.441	14.2911	1632.33	200.069
061814-01_278	Price Canyon	Blackhawk Fm.	3.4539	12.1995	0.249252	8.82631	0.1005	8.36886	0.0743973	9.63504	0.727614		1516.76	96.348	1434.62	113.535	1633.36	155.524	1450.43	135.305	12.1676	1633.36	155.524
061814-01_174	Price Canyon	Blackhawk Fm.	3.22612	13.1086	0.232186	9.03033	0.100739	9.46771	0.0846603	10.7574	0.691637		1463.46	101.949	1345.95	109.704	1637.77	175.846	1642.58	170.427	17.8184	1637.77	175.846
061814-01_79	Price Canyon	Blackhawk Fm.	3.48288	12.2267	0.250196	8.27617	0.100948	8.95929	0.0767983	9.22094	0.680489		1523.35	96.7455	1439.49	106.78	1641.62	166.276	1495.55	133.364	12.313	1641.62	166.276
061814-01_230	Price Canyon	Blackhawk Fm.	3.57425	14.7673	0.253708	10.5179	0.102181	10.3268	0.0780099	10.927	0.714832		1543.83	117.689	1457.57	137.231	1664.11	191.11	1518.27	160.46	12.4111	1664.11	191.11
061814-01_287	Price Canyon	Blackhawk Fm.	4.25184	18.1175	0.30178	12.5012	0.102222	13.0727	0.0867605	13.3515	0.692363		1684.09	150.016	1700.13	186.872	1664.86	241.905	1681.68	216.6	-2.1182	1664.86	241.905
061814-01_257	Price Canyon	Blackhawk Fm.	3.50859	18.1178	0.248651	14.4246	0.102322	10.9296	0.0739644	17.223	0.797552		1529.15	144.122	1431.52	185.221	1666.67	202.201	1442.28	241.182	14.1093	1666.67	202.201
061814-01_141	Price Canyon	Blackhawk Fm.	3.73314	13.2036	0.264095	9.54662	0.102491	9.08359	0.0778314	9.70424	0.725753		1578.5	106.127	1510.76	128.589	1669.72	167.985	1514.93	142.136	9.52054	1669.72	167.985
061814-01_20	Price Canyon	Blackhawk Fm.	3.71221	17.3294	0.26267	12.7965	0.102514	11.6451	0.0835792	13.1971	0.740569		1574	139.489	1503.49	171.646	1670.12	215.344	1622.43	206.8	9.97748	1670.12	215.344
061814-01_52	Price Canyon	Blackhawk Fm.	3.64153	13.536	0.257379	9.94212	0.102657	9.13547	0.077159	10.5749	0.737915		1558.66	108.239	1476.42	131.209	1672.7	168.881	1502.31	153.691	11.7347	1672.7	168.881
061814-01_106	Price Canyon	Blackhawk Fm.	3.85266	11.1047	0.270488	7.81012	0.10335	7.85167	0.0832284	9.51093	0.707168		1603.82	89.7527	1543.28	107.2	1685.13	144.922	1615.88	148.245	8.41781	1685.13	144.922
061814-01_286	Price Canyon	Blackhawk Fm.	4.31973	12.0087	0.3018	8.35346	0.103843	8.5646	0.0884488	8.77956	0.700985		1697.13	99.3292	1700.23	124.857	1693.91	157.907	1713.06	144.719	-0.373191	1693.91	157.907
061814-01_232	Price Canyon	Blackhawk Fm.	4.03503	17.0867	0.279149	12.266	0.104839	11.8617	0.0783921	10.4888	0.719781		1641.28	139.917	1587.07	172.599	1711.49	218.216	1525.44	154.702	7.26953	1711.49	218.216
061814-01_31	Price Canyon	Blackhawk Fm.	3.97734	15.6237	0.272091	11.2143	0.10602	10.8517	0.0809168	12.6966	0.719429		1629.58	127.433	1551.41	154.658	1732.08	199.127	1572.7	193.028	10.4309	1732.08	199.127
061814-01_200	Price Canyon	Blackhawk Fm.	3.84803	15.3256	0.261798	11.1168	0.106586	10.5156	0.104769	18.1745	0.727467		1602.86	124.13	1499.03	148.713	1741.84	192.727	2013.88	351.405	13.9398	1741.84	192.727
061814-01_261	Price Canyon	Blackhawk Fm.	4.47219	13.5791	0.302352	9.63682	0.107268	9.53129	0.0968507	10.023	0.712273		1725.83	113.15	1702.96	144.248	1753.51	174.436	1868.48	179.679	2.88264	1753.51	174.436
061814-1_04	Price Canyon	Blackhawk Fm.	3.92923	13.6493	0.26558	9.82897	0.107311	9.55628	0.0760582	10.1933	0.714043		1619.72	110.915	1518.33	132.982	1754.24	174.878	1481.65	146.153	13.4484	1754.24	174.878
061814-01_283	Price Canyon	Blackhawk Fm.	4.25393	13.2149	0.287339	9.01622	0.10738	9.61007	0.0777481	10.6022	0.686424		1684.5	109.06	1628.22	129.749	1755.42	175.837	1513.36	155.184	7.24602	1755.42	175.837
061814-01_73	Price Canyon	Blackhawk Fm.	4.42775	12.4665	0.298573	8.99344	0.107534	8.60215	0.0791471	8.92441	0.723795		1717.54	103.62	1684.23	133.318	1758.04	157.344	1539.59	132.731	4.19856	1758.04	157.344
061814-01_162	Price Canyon	Blackhawk Fm.	4.22135	13.4015	0.284502	9.60984	0.107659	9.3049	0.083982	7.69521	0.719674		1678.18	110.449	1613.99	137.23	1760.17	170.154	1629.94	120.864	8.30466	1760.17	170.154
061814-01_229	Price Canyon	Blackhawk Fm.	3.73634	14.3157	0.25134	10.2788	0.107821	9.92415	0.079199	10.8174	0.720717		1579.19	115.16	1445.39	133.11	1762.92	181.417	1540.56	161.096	18.0121	1762.92	181.417
061814-01_175	Price Canyon	Blackhawk Fm.	4.21877	12.1369	0.282658	8.69952	0.108216	8.42632	0.0825368	9.23228	0.719716		1677.68	99.9432	1604.73	123.6	1769.6	153.91	1602.97	142.778	9.31668	1769.6	153.91
061814-01_86	Price Canyon	Blackhawk Fm.	3.93959	17.0725	0.263204	11.3142	0.108534	12.7527	0.145572	45.1573	0.664855		1621.85	139.121	1506.21	151.999	1774.96	232.782	2746.92	1194.44	15.1409	1774.96	232.782
061814-01_236	Price Canyon	Blackhawk Fm.	4.08771	14.3463	0.272482	10.2316	0.108806	10.0182	0.0872746	9.99537	0.715803		1651.85	117.561	1553.39	141.259	1779.53	182.765	1691.24	162.821	12.7078	1779.53	182.765
061814-01_240	Price Canyon	Blackhawk Fm.	4.51194	14.9505	0.300321	10.5524	0.108965	10.5568	0.0838147	11.2954	0.708099		1733.17	124.89	1692.9	157.141	1782.19	192.53	1626.82	177.331	5.00997	1782.19	192.53
061814-01_93	Price Canyon	Blackhawk Fm.	4.65063	10.7408	0.308688	7.8056	0.109297	7.32995	0.088595	8.78275	0.730951		1758.41	89.9942	1734.25	118.702	1787.73	133.59	1715.77	144.992	2.99137	1787.73	133.59
061814-01_124	Price Canyon	Blackhawk Fm.	4.87298	12.198	0.322518	8.96825	0.109606	8.21285	0.0855091	10.8525	0.739388		1797.6	103.121	1802.01	141.009	1792.86	149.587	1658.39	173.535	-0.510326	1792.86	149.587
061814-01_23	Price Canyon	Blackhawk Fm.	4.41908	11.4192	0.290875	8.38442	0.110224	7.66457	0.0892918	8.06057	0.741308		1715.92	94.8267	1645.9	121.805	1803.1	139.428	1728.71	133.994	8.71835	1803.1	139.428
061814-01_156	Price Canyon	Blackhawk Fm.	4.33235	11.9846	0.285036	8.72581	0.110227	8.16125	0.0844853	8.1777	0.732317		1699.54	99.183	1616.68	124.785	1803.15	148.463	1639.32	129.178	10.3415	1803.15	148.463
061814-01_17	Price Canyon	Blackhawk Fm.	4.27987	19.5495	0.281116	13.9055	0.110433	13.7132	0.0876571	25.1747	0.712707		1689.5	162.274	1596.98	196.76	1806.55	249.293	1698.35	414.302	11.6009	1806.55	249.293
061814-01_282	Price Canyon	Blackhawk Fm.	4.25878	17.4789	0.27877	14.7525	0.110799	9.32344	0.074904	17.6646	0.845857		1685.43	144.7	1585.17	207.39	1812.55	169.374	1459.96	250.345	12.5451	1812.55	169.374
061814-01_201	Price Canyon	Blackhawk Fm.	4.82553	12.4767	0.314591	8.97931	0.111254	8.61673	0.0847464	9.56969	0.723221		1789.36	105.316	1763.26	138.543	1820.01	156.402	1644.19	151.682	3.11817	1820.01	156.402
061814-01_54	Price Canyon	Blackhawk Fm.	4.75715	15.6454	0.30884	10.5863	0.111745	11.4837	0.0915989	12.2172	0.679161		1777.37	132.006	1735	161.064	1827.99	208.249	1771.47	208.281	5.08729	1827.99	208.249
061814-01_61	Price Canyon	Blackhawk Fm.	4.71948	12.2453	0.305993	8.68491	0.111796	8.60335	0.0756603	8.7552	0.711602		1770.7	102.948	1720.96	131.194	1828.82	156.001	1474.17	124.857	5.89785	1828.82	156.001
061814-01_281	Price Canyon	Blackhawk Fm.	5.17148	13.0718	0.333337	9.03518	0.112511	9.39843	0.0958948	9.34211	0.695036		1847.93	111.67	1854.54	145.637	1840.37	170.194	1850.86	165.908	-0.769546	1840.37	170.194
061814-01_112	Price Canyon	Blackhawk Fm.	5.39681	12.3726	0.340625	8.80753	0.114938	8.64765	0.0963785	10.0285	0.715193		1884.35	106.378	1889.68	144.283	1878.91	155.814	1859.78	178.974	-0.572818	1878.91	155.814
061814-01_87	Price Canyon	Blackhawk Fm.	4.73993	10.5301	0.298762	7.41194	0.115042	7.42408	0.0798458	8.7709	0.709195		1774.33	88.5171	1685.17	109.923	1880.54	133.742	1552.67	131.511	10.3891	1880.54	133.742
061814-01_212	Price Canyon	Blackhawk Fm.	5.48128	10.7614	0.345353	7.97923	0.115133	7.16704	0.096806	8.66023	0.74597		1897.67	92.6666	1912.37	132.059	1881.96	129.09	1867.66	155.089	-1.61552	1881.96	129.09
061814-01_244	Price Canyon	Blackhawk Fm.	5.0869	14.7786	0.312615	10.7709	0.118014	10.0852	0.0899446	12.0192	0.730967		1833.92	126.05	1753.56	165.401	1926.37	180.721	1740.82	201.476	8.97093	1926.37	180.721
061814-01_250	Price Canyon	Blackhawk Fm.	5.10361	13.2171	0.306798	9.43909	0.120638	9.21361	0.0812812	11.6062	0.716982		1836.71	112.677	1724.93	142.878	1965.68	164.363	1579.52	177.116	12.2476	1965.68	164.363
061814-01_84	Price Canyon	Blackhawk Fm.	5.65523	10.3248	0.335634	7.25901	0.122178	7.28601	0.104169	16.7573	0.708553		1924.56	89.3137	1865.63	117.604	1988.27	129.634	2002.88	322.088	6.16812	1988.27	129.634
061814-01_132	Price Canyon	Blackhawk Fm.	5.37887	12.076	0.317223	8.91774	0.123008	8.09288	0.098867	8.35003	0.742223		1881.5	103.755	1776.16	138.467	2000.31	143.785	1905.6	152.421	11.2059	2000.31	143.785
061814-01_152	Price Canyon	Blackhawk Fm.	4.96891	19.4563	0.292145	16.4618	0.12334	10.3267	0.0666734	17.2786	0.847521		1814.05	165.92	1652.24	240.04	2005.1	183.369	1304.6	219.483	17.5981	2005.1	183.369
061814-01_160	Price Canyon	Blackhawk Fm.	5.39846	13.002	0.304729	9.54142	0.128497	8.78754	0.101083	9.46992	0.737036		1884.61	111.837	1714.72	143.68	2077.51	154.723	1946.32	176.487	17.4629	2077.51	154.723
061814-01_167	Price Canyon	Blackhawk Fm.	6.27826	15.382	0.350843	11.2604	0.129804	10.4437	0.0961111	11.8391	0.734181		2015.43	135.526	1938.62	188.584	2095.31	183.507	1854.85	210.919	7.47804	2095.31	183.507
061814-01_180	Price Canyon	Blackhawk Fm.	6.89315	13.293	0.376815	9.22742	0.132673	9.54319	0.109107	18.8249	0.696137		2097.78	118.408	2061.39	162.833	2133.65	166.949	2093.08	377.813	3.38664	2133.65	166.949
061814-01_228	Price Canyon	Blackhawk Fm.	7.3562	14.3278	0.378886	10.0922	0.140822	10.1314	0.11355	8.89553	0.707104		2155.66	128.758	2071.08	178.811	2237.34	175.26	2173.88	184.179	7.43118	2237.34	175.26
061814-01_122	Price Canyon	Blackhawk Fm.	8.72608	13.8669	0.400259	11.2066	0.158144	8.11295	0.0848981	17.7374	0.810997		2309.8	126.983	2170.23	206.574	2435.91	137.458	1647.01	282.517	10.9068	2435.91	137.458
061814-01_270	Price Canyon	Blackhawk Fm.	11.2798	12.8114	0.489737	9.36535	0.167096	8.6962	0.131609	9.03077	0.734343		2546.53	120.047	2569.54	198.533	2528.76	145.956	2499.06	213.413	-1.61247	2528.76	145.956
061814-01_53	Price Canyon	Blackhawk Fm.	11.3284	13.7383	0.473564	9.55113	0.173554	9.83046	0.131459	10.5959	0.698566		2550.54	128.869	2499.17	197.933	2592.22	163.964	2496.38	250.376	3.5894	2592.22	163.964
061814-01_251	Price Canyon	Blackhawk Fm.	11.8533	13.737	0.489726	9.66673	0.175517	9.72246	0.13602	22.4326	0.706462		2592.88	129.326	2569.49	204.923	2610.96	161.867	2577.68	550.312	1.58818	2610.96	161.867
061814-01_109	Price Canyon	Blackhawk Fm.	12.1387	12.1226	0.485435	9.15158	0.181431	7.90656	0.134326	19.2983	0.75804		2615.18	114.202	2550.9	192.851	2665.99	130.943	2547.51	467.267	4.3172	2665.99	130.943
061814-01_221	Price Canyon	Blackhawk Fm.	12.7325	14.6831	0.492694	11.127	0.187455	9.54231	0.123179	9.92818	0.760036		2660.07	139.096	2582.32	236.863	2719.96	157.237	2347.91	221.282	5.06049	2719.96	157.237
061814-01_263	Price Canyon	Blackhawk Fm.	13.4362	12.9428	0.51378	9.06123	0.189695	9.20546	0.139348	10.1966	0.702955		2710.81	122.913	2672.75	198.315	2739.52	151.414	2636.8	253.651	2.43737	2739.52	151.414
061814-01_187	Price Canyon	Blackhawk Fm.	12.5748	21.6408	0.480085	15.9972	0.190302	14.5661	0.130422	13.3783	0.739568		2648.34	206.345	2527.64	334.799	2744.77	239.471	2477.84	314.413	7.91081	2744.77	239.471
061814-01_100	Price Canyon	Blackhawk Fm.	14.4524	11.6009	0.545463	8.36095	0.192252	8.00363	0.151156	10.275	0.723897		2779.88	110.606	2806.28	190.286	2761.53	131.382	2845.21	274.558	-1.62046	2761.53	131.382
150413-01_38	Price Canyon	Blackhawk Fm.	0.241853	50.6079	0.0383179	8.33446	0.0457771	49.9169			0.164687		219.937	100.157	242.398	19.8275	0.0	1222.71			-10.2126	242.398	19.8275
150413-01_76	Price Canyon	Blackhawk Fm.	0.307336	3.83692	0.0432054	2.69549	0.051591	2.73062			0.702515		272.114	9.15886	272.671	7.19655	267.336	62.6354			-0.204733	272.671	7.19655
150413-01_32	Price Canyon	Blackhawk Fm.	0.371725	31.9342	0.0521694	13.9664	0.0516779	28.7182			0.437348		320.931	87.925	327.827	44.641	271.161	661.283			-2.14861	327.827	44.641
150413-01_45	Price Canyon	Blackhawk Fm.	0.432676	7.49856	0.0583924	4.23498	0.053741	6.18816			0.564772		365.075	22.9954	365.841	15.0619	360.189	139.655			-0.209907	365.841	15.0619
150413-01_101	Price Canyon	Blackhawk Fm.	0.449316	9.27467	0.0591372	3.09684	0.0551049	8.74237			0.333903		376.8	29.1976	370.376	11.1467	416.461	195.358			1.70496	370.376	11.1467
150413-01_99	Price Canyon	Blackhawk Fm.	0.472126	4.43085	0.0622804	3.44191	0.05498	2.79028			0.776805		392.656	14.429	389.479	13.0086	411.39	62.397			0.80914	389.479	13.0086
150413-01_13	Price Canyon	Blackhawk Fm.	0.474869	7.33718	0.0630874	2.96936	0.0545921	6.70948			0.4047		394.546	23.9883	394.374	11.3594	395.536	150.445			0.0436801	394.374	11.3594
150413-01_40	Price Canyon	Blackhawk Fm.	0.493614	3.96028	0.0638526	2.37808	0.0560671	3.16679			0.600483		407.371	13.2896	399.013	9.20115	455.04	70.2921			2.05167	399.013	9.20115
150413-01_82	Price Canyon	Blackhawk Fm.	0.491083	4.30942	0.0649727	3.8733	0.054818	1.8891			0.898798		405.648	14.4115	405.796	15.2332	404.786	42.2923			-0.0364247	405.796	15.2332
150413-01_31	Price Canyon	Blackhawk Fm.	0.518729	55.3175	0.0661126	14.0028	0.0569055	53.5159			0.253136		424.302	192.42	412.693	55.9781	487.854	1200.53			2.73602	412.693	55.9781
150413-01_3	Price Canyon	Blackhawk Fm.	0.466974	98.8091	0.06653	14.3268	0.0509066	97.7649			0.144994		389.097	322.045	415.216	57.6121	236.58	2390.38			-6.71285	415.216	57.6121
150413-01_25	Price Canyon	Blackhawk Fm.	0.509959	18.9131	0.0668368	4.69227	0.0553374	18.3218			0.248096		418.422	64.8801	417.07	18.9504	425.858	409.441			0.322998	417.07	18.9504
150413-01_19	Price Canyon	Blackhawk Fm.	0.534981	6.86684	0.0683193	5.18568	0.0567929	4.50136			0.755177		435.11	24.3021	426.022	21.378	483.522	99.4318			2.08871	426.022	21.378
150413-01_58	Price Canyon	Blackhawk Fm.	0.522622	12.2668	0.0694682	6.0872	0.0545633	10.6498			0.496236		426.901	42.7582	432.951	25.4891	394.348	238.962			-1.41709	432.951	25.4891
150413-01_97	Price Canyon	Blackhawk Fm.	0.625322	6.37268	0.0794152	4.75441	0.0571082	4.24342			0.746061		493.177	24.8965	492.631	22.5492	495.694	93.536			0.110775	492.631	22.5492
150413-01_72	Price Canyon	Blackhawk Fm.	0.649484	15.894	0.0816068	3.98822	0.057722	15.3855			0.250926		508.161	63.566	505.706	19.3979	519.204	338.12			0.483169	505.706	19.3979
150413-01_15	Price Canyon	Blackhawk Fm.	0.651719	8.92396	0.0822863	5.54062	0.0574423	6.99561			0.62087		509.536	35.7566	509.755	27.1558	508.533	153.908			-0.0429863	509.755	27.1558
150413-01_36	Price Canyon	Blackhawk Fm.	0.674164	11.3462	0.084431	4.43127	0.0579111	10.4452			0.390549		523.241	46.4008	522.517	22.2406	526.422	229.159			0.138328	522.517	22.2406
150413-01_26	Price Canyon	Blackhawk Fm.	0.788834	5.74108	0.0958465	4.43563	0.0596909	3.64487			0.772614		590.51	25.7076	590.022	25.0093	592.368	79.0621			0.0827451	590.022	25.0093
150413-01_86	Price Canyon	Blackhawk Fm.	0.782818	8.37877	0.0969267	4.22189	0.0585755	7.23737			0.503879		587.09	37.3605	596.373	24.0487	551.353	158.054			-1.58121	596.373	24.0487
150413-01_94	Price Canyon	Blackhawk Fm.	0.805856	6.54471	0.0969786	4.95985	0.0602671	4.27002			0.757841		600.126	29.6569	596.678	28.2661	613.157	92.2341			0.574663	596.678	28.2661
150413-01_67	Price Canyon	Blackhawk Fm.	0.798167	3.64646	0.0976723	2.3599	0.0592681	2.77985			0.647175		595.794	16.4352	600.753	13.5366	576.978	60.4222			-4.1206	600.753	13.5366
150413-01_87	Price Canyon	Blackhawk Fm.	0.862156	7.9345	0.103012	5.15159	0.0607013	6.03468			0.649264		631.299	37.3051	632.035	31.0146	628.645	130.09			-0.539251	632.035	31.0146
150413-01_2	Price Canyon	Blackhawk Fm.	1.58424	6.59125	0.149797	6.48931	0.0767039	1.15477			0.984533		964.038	41.0342	899.826	54.5006	1113.48	23.0216			19.1881	899.826	54.5006
150413-01_69	Price Canyon	Blackhawk Fm.	1.57475	17.0474	0.156827	6.30629	0.0728267	15.8381			0.369926		960.301	105.964	939.117	55.112	1009.12	321.685			6.93673	939.117	55.112
150413-01_52	Price Canyon	Blackhawk Fm.	1.58693	4.06626	0.161075	3.28504	0.0714545	2.39645			0.807878		965.093	25.3291	962.746	29.3783	970.462	48.8942			0.795111	962.746	29.3783
150413-01_51	Price Canyon	Blackhawk Fm.	1.61523	8.19443	0.163444	4.32964	0.0716743	6.95723			0.528363		976.14	51.4003	975.888	39.2098	976.726	141.871			0.0857973	975.888	39.2098
150413-01_35	Price Canyon	Blackhawk Fm.	1.71684	6.82194	0.16639	6.61816	0.0748344	1.65491			0.97013		1014.84	43.7795	992.19	60.8615	1064.08	33.2478			6.75566	992.19	60.8615
150413-01_107	Price Canyon	Blackhawk Fm.	1.71213	4.43726	0.169197	2.63266	0.0733913	3.57189			0.593308		1013.08	28.4446	1007.68	24.5594	1024.76	72.2936			1.66631	1007.68	24.5594
150413-01_23	Price Canyon	Blackhawk Fm.	1.73375	7.46161	0.16964	4.88213	0.0741237	5.64273			0.6543		1021.15	48.0586	1010.13	45.6463	1044.82	113.859			3.31998	1010.13	45.6463
150413-01_117	Price Canyon	Blackhawk Fm.	1.72825	4.69748	0.16989	2.99692	0.0737799	3.61729			0.637986		1019.1	30.2169	1011.5	28.0554	1035.43	73.1112			2.31111	1011.5	28.0554
150413-01_53	Price Canyon	Blackhawk Fm.	1.72955	3.231	0.170935	3.12785	0.0733842	0.809878			0.968075		1019.58	20.7885	1017.26	29.4349	1024.56	16.3877			0.712736	1017.26	29.4349
150413-01_69	Price Canyon	Blackhawk Fm.	1.57475	17.0474	0.156827	6.30629	0.0728267	15.8381			0.369926		960.301	105.964	939.117	55.112	1009.12	321.685			6.93673	939.117	55.112
150413-01_14	Price Canyon	Blackhawk Fm.	1.74784	7.33176	0.173333	6.44982	0.0731336	3.48633			0.87971		1026.36	47.3616	1030.45	61.4228	1017.64	70.6175			-1.25894	1030.45	61.4228
150413-01_60	Price Canyon	Blackhawk Fm.	1.79716	4.60993	0.173934	3.28717	0.0749381	3.23202			0.713064		1044.43	30.0764	1033.75	31.3965	1066.86	64.9876			3.10385	1033.75	31.3965
150413-01_5	Price Canyon	Blackhawk Fm.	1.79103	6.66994	0.17426	3.18511	0.0745426	5.8603			0.477532		1042.2	43.4667	1035.54	30.4702	1056.21	118.067			1.95753	1035.54	30.4702
150413-01_49	Price Canyon	Blackhawk Fm.	1.77154	5.05729	0.174496	3.33423	0.0736319	3.80252			0.659291		1035.09	32.8258	1036.83	31.9336	1031.38	76.8995			-0.529058	1036.83	31.9336
150413-01_112	Price Canyon	Blackhawk Fm.	1.76849	5.43334	0.175724	3.35973	0.0729912	4.27005			0.618355		1033.97	35.2452	1043.57	32.3705	1013.69	86.5661			-2.94782	1043.57	32.3705
150413-01_50	Price Canyon	Blackhawk Fm.	1.83959	6.65537	0.176199	6.40072	0.0757211	1.82341			0.961737		1059.72	43.786	1046.18	61.812	1087.72	36.5224			3.81975	1046.18	61.812
150413-01_100	Price Canyon	Blackhawk Fm.	1.82117	9.37379	0.176999	4.5921	0.0746242	8.17194			0.489887		1053.11	61.4609	1050.56	44.5169	1058.42	164.582			0.742628	1050.56	44.5169
150413-01_28	Price Canyon	Blackhawk Fm.	1.84382	3.5429	0.177292	3.12271	0.0754272	1.67356			0.8814		1061.22	23.3251	1052.16	30.3148	1079.89	33.5418			2.56774	1052.16	30.3148
150413-01_6	Price Canyon	Blackhawk Fm.	1.83286	6.80043	0.177457	5.07622	0.0749093	4.52525			0.746456		1057.3	44.6828	1053.06	49.3183	1066.09	90.9972			1.22148	1053.06	49.3183
150413-01_56	Price Canyon	Blackhawk Fm.	1.83035	10.7311	0.178412	3.30714	0.0744063	10.2088			0.308182		1056.41	70.4926	1058.29	32.2773	1052.53	205.81			-0.547465	1058.29	32.2773
150413-01_96	Price Canyon	Blackhawk Fm.	1.91643	10.4622	0.182225	3.91727	0.0762754	9.70115			0.374422		1086.82	69.8336	1079.12	38.9233	1102.33	194.138			2.10551	1079.12	38.9233
150413-01_29	Price Canyon	Blackhawk Fm.	1.9563	6.88049	0.182889	6.48572	0.0775794	2.29707			0.942625		1100.61	46.2392	1082.74	64.6432	1136.14	45.7081			4.70039	1082.74	64.6432
150413-01_106	Price Canyon	Blackhawk Fm.	1.92719	10.3181	0.183014	4.20009	0.0763727	9.42461			0.407059		1090.56	69.0036	1083.42	41.8864	1104.84	188.539			1.93853	1083.42	41.8864
150413-01_63	Price Canyon	Blackhawk Fm.	2.02759	4.22976	0.18909	3.06293	0.0777698	2.91707			0.724139		1124.81	28.7645	1116.44	31.3986	1141.02	58.0048			2.15355	1116.44	31.3986
150413-01_73	Price Canyon	Blackhawk Fm.	2.03155	5.7875	0.190267	4.22067	0.0774397	3.95994			0.729273		1126.14	39.3857	1122.82	43.493	1132.55	78.8453			0.859337	1122.82	43.493
150413-01_104	Price Canyon	Blackhawk Fm.	2.11515	2.98155	0.194547	2.76922	0.0788526	1.10503			0.928784		1153.76	20.5565	1145.96	29.0735	1168.42	21.9216			1.92237	1145.96	29.0735
150413-01_110	Price Canyon	Blackhawk Fm.	2.17594	3.73343	0.196459	3.3954	0.0803291	1.55235			0.909458		1173.38	25.9739	1156.27	35.9406	1205.06	30.5429			4.04862	1156.27	35.9406
150413-01_27	Price Canyon	Blackhawk Fm.	2.14412	3.38518	0.197256	3.23858	0.0788347	0.985426			0.956693		1163.16	23.4412	1160.56	34.3967	1167.97	19.5539			0.634278	1160.56	34.3967
150413-01_79	Price Canyon	Blackhawk Fm.	2.12796	3.46896	0.197293	2.74381	0.0782259	2.12254			0.79096		1157.92	23.9636	1160.76	29.1463	1152.6	42.1526			-0.70834	1160.76	29.1463
150413-01_75	Price Canyon	Blackhawk Fm.	2.1043	8.52113	0.198065	4.63642	0.0770547	7.14935			0.544109		1150.21	58.6667	1164.92	49.4118	1122.6	142.567			-3.76987	1164.92	49.4118
150413-01_78	Price Canyon	Blackhawk Fm.	2.17603	3.85761	0.201469	3.30733	0.0783346	1.98563			0.857352		1173.41	26.8382	1183.21	35.7514	1155.35	39.438			-2.41096	1183.21	35.7514
150413-01_57	Price Canyon	Blackhawk Fm.	2.40142	8.85099	0.211123	8.66757	0.0824956	1.79253			0.979277		1243.02	63.4703	1234.8	97.4028	1257.33	35.0478			1.79178	1257.33	35.0478
150413-01_66	Price Canyon	Blackhawk Fm.	2.52579	3.25991	0.216556	2.12735	0.0845915	2.4701			0.652578		1279.49	23.7135	1263.65	24.4115	1306.17	47.9651			3.25558	1306.17	47.9651
150413-01_55	Price Canyon	Blackhawk Fm.	2.59111	4.30105	0.221956	3.99256	0.0846677	1.59952			0.928277		1298.13	31.5135	1292.2	46.7502	1307.92	31.049			1.20175	1307.92	31.049
150413-01_111	Price Canyon	Blackhawk Fm.	2.71146	13.6301	0.23058	7.8344	0.0852866	11.1536			0.574786		1331.6	101.192	1337.54	94.6331	1322.04	216.213			-1.1718	1322.04	216.213
150413-01_113	Price Canyon	Blackhawk Fm.	2.71584	4.01354	0.229776	2.96447	0.0857233	2.70562			0.738618		1332.8	29.7876	1333.32	35.7063	1331.93	52.3461			-0.104344	1331.93	52.3461
150413-01_102	Price Canyon	Blackhawk Fm.	2.72273	5.37841	0.23033	4.96083	0.085734	2.07785			0.92236		1334.68	39.9469	1336.23	59.8693	1332.17	40.1986			-0.304334	1332.17	40.1986
150413-01_109	Price Canyon	Blackhawk Fm.	2.81318	7.06904	0.233955	3.14655	0.0872094	6.33013			0.445117		1359.05	52.9662	1355.19	38.4581	1365.11	121.931			0.726047	1365.11	121.931
150413-01_8	Price Canyon	Blackhawk Fm.	2.76734	4.55052	0.229148	3.77571	0.0875882	2.53992			0.829732		1346.77	33.9437	1330.03	45.3765	1373.45	48.8572			3.16122	1373.45	48.8572
150413-01_74	Price Canyon	Blackhawk Fm.	2.83056	5.48072	0.233883	5.25463	0.087775	1.55792			0.958749		1363.67	41.1279	1354.82	64.208	1377.55	29.9514			1.64986	1377.55	29.9514
150413-01_103	Price Canyon	Blackhawk Fm.	2.88042	3.69884	0.23685	3.42884	0.0882024	1.38725			0.927005		1376.8	27.8804	1370.3	42.3276	1386.88	26.6336			1.19543	1386.88	26.6336
150413-01_30	Price Canyon	Blackhawk Fm.	2.9434	5.39971	0.240329	4.24954	0.0888264	3.33142			0.786993		1393.15	40.9296	1388.4	53.08	1400.4	63.8453			0.856683	1400.4	63.8453
150413-01_89	Price Canyon	Blackhawk Fm.	3.09088	7.70096	0.24912	6.3011	0.0899855	4.4273			0.818222		1430.43	59.0966	1433.93	81.011	1425.2	84.5664			-0.612561	1425.2	84.5664
150413-01_39	Price Canyon	Blackhawk Fm.	3.14882	2.63893	0.248302	2.55894	0.0919743	0.644821			0.969687		1444.71	20.3374	1429.71	32.8125	1466.84	12.2464			2.5309	1466.84	12.2464
150413-01_21	Price Canyon	Blackhawk Fm.	3.33648	4.67461	0.261928	4.58503	0.0923856	0.910751			0.980837		1489.63	36.5236	1499.7	61.3496	1475.31	17.2773			-1.65346	1475.31	17.2773
150413-01_85	Price Canyon	Blackhawk Fm.	3.1902	5.82976	0.247764	5.73676	0.0933853	1.03717			0.984047		1454.79	45.0749	1426.93	73.4337	1495.7	19.622			4.59726	1495.7	19.622
150413-01_18	Price Canyon	Blackhawk Fm.	3.4278	4.0847	0.266004	3.77484	0.09346	1.56058			0.92414		1510.79	32.111	1520.49	51.1295	1497.21	29.5185			-1.55471	1497.21	29.5185
150413-01_4	Price Canyon	Blackhawk Fm.	3.33234	5.2777	0.257165	4.40029	0.0939803	2.91403			0.833752		1488.66	41.225	1475.32	58.0258	1507.7	55.041			2.14782	1507.7	55.041
150413-01_20	Price Canyon	Blackhawk Fm.	3.3355	3.18413	0.257036	3.11602	0.0941163	0.655048			0.97861		1489.4	24.875	1474.66	41.0739	1510.43	12.3683			2.36833	1510.43	12.3683
150413-01_98	Price Canyon	Blackhawk Fm.	3.54677	5.37318	0.267639	3.41263	0.0961131	4.1503			0.635123		1537.71	42.5652	1528.81	46.4475	1549.97	77.9574			1.36523	1549.97	77.9574
150413-01_93	Price Canyon	Blackhawk Fm.	3.81174	4.06014	0.281594	4.02697	0.0981746	0.517874			0.991832		1595.23	32.661	1599.38	57.0391	1589.72	9.6768			-0.607793	1589.72	9.6768
150413-01_114	Price Canyon	Blackhawk Fm.	3.83445	6.39621	0.282607	5.70118	0.0984052	2.89966			0.891337		1600.01	51.5231	1604.48	80.9801	1594.1	54.1473			-0.650914	1594.1	54.1473
150413-01_95	Price Canyon	Blackhawk Fm.	4.0136	5.78767	0.290882	5.12491	0.100073	2.68932			0.885487		1636.95	47.054	1645.94	74.4458	1625.42	50.0186			-1.26257	1625.42	50.0186
150413-01_12	Price Canyon	Blackhawk Fm.	4.00339	3.92674	0.287525	3.76121	0.100984	1.12807			0.957847		1634.88	31.9052	1629.15	54.1463	1642.25	20.9361			0.798047	1642.25	20.9361
150413-01_119	Price Canyon	Blackhawk Fm.	3.78805	3.04281	0.272039	2.69624	0.100991	1.4103			0.886103		1590.21	24.4446	1551.14	37.1714	1642.39	26.1738			5.55554	1642.39	26.1738
150413-01_61	Price Canyon	Blackhawk Fm.	4.09432	4.67513	0.293707	4.48806	0.101104	1.30924			0.959987		1653.17	38.1566	1660.03	65.6839	1644.45	24.2917			-0.946936	1644.45	24.2917
150413-01_22	Price Canyon	Blackhawk Fm.	4.02778	3.62171	0.288129	3.09614	0.101386	1.87901			0.854884		1639.82	29.4621	1632.17	44.6446	1649.62	34.8372			1.05784	1649.62	34.8372
150413-01_105	Price Canyon	Blackhawk Fm.	3.91111	1.80027	0.279662	1.15019	0.10143	1.38493			0.638901		1615.98	14.5578	1589.66	16.2042	1650.43	25.6729			3.68214	1650.43	25.6729
150413-01_108	Price Canyon	Blackhawk Fm.	3.86525	5.35039	0.275741	4.40262	0.101666	3.04034			0.822859		1606.46	43.1672	1569.88	61.344	1654.74	56.3357			5.12808	1654.74	56.3357
150413-01_80	Price Canyon	Blackhawk Fm.	4.09269	5.71225	0.29144	4.23437	0.101849	3.83405			0.741279		1652.85	46.6203	1648.72	61.6007	1658.08	71.0156			0.5644	1658.08	71.0156
150413-01_17	Price Canyon	Blackhawk Fm.	4.19275	4.80599	0.29407	3.86757	0.103406	2.85297			0.80474		1672.6	39.4066	1661.84	56.6568	1686.13	52.6488			1.44066	1686.13	52.6488
150413-01_33	Price Canyon	Blackhawk Fm.	4.29323	3.88346	0.30064	2.48153	0.10357	2.98719			0.638998		1692.06	31.9851	1694.48	36.9767	1689.05	55.106			-0.321764	1689.05	55.106
150413-01_64	Price Canyon	Blackhawk Fm.	4.4493	3.0014	0.303664	2.47964	0.106267	1.6911			0.826159		1721.57	24.8844	1709.45	37.2336	1736.32	31.0104			1.54736	1736.32	31.0104
150413-01_10	Price Canyon	Blackhawk Fm.	4.5487	4.08479	0.308734	3.42869	0.106857	2.22026			0.839381		1739.92	34.0045	1734.47	52.1414	1746.46	40.664			0.686339	1746.46	40.664
150413-01_46	Price Canyon	Blackhawk Fm.	3.80173	4.42797	0.257891	4.25652	0.106916	1.22024			0.96128		1593.11	35.601	1479.04	56.2559	1747.49	22.3437			15.3618	1747.49	22.3437
150413-01_84	Price Canyon	Blackhawk Fm.	4.47352	7.98782	0.303359	6.15342	0.106952	5.09319			0.770351		1726.07	66.3124	1707.94	92.3284	1748.1	93.2726			2.29728	1748.1	93.2726
150413-01_24	Price Canyon	Blackhawk Fm.	4.60799	3.9739	0.311383	3.05788	0.107329	2.53796			0.769491		1750.71	33.1581	1747.51	46.8064	1754.53	46.4369			0.40016	1754.53	46.4369
150413-01_43	Price Canyon	Blackhawk Fm.	4.73889	3.1515	0.318355	3.11286	0.10796	0.492016			0.987738		1774.14	26.4253	1781.69	48.4572	1765.26	8.99072			-0.930803	1765.26	8.99072
150413-01_44	Price Canyon	Blackhawk Fm.	5.16244	3.76883	0.332712	2.61366	0.112535	2.7153			0.693495		1846.45	32.0609	1851.51	42.0631	1840.73	49.1548			-0.585784	1840.73	49.1548
150413-01_77	Price Canyon	Blackhawk Fm.	5.25859	3.10162	0.337946	3.0473	0.112855	0.57796			0.982485		1862.17	26.4628	1876.78	49.6185	1845.88	10.4573			-1.67417	1845.88	10.4573
150413-01_91	Price Canyon	Blackhawk Fm.	4.88184	4.24444	0.304227	4.22318	0.116382	0.424315			0.99499		1799.13	35.7739	1712.24	63.5047	1901.36	7.62634			9.9465	1901.36	7.62634
150413-01_65	Price Canyon	Blackhawk Fm.	5.51332	2.27376	0.338279	2.16734	0.118205	0.687461			0.953198		1902.67	19.5433	1878.39	35.3163	1929.25	12.3111			2.63643	1929.25	12.3111
150413-01_7	Price Canyon	Blackhawk Fm.	5.22602	9.81027	0.318975	9.61514	0.118827	1.94693			0.980109		1856.87	83.6599	1784.72	149.904	1938.64	34.835			7.93961	1938.64	34.835
150413-01_16	Price Canyon	Blackhawk Fm.	5.55702	5.39751	0.316416	5.29919	0.127374	1.02553			0.981784		1909.46	46.4552	1772.2	82.1104	2062.03	18.0902			14.0557	2062.03	18.0902
150413-01_59	Price Canyon	Blackhawk Fm.	6.50923	5.13977	0.36822	5.08572	0.12821	0.743472			0.989483		2047.15	45.246	2021.02	88.2325	2073.56	13.0932			2.53376	2073.56	13.0932
150413-01_42	Price Canyon	Blackhawk Fm.	11.0324	9.42365	0.457648	9.28141	0.174838	1.6311			0.984907		2525.87	87.7884	2429.16	187.863	2604.49	27.1748			6.73166	2604.49	27.1748
150413-01_37	Price Canyon	Blackhawk Fm.	12.1411	4.70163	0.485847	4.55289	0.181242	1.17324			0.968365		2615.37	44.1137	2552.68	95.9708	2664.25	19.4396			4.18762	2664.25	19.4396
150413-01_81	Price Canyon	Blackhawk Fm.	13.8614	5.51121	0.534626	5.32916	0.188042	1.40482			0.966967		2740.28	52.2059	2760.91	119.684	2725.1	23.1371			-1.31406	2725.1	23.1371
150413-01_120	Price Canyon	Blackhawk Fm.	12.6135	5.66317	0.48365	5.55448	0.189149	1.10421			0.980807		2651.23	53.2912	2543.15	116.728	2734.77	18.1686			7.00681	2734.77	18.1686
150413-01_62	Price Canyon	Blackhawk Fm.	14.4469	2.39434	0.535845	2.26556	0.19554	0.774674			0.946213		2779.52	22.7388	2766.03	50.9551	2789.31	12.6808			0.834613	2789.31	12.6808
150413-01_118	Price Canyon	Blackhawk Fm.	14.9903	4.21274	0.555504	3.71059	0.195714	1.99466			0.880803		2814.62	40.1056	2848.02	85.4248	2790.77	32.658			-2.05156	2790.77	32.658
150413-01_90	Price Canyon	Blackhawk Fm.	15.7407	4.39094	0.518431	4.32727	0.220207	0.745029			0.9855		2861.19	41.9275	2692.52	95.2437	2982.2	11.9876			9.71334	2982.2	11.9876
150413-01_47	Price Canyon	Blackhawk Fm.	19.103	6.25059	0.610165	6.21471	0.227067	0.66878			0.99426		3047.03	60.3281	3070.66	151.822	3031.48	10.7233			-1.2926	3031.48	10.7233
160413-02-69	Horse Canyon	Price River Fm.	0.079673	23.8758	0.0124122	4.76044	0.0465545	23.3965			0.199383		77.8375	17.8903	79.5215	3.76232	26.4198	562.716			-2.16357	79.5215	3.76232
160413-02-1	Horse Canyon	Price River Fm.	0.0743602	34.8792	0.0135659	6.82926	0.039755	34.2041			0.195797		72.8287	24.5137	86.8634	5.89234	0.0	891.323			-19.2709	86.8634	5.89234
160413-02-90	Horse Canyon	Price River Fm.	0.0954415	10.0162	0.0137544	2.3116	0.0503264	9.74581			0.230786		92.5598	8.86102	88.062	2.0218	210.119	225.985			4.8593	88.062	2.0218
160413-02-12	Horse Canyon	Price River Fm.	0.0880541	11.9206	0.0138974	4.97141	0.0459532	10.8345			0.417043		85.689	9.79561	88.9714	4.39275	0.0	261.559			-3.83058	88.9714	4.39275
160413-02-20	Horse Canyon	Price River Fm.	0.0937886	52.4828	0.0142471	11.0207	0.0477445	51.3126			0.209988		91.0265	45.7022	91.1945	9.97955	86.6499	1234.39			-0.184475	91.1945	9.97955
160413-02-113	Horse Canyon	Price River Fm.	0.0875813	27.6866	0.0143722	5.3394	0.0441963	27.1669			0.192851		85.2478	22.6396	91.9899	4.87683	0.0	670.045			-7.90887	91.9899	4.87683
160413-02-86	Horse Canyon	Price River Fm.	0.0860698	193.613	0.014468	14.3105	0.043146	193.084			0.0739128		83.8356	156.104	92.5985	13.1566	0.0	2246.19			-10.4525	92.5985	13.1566
160413-02-14	Horse Canyon	Price River Fm.	0.0970513	49.5555	0.0145095	6.94667	0.048512	49.0662			0.14018		94.0508	44.5211	92.8619	6.40457	124.288	1170.68			1.2641	92.8619	6.40457
160413-02-7	Horse Canyon	Price River Fm.	0.0945934	44.0975	0.0145575	9.41695	0.0471274	43.0803			0.213549		91.7733	38.6994	93.1669	8.71039	55.698	1037.82			-1.51852	93.1669	8.71039
160413-02-105	Horse Canyon	Price River Fm.	0.0928274	46.2102	0.0146563	12.5738	0.0459359	44.4666			0.272101		90.1338	39.861	93.7946	11.7082	0.0	1084.41			-4.06155	93.7946	11.7082
160413-02-84	Horse Canyon	Price River Fm.	0.068379	116.561	0.0148785	12.5789	0.0333321	115.881			0.107917		67.16	75.7851	95.2063	11.8879	0.0	3584.7			-41.7603	95.2063	11.8879
160413-02-21	Horse Canyon	Price River Fm.	0.0949638	20.7477	0.0150438	5.30456	0.0457824	20.0581			0.25567		92.1168	18.2713	96.2566	5.06805	0.0	485.784			-4.49398	96.2566	5.06805
160413-02-16	Horse Canyon	Price River Fm.	0.107282	14.9504	0.0154239	4.28545	0.0504465	14.323			0.286645		103.476	14.7081	98.6698	4.19625	215.607	332.012			4.64472	98.6698	4.19625
160413-02-82	Horse Canyon	Price River Fm.	0.105426	18.3241	0.0155348	2.75243	0.04922	18.1162			0.150208		101.773	17.7452	99.3739	2.71422	158.341	424.633			2.35712	99.3739	2.71422
160413-02-75	Horse Canyon	Price River Fm.	0.110536	5.05151	0.0168757	1.59637	0.0475052	4.79263			0.316019		106.456	5.10534	107.88	1.70784	74.6781	113.931			-1.33786	107.88	1.70784
160413-02-26	Horse Canyon	Price River Fm.	0.110782	10.8421	0.0170649	2.98217	0.0470833	10.4239			0.275055		106.681	10.9796	109.079	3.22555	53.4757	248.83			-2.2481	109.079	3.22555
160413-02-89	Horse Canyon	Price River Fm.	0.156551	12.5629	0.0229378	10.68	0.0494996	6.6155			0.85012		147.679	17.2672	146.196	15.4381	171.542	154.483			1.0043	146.196	15.4381
160413-02-42	Horse Canyon	Price River Fm.	0.135371	292.95	0.0232999	14.6092	0.0421378	292.586			0.0498691		128.913	358.334	148.477	21.4435	0.0	0			-15.1767	148.477	21.4435
160413-02-2	Horse Canyon	Price River Fm.	0.159295	37.9334	0.0246516	5.28476	0.0468656	37.5634			0.139317		150.085	52.9367	156.987	8.1962	42.3839	904.964			-4.59865	156.987	8.1962
160413-02-87	Horse Canyon	Price River Fm.	0.179966	21.3834	0.0246873	4.10637	0.0528708	20.9854			0.192036		168.031	33.1181	157.212	6.37762	323.262	477.792			6.43898	157.212	6.37762
160413-02-97	Horse Canyon	Price River Fm.	0.156796	30.5784	0.0247387	2.91516	0.045968	30.4391			0.095334		147.894	42.0906	157.535	4.53675	0.0	737.839			-6.51879	157.535	4.53675
160413-02-68	Horse Canyon	Price River Fm.	0.179983	27.7929	0.0251939	7.00134	0.0518124	26.8966			0.251911		168.046	43.0512	160.398	11.0915	277.162	618.369			4.5508	160.398	11.0915
160413-02-22	Horse Canyon	Price River Fm.	0.169359	23.6724	0.0252539	7.2711	0.0486383	22.528			0.307156		158.863	34.8157	160.776	11.5456	130.448	531.291			-1.20426	160.776	11.5456
160413-02-51	Horse Canyon	Price River Fm.	0.172461	3.45628	0.0252582	1.89214	0.0495209	2.89235			0.547451		161.553	5.16218	160.802	3.00498	172.545	67.5095			0.464557	160.802	3.00498
160413-02-59	Horse Canyon	Price River Fm.	0.16375	48.9386	0.0252632	5.41322	0.04701	48.6383			0.110612		153.98	69.9479	160.834	8.5986	49.7598	1176.34			-4.45121	160.834	8.5986
160413-02-93	Horse Canyon	Price River Fm.	0.170323	16.9267	0.0254657	6.13882	0.0485084	15.7743			0.362671		159.7	25.0145	162.107	9.82739	124.113	371.915			-1.50767	162.107	9.82739
160413-02-94	Horse Canyon	Price River Fm.	0.162674	31.0728	0.0256278	3.05609	0.0460369	30.9222			0.0983525		153.041	44.1509	163.126	4.92272	0.0	749.156			-6.58948	163.126	4.92272
160413-02-109	Horse Canyon	Price River Fm.	0.16545	24.1932	0.0256734	11.8893	0.0467393	21.0703			0.49143		155.463	34.877	163.413	19.1844	35.9033	505.591			-5.11376	163.413	19.1844
160413-02-81	Horse Canyon	Price River Fm.	0.201728	33.8227	0.0257472	9.8571	0.0568243	32.3545			0.291434		186.587	57.6653	163.876	15.9499	484.743	718.55			12.1716	163.876	15.9499
160413-02-24	Horse Canyon	Price River Fm.	0.176889	12.2124	0.0258209	4.98365	0.0496854	11.1493			0.408082		165.38	18.6384	164.339	8.08659	180.279	260.051			0.629276	164.339	8.08659
160413-02-45	Horse Canyon	Price River Fm.	0.191804	8.01357	0.0259016	4.93303	0.053707	6.31526			0.615585		178.167	13.0953	164.846	8.02883	358.761	142.541			7.47672	164.846	8.02883
160413-02-67	Horse Canyon	Price River Fm.	0.156895	52.7083	0.0259166	8.9827	0.0439066	51.9372			0.170423		147.982	72.6121	164.941	14.6282	0.0	1298.6			-11.4603	164.941	14.6282
160413-02-112	Horse Canyon	Price River Fm.	0.177111	12.4191	0.0259521	3.17499	0.0494964	12.0063			0.255655		165.572	18.9741	165.164	5.17733	171.389	280.544			0.24656	165.164	5.17733
160413-02-116	Horse Canyon	Price River Fm.	0.144073	52.9902	0.0259541	7.16487	0.0402602	52.5036			0.135211		136.665	67.7823	165.177	11.6844	0.0	1370.65			-20.862	165.177	11.6844
160413-02-29	Horse Canyon	Price River Fm.	0.186999	18.6182	0.0259968	5.64314	0.0521696	17.7423			0.303099		174.065	29.7842	165.445	9.21751	292.86	405.896			4.95228	165.445	9.21751
160413-02-103	Horse Canyon	Price River Fm.	0.176374	12.0814	0.0260205	2.74552	0.0491606	11.7653			0.227251		164.935	18.3929	165.594	4.48851	155.495	275.643			-0.399163	165.594	4.48851
160413-02-11	Horse Canyon	Price River Fm.	0.175416	13.9085	0.0262612	1.43107	0.0484455	13.8347			0.102892		164.108	21.0767	167.106	2.36067	121.104	326.311			-1.82654	167.106	2.36067
160413-02-28	Horse Canyon	Price River Fm.	0.200209	31.1852	0.0264928	6.94583	0.0548093	30.4018			0.222729		185.303	52.8327	168.561	11.5562	404.431	684.165			9.03519	168.561	11.5562
160413-02-31	Horse Canyon	Price River Fm.	0.174384	12.2711	0.0266584	6.21517	0.0474428	10.5807			0.506489		163.216	18.5021	169.6	10.4035	71.5986	251.743			-3.91142	169.6	10.4035
160413-02-70	Horse Canyon	Price River Fm.	0.177709	14.2669	0.0267061	4.90662	0.0482613	13.3966			0.343917		166.088	21.8599	169.9	8.22744	112.119	316.441			-2.29534	169.9	8.22744
160413-02-95	Horse Canyon	Price River Fm.	0.174249	30.8744	0.0268544	6.69326	0.0470603	30.1402			0.21679		163.1	46.528	170.831	11.284	52.2635	722.802			-4.73998	170.831	11.284
160413-02-91	Horse Canyon	Price River Fm.	0.178226	40.2467	0.026935	8.67085	0.0479902	39.3015			0.215443		166.533	61.8353	171.337	14.6607	98.7673	937.66			-2.88485	171.337	14.6607
160413-02-54	Horse Canyon	Price River Fm.	0.179934	18.7921	0.0269435	4.1674	0.0484348	18.3242			0.221763		168.004	29.0998	171.39	7.04841	120.562	432.535			-2.01585	171.39	7.04841
160413-02-10	Horse Canyon	Price River Fm.	0.184396	37.2538	0.0269616	7.28367	0.0496026	36.5348			0.195515		171.836	58.9083	171.504	12.3271	176.393	858.257			0.193463	171.504	12.3271
160413-02-34	Horse Canyon	Price River Fm.	0.186525	4.36644	0.0271706	1.03017	0.0497894	4.24318			0.235928		173.66	6.96979	172.816	1.75664	185.15	98.8208			0.486149	172.816	1.75664
160413-02-106	Horse Canyon	Price River Fm.	0.181437	19.7886	0.0271923	3.08551	0.0483925	19.5466			0.155924		169.296	30.8598	172.952	5.2655	118.503	461.719			-2.15947	172.952	5.2655
160413-02-17	Horse Canyon	Price River Fm.	0.179243	21.2069	0.0272118	4.25741	0.0477732	20.7752			0.200756		167.409	32.7329	173.074	7.27045	88.0736	493.638			-3.38405	173.074	7.27045
160413-02-79	Horse Canyon	Price River Fm.	0.181891	19.4074	0.0272456	3.96657	0.0484186	18.9978			0.204384		169.686	30.3294	173.286	6.78196	119.77	448.597			-2.12175	173.286	6.78196
160413-02-118	Horse Canyon	Price River Fm.	0.196905	6.41164	0.0273431	1.55325	0.0522285	6.22066			0.242254		182.504	10.7103	173.898	2.66496	295.445	141.981			4.71544	173.898	2.66496
160413-02-55	Horse Canyon	Price River Fm.	0.181272	9.63082	0.0273488	2.48257	0.048072	9.30535			0.257773		169.155	15.0066	173.934	4.2603	102.792	220.103			-2.8253	173.934	4.2603
160413-02-72	Horse Canyon	Price River Fm.	0.180939	35.8482	0.027465	7.71604	0.0477806	35.008			0.215242		168.868	55.7842	174.663	13.2961	88.4403	835.375			-3.43158	174.663	13.2961
160413-02-15	Horse Canyon	Price River Fm.	0.1737	11.817	0.0274803	4.99512	0.0458434	10.7093			0.422708		162.625	17.7578	174.759	8.61215	0.0	258.801			-7.46143	174.759	8.61215
160413-02-25	Horse Canyon	Price River Fm.	0.175543	34.8868	0.0275151	7.98518	0.0462711	33.9607			0.228888		164.218	52.9095	174.978	13.7844	11.7673	821.743			-6.55212	174.978	13.7844
160413-02-120	Horse Canyon	Price River Fm.	0.194505	9.29493	0.0275442	1.78847	0.0512151	9.12124			0.192414		180.466	15.3683	175.16	3.09051	250.499	209.932			2.93984	175.16	3.09051
160413-02-117	Horse Canyon	Price River Fm.	0.191732	29.5008	0.0275871	4.95285	0.0504066	29.0821			0.167888		178.106	48.2016	175.429	8.57158	213.807	676.759			1.503	175.429	8.57158
160413-02-66	Horse Canyon	Price River Fm.	0.197011	33.0831	0.0278119	4.57971	0.0513756	32.7646			0.138431		182.594	55.3013	176.839	7.98867	257.705	757.331			3.15141	176.839	7.98867
160413-02-110	Horse Canyon	Price River Fm.	0.209267	18.9854	0.0278656	6.83682	0.0544667	17.7116			0.36011		192.938	33.3632	177.176	11.9483	390.376	398.185			8.16924	177.176	11.9483
160413-02-19	Horse Canyon	Price River Fm.	0.188379	18.1724	0.0279611	2.77275	0.0488626	17.9596			0.15258		175.245	29.2516	177.775	4.8619	141.236	422.277			-1.44357	177.775	4.8619
160413-02-74	Horse Canyon	Price River Fm.	0.190311	13.5949	0.0280769	7.90085	0.0491601	11.0634			0.581163		176.894	22.0712	178.501	13.9096	155.453	259.173			-0.908243	178.501	13.9096
160413-02-9	Horse Canyon	Price River Fm.	0.189683	15.3079	0.0281368	2.32204	0.0488935	15.1307			0.15169		176.358	24.7835	178.877	4.0965	142.712	355.492			-1.42799	178.877	4.0965
160413-02-65	Horse Canyon	Price River Fm.	0.181226	24.415	0.0283051	6.43278	0.0464359	23.5523			0.263476		169.115	38.0386	179.931	11.4146	20.309	567.163			-6.39619	179.931	11.4146
160413-02-39	Horse Canyon	Price River Fm.	0.189644	13.3903	0.0284072	3.55972	0.0484183	12.9085			0.265843		176.326	21.675	180.572	6.33867	119.76	304.454			-2.4083	180.572	6.33867
160413-02-50	Horse Canyon	Price River Fm.	0.194275	4.8772	0.0286622	1.97194	0.0491593	4.46078			0.404317		180.27	8.05591	182.17	3.54199	155.431	104.452			-1.05385	182.17	3.54199
160413-02-8	Horse Canyon	Price River Fm.	0.205461	4.01513	0.0300159	1.82904	0.0496451	3.57433			0.455536		189.736	6.94874	190.648	3.43595	178.388	83.3204			-0.480319	190.648	3.43595
160413-02-96	Horse Canyon	Price River Fm.	0.212299	10.0322	0.0318416	3.55258	0.0483562	9.38209			0.354119		195.48	17.8392	202.064	7.06716	116.738	221.321			-3.36801	202.064	7.06716
160413-02-92	Horse Canyon	Price River Fm.	0.228069	6.82596	0.0331358	2.5764	0.0499191	6.32107			0.377441		208.603	12.8719	210.145	5.32687	191.251	147.044			-0.738879	210.145	5.32687
160413-02-5	Horse Canyon	Price River Fm.	0.239815	9.30238	0.0341127	3.77925	0.0509869	8.50009			0.406267		218.269	18.2707	216.237	8.0366	240.214	196.046			0.930772	216.237	8.0366
160413-02-46	Horse Canyon	Price River Fm.	0.233697	6.8082	0.0342353	2.921	0.0495084	6.14975			0.429041		213.246	13.0952	217.001	6.2331	171.955	143.586			-1.76071	217.001	6.2331
160413-02-104	Horse Canyon	Price River Fm.	0.24275	7.66648	0.035164	2.66208	0.050068	7.18945			0.347236		220.67	15.2058	222.787	5.82945	198.132	167.06			-0.959434	222.787	5.82945
160413-02-4	Horse Canyon	Price River Fm.	0.246303	6.63653	0.0352207	4.19977	0.050719	5.13862			0.632827		223.569	13.3175	223.14	9.21104	228.08	118.751			0.19168	223.14	9.21104
160413-02-111	Horse Canyon	Price River Fm.	0.250097	6.80785	0.035445	3.57452	0.0511743	5.79393			0.525059		226.655	13.8297	224.537	7.88796	248.693	133.389			0.934359	224.537	7.88796
160413-02-3	Horse Canyon	Price River Fm.	0.255103	7.09069	0.0362063	3.29638	0.0511011	6.27788			0.464888		230.713	14.634	229.275	7.42493	245.416	144.621			0.623451	229.275	7.42493
160413-02-56	Horse Canyon	Price River Fm.	0.25947	8.71257	0.036471	6.71117	0.0515987	5.556			0.770286		234.24	18.2259	230.921	15.2232	267.645	127.459			1.4168	230.921	15.2232
160413-02-64	Horse Canyon	Price River Fm.	0.256443	4.39183	0.0365048	2.96339	0.0509495	3.24138			0.67475		231.796	9.10178	231.131	6.72799	238.556	74.7322			0.286857	231.131	6.72799
160413-02-44	Horse Canyon	Price River Fm.	0.256396	5.09095	0.036814	2.46972	0.0505122	4.45177			0.48512		231.758	10.5491	233.054	5.65299	218.633	103.042			-0.559289	233.054	5.65299
160413-02-30	Horse Canyon	Price River Fm.	0.261338	4.8934	0.0374607	3.60563	0.0505971	3.30829			0.736835		235.744	10.2947	237.074	8.39273	222.531	76.5402			-0.563919	237.074	8.39273
160413-02-36	Horse Canyon	Price River Fm.	0.604983	11.9206	0.0731429	2.97536	0.0599887	11.5433			0.249598		480.391	45.6325	455.063	13.0729	603.147	250.018			5.27243	455.063	13.0729
160413-02-77	Horse Canyon	Price River Fm.	1.49119	10.9075	0.149606	4.52872	0.0722908	9.92297			0.415191		926.802	66.3189	898.754	37.9922	994.157	201.799			9.5964	898.754	37.9922
160413-02-80	Horse Canyon	Price River Fm.	1.78671	9.54529	0.16911	7.83487	0.0766271	5.45229			0.82081		1040.63	62.1609	1007.21	73.0582	1111.48	108.868			9.38168	1007.21	73.0582
160413-02-73	Horse Canyon	Price River Fm.	1.89334	9.62189	0.177077	3.52633	0.0775468	8.95242			0.366491		1078.75	63.9533	1050.99	34.198	1135.27	178.209			7.42377	1050.99	34.198
160413-02-62	Horse Canyon	Price River Fm.	1.81319	2.20123	0.177175	1.91688	0.0742228	1.08213			0.87082		1050.23	14.4061	1051.53	18.5984	1047.55	21.8571			-0.379354	1051.53	18.5984
160413-02-33	Horse Canyon	Price River Fm.	1.87452	4.51853	0.178396	2.69457	0.0762087	3.62718			0.596338		1072.13	29.9215	1058.2	26.2968	1100.57	72.5615			3.84974	1058.2	26.2968
160413-02-107	Horse Canyon	Price River Fm.	1.88638	12.0515	0.180636	4.25649	0.0757396	11.2747			0.353193		1076.31	80.0147	1070.45	41.9817	1088.18	226.121			1.6294	1070.45	41.9817
160413-02-63	Horse Canyon	Price River Fm.	1.90857	3.48611	0.184524	2.39184	0.075016	2.53615			0.686106		1084.09	23.2284	1091.64	24.0193	1068.95	51.0129			-2.1231	1091.64	24.0193
160413-02-58	Horse Canyon	Price River Fm.	1.93559	8.22118	0.188048	2.59799	0.0746524	7.79989			0.316012		1093.48	55.054	1110.79	26.5088	1059.18	157.047			-4.87314	1110.79	26.5088
160413-02-60	Horse Canyon	Price River Fm.	2.20065	5.91321	0.200897	3.26689	0.0794469	4.92884			0.552473		1181.25	41.2882	1180.14	35.2307	1183.31	97.4518			0.268128	1180.14	35.2307
160413-02-27	Horse Canyon	Price River Fm.	2.65992	5.16063	0.227435	2.95411	0.0848225	4.23147			0.572432		1317.4	38.0873	1321.04	35.2862	1311.47	82.1089			-0.730147	1311.47	82.1089
160413-02-99	Horse Canyon	Price River Fm.	2.94829	3.50373	0.241119	1.64109	0.0886823	3.09563			0.468383		1394.41	26.5672	1392.51	20.5527	1397.29	59.3512			0.341813	1397.29	59.3512
160413-02-108	Horse Canyon	Price River Fm.	3.22987	3.89291	0.256517	2.4086	0.0913204	3.05834			0.618714		1464.36	30.1853	1472	31.698	1453.28	58.1929			-1.2882	1453.28	58.1929
160413-02-41	Horse Canyon	Price River Fm.	4.02581	11.4211	0.290507	6.98643	0.100507	9.03505			0.611711		1639.42	92.9586	1644.06	101.386	1633.46	167.945			-0.649051	1633.46	167.945
160413-02-23	Horse Canyon	Price River Fm.	4.06821	7.11086	0.290501	3.41301	0.101567	6.23825			0.479971		1647.95	57.9721	1644.03	49.5275	1652.94	115.636			0.539098	1652.94	115.636
160413-02-52	Horse Canyon	Price River Fm.	4.25558	2.47598	0.299273	2.27142	0.103131	0.985461			0.917382		1684.81	20.3577	1687.7	33.7275	1681.2	18.1987			-0.3866	1681.2	18.1987
160413-02-101	Horse Canyon	Price River Fm.	4.129	2.50661	0.289637	2.10073	0.103393	1.36748			0.838078		1660.06	20.4901	1639.71	30.4142	1685.88	25.2386			2.73856	1685.88	25.2386
160413-02-71	Horse Canyon	Price River Fm.	4.22883	4.94466	0.296063	4.9245	0.103594	0.446135			0.995921		1679.63	40.6107	1671.75	72.5174	1689.47	8.23013			1.04884	1689.47	8.23013
160413-02-6	Horse Canyon	Price River Fm.	4.35084	1.63665	0.304503	1.53932	0.103629	0.555979			0.940532		1703.05	13.5127	1713.6	23.163	1690.09	10.2557			-1.39133	1690.09	10.2557
160413-02-115	Horse Canyon	Price River Fm.	4.37986	3.14732	0.303262	3.105	0.104747	0.514356			0.986555		1708.55	26.0186	1707.47	46.5767	1709.85	9.46434			0.13963	1709.85	9.46434
160413-02-13	Horse Canyon	Price River Fm.	3.46203	6.98784	0.239326	6.9366	0.104916	0.844678			0.992667		1518.61	55.0653	1383.19	86.3526	1712.82	15.5366			19.2447	1712.82	15.5366
160413-02-61	Horse Canyon	Price River Fm.	4.47353	8.65781	0.308993	3.27977	0.105003	8.01254			0.378822		1726.07	71.879	1735.75	49.9086	1714.34	147.396			-1.24874	1714.34	147.396
160413-02-18	Horse Canyon	Price River Fm.	4.4164	2.70915	0.303467	2.69016	0.105549	0.320253			0.992988		1715.42	22.4305	1708.48	40.3747	1723.89	5.88233			0.893912	1723.89	5.88233
160413-02-114	Horse Canyon	Price River Fm.	4.47482	2.60749	0.306716	2.38124	0.105813	1.06241			0.91323		1726.31	21.6409	1724.53	36.0311	1728.46	19.503			0.227692	1728.46	19.503
160413-02-98	Horse Canyon	Price River Fm.	4.50734	2.40281	0.307331	1.68617	0.106368	1.71182			0.701748		1732.33	19.9683	1727.56	25.5529	1738.07	31.3836			0.604818	1738.07	31.3836
160413-02-83	Horse Canyon	Price River Fm.	4.49597	2.38033	0.302852	2.03228	0.107669	1.23927			0.853782		1730.23	19.7724	1705.44	30.4536	1760.33	22.6596			3.11806	1760.33	22.6596
160413-02-119	Horse Canyon	Price River Fm.	4.65379	2.71971	0.311766	2.21276	0.108262	1.5813			0.8136		1758.97	22.732	1749.39	33.902	1770.36	28.8741			1.18432	1770.36	28.8741
160413-02-47	Horse Canyon	Price River Fm.	4.66456	4.6463	0.312331	4.5369	0.108317	1.00228			0.976456		1760.91	38.8539	1752.17	69.6071	1771.28	18.2976			1.07914	1771.28	18.2976
160413-02-43	Horse Canyon	Price River Fm.	4.70243	4.06767	0.31423	3.97282	0.108536	0.87328			0.976683		1767.67	34.0627	1761.49	61.2345	1774.97	15.9348			0.759881	1774.97	15.9348
160413-02-78	Horse Canyon	Price River Fm.	4.65398	3.60988	0.310236	3.48785	0.1088	0.930667			0.966195		1759.01	30.1734	1741.87	53.2379	1779.41	16.973			2.10975	1779.41	16.973
160413-02-85	Horse Canyon	Price River Fm.	4.72782	1.96612	0.309437	1.83008	0.110812	0.718631			0.930808		1772.18	16.4786	1737.94	27.879	1812.76	13.0513			4.12743	1812.76	13.0513
160413-02-53	Horse Canyon	Price River Fm.	4.87599	3.06606	0.316643	1.3177	0.111684	2.76847			0.429769		1798.12	25.8355	1773.31	20.4285	1826.99	50.205			2.93775	1826.99	50.205
160413-02-35	Horse Canyon	Price River Fm.	4.97631	1.26973	0.320189	1.20991	0.11272	0.385148			0.952886		1815.3	10.7354	1790.65	18.9165	1843.7	6.97047			2.87758	1843.7	6.97047
160413-02-100	Horse Canyon	Price River Fm.	5.30832	5.17976	0.336467	3.45653	0.114423	3.85776			0.667315		1870.2	44.2641	1869.65	56.0979	1870.8	69.5895			0.0612461	1870.8	69.5895
160413-02-40	Horse Canyon	Price River Fm.	12.8401	2.0085	0.472348	1.81902	0.197154	0.851612			0.90566		2667.99	18.921	2493.85	37.6191	2802.76	13.9308			11.0217	2802.76	13.9308
160413-01-80	Horse Canyon	Price River Fm.	0.106365	26.6895	0.0149567	3.42531	0.0515776	26.4687			0.128339		102.635	26.0552	95.7033	3.25392	266.717	609.552			6.75354	95.7033	3.25392
160413-01-74	Horse Canyon	Price River Fm.	0.0946866	11.8208	0.0151734	4.2709	0.0452589	11.0223			0.361304		91.8598	10.382	97.0795	4.1151	0.0	267.949			-5.68219	97.0795	4.1151
160413-01-76	Horse Canyon	Price River Fm.	0.0900284	39.4103	0.015249	5.72756	0.0428189	38.9919			0.145332		87.5298	33.0537	97.5597	5.54572	0.0	980.494			-11.4587	97.5597	5.54572
160413-01-2	Horse Canyon	Price River Fm.	0.0891371	35.5659	0.0153238	5.19015	0.042188	35.1852			0.145931		86.6992	29.5577	98.0346	5.04965	0.0	889.914			-13.0744	98.0346	5.04965
160413-01-41	Horse Canyon	Price River Fm.	0.194131	411.794	0.0153682	13.3535	0.0916157	411.577			0.0324278		180.148	706.999	98.3164	13.0291	1459.41	1162.93			45.4246	98.3164	13.0291
160413-01-88	Horse Canyon	Price River Fm.	0.0983179	60.5146	0.0154105	7.57362	0.0462717	60.0387			0.125154		95.2224	55.0174	98.5846	7.40962	11.7822	1472.66			-3.53088	98.5846	7.40962
160413-01-57	Horse Canyon	Price River Fm.	0.116695	19.2313	0.0158992	5.2679	0.0532327	18.4958			0.273923		112.072	20.4067	101.686	5.3147	338.704	419.662			9.26668	101.686	5.3147
160413-01-21	Horse Canyon	Price River Fm.	0.166229	15.3076	0.0233637	2.38052	0.0516017	15.1214			0.155512		156.141	22.1553	148.88	3.50349	267.779	347.25			4.65062	148.88	3.50349
160413-01-92	Horse Canyon	Price River Fm.	0.154786	25.9277	0.0234106	3.58497	0.0479531	25.6786			0.138268		146.129	35.2912	149.175	5.28648	96.9311	609.869			-2.08491	149.175	5.28648
160413-01-66	Horse Canyon	Price River Fm.	0.168798	72.9429	0.0242838	10.7952	0.0504137	72.1396			0.147995		158.375	107.064	154.673	16.4986	214.136	1721.43			2.33754	154.673	16.4986
160413-01-7	Horse Canyon	Price River Fm.	0.147703	48.8658	0.025094	10.0188	0.0426892	47.8277			0.205027		139.882	63.8761	159.77	15.8103	0.0	1209.42			-14.2179	159.77	15.8103
160413-01-64	Horse Canyon	Price River Fm.	0.169234	14.5057	0.0252533	3.57588	0.0486035	14.058			0.246516		158.754	21.3191	160.772	5.6779	128.771	331.09			-1.27113	160.772	5.6779
160413-01-77	Horse Canyon	Price River Fm.	0.327675	436.212	0.025258	8.75832	0.0940902	436.124			0.0200781		287.79	1222.01	160.801	13.9093	1509.91	1202.16			44.1255	160.801	13.9093
160413-01-70	Horse Canyon	Price River Fm.	0.15985	15.3474	0.025625	3.53964	0.0452425	14.9337			0.230634		150.572	21.4779	163.108	5.70102	0.0	363.29			-8.32608	163.108	5.70102
160413-01-12	Horse Canyon	Price River Fm.	0.169591	27.5983	0.025666	5.0664	0.0479231	27.1292			0.183577		159.064	40.6386	163.366	8.17276	95.4616	644.766			-2.70432	163.366	8.17276
160413-01-56	Horse Canyon	Price River Fm.	0.178943	18.4157	0.0257829	5.98139	0.0503365	17.4172			0.324799		167.151	28.3836	164.101	9.69162	210.577	404.339			1.82483	164.101	9.69162
160413-01-50	Horse Canyon	Price River Fm.	0.178565	13.7749	0.0259435	6.14457	0.0499191	12.3285			0.446071		166.825	21.1922	165.11	10.0165	191.248	286.989			1.02805	165.11	10.0165
160413-01-93	Horse Canyon	Price River Fm.	0.163475	19.5967	0.0259765	4.01974	0.0456425	19.18			0.205124		153.74	27.9598	165.317	6.56084	0.0	465.055			-7.53008	165.317	6.56084
160413-01-13	Horse Canyon	Price River Fm.	0.180699	9.99753	0.0261413	5.37616	0.0501332	8.42897			0.537749		168.662	15.5363	166.353	8.829	201.189	195.796			1.36881	166.353	8.829
160413-01-43	Horse Canyon	Price River Fm.	0.175122	24.5859	0.0262267	4.77256	0.0484277	24.1182			0.194118		163.854	37.2067	166.889	7.86267	120.223	570.099			-1.85246	166.889	7.86267
160413-01-38	Horse Canyon	Price River Fm.	0.181497	49.0958	0.0265378	7.21786	0.0496026	48.5624			0.147016		169.348	76.6158	168.843	12.0286	176.393	1147.35			0.298431	168.843	12.0286
160413-01-96	Horse Canyon	Price River Fm.	0.127999	50.0838	0.0265866	9.68932	0.0349174	49.1376			0.193462		122.298	57.722	169.149	16.1763	0.0	1385.42			-38.3094	169.149	16.1763
160413-01-95	Horse Canyon	Price River Fm.	0.181154	12.4829	0.026893	3.61747	0.0488548	11.9472			0.289795		169.053	19.4401	171.073	6.10712	140.892	280.69			-1.195	171.073	6.10712
160413-01-6	Horse Canyon	Price River Fm.	0.188383	14.123	0.026924	1.81788	0.0507459	14.0055			0.128718		175.249	22.7331	171.268	3.07245	229.283	323.83			2.27154	171.268	3.07245
160413-01-85	Horse Canyon	Price River Fm.	0.182758	33.5179	0.0269708	5.67722	0.0491452	33.0336			0.169379		170.431	52.5999	171.562	9.61147	154.788	778.044			-0.663368	171.562	9.61147
160413-01-8	Horse Canyon	Price River Fm.	0.182992	10.8638	0.027279	3.9724	0.0486522	10.1115			0.365656		170.632	17.0636	173.496	6.80004	131.107	237.983			-1.67843	173.496	6.80004
160413-01-9	Horse Canyon	Price River Fm.	0.182384	20.6318	0.0274873	2.52458	0.0481231	20.4768			0.122364		170.11	32.3171	174.803	4.35375	105.301	484.977			-2.75884	174.803	4.35375
160413-01-5	Horse Canyon	Price River Fm.	0.18828	6.61216	0.0275062	1.25888	0.0496446	6.49122			0.190389		175.161	10.6381	174.922	2.17245	178.365	151.352			0.136463	174.922	2.17245
160413-01-47	Horse Canyon	Price River Fm.	0.177216	18.7293	0.0275626	2.79158	0.0466318	18.5201			0.149049		165.662	28.6304	175.275	4.82703	30.4314	444.629			-5.80277	175.275	4.82703
160413-01-55	Horse Canyon	Price River Fm.	0.184293	23.8164	0.0275633	3.23191	0.0484927	23.5961			0.135701		171.748	37.6361	175.28	5.58857	123.355	557.355			-2.05629	175.28	5.58857
160413-01-69	Horse Canyon	Price River Fm.	0.18502	25.212	0.0275676	4.70475	0.0486764	24.7692			0.186607		172.371	39.9748	175.307	8.1366	132.291	584.284			-1.70316	175.307	8.1366
160413-01-31	Horse Canyon	Price River Fm.	0.18927	21.5664	0.0278478	5.67491	0.0492934	20.8064			0.263137		176.006	34.854	177.065	9.91152	161.791	487.658			-0.60135	177.065	9.91152
160413-01-11	Horse Canyon	Price River Fm.	0.190498	4.65645	0.0278544	2.71433	0.0496014	3.78351			0.582918		177.054	7.56568	177.106	4.7418	176.336	88.2567			-0.0294501	177.106	4.7418
160413-01-68	Horse Canyon	Price River Fm.	0.18927	7.8428	0.0279057	2.48672	0.0491911	7.43812			0.317071		176.006	12.6738	177.428	4.35197	156.927	174.157			-0.807748	177.428	4.35197
160413-01-75	Horse Canyon	Price River Fm.	0.19672	19.085	0.0279677	1.74281	0.0510139	19.0053			0.0913183		182.347	31.8576	177.817	3.05666	241.455	438.918			2.48435	177.817	3.05666
160413-01-20	Horse Canyon	Price River Fm.	0.170439	39.9753	0.0280431	10.6744	0.0440799	38.5238			0.267025		159.8	59.124	178.289	18.7706	0.0	955.085			-11.5705	178.289	18.7706
160413-01-26	Horse Canyon	Price River Fm.	0.193053	19.4596	0.0281065	4.91661	0.0498159	18.8282			0.252658		179.231	31.9754	178.686	8.66467	186.392	439.118			0.303659	178.686	8.66467
160413-01-36	Horse Canyon	Price River Fm.	0.178355	47.9861	0.0281175	6.81109	0.0460051	47.5002			0.141939		166.644	73.781	178.756	12.008	0.0	1159.34			-7.26815	178.756	12.008
160413-01-10	Horse Canyon	Price River Fm.	0.190006	18.6615	0.0282894	3.94802	0.0487125	18.2391			0.21156		176.634	30.257	179.834	7.00175	134.011	429.479			-1.81143	179.834	7.00175
160413-01-19	Horse Canyon	Price River Fm.	0.199739	8.26536	0.0282973	4.57212	0.0511938	6.88562			0.553167		184.906	13.9725	179.883	8.11077	249.558	158.514			2.71646	179.883	8.11077
160413-01-99	Horse Canyon	Price River Fm.	0.190007	71.8407	0.0283096	5.03852	0.0486782	71.6638			0.0701347		176.635	116.6	179.96	8.94193	132.354	1734.7			-1.88224	179.96	8.94193
160413-01-82	Horse Canyon	Price River Fm.	0.174714	30.9927	0.0283916	5.37718	0.0446311	30.5226			0.173498		163.502	46.8126	180.474	9.56982	0.0	750.079			-10.3801	180.474	9.56982
160413-01-49	Horse Canyon	Price River Fm.	0.195789	4.88807	0.0283985	3.09243	0.0500025	3.78551			0.632649		181.557	8.12649	180.517	5.50493	195.13	87.9955			0.572545	180.517	5.50493
160413-01-32	Horse Canyon	Price River Fm.	0.196257	5.16026	0.0284183	3.46443	0.0500872	3.82439			0.671368		181.954	8.59617	180.641	6.17132	199.042	88.7993			0.721729	180.641	6.17132
160413-01-91	Horse Canyon	Price River Fm.	0.191429	5.81594	0.0284787	1.53555	0.0487513	5.60957			0.264024		177.848	9.48839	181.02	2.74098	135.906	131.853			-1.78358	181.02	2.74098
160413-01-79	Horse Canyon	Price River Fm.	0.186782	18.6985	0.0286292	2.59846	0.0473178	18.5171			0.138966		173.88	29.8835	181.963	4.66213	65.3005	441.671			-4.64892	181.963	4.66213
160413-01-84	Horse Canyon	Price River Fm.	0.207323	17.8675	0.0286671	11.6884	0.052452	13.514			0.65417		191.304	31.1566	182.201	20.9982	305.177	308.269			4.75829	182.201	20.9982
160413-01-33	Horse Canyon	Price River Fm.	0.191586	10.2481	0.028702	3.18537	0.0484117	9.74045			0.310826		177.981	16.7309	182.419	5.72928	119.458	229.712			-2.49344	182.419	5.72928
160413-01-94	Horse Canyon	Price River Fm.	0.198846	6.41454	0.0290251	3.20547	0.049687	5.55619			0.499719		184.149	10.8032	184.444	5.8285	180.355	129.502			-0.159743	184.444	5.8285
160413-01-61	Horse Canyon	Price River Fm.	0.21411	14.5706	0.0299079	5.88581	0.0519218	13.3289			0.40395		196.996	26.0922	189.972	11.0182	281.99	305.238			3.56556	189.972	11.0182
160413-01-59	Horse Canyon	Price River Fm.	0.212031	27.9911	0.0299164	5.18785	0.0514029	27.5061			0.18534		195.255	49.7303	190.025	9.71435	258.928	634.566			2.67859	190.025	9.71435
160413-01-63	Horse Canyon	Price River Fm.	0.21155	8.76673	0.0302999	4.37925	0.0506371	7.59459			0.49953		194.852	15.5434	192.425	8.30225	224.332	175.669			1.24553	192.425	8.30225
160413-01-4	Horse Canyon	Price River Fm.	0.239409	7.57981	0.0333186	3.56115	0.0521138	6.69116			0.469821		217.936	14.8669	211.285	7.40221	290.424	152.891			3.05214	211.285	7.40221
160413-01-48	Horse Canyon	Price River Fm.	0.237935	8.96329	0.0349689	4.49275	0.0493486	7.75601			0.501239		216.728	17.4932	221.572	9.78555	164.406	181.312			-2.23506	221.572	9.78555
160413-01-3	Horse Canyon	Price River Fm.	0.244206	3.75535	0.0351565	2.24683	0.0503789	3.00905			0.598302		221.859	7.48421	222.741	4.91914	212.491	69.739			-0.397593	222.741	4.91914
160413-01-22	Horse Canyon	Price River Fm.	0.258025	7.78072	0.0366208	2.18406	0.0511015	7.46789			0.280702		233.074	16.2043	231.853	4.97382	245.425	172.042			0.524058	231.853	4.97382
160413-01-62	Horse Canyon	Price River Fm.	0.256644	5.68024	0.0369804	3.32464	0.0503337	4.60564			0.585299		231.959	11.7793	234.089	7.64299	210.432	106.78			-0.918208	234.089	7.64299
160413-01-24	Horse Canyon	Price River Fm.	0.263008	7.14613	0.0374326	2.04174	0.0509585	6.84824			0.285713		237.088	15.1102	236.9	4.74909	238.931	157.95			0.0794298	236.9	4.74909
160413-01-14	Horse Canyon	Price River Fm.	0.319149	2.21121	0.0445401	1.61808	0.0519686	1.50708			0.731761		281.247	5.43201	280.913	4.44779	284.047	34.4924			0.118843	280.913	4.44779
160413-01-60	Horse Canyon	Price River Fm.	0.509144	7.38873	0.0675172	1.47572	0.0546921	7.23986			0.199725		417.873	25.3123	421.18	6.01674	399.637	162.228			-0.791402	421.18	6.01674
160413-01-54	Horse Canyon	Price River Fm.	1.86307	5.36309	0.175469	2.62111	0.0770066	4.67894			0.488733		1068.08	35.4394	1042.17	25.2229	1121.38	93.2822			7.06304	1042.17	25.2229
160413-01-35	Horse Canyon	Price River Fm.	1.94148	12.3721	0.187924	2.65062	0.074929	12.0849			0.214241		1095.51	82.9627	1110.12	27.0308	1066.62	243.185			-4.07853	1110.12	27.0308
160413-01-15	Horse Canyon	Price River Fm.	1.99305	7.77254	0.188346	3.66414	0.0767469	6.85467			0.471421		1113.16	52.5647	1112.41	37.4374	1114.6	136.869			0.196736	1112.41	37.4374
160413-01-17	Horse Canyon	Price River Fm.	2.01281	17.5444	0.188706	4.44266	0.0773596	16.9726			0.253224		1119.84	119.151	1114.36	45.4648	1130.48	338.558			1.42529	1114.36	45.4648
160413-01-44	Horse Canyon	Price River Fm.	2.01504	2.50512	0.190429	1.51027	0.0767449	1.99868			0.602873		1120.59	17.0004	1123.7	15.5741	1114.55	39.859			-0.820831	1123.7	15.5741
160413-01-53	Horse Canyon	Price River Fm.	2.03622	4.61582	0.190529	4.12937	0.0775105	2.06256			0.894611		1127.7	31.4344	1124.24	42.6015	1134.34	41.055			0.890078	1124.24	42.6015
160413-01-83	Horse Canyon	Price River Fm.	2.04505	10.7235	0.192363	5.08091	0.0771047	9.44346			0.473808		1130.65	73.1587	1134.16	52.8415	1123.88	188.37			-0.915064	1134.16	52.8415
160413-01-18	Horse Canyon	Price River Fm.	2.68506	3.15464	0.225546	1.47826	0.0863412	2.78685			0.468598		1324.35	23.3404	1311.11	17.5378	1345.82	53.8143			2.57858	1345.82	53.8143
160413-01-81	Horse Canyon	Price River Fm.	3.02527	2.00749	0.247002	1.68809	0.0888306	1.08644			0.840897		1414.01	15.32	1422.99	21.555	1400.49	20.8197			-1.60673	1400.49	20.8197
160413-01-58	Horse Canyon	Price River Fm.	3.11272	4.64687	0.251508	1.54823	0.0897609	4.38137			0.333177		1435.84	35.7146	1446.25	20.0573	1420.43	83.7431			-1.81761	1420.43	83.7431
160413-01-46	Horse Canyon	Price River Fm.	3.14789	4.01483	0.250948	1.79091	0.0909776	3.59325			0.446075		1444.48	30.9401	1443.36	23.1599	1446.12	68.4386			0.190479	1446.12	68.4386
160413-01-23	Horse Canyon	Price River Fm.	3.36937	4.40411	0.264387	3.81123	0.0924288	2.20697			0.86538		1497.3	34.4873	1512.25	51.3743	1476.19	41.8631			-2.4423	1476.19	41.8631
160413-01-89	Horse Canyon	Price River Fm.	4.27565	2.67284	0.301195	2.55072	0.102956	0.798707			0.954309		1688.69	21.9961	1697.23	38.0616	1678.07	14.7557			-1.14198	1678.07	14.7557
160413-01-72	Horse Canyon	Price River Fm.	4.30403	2.39402	0.302213	2.15896	0.103291	1.03452			0.901813		1694.13	19.7261	1702.27	32.2994	1684.06	19.0977			-1.08137	1684.06	19.0977
160413-01-30	Horse Canyon	Price River Fm.	4.45961	3.19958	0.311833	3.15978	0.103723	0.503153			0.987558		1723.49	26.5389	1749.72	48.4195	1691.76	9.27929			-3.42596	1691.76	9.27929
160413-01-16	Horse Canyon	Price River Fm.	4.15576	2.16897	0.289609	1.80001	0.104073	1.21012			0.829892		1665.35	17.7522	1639.58	26.0584	1697.97	22.2965			3.43903	1697.97	22.2965
160413-01-37	Horse Canyon	Price River Fm.	4.42194	8.55087	0.307472	8.46725	0.104305	1.19293			0.990221		1716.46	70.8394	1728.26	128.366	1702.08	21.9684			-1.53797	1702.08	21.9684
160413-01-90	Horse Canyon	Price River Fm.	4.42125	1.0607	0.306271	0.827231	0.104698	0.663907			0.779892		1716.33	8.78356	1722.33	12.5031	1709	12.214			-0.780031	1709	12.214
160413-01-78	Horse Canyon	Price River Fm.	4.26588	10.3562	0.293179	10.2162	0.105529	1.69721			0.98648		1686.8	85.2363	1657.4	149.315	1723.54	31.1759			3.83776	1723.54	31.1759
160413-01-52	Horse Canyon	Price River Fm.	4.50747	5.10867	0.30903	5.02776	0.105787	0.905655			0.984161		1732.35	42.4602	1735.93	76.5153	1728.01	16.6263			-0.458202	1728.01	16.6263
160413-01-65	Horse Canyon	Price River Fm.	4.65505	1.63993	0.316153	1.26534	0.106789	1.04322			0.771579		1759.2	13.7073	1770.92	19.5937	1745.3	19.1069			-1.46772	1745.3	19.1069
160413-01-45	Horse Canyon	Price River Fm.	4.75168	1.67331	0.316425	1.5321	0.108912	0.672793			0.915608		1776.41	14.0368	1772.24	23.7399	1781.28	12.2662			0.507266	1781.28	12.2662
160413-01-29	Horse Canyon	Price River Fm.	5.03271	3.17261	0.33422	3.11343	0.109211	0.609908			0.981348		1824.84	26.8758	1858.8	50.2764	1786.28	11.1161			-4.05967	1786.28	11.1161
160413-01-40	Horse Canyon	Price River Fm.	13.6776	2.42379	0.533557	2.38361	0.185921	0.439505			0.983422		2727.65	22.935	2756.42	53.4611	2706.4	7.2534			-1.84843	2706.4	7.2534
BC-07-Spot168	Horse Canyon	Bluecastle T.	0.168472	5.16239	0.0256098	4.3014	0.0477321	2.85452			0.833218		158.092	7.55776	163.013	6.92391	86.0339	67.6711			-3.11235	163.013	6.92391
XOM-BC-007-38	Horse Canyon	Bluecastle T.	0.25972	6.86812	0.0381763	3.21262	0.0493413	6.07043			0.467758		234.441	14.3783	241.519	7.61553	164.058	141.929			-3.01889	241.519	7.61553
XOM-BC-007-94	Horse Canyon	Bluecastle T.	0.258369	46.7059	0.0415569	8.95992	0.0450917	45.8384			0.191837		233.352	97.4468	262.476	23.0453	0.0	1128.21			-12.4808	262.476	23.0453
XOM-BC-007-99	Horse Canyon	Bluecastle T.	0.335528	15.3968	0.0451396	13.1589	0.05391	7.99404			0.854651		293.777	39.2816	284.612	36.6372	367.269	180.184			3.11965	284.612	36.6372
BC-07-Spot197	Horse Canyon	Bluecastle T.	0.333498	5.39883	0.0466508	5.00324	0.0518706	2.02854			0.926727		292.233	13.71	293.927	14.3756	279.734	46.4599			-0.579622	293.927	14.3756
BC-07-Spot61	Horse Canyon	Bluecastle T.	0.351179	4.748	0.0490227	4.35614	0.0519779	1.8888			0.917468		305.607	12.5303	308.519	13.123	284.442	43.1983			-0.952708	308.519	13.123
BC-07-Spot194	Horse Canyon	Bluecastle T.	0.363526	4.14802	0.0506759	3.74793	0.0520502	1.77739			0.903546		314.844	11.2292	318.67	11.6531	287.609	40.6152			-1.21506	318.67	11.6531
BC-07-Spot79	Horse Canyon	Bluecastle T.	0.510801	6.27102	0.0553239	5.07605	0.0669927	3.68231			0.809446		418.988	21.5293	347.125	17.1542	837.564	76.7418			17.1516	347.125	17.1542
XOM-BC-007-80	Horse Canyon	Bluecastle T.	0.432707	12.637	0.0579982	3.2423	0.0541101	12.214			0.256571		365.097	38.7583	363.44	11.4578	375.615	275.058			0.45393	363.44	11.4578
XOM-BC-007-16	Horse Canyon	Bluecastle T.	0.44399	30.045	0.0590197	7.45566	0.05456	29.1053			0.24815		373.062	93.8686	369.661	26.7854	394.213	655.911			0.911478	369.661	26.7854
XOM-BC-007-3	Horse Canyon	Bluecastle T.	0.437677	17.1969	0.0599304	4.89754	0.052967	16.4848			0.284791		368.613	53.1707	375.202	17.8512	327.405	374.684			-1.78753	375.202	17.8512
BC-07-Spot184	Horse Canyon	Bluecastle T.	0.451553	4.3911	0.0613623	3.73894	0.0533943	2.30262			0.851481		378.366	13.8703	383.905	13.9349	345.567	52.0482			-1.46388	383.905	13.9349
XOM-BC-007-27	Horse Canyon	Bluecastle T.	0.5065	15.8097	0.0618974	5.34908	0.0593479	14.8773			0.338342		416.093	53.9841	387.154	20.0996	579.862	323.601			6.95482	387.154	20.0996
BC-07-Spot59	Horse Canyon	Bluecastle T.	0.457078	5.20623	0.0622999	4.21275	0.0532342	3.05901			0.809175		382.224	16.5833	389.597	15.9266	338.77	69.271			-1.92911	389.597	15.9266
BC-07-Spot53	Horse Canyon	Bluecastle T.	0.475724	4.72496	0.0631073	4.45046	0.0546969	1.58702			0.941904		395.135	15.4663	394.495	17.0304	399.834	35.5609			0.161877	394.495	17.0304
BC-07-Spot187	Horse Canyon	Bluecastle T.	0.487722	5.12696	0.0636738	4.76957	0.0555775	1.88068			0.930292		403.357	17.0667	397.929	18.4056	435.51	41.8897			1.34566	397.929	18.4056
XOM-BC-007-100	Horse Canyon	Bluecastle T.	0.489916	9.01182	0.0640304	7.8625	0.0554925	4.40386			0.872465		404.853	30.0908	400.09	30.5009	432.098	98.1315			1.17652	400.09	30.5009
BC-07-Spot165	Horse Canyon	Bluecastle T.	0.496951	4.01378	0.0658578	3.52268	0.0547512	1.92384			0.877646		409.636	13.5299	411.152	14.0314	402.057	43.0924			-0.369998	411.152	14.0314
BC-07-Spot114	Horse Canyon	Bluecastle T.	0.496527	6.4756	0.0659611	5.5584	0.0546189	3.32228			0.858361		409.349	21.8165	411.777	22.1725	396.634	74.4881			-0.59306	411.777	22.1725
XOM-BC-007-56	Horse Canyon	Bluecastle T.	0.473856	25.4631	0.0662963	5.90573	0.0518389	24.7687			0.231933		393.849	83.1715	413.803	23.6703	278.333	568.984			-5.06652	413.803	23.6703
BC-07-Spot191	Horse Canyon	Bluecastle T.	0.526568	4.19364	0.0687138	3.70203	0.055603	1.97016			0.882774		429.53	14.6881	428.402	15.3441	436.531	43.8882			0.262546	428.402	15.3441
BC-07-Spot177	Horse Canyon	Bluecastle T.	0.535031	5.5219	0.0690084	4.7413	0.0562555	2.83044			0.858637		435.143	19.5431	430.179	19.7305	462.487	62.7477			1.14083	430.179	19.7305
XOM-BC-007-59	Horse Canyon	Bluecastle T.	0.498932	9.77852	0.0690357	3.45644	0.0524163	9.14726			0.353473		410.979	33.0522	430.343	14.3889	303.613	208.559			-4.71174	430.343	14.3889
XOM-BC-007-22	Horse Canyon	Bluecastle T.	0.503687	15.5371	0.0694975	4.23761	0.0525642	14.948			0.272741		414.195	52.8568	433.127	17.7512	310.025	340.74			-4.57093	433.127	17.7512
BC-07-Spot174	Horse Canyon	Bluecastle T.	0.530903	4.2834	0.0697719	3.64828	0.0552106	2.24445			0.851726		432.409	15.0832	434.781	15.339	420.741	50.1085			-0.548597	434.781	15.339
BC-07-Spot6	Horse Canyon	Bluecastle T.	0.537781	5.34078	0.0700472	4.53378	0.0557061	2.82291			0.848898		436.961	18.9653	436.44	19.1323	440.653	62.8256			0.119218	436.44	19.1323
BC-07-Spot99	Horse Canyon	Bluecastle T.	0.545505	5.11333	0.0713182	4.27297	0.0554991	2.80854			0.835652		442.048	18.3263	444.093	18.3371	432.365	62.6185			-0.462609	444.093	18.3371
XOM-BC-007-39	Horse Canyon	Bluecastle T.	0.543396	8.42992	0.0724145	2.79173	0.0544239	7.95423			0.33117		440.661	30.1387	450.686	12.1522	388.613	178.599			-2.27484	450.686	12.1522
XOM-BC-007-19	Horse Canyon	Bluecastle T.	0.583332	11.4206	0.0737719	5.44581	0.0573487	10.0386			0.476842		466.6	42.7293	458.84	24.119	504.968	220.996			1.66311	458.84	24.119
BC-07-Spot58	Horse Canyon	Bluecastle T.	0.653734	4.70553	0.082698	4.34474	0.057358	1.80702			0.923325		510.774	18.888	512.207	21.3929	505.332	39.7339			-0.28048	512.207	21.3929
XOM-BC-007-58	Horse Canyon	Bluecastle T.	0.710291	8.56713	0.0863189	2.21644	0.0596801	8.27545			0.258715		544.919	36.1308	533.73	11.3533	591.991	179.483			2.05343	533.73	11.3533
BC-07-Spot183	Horse Canyon	Bluecastle T.	0.703931	4.98295	0.0878492	4.59581	0.0581407	1.92569			0.922308		541.136	20.903	542.804	23.9249	535.069	42.1654			-0.308244	542.804	23.9249
XOM-BC-007-20	Horse Canyon	Bluecastle T.	0.698208	29.5491	0.0905531	5.51445	0.0559217	29.03			0.18662		537.72	123.51	558.808	29.5174	449.239	647.916			-3.92162	558.808	29.5174
BC-07-Spot34	Horse Canyon	Bluecastle T.	0.738131	4.1843	0.0914663	3.73848	0.0585545	1.87941			0.893453		561.314	18.0433	564.203	20.196	550.55	41.006			-0.514639	564.203	20.196
XOM-BC-007-31	Horse Canyon	Bluecastle T.	0.706663	17.0428	0.09165	7.02654	0.0559215	15.527			0.412287		542.763	71.6831	565.288	38.0285	449.233	345.344			-4.15002	565.288	38.0285
BC-07-Spot173	Horse Canyon	Bluecastle T.	0.768673	5.7674	0.0922236	5.26597	0.0604766	2.35213			0.913057		579.001	25.4523	568.674	28.6634	620.649	50.771			1.78359	568.674	28.6634
BC-07-Spot172	Horse Canyon	Bluecastle T.	0.8036	6.27732	0.0974122	6.10948	0.0598569	1.44187			0.973263		598.857	28.4009	599.226	34.9596	598.398	31.1916			-0.0614744	599.226	34.9596
XOM-BC-007-91	Horse Canyon	Bluecastle T.	0.84471	8.68904	0.102175	3.21392	0.0599603	8.0728			0.369883		621.742	40.4053	627.14	19.2064	602.12	174.81			-4.15538	627.14	19.2064
XOM-BC-007-9	Horse Canyon	Bluecastle T.	0.924518	4.70991	0.106688	2.75619	0.0628492	3.81925			0.585189		664.746	22.9749	653.482	17.1284	703.153	81.2962			7.06397	653.482	17.1284
BC-07-Spot20	Horse Canyon	Bluecastle T.	0.902709	5.53193	0.107686	4.72714	0.0608244	2.8734			0.854518		653.174	26.6506	659.293	29.625	633.051	61.9118			-4.1454	659.293	29.625
XOM-BC-007-68	Horse Canyon	Bluecastle T.	0.986802	7.35868	0.114901	6.22328	0.0622883	3.92696			0.845706		697.087	37.1153	701.146	41.3452	684.042	83.8105			-2.50044	701.146	41.3452
BC-07-Spot71	Horse Canyon	Bluecastle T.	1.61341	7.45413	0.15421	6.58064	0.0759139	3.50131			0.882819		975.435	46.7349	924.519	56.6783	1092.78	70.1235			15.3975	924.519	56.6783
BC-07-Spot162	Horse Canyon	Bluecastle T.	1.55554	5.07862	0.156279	4.72423	0.0722217	1.8639			0.930218		952.697	31.3913	936.067	41.1613	992.203	37.8614			5.65766	936.067	41.1613
BC-07-Spot133	Horse Canyon	Bluecastle T.	1.52897	4.01733	0.158322	3.62228	0.0700723	1.73724			0.901664		942.085	24.6629	947.444	31.9163	930.452	35.6986			-1.82616	947.444	31.9163
BC-07-Spot22	Horse Canyon	Bluecastle T.	1.59796	4.22364	0.162567	3.60552	0.0713213	2.19985			0.853652		969.412	26.3799	971.029	32.5014	966.624	44.866			-0.455732	971.029	32.5014
BC-07-Spot9	Horse Canyon	Bluecastle T.	1.63232	5.39587	0.163523	5.01058	0.0724294	2.00238			0.928595		982.756	33.9781	976.326	45.3954	998.013	40.6501			2.17296	976.326	45.3954
BC-07-Spot54	Horse Canyon	Bluecastle T.	1.60974	4.46419	0.164106	3.94151	0.0711738	2.09606			0.882918		974.008	27.9614	979.554	35.819	962.428	42.8111			-1.77945	979.554	35.819
BC-07-Spot200	Horse Canyon	Bluecastle T.	1.69503	4.97426	0.166537	4.60583	0.0738504	1.87874			0.925932		1006.66	31.7693	993.005	42.3878	1037.36	37.9767			4.27594	993.005	42.3878
BC-07-Spot211	Horse Canyon	Bluecastle T.	1.65379	4.45694	0.167247	3.7466	0.0717481	2.41398			0.840621		991.004	28.2039	996.926	34.6061	978.783	49.1851			-1.85362	996.926	34.6061
BC-07-Spot119	Horse Canyon	Bluecastle T.	1.83991	4.02234	0.168136	3.61951	0.0794005	1.75453			0.899851		1059.83	26.4622	1001.84	33.5844	1182.16	34.7055			15.2536	1001.84	33.5844
BC-07-Spot164	Horse Canyon	Bluecastle T.	1.65714	5.55367	0.16866	5.20788	0.0712909	1.92903			0.937738		992.284	35.1721	1004.73	48.4514	965.787	39.3865			-4.03179	1004.73	48.4514
XOM-BC-007-42	Horse Canyon	Bluecastle T.	1.68531	5.34441	0.1692	3.39582	0.0722402	4.12688			0.635397		1002.99	34.0609	1007.7	31.6792	992.694	83.8934			-1.51166	1007.7	31.6792
BC-07-Spot146	Horse Canyon	Bluecastle T.	1.67398	4.3234	0.170062	3.84331	0.0714217	1.98009			0.888956		998.699	27.4836	1012.45	36.01	969.488	40.3798			-4.43183	1012.45	36.01
XOM-BC-007-2	Horse Canyon	Bluecastle T.	1.71651	5.84277	0.170249	3.17214	0.0731241	4.90668			0.542917		1014.72	37.4915	1013.48	29.7493	1017.38	99.4036			0.382785	1013.48	29.7493
BC-07-Spot44	Horse Canyon	Bluecastle T.	1.72747	4.64984	0.17111	4.15825	0.0732525	2.08085			0.894279		1018.81	29.9054	1018.22	39.1659	1020.93	42.1242			0.26477	1018.22	39.1659
BC-07-Spot31	Horse Canyon	Bluecastle T.	1.72577	3.85128	0.171629	3.38439	0.072959	1.838			0.878771		1018.18	24.76	1021.08	31.9596	1012.79	37.2151			-0.818278	1021.08	31.9596
BC-07-Spot100	Horse Canyon	Bluecastle T.	1.77124	5.85078	0.171919	5.40599	0.0747553	2.23761			0.923978		1034.98	37.975	1022.68	51.1237	1061.95	45.056			3.69807	1022.68	51.1237
BC-07-Spot112	Horse Canyon	Bluecastle T.	1.72183	5.04863	0.172373	4.64106	0.0724785	1.98725			0.919272		1016.71	32.4317	1025.17	43.9887	999.389	40.3609			-2.57991	1025.17	43.9887
BC-07-Spot195	Horse Canyon	Bluecastle T.	1.76436	4.29111	0.172747	3.88249	0.074108	1.82753			0.904776		1032.45	27.8112	1027.23	36.8669	1044.39	36.9035			1.64293	1027.23	36.8669
BC-07-Spot95	Horse Canyon	Bluecastle T.	1.8411	4.25592	0.172837	4.0262	0.0772908	1.37933			0.946024		1060.25	28.0054	1027.72	38.2484	1128.72	27.489			8.94824	1027.72	38.2484
BC-07-Spot55	Horse Canyon	Bluecastle T.	1.80711	3.99105	0.173387	3.58592	0.0756232	1.75204			0.898491		1048.03	26.0895	1030.75	34.1583	1085.13	35.127			5.01165	1030.75	34.1583
XOM-BC-007-14	Horse Canyon	Bluecastle T.	1.7922	4.76655	0.173429	3.47521	0.0749484	3.26235			0.729083		1042.62	31.0676	1030.98	33.1105	1067.14	65.6129			3.38825	1030.98	33.1105
XOM-BC-007-41	Horse Canyon	Bluecastle T.	1.8074	5.83013	0.173585	5.0959	0.0755165	2.83234			0.874064		1048.14	38.1162	1031.83	48.589	1082.28	56.7762			4.66171	1031.83	48.589
BC-07-Spot109	Horse Canyon	Bluecastle T.	1.73165	5.74573	0.174381	5.3555	0.0720527	2.08135			0.932084		1020.37	36.9878	1036.2	51.2637	987.42	42.3348			-4.94047	1036.2	51.2637
BC-07-Spot17	Horse Canyon	Bluecastle T.	1.79253	5.21969	0.175477	4.90814	0.0741198	1.77631			0.940313		1042.75	34.0239	1042.22	47.2328	1044.71	35.8693			0.238568	1042.22	47.2328
BC-07-Spot214	Horse Canyon	Bluecastle T.	1.7872	4.64194	0.176635	4.43823	0.073415	1.36006			0.956114		1040.81	30.2251	1048.57	42.9502	1025.41	27.5158			-2.25808	1048.57	42.9502
XOM-BC-007-50	Horse Canyon	Bluecastle T.	1.81139	7.17549	0.177043	2.55292	0.0742047	6.70599			0.355783		1049.58	46.9516	1050.8	24.7539	1047.06	135.258			-0.357341	1050.8	24.7539
BC-07-Spot120	Horse Canyon	Bluecastle T.	1.81344	4.61028	0.177052	4.02528	0.074317	2.24762			0.873109		1050.32	30.1755	1050.85	39.0321	1050.11	45.3395			-0.0709365	1050.85	39.0321
BC-07-Spot47	Horse Canyon	Bluecastle T.	1.78872	4.2932	0.1772	3.91084	0.0732431	1.77113			0.910938		1041.36	27.9625	1051.66	37.9493	1020.67	35.8574			-3.03653	1051.66	37.9493
BC-07-Spot198	Horse Canyon	Bluecastle T.	1.80178	5.81485	0.177587	4.88331	0.0736168	3.15687			0.839799		1046.1	37.974	1053.78	47.4737	1030.96	63.8514			-2.21323	1053.78	47.4737
BC-07-Spot161	Horse Canyon	Bluecastle T.	1.82353	4.19172	0.177948	3.88122	0.0743543	1.58323			0.925926		1053.95	27.4896	1055.76	37.7968	1051.12	31.9431			-0.441468	1055.76	37.7968
XOM-BC-007-53	Horse Canyon	Bluecastle T.	1.83142	5.94125	0.178068	4.2862	0.0745937	4.11424			0.72143		1056.79	39.0252	1056.41	41.7645	1057.59	82.8366			0.111981	1056.41	41.7645
XOM-BC-007-6	Horse Canyon	Bluecastle T.	1.93753	4.79866	0.178447	4.33038	0.0787477	2.0676			0.902414		1094.15	32.1405	1058.49	42.2712	1165.78	40.9646			9.20397	1058.49	42.2712
BC-07-Spot190	Horse Canyon	Bluecastle T.	1.84786	4.79324	0.17877	4.489	0.0750001	1.68049			0.936527		1062.67	31.5824	1060.25	43.887	1068.52	33.7522			0.773772	1060.25	43.887
XOM-BC-007-75	Horse Canyon	Bluecastle T.	1.82763	4.92962	0.178879	2.30462	0.0741015	4.35773			0.467506		1055.43	32.3553	1060.85	22.5428	1044.21	87.9214			-1.59293	1060.85	22.5428
XOM-BC-007-49	Horse Canyon	Bluecastle T.	1.87005	4.74565	0.179272	4.10597	0.0756556	2.37955			0.865206		1070.55	31.3996	1062.99	40.2377	1085.99	47.6651			2.11737	1062.99	40.2377
BC-07-Spot134	Horse Canyon	Bluecastle T.	1.90508	4.45152	0.180658	4.02734	0.0765144	1.89646			0.904711		1082.87	29.6431	1070.57	39.7257	1108.54	37.878			3.42557	1070.57	39.7257
XOM-BC-007-47	Horse Canyon	Bluecastle T.	1.88533	4.28834	0.180768	1.46331	0.0756422	4.03095			0.341231		1075.94	28.4537	1071.17	14.4415	1085.6	80.781			1.32909	1071.17	14.4415
XOM-BC-007-73	Horse Canyon	Bluecastle T.	1.85211	14.5698	0.180834	4.38013	0.0742821	13.8958			0.300631		1064.18	96.1406	1071.53	43.2412	1049.16	280.431			-2.13218	1071.53	43.2412
BC-07-Spot210	Horse Canyon	Bluecastle T.	1.84576	5.1273	0.180888	4.7345	0.0740376	1.96819			0.92339		1061.92	33.7704	1071.83	46.7515	1042.47	39.7535			-2.81579	1071.83	46.7515
XOM-BC-007-36	Horse Canyon	Bluecastle T.	1.89484	7.00626	0.181142	4.49087	0.075867	5.37771			0.640979		1079.28	46.5737	1073.21	44.3983	1091.55	107.772			1.68003	1073.21	44.3983
BC-07-Spot60	Horse Canyon	Bluecastle T.	1.84722	4.13744	0.18122	3.88253	0.0739607	1.42982			0.938389		1062.44	27.2575	1073.64	38.398	1040.38	28.8997			-3.19678	1073.64	38.398
BC-07-Spot153	Horse Canyon	Bluecastle T.	1.86072	4.51667	0.181586	4.08399	0.0743509	1.92907			0.904205		1067.24	29.8322	1075.63	40.4596	1051.02	38.9134			-2.34149	1075.63	40.4596
BC-07-Spot182	Horse Canyon	Bluecastle T.	1.89647	3.61856	0.182185	3.34	0.0755305	1.39226			0.923019		1079.85	24.0582	1078.9	33.1812	1082.66	27.9103			0.346938	1078.9	33.1812
BC-07-Spot186	Horse Canyon	Bluecastle T.	1.91356	4.70508	0.182693	4.40621	0.0759989	1.65018			0.936479		1085.83	31.3798	1081.67	43.8769	1095.06	33.0382			1.22264	1081.67	43.8769
XOM-BC-007-96	Horse Canyon	Bluecastle T.	1.91296	4.3037	0.183018	2.40567	0.0758071	3.56855			0.558977		1085.62	28.6993	1083.44	23.9915	1089.98	71.4837			0.599719	1083.44	23.9915
BC-07-Spot189	Horse Canyon	Bluecastle T.	1.89416	4.4462	0.183561	4.13645	0.0748728	1.63049			0.930333		1079.04	29.5491	1086.4	41.3559	1065.11	32.7767			-1.99877	1086.4	41.3559
XOM-BC-007-87	Horse Canyon	Bluecastle T.	1.92343	6.99898	0.183591	3.7421	0.0759844	5.91459			0.534663		1089.26	46.7655	1086.56	37.4183	1094.68	118.442			0.7414	1086.56	37.4183
XOM-BC-007-82	Horse Canyon	Bluecastle T.	1.90957	2.99841	0.183725	2.78285	0.0753816	1.11635			0.928107		1084.43	19.9822	1087.29	27.8437	1078.71	22.3631			-0.795569	1087.29	27.8437
XOM-BC-007-90	Horse Canyon	Bluecastle T.	1.91555	2.73771	0.184118	1.83182	0.0754565	2.03457			0.669108		1086.52	18.2642	1089.43	18.3613	1080.69	40.783			-0.809001	1089.43	18.3613
BC-07-Spot98	Horse Canyon	Bluecastle T.	1.96884	5.17184	0.184793	4.59266	0.0773061	2.37812			0.888011		1104.91	34.829	1093.1	46.1771	1129.1	47.3329			3.18781	1093.1	46.1771
XOM-BC-007-60	Horse Canyon	Bluecastle T.	1.9417	8.71144	0.185013	1.75125	0.0761165	8.53359			0.201029		1095.59	58.4014	1094.3	17.6257	1098.12	170.875			0.347576	1094.3	17.6257
BC-07-Spot102	Horse Canyon	Bluecastle T.	1.92478	4.74652	0.185187	4.42835	0.0754152	1.70857			0.932967		1089.73	31.7197	1095.25	44.6052	1079.57	34.2482			-1.45209	1095.25	44.6052
BC-07-Spot92	Horse Canyon	Bluecastle T.	1.92889	4.88678	0.185268	4.30708	0.075543	2.30861			0.881374		1091.15	32.681	1095.69	43.3997	1082.97	46.2694			-1.17485	1095.69	43.3997
BC-07-Spot203	Horse Canyon	Bluecastle T.	1.94133	4.84519	0.185422	4.46238	0.075967	1.8876			0.920991		1095.46	32.4738	1096.53	44.9962	1094.22	37.7571			-0.211003	1096.53	44.9962
BC-07-Spot156	Horse Canyon	Bluecastle T.	1.92836	4.13218	0.186009	3.66884	0.0752216	1.90119			0.88787		1090.97	27.6312	1099.72	37.0932	1074.45	38.178			-2.35193	1099.72	37.0932
BC-07-Spot78	Horse Canyon	Bluecastle T.	1.96379	3.76708	0.188562	3.44254	0.0755666	1.52966			0.913846		1103.18	25.3458	1113.58	35.207	1083.59	30.6643			-2.76709	1113.58	35.207
XOM-BC-007-40	Horse Canyon	Bluecastle T.	2.0791	17.4233	0.18864	9.50967	0.0799356	14.5992			0.545803		1141.94	119.595	1114.01	97.2918	1195.41	288.33			6.80933	1114.01	97.2918
XOM-BC-007-89	Horse Canyon	Bluecastle T.	1.98947	7.44225	0.188845	3.01237	0.0764064	6.80534			0.404767		1111.94	50.2998	1115.12	30.8467	1105.72	136.1			-0.849716	1115.12	30.8467
BC-07-Spot137	Horse Canyon	Bluecastle T.	1.99658	5.39716	0.188851	4.94896	0.0767109	2.1534			0.916956		1114.36	36.5177	1115.15	50.6787	1113.67	42.9929			-0.132842	1115.15	50.6787
XOM-BC-007-66	Horse Canyon	Bluecastle T.	2.02945	4.74031	0.190578	2.30553	0.0772334	4.14186			0.486367		1125.43	32.2469	1124.51	23.7905	1127.2	82.4958			0.239378	1124.51	23.7905
XOM-BC-007-10	Horse Canyon	Bluecastle T.	2.01775	4.09065	0.190808	3.91827	0.0766955	1.17496			0.957861		1121.5	27.7737	1125.75	40.4734	1113.26	23.4662			-1.12187	1125.75	40.4734
BC-07-Spot90	Horse Canyon	Bluecastle T.	2.09349	7.1306	0.192235	6.66622	0.0790178	2.5312			0.934875		1146.67	49.0075	1133.47	69.2904	1172.6	50.1165			3.33665	1133.47	69.2904
XOM-BC-007-15	Horse Canyon	Bluecastle T.	2.14065	14.0186	0.193617	5.74904	0.0801863	12.7856			0.4101		1162.03	97.094	1140.94	60.1167	1201.58	252.225			5.04711	1140.94	60.1167
BC-07-Spot110	Horse Canyon	Bluecastle T.	2.08877	4.69751	0.19374	4.31063	0.0782271	1.86684			0.917641		1145.12	32.2581	1141.61	45.0994	1152.63	37.0946			0.956275	1141.61	45.0994
XOM-BC-007-63	Horse Canyon	Bluecastle T.	2.03756	8.3264	0.194505	4.35572	0.0759764	7.09624			0.523122		1128.15	56.7264	1145.73	45.7217	1094.47	142.12			-4.68408	1145.73	45.7217
XOM-BC-007-44	Horse Canyon	Bluecastle T.	2.07606	10.594	0.195207	5.25861	0.0771334	9.19676			0.496375		1140.93	72.6308	1149.52	55.3661	1124.65	183.441			-2.21139	1149.52	55.3661
BC-07-Spot199	Horse Canyon	Bluecastle T.	2.07269	4.81329	0.195425	4.42465	0.0769558	1.89479			0.919257		1139.82	32.9705	1150.7	46.6292	1120.06	37.8327			-2.73519	1150.7	46.6292
BC-07-Spot170	Horse Canyon	Bluecastle T.	2.22411	5.04021	0.206322	4.73457	0.0782164	1.72846			0.93936		1188.66	35.3077	1209.19	52.2016	1152.36	34.3108			-4.93225	1152.36	34.3108
XOM-BC-007-74	Horse Canyon	Bluecastle T.	2.11798	2.45866	0.195766	2.12577	0.0784662	1.23536			0.864605		1154.68	16.9585	1152.54	22.435	1158.68	24.5207			0.530677	1152.54	22.435
BC-07-Spot88	Horse Canyon	Bluecastle T.	2.24777	5.19386	0.207731	4.82926	0.0785124	1.91164			0.929803		1196.09	36.5034	1216.72	53.5466	1159.85	37.9057			-4.90269	1159.85	37.9057
BC-07-Spot101	Horse Canyon	Bluecastle T.	2.15814	5.55498	0.197918	5.27311	0.0791193	1.74703			0.949258		1167.67	38.549	1164.12	56.1624	1175.14	34.5666			0.937239	1164.12	56.1624
BC-07-Spot206	Horse Canyon	Bluecastle T.	2.28634	4.42532	0.201956	4.13412	0.0821433	1.5788			0.934195		1208.08	31.2635	1185.82	44.7787	1248.93	30.9045			5.05282	1185.82	44.7787
BC-07-Spot130	Horse Canyon	Bluecastle T.	2.28217	4.21187	0.2053	3.98483	0.0806577	1.36418			0.946095		1206.79	29.7388	1203.73	43.7546	1213.13	26.8197			0.775268	1213.13	26.8197
BC-07-Spot115	Horse Canyon	Bluecastle T.	2.38821	4.57062	0.213929	4.17512	0.0810011	1.85982			0.913469		1239.07	32.7148	1249.71	47.4312	1221.49	36.5591			-2.31053	1221.49	36.5591
BC-07-Spot149	Horse Canyon	Bluecastle T.	2.41761	5.09927	0.214927	4.72012	0.0816174	1.92951			0.925646		1247.85	36.631	1255.02	53.8289	1236.37	37.8051			-1.50811	1236.37	37.8051
XOM-BC-007-70	Horse Canyon	Bluecastle T.	2.38206	4.59196	0.209523	1.63277	0.0824557	4.29188			0.355571		1237.23	32.8426	1226.27	18.2331	1256.38	83.9355			2.39616	1256.38	83.9355
XOM-BC-007-103	Horse Canyon	Bluecastle T.	2.53866	3.77989	0.222554	3.3096	0.0827309	1.82595			0.875581		1283.19	27.536	1295.35	38.8385	1262.89	35.6724			-2.57087	1262.89	35.6724
BC-07-Spot155	Horse Canyon	Bluecastle T.	2.44077	4.81096	0.213754	4.50403	0.0828516	1.6909			0.9362		1254.7	34.6558	1248.78	51.1333	1265.7	33.0202			1.33662	1265.7	33.0202
BC-07-Spot38	Horse Canyon	Bluecastle T.	2.42209	5.03043	0.211811	4.61008	0.0829719	2.01305			0.916439		1249.18	36.156	1238.46	51.9448	1268.57	39.2977			2.37382	1268.57	39.2977
XOM-BC-007-26	Horse Canyon	Bluecastle T.	2.50764	6.20298	0.217859	4.65201	0.083481	4.10314			0.749964		1274.25	45.0352	1270.55	53.6464	1280.47	79.9678			0.774393	1280.47	79.9678
BC-07-Spot28	Horse Canyon	Bluecastle T.	2.70898	4.12798	0.231105	3.72668	0.085052	1.77541			0.902785		1330.92	30.6162	1340.29	45.0978	1316.71	34.4241			-1.7908	1316.71	34.4241
BC-07-Spot39	Horse Canyon	Bluecastle T.	2.58095	3.62635	0.21936	3.03257	0.085371	1.98844			0.836261		1295.25	26.5403	1278.49	35.1686	1323.96	38.5138			3.43441	1323.96	38.5138
XOM-BC-007-45	Horse Canyon	Bluecastle T.	2.74321	4.29537	0.232418	4.28333	0.0856028	0.321369			0.997197		1340.25	31.9655	1347.16	52.0731	1329.21	6.22118			-1.3501	1329.21	6.22118
BC-07-Spot129	Horse Canyon	Bluecastle T.	2.74167	5.43374	0.232085	5.02361	0.0857149	2.07097			0.924521		1339.83	40.433	1345.42	61.0019	1331.74	40.068			-1.02665	1331.74	40.068
BC-07-Spot77	Horse Canyon	Bluecastle T.	2.70156	4.75792	0.227237	4.52447	0.0862629	1.47205			0.950935		1328.89	35.2631	1320	54.0056	1344.06	28.4299			1.79032	1344.06	28.4299
BC-07-Spot42	Horse Canyon	Bluecastle T.	2.84748	4.54738	0.238667	4.20926	0.0865677	1.72069			0.925645		1368.15	34.1756	1379.76	52.2834	1350.87	33.2036			-2.13862	1350.87	33.2036
XOM-BC-007-77	Horse Canyon	Bluecastle T.	2.69971	5.06099	0.225972	2.54294	0.0866485	4.37573			0.502459		1328.38	37.5028	1313.36	30.2155	1352.67	84.4199			2.90659	1352.67	84.4199
BC-07-Spot205	Horse Canyon	Bluecastle T.	2.82694	4.40564	0.236695	4.0656	0.0866592	1.69724			0.922816		1362.71	33.0478	1369.49	50.1616	1352.91	32.742			-1.22583	1352.91	32.742
XOM-BC-007-93	Horse Canyon	Bluecastle T.	2.81277	8.58232	0.235259	3.39616	0.0867134	7.88177			0.395716		1358.94	64.3093	1362	41.6962	1354.12	152.072			-0.582522	1354.12	152.072
XOM-BC-007-76	Horse Canyon	Bluecastle T.	2.69254	3.35448	0.224772	1.62529	0.0868797	2.93444			0.484515		1326.41	24.8378	1307.04	19.2282	1357.81	56.5693			3.73888	1357.81	56.5693
BC-07-Spot33	Horse Canyon	Bluecastle T.	2.78588	3.99274	0.232165	3.68919	0.087067	1.52703			0.923975		1351.76	29.8351	1345.83	44.8104	1361.96	29.42			1.18408	1361.96	29.42
BC-07-Spot23	Horse Canyon	Bluecastle T.	2.96248	5.71509	0.246775	5.42541	0.0871047	1.79644			0.949313		1398.05	43.3918	1421.82	69.2258	1362.79	34.6063			-4.33151	1362.79	34.6063
XOM-BC-007-65	Horse Canyon	Bluecastle T.	2.94079	4.68647	0.243366	4.02513	0.0876403	2.40028			0.858883		1392.48	35.5141	1404.17	50.788	1374.59	46.1638			-2.15154	1374.59	46.1638
BC-07-Spot202	Horse Canyon	Bluecastle T.	2.81909	5.76093	0.233187	5.45356	0.087719	1.8566			0.946646		1360.63	43.1854	1351.18	66.4778	1376.32	35.6991			1.8268	1376.32	35.6991
BC-07-Spot180	Horse Canyon	Bluecastle T.	2.79887	4.08707	0.23148	3.71041	0.0877317	1.71377			0.907841		1355.24	30.5776	1342.25	44.9602	1376.6	32.9516			2.49494	1376.6	32.9516
BC-07-Spot169	Horse Canyon	Bluecastle T.	2.7904	4.51113	0.23041	4.11085	0.0878727	1.85773			0.911269		1352.97	33.7238	1336.65	49.6252	1379.69	35.7046			3.11962	1379.69	35.7046
XOM-BC-007-25	Horse Canyon	Bluecastle T.	2.92346	4.3429	0.240712	3.72366	0.0880843	2.23498			0.857413		1388	32.8606	1390.4	46.5711	1384.31	42.9279			-0.439987	1384.31	42.9279
BC-07-Spot40	Horse Canyon	Bluecastle T.	2.92971	3.68531	0.24059	3.27406	0.0883556	1.69175			0.888409		1389.62	27.8994	1389.77	40.9314	1390.21	32.4652			0.031949	1390.21	32.4652
XOM-BC-007-83	Horse Canyon	Bluecastle T.	2.88201	2.90103	0.236278	2.01306	0.088465	2.08891			0.693914		1377.22	21.8695	1367.32	24.8018	1392.58	40.0742			1.81442	1392.58	40.0742
BC-07-Spot91	Horse Canyon	Bluecastle T.	2.78341	4.53821	0.226927	3.78852	0.0889978	2.49849			0.834805		1351.1	33.9038	1318.37	45.1707	1404.09	47.8572			6.10513	1404.09	47.8572
BC-07-Spot50	Horse Canyon	Bluecastle T.	2.8816	4.70619	0.234525	4.34512	0.0891521	1.80779			0.923279		1377.11	35.4786	1358.17	53.2124	1407.41	34.6108			3.4985	1407.41	34.6108
BC-07-Spot196	Horse Canyon	Bluecastle T.	3.05861	4.56237	0.248889	4.26954	0.0891675	1.60818			0.935816		1422.39	34.9148	1432.74	54.8508	1407.74	30.7878			-1.77585	1407.74	30.7878
BC-07-Spot70	Horse Canyon	Bluecastle T.	2.93339	4.16156	0.238255	3.87945	0.0893336	1.50613			0.932211		1390.57	31.5154	1377.62	48.1197	1411.3	28.8201			2.38673	1411.3	28.8201
BC-07-Spot19	Horse Canyon	Bluecastle T.	3.03153	4.44133	0.245935	3.83169	0.0894393	2.24578			0.862736		1415.59	33.9137	1417.48	48.7569	1413.57	42.9609			-0.276881	1413.57	42.9609
XOM-BC-007-5	Horse Canyon	Bluecastle T.	3.17627	10.6564	0.257085	9.35894	0.0896066	5.09594			0.878248		1451.41	82.3391	1474.91	123.387	1417.14	97.4486			-4.07658	1417.14	97.4486
BC-07-Spot123	Horse Canyon	Bluecastle T.	3.16602	4.91859	0.256165	4.22663	0.0896771	2.51559			0.859316		1448.91	37.9589	1470.19	55.5632	1418.64	48.0895			-3.63341	1418.64	48.0895
BC-07-Spot216	Horse Canyon	Bluecastle T.	2.74913	5.81603	0.222042	5.11306	0.0898354	2.77179			0.879132		1341.85	43.3099	1292.66	59.8896	1422.01	52.9634			9.0968	1422.01	52.9634
BC-07-Spot96	Horse Canyon	Bluecastle T.	3.0551	5.76884	0.246556	5.27546	0.0899078	2.33433			0.914474		1421.51	44.1378	1420.69	67.2646	1423.55	44.5944			0.201012	1423.55	44.5944
BC-07-Spot131	Horse Canyon	Bluecastle T.	3.10103	4.3121	0.250101	4.01454	0.0899661	1.57406			0.930994		1432.95	33.1108	1439	51.7757	1424.79	30.0649			-0.99684	1424.79	30.0649
BC-07-Spot48	Horse Canyon	Bluecastle T.	3.01568	3.63319	0.242789	3.39609	0.0901248	1.291			0.934739		1411.59	27.7059	1401.18	42.7692	1428.16	24.647			1.88891	1428.16	24.647
BC-07-Spot136	Horse Canyon	Bluecastle T.	2.92047	7.14216	0.234975	6.81055	0.090182	2.151			0.95357		1387.23	54.0352	1360.52	83.5352	1429.37	41.0597			4.81667	1429.37	41.0597
BC-07-Spot117	Horse Canyon	Bluecastle T.	3.19514	4.48164	0.257038	4.01688	0.0901945	1.98742			0.896296		1455.98	34.6619	1474.67	52.9491	1429.63	37.9355			-3.15027	1429.63	37.9355
BC-07-Spot181	Horse Canyon	Bluecastle T.	3.21429	4.51748	0.258436	4.1866	0.0902442	1.69705			0.926756		1460.61	34.9888	1481.84	55.4248	1430.68	32.3883			-3.57528	1430.68	32.3883
BC-07-Spot27	Horse Canyon	Bluecastle T.	3.15116	4.18852	0.25326	3.83027	0.0902803	1.69491			0.914469		1445.29	32.287	1455.26	49.8971	1431.45	32.344			-1.66382	1431.45	32.344
XOM-BC-007-78	Horse Canyon	Bluecastle T.	2.76637	2.24719	0.22209	2.01871	0.09034	0.987271			0.898323		1346.51	16.7598	1292.91	23.6492	1432.71	18.8367			9.75794	1432.71	18.8367
XOM-BC-007-92	Horse Canyon	Bluecastle T.	3.11802	3.516	0.249999	1.967	0.0904564	2.91431			0.559442		1437.15	27.0331	1438.47	25.3602	1435.17	55.5878			-0.230322	1435.17	55.5878
XOM-BC-007-33	Horse Canyon	Bluecastle T.	2.92812	6.02854	0.234553	5.99435	0.0905413	0.641137			0.994329		1389.21	45.6372	1358.31	73.4168	1436.95	12.2256			5.47268	1436.95	12.2256
BC-07-Spot140	Horse Canyon	Bluecastle T.	3.20695	5.85702	0.25696	5.59466	0.0905555	1.73333			0.955206		1458.84	45.3423	1474.27	73.7294	1437.25	33.0514			-2.57546	1437.25	33.0514
XOM-BC-007-12	Horse Canyon	Bluecastle T.	3.18709	3.52917	0.255217	2.82564	0.09057	2.11442			0.800654		1454.04	27.2779	1465.32	37.0362	1437.56	40.3166			-1.9313	1437.56	40.3166
BC-07-Spot126	Horse Canyon	Bluecastle T.	3.27232	5.57927	0.261928	5.23959	0.0906486	1.91703			0.939117		1474.49	43.3976	1499.7	70.1078	1439.21	36.5445			-4.20255	1439.21	36.5445
BC-07-Spot188	Horse Canyon	Bluecastle T.	3.13142	3.66004	0.250649	3.44512	0.0906491	1.23575			0.941278		1440.44	28.1699	1441.82	44.5097	1439.22	23.557			-0.180583	1439.22	23.557
XOM-BC-007-23	Horse Canyon	Bluecastle T.	3.30985	8.21113	0.264391	6.57106	0.0907948	4.9238			0.800263		1483.38	64.0506	1512.27	88.5779	1442.28	93.8357			-4.85216	1442.28	93.8357
BC-07-Spot138	Horse Canyon	Bluecastle T.	3.22995	4.57599	0.257942	4.19886	0.0908576	1.81914			0.917585		1464.38	35.483	1479.31	55.5027	1443.6	34.6578			-2.47327	1443.6	34.6578
XOM-BC-007-21	Horse Canyon	Bluecastle T.	3.20316	8.32001	0.254781	8.08187	0.091182	1.97636			0.971377		1457.92	64.4024	1463.09	105.789	1450.39	37.6189			-0.875489	1450.39	37.6189
BC-07-Spot171	Horse Canyon	Bluecastle T.	3.32271	6.40474	0.264187	6.13055	0.0912576	1.8539			0.957191		1486.4	49.9983	1511.23	82.5894	1451.97	35.2803			-4.08156	1451.97	35.2803
XOM-BC-007-34	Horse Canyon	Bluecastle T.	3.17396	6.22436	0.252247	5.00907	0.0912587	3.69484			0.804753		1450.85	48.0683	1450.05	65.0452	1451.99	70.3182			0.133132	1451.99	70.3182
XOM-BC-007-52	Horse Canyon	Bluecastle T.	3.07496	4.02403	0.244377	3.06644	0.0912597	2.60572			0.762031		1426.47	30.8348	1409.41	38.8206	1452.01	49.5885			2.93383	1452.01	49.5885
XOM-BC-007-46	Horse Canyon	Bluecastle T.	3.1087	2.99346	0.246558	2.16226	0.091445	2.07014			0.722327		1434.85	22.9984	1420.7	27.5697	1455.87	39.3748			2.41574	1455.87	39.3748
BC-07-Spot63	Horse Canyon	Bluecastle T.	3.07761	4.48549	0.244156	4.16098	0.0914607	1.67507			0.927653		1427.13	34.3787	1408.27	52.6391	1456.19	31.8589			3.29141	1456.19	31.8589
BC-07-Spot158	Horse Canyon	Bluecastle T.	3.2165	3.74007	0.255042	3.28701	0.091508	1.78428			0.878864		1461.14	28.9715	1464.43	43.0601	1457.18	33.9316			-0.497524	1457.18	33.9316
BC-07-Spot151	Horse Canyon	Bluecastle T.	3.1583	5.4978	0.249934	5.0735	0.0916889	2.11786			0.922825		1447.03	42.4052	1438.13	65.3985	1460.93	40.2551			1.56069	1460.93	40.2551
BC-07-Spot4	Horse Canyon	Bluecastle T.	2.96836	4.40226	0.234827	4.05417	0.0917185	1.71569			0.920929		1399.56	33.4388	1359.75	49.7008	1461.55	32.608			6.96517	1461.55	32.608
BC-07-Spot89	Horse Canyon	Bluecastle T.	3.3457	4.83773	0.264379	4.63098	0.091822	1.39917			0.957262		1491.79	37.8224	1512.21	62.423	1463.69	26.5845			-3.31492	1463.69	26.5845
XOM-BC-007-35	Horse Canyon	Bluecastle T.	3.20004	8.61433	0.25066	8.2474	0.0925909	2.48737			0.957405		1457.17	66.6667	1441.88	106.559	1479.52	47.1613			2.54375	1479.52	47.1613
XOM-BC-007-71	Horse Canyon	Bluecastle T.	3.28005	2.90751	0.256644	1.83865	0.0926933	2.25233			0.632379		1476.33	22.6256	1472.65	24.2067	1481.61	42.6925			0.60496	1481.61	42.6925
BC-07-Spot24	Horse Canyon	Bluecastle T.	3.36772	5.86647	0.261248	5.53458	0.0935344	1.94524			0.943425		1496.92	45.937	1496.22	73.9026	1498.71	36.7872			0.166245	1498.71	36.7872
BC-07-Spot121	Horse Canyon	Bluecastle T.	3.04457	6.43507	0.235869	5.24934	0.0936577	3.72217			0.815739		1418.87	49.1951	1365.18	64.5839	1501.2	70.3695			9.0607	1501.2	70.3695
BC-07-Spot73	Horse Canyon	Bluecastle T.	3.40831	3.78783	0.264024	3.58411	0.0936663	1.2255			0.946216		1506.31	29.7385	1510.4	48.2602	1501.38	23.1674			-0.600745	1501.38	23.1674
BC-07-Spot49	Horse Canyon	Bluecastle T.	3.42989	3.73301	0.2642	3.39951	0.0941965	1.5423			0.910663		1511.27	29.3499	1511.29	45.7988	1512.04	29.1119			0.0494481	1512.04	29.1119
BC-07-Spot15	Horse Canyon	Bluecastle T.	3.5274	6.60721	0.271621	6.33628	0.094228	1.87265			0.958995		1533.38	52.2817	1549.02	87.2498	1512.67	35.3455			-2.40307	1512.67	35.3455
BC-07-Spot10	Horse Canyon	Bluecastle T.	3.54296	5.12335	0.270251	4.72913	0.0951232	1.97082			0.923053		1536.86	40.576	1542.07	64.8605	1530.5	37.111			-0.75644	1530.5	37.111
BC-07-Spot192	Horse Canyon	Bluecastle T.	3.44173	4.528	0.26179	4.23576	0.0953919	1.60036			0.935459		1513.98	35.6292	1498.99	56.6523	1535.81	30.1163			2.3971	1535.81	30.1163
BC-07-Spot94	Horse Canyon	Bluecastle T.	3.61335	4.83075	0.273032	4.48892	0.096025	1.78487			0.929238		1552.48	38.4229	1556.18	62.0638	1548.24	33.5336			-0.51229	1548.24	33.5336
BC-07-Spot74	Horse Canyon	Bluecastle T.	3.59729	4.2725	0.271269	4.00377	0.0962192	1.49132			0.937104		1548.93	33.9489	1547.24	55.0749	1552.04	28.0042			0.309065	1552.04	28.0042
BC-07-Spot215	Horse Canyon	Bluecastle T.	3.31077	6.56766	0.249531	6.27385	0.0962705	1.94239			0.955265		1483.59	51.2279	1436.05	80.7672	1553.04	36.47			7.53271	1553.04	36.47
BC-07-Spot204	Horse Canyon	Bluecastle T.	3.38896	4.5205	0.255334	4.36178	0.0963042	1.18733			0.96489		1501.84	35.4458	1465.93	57.1919	1553.7	22.291			5.64916	1553.7	22.291
BC-07-Spot18	Horse Canyon	Bluecastle T.	3.65021	5.04453	0.274662	4.64808	0.0964288	1.96027			0.921409		1560.55	40.2117	1564.42	64.5653	1556.12	36.7877			-0.533305	1556.12	36.7877
BC-07-Spot67	Horse Canyon	Bluecastle T.	3.64016	4.16137	0.273022	3.89509	0.096741	1.4647			0.936009		1558.36	33.1507	1556.13	53.8518	1562.19	27.4645			0.388028	1562.19	27.4645
BC-07-Spot76	Horse Canyon	Bluecastle T.	3.59006	3.7626	0.267664	3.34208	0.0973193	1.72847			0.888238		1547.34	29.8835	1528.94	45.4908	1573.36	32.3639			2.8234	1573.36	32.3639
BC-07-Spot65	Horse Canyon	Bluecastle T.	3.8498	4.15069	0.283875	3.89942	0.098401	1.42224			0.939463		1603.23	33.4583	1610.85	55.5808	1594.02	26.5608			-1.05534	1594.02	26.5608
XOM-BC-007-48	Horse Canyon	Bluecastle T.	3.8481	2.50714	0.2823	1.60382	0.0988629	1.92704			0.639702		1602.87	20.2068	1602.94	22.7613	1602.76	35.9444			-0.0107955	1602.76	35.9444
XOM-BC-007-81	Horse Canyon	Bluecastle T.	3.84847	4.03037	0.281995	3.89983	0.0989795	1.01743			0.967612		1602.95	32.4859	1601.4	55.2996	1604.96	18.9738			0.221822	1604.96	18.9738
BC-07-Spot207	Horse Canyon	Bluecastle T.	3.77323	4.95191	0.276018	4.68089	0.0991889	1.61574			0.945271		1587.07	39.752	1571.28	65.2727	1608.9	30.1131			2.3386	1608.9	30.1131
BC-07-Spot167	Horse Canyon	Bluecastle T.	4.00392	5.72611	0.292223	5.55389	0.0994166	1.39378			0.969924		1634.99	46.5308	1652.63	80.965	1613.18	25.9613			-2.44545	1613.18	25.9613
BC-07-Spot30	Horse Canyon	Bluecastle T.	3.90392	3.25601	0.283106	2.95484	0.100055	1.36766			0.907505		1614.49	26.3207	1606.99	42.0282	1625.09	25.4356			1.11382	1625.09	25.4356
BC-07-Spot80	Horse Canyon	Bluecastle T.	3.94222	4.631	0.285881	4.35611	0.100056	1.57177			0.940641		1622.39	37.5122	1620.91	62.4317	1625.1	29.2322			0.2578	1625.1	29.2322
BC-07-Spot219	Horse Canyon	Bluecastle T.	3.80885	5.30112	0.276172	5.02736	0.100069	1.68152			0.948358		1594.62	42.6397	1572.05	70.1347	1625.36	31.2727			3.27943	1625.36	31.2727
XOM-BC-007-72	Horse Canyon	Bluecastle T.	3.91776	7.84299	0.28351	3.91603	0.100223	6.79539			0.499303		1617.36	63.4635	1609.02	55.7618	1628.21	126.371			1.17881	1628.21	126.371
XOM-BC-007-97	Horse Canyon	Bluecastle T.	3.51697	11.0214	0.254004	10.2871	0.100422	3.95561			0.933375		1531.04	87.1877	1459.09	134.329	1631.89	73.5109			10.5888	1631.89	73.5109
BC-07-Spot72	Horse Canyon	Bluecastle T.	3.90886	4.23752	0.282414	3.84286	0.100427	1.78579			0.906865		1615.52	34.2652	1603.51	54.5549	1631.99	33.1837			1.74495	1631.99	33.1837
BC-07-Spot125	Horse Canyon	Bluecastle T.	4.05377	3.8913	0.292288	3.37588	0.100632	1.93537			0.867545		1645.06	31.6959	1652.96	49.222	1635.77	35.9462			-1.05059	1635.77	35.9462
BC-07-Spot11	Horse Canyon	Bluecastle T.	4.08992	3.94273	0.294745	3.48882	0.100683	1.83665			0.884873		1652.29	32.1712	1665.2	51.1989	1636.72	34.1083			-1.74	1636.72	34.1083
XOM-BC-007-104	Horse Canyon	Bluecastle T.	4.12889	9.49206	0.296734	9.39745	0.100917	1.33683			0.990033		1660.04	77.6268	1675.09	138.631	1641.03	24.8145			-2.07591	1641.03	24.8145
XOM-BC-007-7	Horse Canyon	Bluecastle T.	3.4789	7.5608	0.24932	6.9215	0.101201	3.04278			0.915446		1522.44	59.6476	1434.97	89.0449	1646.24	56.4391			12.8334	1646.24	56.4391
BC-07-Spot21	Horse Canyon	Bluecastle T.	4.12351	5.36011	0.29562	5.10111	0.101209	1.64602			0.951682		1658.97	43.8097	1669.56	75.0317	1646.4	30.5328			-1.4067	1646.4	30.5328
XOM-BC-007-84	Horse Canyon	Bluecastle T.	4.02452	5.07842	0.288124	1.831	0.101305	4.73686			0.360545		1639.16	41.3084	1632.15	26.4015	1648.16	87.851			0.97114	1648.16	87.851
XOM-BC-007-85	Horse Canyon	Bluecastle T.	4.10502	2.71741	0.293534	1.44436	0.101427	2.30177			0.531521		1655.3	22.1881	1659.17	21.1288	1650.39	42.6723			-0.532112	1650.39	42.6723
BC-07-Spot26	Horse Canyon	Bluecastle T.	4.19068	4.92642	0.299339	4.48274	0.10158	2.04319			0.909939		1672.2	40.3905	1688.03	66.5744	1653.18	37.8643			-2.1084	1653.18	37.8643
BC-07-Spot141	Horse Canyon	Bluecastle T.	4.0849	4.26058	0.291548	3.95414	0.101662	1.58661			0.928075		1651.29	34.7568	1649.26	57.5404	1654.67	29.3963			0.326783	1654.67	29.3963
BC-07-Spot124	Horse Canyon	Bluecastle T.	4.20397	4.783	0.299903	4.35779	0.10171	1.97149			0.911099		1674.79	39.2382	1690.83	64.8124	1655.55	36.5243			-2.1309	1655.55	36.5243
BC-07-Spot142	Horse Canyon	Bluecastle T.	3.89236	4.9704	0.277605	4.66039	0.101736	1.72788			0.93763		1612.1	40.158	1579.29	65.2793	1656.01	32.0086			4.63265	1656.01	32.0086
BC-07-Spot8	Horse Canyon	Bluecastle T.	4.3655	4.35869	0.310369	3.85904	0.102057	2.02633			0.885367		1705.83	36.0127	1742.52	58.9231	1661.85	37.5101			-4.85439	1661.85	37.5101
BC-07-Spot122	Horse Canyon	Bluecastle T.	4.19099	5.76499	0.297701	5.28361	0.102147	2.30621			0.916499		1672.26	47.2687	1679.9	78.1375	1663.47	42.6832			-0.987398	1663.47	42.6832
BC-07-Spot14	Horse Canyon	Bluecastle T.	4.06305	5.31702	0.288481	4.95489	0.102193	1.92867			0.931892		1646.92	43.3316	1633.93	71.5149	1664.32	35.6908			1.82556	1664.32	35.6908
BC-07-Spot75	Horse Canyon	Bluecastle T.	4.11012	4.02864	0.291365	3.65184	0.102354	1.70118			0.906469		1656.32	32.9041	1648.35	53.1155	1667.22	31.4689			1.13211	1667.22	31.4689
BC-07-Spot107	Horse Canyon	Bluecastle T.	4.20545	4.29682	0.297861	4.13875	0.102444	1.15474			0.963212		1675.08	35.2513	1680.69	61.2317	1668.85	21.355			-0.709785	1668.85	21.355
XOM-BC-007-88	Horse Canyon	Bluecastle T.	3.68736	2.74243	0.260801	2.17313	0.102543	1.67285			0.792411		1568.64	21.9063	1493.94	28.978	1670.64	30.9313			10.5767	1670.64	30.9313
BC-07-Spot66	Horse Canyon	Bluecastle T.	4.10422	4.33779	0.28961	4.09277	0.102827	1.43724			0.943515		1655.14	35.4196	1639.58	59.2507	1675.74	26.5569			2.15805	1675.74	26.5569
BC-07-Spot179	Horse Canyon	Bluecastle T.	4.19699	4.63861	0.295982	4.34749	0.102887	1.6174			0.937241		1673.43	38.0412	1671.35	64.0069	1676.83	29.8822			0.326738	1676.83	29.8822
BC-07-Spot193	Horse Canyon	Bluecastle T.	4.35611	5.0918	0.306854	4.75171	0.103004	1.82965			0.93321		1704.06	42.0545	1725.21	71.9246	1678.93	33.7953			-2.75599	1678.93	33.7953
BC-07-Spot145	Horse Canyon	Bluecastle T.	4.45467	4.53471	0.313789	4.18246	0.103007	1.75231			0.922322		1722.57	37.6076	1759.33	64.397	1678.97	32.3664			-4.78573	1678.97	32.3664
XOM-BC-007-98	Horse Canyon	Bluecastle T.	4.25908	14.5511	0.299457	14.4823	0.103153	1.41333			0.995272		1685.49	119.794	1688.61	215.163	1681.59	26.099			-0.417624	1681.59	26.099
BC-07-Spot7	Horse Canyon	Bluecastle T.	4.27173	4.26464	0.299186	3.91457	0.103598	1.69214			0.917912		1687.93	35.0919	1687.27	58.1132	1689.54	31.2129			0.133962	1689.54	31.2129
XOM-BC-007-29	Horse Canyon	Bluecastle T.	3.4153	7.01121	0.23856	6.83444	0.103832	1.56445			0.974788		1507.92	55.0805	1379.21	84.861	1693.7	28.8419			18.5683	1693.7	28.8419
XOM-BC-007-79	Horse Canyon	Bluecastle T.	4.22719	2.34017	0.295214	1.04301	0.103852	2.09488			0.4457		1679.32	19.2164	1667.53	15.3251	1694.05	38.6208			1.56533	1694.05	38.6208
BC-07-Spot201	Horse Canyon	Bluecastle T.	3.54296	8.23841	0.247536	6.369	0.103852	5.22563			0.773086		1536.86	65.2604	1425.76	81.4668	1694.06	96.351			15.8377	1694.06	96.351
XOM-BC-007-105	Horse Canyon	Bluecastle T.	4.55846	13.472	0.318044	13.1269	0.103951	3.02964			0.974386		1741.71	112.297	1780.17	204.209	1695.82	55.8447			-4.97433	1695.82	55.8447
BC-07-Spot97	Horse Canyon	Bluecastle T.	4.21861	5.43227	0.294243	5.11048	0.104028	1.84186			0.940765		1677.65	44.5959	1662.7	74.8988	1697.19	33.9422			2.03223	1697.19	33.9422
BC-07-Spot132	Horse Canyon	Bluecastle T.	4.37436	4.22897	0.304466	3.97074	0.104247	1.45514			0.938937		1707.51	34.9538	1713.41	59.7445	1701.05	26.8015			-0.726641	1701.05	26.8015
XOM-BC-007-18	Horse Canyon	Bluecastle T.	4.41608	7.48861	0.306883	7.45595	0.104367	0.69866			0.995638		1715.36	62.0181	1725.35	112.867	1703.17	12.8629			-1.3022	1703.17	12.8629
BC-07-Spot81	Horse Canyon	Bluecastle T.	4.46131	4.59733	0.309033	4.21182	0.104748	1.84283			0.916145		1723.8	38.1375	1735.94	64.0981	1709.88	33.9056			-1.52446	1709.88	33.9056
BC-07-Spot45	Horse Canyon	Bluecastle T.	4.44186	5.59714	0.307525	5.24414	0.104803	1.95625			0.936933		1720.18	46.3969	1728.52	79.5113	1710.84	35.9883			-1.03327	1710.84	35.9883
XOM-BC-007-4	Horse Canyon	Bluecastle T.	4.51924	4.19184	0.311198	3.3732	0.105324	2.48859			0.804706		1734.52	34.8549	1746.6	51.6098	1719.96	45.7271			-1.54915	1719.96	45.7271
BC-07-Spot87	Horse Canyon	Bluecastle T.	4.45988	5.41119	0.307244	5.06442	0.105324	1.90596			0.935915		1723.54	44.8884	1727.13	76.7326	1719.96	35.023			-0.417018	1719.96	35.023
XOM-BC-007-67	Horse Canyon	Bluecastle T.	3.82118	3.81946	0.263094	3.5808	0.105338	1.32898			0.937513		1597.22	30.7404	1505.65	48.0812	1720.21	24.422			12.4726	1720.21	24.422
XOM-BC-007-61	Horse Canyon	Bluecastle T.	4.2301	9.38256	0.291136	2.9149	0.105379	8.91828			0.310673		1679.88	77.0904	1647.21	42.371	1720.92	163.939			4.28319	1720.92	163.939
BC-07-Spot85	Horse Canyon	Bluecastle T.	4.56239	5.30877	0.312733	4.87727	0.105854	2.09649			0.91872		1742.43	44.2204	1754.14	74.9027	1729.17	38.4798			-1.44396	1729.17	38.4798
BC-07-Spot135	Horse Canyon	Bluecastle T.	4.42036	4.91553	0.302531	4.54575	0.106017	1.87045			0.924773		1716.16	40.7088	1703.85	68.0628	1732.01	34.3183			1.62579	1732.01	34.3183
BC-07-Spot220	Horse Canyon	Bluecastle T.	4.4783	4.6159	0.306153	4.28343	0.106136	1.7201			0.927973		1726.96	38.3182	1721.75	64.7229	1734.06	31.5512			0.710091	1734.06	31.5512
BC-07-Spot82	Horse Canyon	Bluecastle T.	4.53878	4.68541	0.310055	4.42996	0.106216	1.52596			0.945479		1738.11	38.9903	1740.98	67.5882	1735.44	27.9848			-0.319059	1735.44	27.9848
BC-07-Spot147	Horse Canyon	Bluecastle T.	4.76604	4.88735	0.325537	4.64553	0.106229	1.51831			0.950521		1778.94	41.0245	1816.71	73.5474	1735.68	27.8436			-4.66889	1735.68	27.8436
BC-07-Spot128	Horse Canyon	Bluecastle T.	4.67965	4.62411	0.319554	4.16828	0.106257	2.00197			0.901422		1763.61	38.6903	1787.55	65.0723	1736.15	36.7126			-2.96089	1736.15	36.7126
BC-07-Spot150	Horse Canyon	Bluecastle T.	4.45572	4.1586	0.302772	3.71189	0.10678	1.87507			0.89258		1722.76	34.4893	1705.04	55.6113	1745.15	34.3466			2.29827	1745.15	34.3466
XOM-BC-007-37	Horse Canyon	Bluecastle T.	4.77501	6.44124	0.32295	6.38011	0.107235	0.885306			0.99051		1780.51	54.0908	1804.12	100.403	1752.94	16.2023			-2.91973	1752.94	16.2023
BC-07-Spot108	Horse Canyon	Bluecastle T.	4.54719	4.43983	0.30667	3.97376	0.107587	1.98024			0.895025		1739.65	36.9585	1724.3	60.1212	1758.93	36.2111			1.96897	1758.93	36.2111
XOM-BC-007-28	Horse Canyon	Bluecastle T.	4.69598	3.39653	0.316415	3.2191	0.107639	1.08343			0.947761		1766.52	28.4349	1772.2	49.8791	1759.81	19.8112			-0.704133	1759.81	19.8112
BC-07-Spot144	Horse Canyon	Bluecastle T.	4.6875	5.1641	0.314943	4.85618	0.107993	1.75653			0.940374		1765.01	43.2225	1764.98	74.9795	1765.82	32.0921			0.0474325	1765.82	32.0921
BC-07-Spot52	Horse Canyon	Bluecastle T.	4.69402	4.61706	0.314725	4.40937	0.108218	1.36918			0.955018		1766.17	38.6521	1763.92	68.0449	1769.62	25.0025			0.3223	1769.62	25.0025
BC-07-Spot178	Horse Canyon	Bluecastle T.	4.87232	4.78367	0.32666	4.61867	0.108225	1.24553			0.965508		1797.48	40.3064	1822.17	73.3122	1769.73	22.7438			-2.96329	1769.73	22.7438
BC-07-Spot37	Horse Canyon	Bluecastle T.	4.4141	4.71111	0.295875	4.47849	0.108248	1.46209			0.950623		1714.99	39.0052	1670.82	65.9172	1770.13	26.6977			5.61028	1770.13	26.6977
BC-07-Spot13	Horse Canyon	Bluecastle T.	4.99226	5.46384	0.332871	4.92872	0.10882	2.35822			0.902062		1818.01	46.2284	1852.28	79.3498	1779.74	43.0131			-4.07577	1779.74	43.0131
BC-07-Spot104	Horse Canyon	Bluecastle T.	4.65355	4.65283	0.310171	4.30071	0.108861	1.77557			0.924323		1758.93	38.8922	1741.55	65.6351	1780.42	32.3815			2.18316	1780.42	32.3815
BC-07-Spot56	Horse Canyon	Bluecastle T.	4.73839	3.7611	0.315804	3.55995	0.108868	1.21354			0.946517		1774.05	31.537	1769.2	55.0796	1780.54	22.1299			0.636865	1780.54	22.1299
BC-07-Spot148	Horse Canyon	Bluecastle T.	4.83888	5.77958	0.321682	5.28373	0.109146	2.34216			0.914207		1791.68	48.6435	1797.94	82.9019	1785.19	42.6913			-0.714192	1785.19	42.6913
BC-07-Spot35	Horse Canyon	Bluecastle T.	4.2991	3.88446	0.284975	3.66728	0.109461	1.28065			0.944091		1693.19	32.0016	1616.37	52.4296	1790.44	23.3256			9.72209	1790.44	23.3256
BC-07-Spot62	Horse Canyon	Bluecastle T.	4.83419	4.08574	0.319944	3.80508	0.109632	1.48817			0.931307		1790.87	34.3784	1789.45	59.457	1793.29	27.0964			0.213775	1793.29	27.0964
BC-07-Spot68	Horse Canyon	Bluecastle T.	4.85323	4.40697	0.321184	4.19266	0.109639	1.35754			0.951372		1794.17	37.1068	1795.51	65.7056	1793.4	24.721			-0.117347	1793.4	24.721
BC-07-Spot127	Horse Canyon	Bluecastle T.	4.84659	5.65251	0.320267	5.1836	0.109802	2.25414			0.917044		1793.02	47.5866	1791.03	81.0599	1796.11	41.0314			0.283005	1796.11	41.0314
BC-07-Spot83	Horse Canyon	Bluecastle T.	5.07663	5.75073	0.334815	5.46306	0.110017	1.79607			0.949977		1832.21	48.7921	1861.68	88.3376	1799.66	32.6816			-3.44617	1799.66	32.6816
BC-07-Spot57	Horse Canyon	Bluecastle T.	4.8986	4.44531	0.322745	4.18235	0.110129	1.5062			0.940848		1802.02	37.489	1803.12	65.7849	1801.51	27.4007			-0.089147	1801.51	27.4007
BC-07-Spot84	Horse Canyon	Bluecastle T.	4.91083	4.87585	0.323139	4.39561	0.110269	2.11009			0.901508		1804.12	41.1383	1805.04	69.2031	1803.83	38.3725			-0.06708	1803.83	38.3725
BC-07-Spot218	Horse Canyon	Bluecastle T.	4.93552	4.58827	0.322442	4.20254	0.111063	1.84143			0.915931		1808.35	38.7441	1801.64	66.0553	1816.87	33.4328			0.837999	1816.87	33.4328
BC-07-Spot69	Horse Canyon	Bluecastle T.	5.02574	3.57648	0.326938	3.41354	0.111538	1.06722			0.954441		1823.67	30.2906	1823.52	54.2176	1824.61	19.3562			0.0593914	1824.61	19.3562
BC-07-Spot16	Horse Canyon	Bluecastle T.	4.95684	4.63258	0.322127	4.25425	0.111652	1.83361			0.918333		1811.99	39.1467	1800.11	66.819	1826.45	33.2518			1.44237	1826.45	33.2518
XOM-BC-007-43	Horse Canyon	Bluecastle T.	5.09203	4.59079	0.329464	4.03366	0.112094	2.19201			0.878642		1834.78	38.9672	1835.78	64.4395	1833.62	39.7177			-0.117772	1833.62	39.7177
BC-07-Spot157	Horse Canyon	Bluecastle T.	5.19671	4.68678	0.333699	4.39168	0.112996	1.6368			0.937034		1852.08	39.9143	1856.28	70.8354	1848.13	29.604			-0.441292	1848.13	29.604
XOM-BC-007-64	Horse Canyon	Bluecastle T.	4.81834	2.57809	0.30879	2.06599	0.11317	1.54215			0.801365		1788.1	21.6792	1734.75	31.4225	1850.92	27.8824			6.2763	1850.92	27.8824
BC-07-Spot217	Horse Canyon	Bluecastle T.	4.59159	4.76836	0.293585	4.36578	0.113479	1.91761			0.915573		1747.74	39.7633	1659.42	63.8738	1855.85	34.6513			10.5843	1855.85	34.6513
XOM-BC-007-1	Horse Canyon	Bluecastle T.	5.40464	6.80927	0.341965	5.68135	0.114626	3.75346			0.834355		1885.59	58.3609	1896.11	93.3291	1874	67.6814			-1.17997	1874	67.6814
BC-07-Spot213	Horse Canyon	Bluecastle T.	5.31815	4.98357	0.335382	4.71771	0.115056	1.60598			0.946653		1871.78	42.5995	1864.41	76.3815	1880.74	28.9324			0.868317	1880.74	28.9324
BC-07-Spot143	Horse Canyon	Bluecastle T.	5.44556	4.29874	0.343328	4.06674	0.115086	1.39312			0.946031		1892.06	36.8808	1902.66	67.0032	1881.21	25.0956			-1.14017	1881.21	25.0956
XOM-BC-007-32	Horse Canyon	Bluecastle T.	5.427	14.0408	0.33766	11.4038	0.116568	8.19127			0.812191		1889.13	120.526	1875.4	185.58	1904.23	147.221			1.51373	1904.23	147.221
BC-07-Spot2	Horse Canyon	Bluecastle T.	5.43991	5.01725	0.338049	4.77222	0.116762	1.54879			0.951162		1891.17	43.04	1877.28	77.7232	1907.21	27.8177			1.56978	1907.21	27.8177
BC-07-Spot209	Horse Canyon	Bluecastle T.	5.52324	4.75996	0.342229	4.51899	0.117102	1.49531			0.949376		1904.22	40.9282	1897.38	74.277	1912.44	26.8403			0.787484	1912.44	26.8403
XOM-BC-007-8	Horse Canyon	Bluecastle T.	5.65718	2.59003	0.347384	2.50358	0.118111	0.6636			0.96662		1924.86	22.3492	1922.1	41.6102	1927.82	11.8856			0.296652	1927.82	11.8856
BC-07-Spot159	Horse Canyon	Bluecastle T.	5.61682	4.60095	0.341467	4.28685	0.119352	1.67083			0.931731		1918.68	39.6619	1893.72	70.3444	1946.53	29.8703			2.71255	1946.53	29.8703
BC-07-Spot116	Horse Canyon	Bluecastle T.	5.82625	4.32619	0.352997	3.96745	0.119759	1.72489			0.917078		1950.32	37.4966	1948.89	66.728	1952.61	30.8107			0.190198	1952.61	30.8107
BC-07-Spot106	Horse Canyon	Bluecastle T.	5.89692	5.50327	0.346669	5.06174	0.123423	2.15981			0.919769		1960.78	47.786	1918.67	83.9999	2006.28	38.3401			4.36641	2006.28	38.3401
BC-07-Spot139	Horse Canyon	Bluecastle T.	6.72518	4.73812	0.389393	4.47259	0.125315	1.56387			0.94396		2075.94	41.8883	2120.01	80.8065	2033.24	27.6734			-4.26764	2033.24	27.6734
BC-07-Spot43	Horse Canyon	Bluecastle T.	6.4447	4.26995	0.356899	3.80139	0.131022	1.94471			0.890266		2038.38	37.5368	1967.46	64.4558	2111.69	34.1087			6.83014	2111.69	34.1087
BC-07-Spot12	Horse Canyon	Bluecastle T.	6.88633	5.69317	0.368722	5.37102	0.135512	1.88793			0.943415		2096.9	50.4878	2023.38	93.2752	2170.59	32.8964			6.78206	2170.59	32.8964
XOM-BC-007-11	Horse Canyon	Bluecastle T.	8.06927	5.42565	0.412415	5.18385	0.141905	1.6017			0.955433		2238.81	49.0262	2225.95	97.5778	2250.57	27.6657			1.09376	2250.57	27.6657
BC-07-Spot208	Horse Canyon	Bluecastle T.	8.32646	5.56669	0.395645	5.07921	0.152701	2.27808			0.91243		2267.2	50.4731	2148.95	92.8224	2376.39	38.8324			9.57045	2376.39	38.8324
BC-07-Spot64	Horse Canyon	Bluecastle T.	10.3673	5.41729	0.463204	5.13837	0.162398	1.71585			0.948514		2468.13	50.1774	2453.69	104.863	2480.77	28.9374			1.09165	2480.77	28.9374
BC-07-Spot118	Horse Canyon	Bluecastle T.	10.6749	5.80806	0.458008	5.56929	0.169114	1.6482			0.95889		2495.25	53.9354	2430.75	112.783	2548.88	27.6086			4.63446	2548.88	27.6086
BC-07-Spot163	Horse Canyon	Bluecastle T.	11.5386	5.16226	0.490854	4.79024	0.170564	1.92419			0.927935		2567.71	48.2453	2574.37	101.672	2563.17	32.188			-0.436884	2563.17	32.188
BC-07-Spot3	Horse Canyon	Bluecastle T.	11.3602	6.05558	0.479844	5.75661	0.17178	1.87921			0.95063		2553.16	56.5273	2526.59	120.332	2575.05	31.4048			1.88193	2575.05	31.4048
XOM-BC-007-24	Horse Canyon	Bluecastle T.	10.3844	4.55296	0.435621	3.97285	0.17289	2.22395			0.872585		2469.66	42.1753	2331.01	77.7131	2585.81	37.1213			9.85394	2585.81	37.1213
BC-07-Spot166	Horse Canyon	Bluecastle T.	11.6761	4.55318	0.485912	4.28607	0.174353	1.53657			0.941335		2578.79	42.5913	2552.96	90.3543	2599.85	25.6108			1.80358	2599.85	25.6108
BC-07-Spot46	Horse Canyon	Bluecastle T.	12.3657	4.12698	0.503368	3.68407	0.178246	1.86001			0.892678		2632.57	38.7742	2628.25	79.5191	2636.61	30.8937			0.316834	2636.61	30.8937
BC-07-Spot93	Horse Canyon	Bluecastle T.	12.6965	5.3872	0.507326	4.86434	0.181587	2.3152			0.902944		2657.4	50.7175	2645.2	105.544	2667.4	38.3502			0.832271	2667.4	38.3502
BC-07-Spot5	Horse Canyon	Bluecastle T.	11.9431	5.62816	0.476159	5.37104	0.181992	1.68169			0.954316		2599.95	52.7439	2510.52	111.688	2671.1	27.8461			6.01176	2671.1	27.8461
BC-07-Spot185	Horse Canyon	Bluecastle T.	12.5257	3.76754	0.49863	3.33851	0.182269	1.74604			0.886126		2644.66	35.4302	2607.91	71.6077	2673.61	28.9047			2.45759	2673.61	28.9047
XOM-BC-007-30	Horse Canyon	Bluecastle T.	13.296	2.81649	0.522187	2.59596	0.184669	1.09253			0.921699		2700.9	26.5993	2708.45	57.4085	2695.24	18.0432			-0.489888	2695.24	18.0432
BC-07-Spot154	Horse Canyon	Bluecastle T.	13.2593	5.80691	0.515785	5.5035	0.186526	1.85248			0.94775		2698.29	54.8407	2681.28	120.726	2711.75	30.5578			1.12388	2711.75	30.5578
BC-07-Spot25	Horse Canyon	Bluecastle T.	13.5297	4.9868	0.520774	4.64376	0.188507	1.8176			0.93121		2717.36	47.1587	2702.46	102.514	2729.16	29.9269			0.97849	2729.16	29.9269
BC-07-Spot152	Horse Canyon	Bluecastle T.	13.8669	3.64856	0.532327	3.41838	0.189012	1.27542			0.936911		2740.66	34.5583	2751.25	76.5545	2733.57	20.9891			-0.646685	2733.57	20.9891
BC-07-Spot160	Horse Canyon	Bluecastle T.	13.7324	4.84	0.524211	4.63782	0.190077	1.38425			0.958229		2731.43	45.8165	2717.01	102.826	2742.81	22.7615			0.940612	2742.81	22.7615
BC-07-Spot175	Horse Canyon	Bluecastle T.	13.6438	4.10616	0.517647	3.78964	0.191245	1.58088			0.922916		2725.31	38.8508	2689.19	83.3268	2752.89	25.9785			2.31374	2752.89	25.9785
XOM-BC-007-86	Horse Canyon	Bluecastle T.	13.8642	6.56198	0.523345	5.99387	0.192135	2.67079			0.913424		2740.48	62.1661	2713.35	132.749	2760.51	43.8592			1.70823	2760.51	43.8592
XOM-BC-007-13	Horse Canyon	Bluecastle T.	14.1249	6.24491	0.529132	6.20857	0.193607	0.672765			0.99418		2758.13	59.2341	2737.79	138.498	2773.03	11.0346			1.27087	2773.03	11.0346
BC-07-Spot36	Horse Canyon	Bluecastle T.	15.3568	3.61138	0.554131	3.38405	0.201083	1.26106			0.937052		2837.63	34.4308	2842.33	77.7831	2834.99	20.5615			-0.258843	2834.99	20.5615
BC-07-Spot41	Horse Canyon	Bluecastle T.	15.6802	4.95416	0.563798	4.63959	0.201797	1.7372			0.936504		2857.51	47.2965	2882.3	107.833	2840.77	28.3135			-1.46199	2840.77	28.3135
XOM-BC-007-51	Horse Canyon	Bluecastle T.	17.8559	5.34856	0.586626	5.30957	0.220759	0.644626			0.992711		2982	51.4392	2975.73	126.555	2986.23	10.3677			0.351608	2986.23	10.3677
XOM-BC-007-55	Horse Canyon	Bluecastle T.	23.017	6.38907	0.652747	6.37997	0.255743	0.340943			0.998575		3227.66	62.1919	3238.93	162.442	3220.66	5.38354			-0.567294	3220.66	5.38354
BC-8-Spot67	Horse Canyon	U. Castlegate	0.0811788	8.04788	0.0135209	5.63533	0.0435639	5.74555			0.700226		79.2526	6.13561	86.577	4.84629	NA	#VALUE!			-9.24186	86.577	4.84629
XOM-BC-008-97	Horse Canyon	U. Castlegate	0.0908764	8.55679	0.0135231	3.64065	0.0487387	7.74366			0.42547		88.3195	7.23799	86.5913	3.13141	135.303	182.04			1.95674	86.5913	3.13141
XOM-BC-008-36	Horse Canyon	U. Castlegate	0.0792114	64.8349	0.0144033	9.40067	0.0398863	64.1497			0.144994		77.4032	48.3283	92.1874	8.60456	0.0	1695.31			-19.1002	92.1874	8.60456
XOM-BC-008-80	Horse Canyon	U. Castlegate	0.0798375	78.5933	0.0144855	7.82875	0.0399734	78.2024			0.0996109		77.9921	59.0182	92.7098	7.20607	0.0	2087.93			-18.8707	92.7098	7.20607
BC-8-Spot63	Horse Canyon	U. Castlegate	0.0981907	7.46684	0.0145185	6.68325	0.0490724	3.32986			0.895057		95.1048	6.77893	92.9192	6.16548	151.288	78.0598			2.29813	92.9192	6.16548
XOM-BC-008-61	Horse Canyon	U. Castlegate	0.0965341	13.0553	0.0146035	2.90133	0.0479428	12.7289			0.222233		93.572	11.6703	93.4592	2.692	96.4689	301.516			0.12059	93.4592	2.692
XOM-BC-008-47	Horse Canyon	U. Castlegate	0.111111	22.3711	0.014617	9.93814	0.0551311	20.0424			0.44424		106.981	22.7161	93.5454	9.22955	417.521	448.717			12.5589	93.5454	9.22955
XOM-BC-008-35	Horse Canyon	U. Castlegate	0.0949098	14.6757	0.0149276	4.17242	0.0461125	14.0701			0.284308		92.0668	12.9172	95.5186	3.95605	3.50698	339.231			-3.74924	95.5186	3.95605
XOM-BC-008-75	Horse Canyon	U. Castlegate	0.0866489	32.4446	0.015055	6.06596	0.0417429	31.8725			0.186964		84.3769	26.2706	96.3272	5.79973	0.0	809.427			-14.1631	96.3272	5.79973
XOM-BC-008-56	Horse Canyon	U. Castlegate	0.0936323	39.1667	0.0152585	7.06498	0.0445053	38.5242			0.180382		90.8814	34.0519	97.6199	6.84486	0.0	950.773			-7.4146	97.6199	6.84486
BC-8-Spot86	Horse Canyon	U. Castlegate	0.0894977	8.28252	0.0152622	4.70888	0.0425483	6.81371			0.568532		87.0353	6.90843	97.6433	4.56326	NA	#VALUE!			-12.1881	97.6433	4.56326
BC-8-Spot215	Horse Canyon	U. Castlegate	0.10115	4.91231	0.0152824	4.60654	0.0480245	1.70603			0.937755		97.8375	4.5818	97.7715	4.4699	100.486	40.3724			0.0674464	97.7715	4.4699
XOM-BC-008-2	Horse Canyon	U. Castlegate	0.11133	25.8427	0.0154761	12.019	0.0521735	22.8777			0.465084		107.181	26.2883	99.0011	11.8081	293.031	523.86			7.63218	99.0011	11.8081
XOM-BC-008-20	Horse Canyon	U. Castlegate	0.102749	24.6894	0.0155105	6.01876	0.0480452	23.9445			0.243779		99.3105	23.3593	99.2195	5.92606	101.474	567.937			0.0916485	99.2195	5.92606
BC-8-Spot53	Horse Canyon	U. Castlegate	0.101986	7.77092	0.0155478	6.54052	0.0475947	4.19628			0.841666		98.6079	7.30245	99.4565	6.45505	79.1478	99.6625			-0.860588	99.4565	6.45505
BC-8-Spot142	Horse Canyon	U. Castlegate	0.0991939	7.25367	0.0155707	5.08097	0.0462236	5.17683			0.700468		96.0319	6.6466	99.602	5.02185	9.2963	124.567			-3.71753	99.602	5.02185
BC-8-Spot121	Horse Canyon	U. Castlegate	0.0982582	6.32766	0.0156057	4.95405	0.0456848	3.93658			0.78292		95.1672	5.74829	99.8242	4.90725	NA	#VALUE!			-4.89344	99.8242	4.90725
BC-8-Spot130	Horse Canyon	U. Castlegate	0.101934	6.81763	0.0156479	6.00635	0.0472663	3.2255			0.881002		98.5603	6.40368	100.092	5.96543	62.709	76.8206			-1.55398	100.092	5.96543
XOM-BC-008-54	Horse Canyon	U. Castlegate	0.0957028	38.9701	0.0156582	6.12355	0.0443283	38.486			0.157135		92.802	34.5649	100.157	6.08579	0.0	951.6			-7.9259	100.157	6.08579
BC-8-Spot55	Horse Canyon	U. Castlegate	0.103197	6.16341	0.0156715	5.26315	0.0477798	3.20731			0.853935		99.7235	5.8542	100.242	5.23507	88.4056	76.0628			-0.519766	100.242	5.23507
BC-8-Spot89	Horse Canyon	U. Castlegate	0.0999048	5.78328	0.0158614	4.98506	0.0457018	2.93181			0.861978		96.6885	5.3338	101.447	5.01759	NA	#VALUE!			-4.921	101.447	5.01759
XOM-BC-008-5	Horse Canyon	U. Castlegate	0.123873	53.8875	0.0188515	8.58096	0.0476571	53.1999			0.159238		118.577	60.326	120.393	10.235	82.2594	1282.24			-1.53194	120.393	10.235
XOM-BC-008-113	Horse Canyon	U. Castlegate	0.172712	16.5418	0.0247731	5.81173	0.050564	15.4872			0.351337		161.77	24.738	157.752	9.05683	221.011	358.709			2.48404	157.752	9.05683
XOM-BC-008-3	Horse Canyon	U. Castlegate	0.170686	14.9149	0.0247734	6.62568	0.04997	13.3624			0.444232		160.014	22.0813	157.754	10.3254	193.62	310.956			1.41239	157.754	10.3254
BC-8-Spot42	Horse Canyon	U. Castlegate	0.169718	6.53406	0.0248807	6.02624	0.049494	2.52554			0.922281		159.174	9.62636	158.428	9.43091	171.276	58.9553			0.468404	158.428	9.43091
BC-8-Spot60	Horse Canyon	U. Castlegate	0.164763	5.98047	0.0250458	5.41245	0.0477322	2.54388			0.905022		154.864	8.58992	159.467	8.5252	86.0376	60.3679			-2.97261	159.467	8.5252
XOM-BC-008-107	Horse Canyon	U. Castlegate	0.172166	12.05	0.0250673	5.60615	0.0498127	10.6665			0.46524		161.297	17.9716	159.602	8.83766	186.241	248.498			1.05114	159.602	8.83766
XOM-BC-008-28	Horse Canyon	U. Castlegate	0.169151	6.85238	0.0250888	1.88183	0.0488983	6.58892			0.274624		158.682	10.0665	159.737	2.96905	142.967	154.658			-0.665014	159.737	2.96905
BC-8-Spot124	Horse Canyon	U. Castlegate	0.170442	7.95956	0.0251052	7.30302	0.0492607	3.16552			0.917516		159.803	11.7693	159.841	11.5297	160.27	74.0764			-0.0237838	159.841	11.5297
BC-8-Spot144	Horse Canyon	U. Castlegate	0.164053	6.45384	0.0251673	5.57466	0.0472971	3.25195			0.863775		154.244	9.23553	160.231	8.82225	64.2623	77.4322			-3.88118	160.231	8.82225
BC-8-Spot71	Horse Canyon	U. Castlegate	0.167515	7.19905	0.0252192	5.95793	0.0481959	4.04096			0.8276		157.26	10.4882	160.558	9.44777	108.88	95.44			-2.09673	160.558	9.44777
BC-8-Spot38	Horse Canyon	U. Castlegate	0.168732	4.92045	0.02524	4.28895	0.048506	2.41159			0.871658		158.318	7.21305	160.688	6.80663	124.001	56.8099			-1.49706	160.688	6.80663
XOM-BC-008-49	Horse Canyon	U. Castlegate	0.163398	10.1417	0.0252678	4.22698	0.0469003	9.21878			0.416793		153.673	14.4632	160.863	6.71551	44.1466	220.441			-4.67899	160.863	6.71551
XOM-BC-008-112	Horse Canyon	U. Castlegate	0.162259	22.8461	0.0253178	5.3002	0.0464817	22.2228			0.231996		152.679	32.388	161.177	8.4368	22.7016	534.716			-5.56624	161.177	8.4368
BC-8-Spot186	Horse Canyon	U. Castlegate	0.17057	5.63163	0.0253327	5.27432	0.0488549	1.97403			0.936553		159.913	8.33242	161.271	8.40042	140.899	46.3149			-0.848897	161.271	8.40042
XOM-BC-008-38	Horse Canyon	U. Castlegate	0.169946	12.1247	0.0253747	4.12729	0.0485745	11.4006			0.340404		159.372	17.8836	161.535	6.58417	127.364	268.454			-1.35724	161.535	6.58417
BC-8-Spot17	Horse Canyon	U. Castlegate	0.171646	6.00827	0.0254052	5.10715	0.049023	3.16486			0.85002		160.847	8.93758	161.727	8.15688	148.934	74.1672			-0.547096	161.727	8.15688
BC-8-Spot200	Horse Canyon	U. Castlegate	0.170698	5.86438	0.0257309	4.99169	0.048135	3.07797			0.851189		160.024	8.68234	163.774	8.07211	105.885	72.7461			-2.34312	163.774	8.07211
XOM-BC-008-10	Horse Canyon	U. Castlegate	0.252267	12.8312	0.0371675	4.31968	0.0492262	12.0822			0.336655		228.416	26.2473	235.252	9.97894	158.594	282.924			-2.99266	235.252	9.97894
BC-8-Spot77	Horse Canyon	U. Castlegate	0.402857	5.35864	0.0550453	4.94712	0.0531029	2.05939			0.923203		343.718	15.6254	345.423	16.6387	333.201	46.6892			-0.495879	345.423	16.6387
BC-8-Spot216	Horse Canyon	U. Castlegate	0.440548	6.50688	0.0607978	5.77202	0.0525766	3.00387			0.887065		370.638	20.2061	380.475	21.3256	310.549	68.3672			-2.65404	380.475	21.3256
BC-8-Spot209	Horse Canyon	U. Castlegate	0.461501	4.72732	0.0608239	4.39926	0.0550537	1.73036			0.930602		385.301	15.1575	380.634	16.2603	414.381	38.675			1.21133	380.634	16.2603
BC-8-Spot176	Horse Canyon	U. Castlegate	0.471374	5.302	0.0615004	4.54827	0.0556128	2.72478			0.857841		392.137	17.2474	384.744	16.9873	436.921	60.682			1.88534	384.744	16.9873
XOM-BC-008-13	Horse Canyon	U. Castlegate	0.506931	6.448	0.0676861	4.45846	0.0543185	4.65821			0.691448		416.383	22.0256	422.2	18.2205	384.257	104.673			-1.397	422.2	18.2205
BC-8-Spot220	Horse Canyon	U. Castlegate	0.513322	5.4953	0.0679461	4.96623	0.0548167	2.35264			0.903722		420.681	18.9275	423.77	20.3686	404.735	52.6712			-0.734296	423.77	20.3686
[truncated: 7,522 more rows]

## Sheet: DR3. DZ U-Pb Ages - REJECTED
Table DR3. Detrital Zircon U-Pb Ages (Rejected)
			Corrected Ratios										Ages (Ma)
Sample	Location	Formation	207Pb/235U	±2σ (%)	206Pb/238U	±2σ (%)	207Pb/206Pb	±2σ (%)	208Pb/232Th	±2σ (%)	rho		207Pb/235U	±2σ	206Pb/238U	±2σ	207Pb/206Pb	±2σ	208Pb/232Th	±2σ	Disc. %1	Best Age2	±2σ
062114-05_190	Price Canyon	Price River Fm.	0.0904995	74.6488	0.0102338	16.2443	0.0641311	72.8573	0.00415695	43.2686	0.217768		87.9686	62.984	65.6359	10.608	745.957	1539.79	83.8471	36.2368	25.387	65.6359	10.608
062114-05_61	Price Canyon	Price River Fm.	0.0867298	25.952	0.0112968	17.0434	0.0556873	19.5245	0.00414491	19.2088	0.658789		84.4525	21.0334	72.4158	12.2731	439.924	434.353	83.6047	16.0326	14.2526	72.4158	12.2731
062114-05_229	Price Canyon	Price River Fm.	0.278901	45.0969	0.0121412	30.9903	0.166676	32.7459	0.0167091	30.776	0.687566		249.785	100.184	77.796	23.9644	2524.53	549.837	334.937	102.49	68.8549	77.796	23.9644
062114-05_193	Price Canyon	Price River Fm.	0.106078	29.7799	0.0122608	15.2734	0.0627655	25.5536	0.00455718	32.0987	0.513514		102.371	29.0075	78.5574	11.9256	700.294	544.073	91.9015	29.4537	23.2622	78.5574	11.9256
062114-05_90	Price Canyon	Price River Fm.	0.155855	61.59	0.0124599	22.3931	0.0907231	57.3691	0.0038879	47.4954	0.363824		147.068	84.5198	79.8257	17.7652	1440.8	1093.38	78.4308	37.2131	45.722	79.8257	17.7652
062114-05_276	Price Canyon	Price River Fm.	0.133596	82.1932	0.0126016	16.7413	0.076818	80.4658	0.00445344	26.3326	0.203939		127.324	98.6656	80.7278	13.4306	1116.47	1605.74	89.8142	23.6117	36.5966	80.7278	13.4306
062114-05_154	Price Canyon	Price River Fm.	0.285112	67.7726	0.0127548	36.2334	0.162038	57.2769	0.00597903	33.7509	0.534554		254.705	153.838	81.703	29.4171	2477.03	966.362	120.49	40.5862	67.9225	81.703	29.4171
062114-05_26	Price Canyon	Price River Fm.	0.0681066	113.465	0.0127831	18.2435	0.0386454	111.993	0.00385352	36.5301	0.160601		66.9011	73.5915	81.883	14.8439	0.002008	2699.52	77.7386	28.3633	-22.394	81.883	14.8439
062114-05_177	Price Canyon	Price River Fm.	0.13551	24.6806	0.0139286	16.3733	0.0705398	18.44	0.005971	15.8763	0.664663		129.036	29.9151	89.1701	14.4996	944.109	377.753	120.328	19.0559	30.8954	89.1701	14.4996
062114-05_186	Price Canyon	Price River Fm.	0.195354	89.8334	0.0140373	18.155	0.100875	87.9766	0.00424433	14.7549	0.202266		181.188	150.156	89.8611	16.2012	1640.27	1633.49	85.6058	12.6083	50.4044	89.8611	16.2012
062114-05_93	Price Canyon	Price River Fm.	0.463043	103.123	0.0141503	24.1457	0.237367	100.255	0.005951	31.2989	0.234186		386.372	343.979	90.5795	21.7182	3102.4	1597.42	119.926	37.4592	76.5564	90.5795	21.7182
062114-05_192	Price Canyon	Price River Fm.	0.18561	24.6654	0.014491	10.8723	0.0929202	22.1276	0.00892655	26.5191	0.441808		172.877	39.2278	92.7445	10.0113	1486.26	419.154	179.625	47.4795	46.3522	92.7445	10.0113
062114-05_202	Price Canyon	Price River Fm.	0.452619	31.1766	0.014756	12.545	0.222368	28.5231	0.029785	104.315	0.403709		379.112	98.949	94.4282	11.7597	2997.92	458.515	593.229	593.229	75.0922	94.4282	11.7597
062114-05_74	Price Canyon	Price River Fm.	0.13748	84.6459	0.0147823	30.7401	0.0674408	78.8606	0.00941514	67.5182	0.363352		130.797	104.245	94.5953	28.8665	851.417	1639.03	189.411	127.692	27.6779	94.5953	28.8665
062114-05_34	Price Canyon	Price River Fm.	0.106406	22.4316	0.0152149	15.8167	0.0507293	15.9145	0.00478917	19.1275	0.70474		102.672	21.9083	97.3431	15.2808	228.549	367.636	96.5687	18.4355	5.19036	97.3431	15.2808
062114-05_271	Price Canyon	Price River Fm.	0.109584	31.5847	0.0158877	21.7534	0.049984	22.8847	0.00436914	28.0865	0.689224		105.585	31.6838	101.614	21.9312	194.25	531.998	88.1177	24.7104	3.76156	101.614	21.9312
062114-05_84	Price Canyon	Price River Fm.	0.110798	24.3316	0.0163858	16.8547	0.0490314	17.5158	0.00571581	28.5303	0.6941		106.695	24.6479	104.773	17.5166	149.331	410.553	115.2	32.8001	1.80092	104.773	17.5166
062114-05_191	Price Canyon	Price River Fm.	0.187995	50.8002	0.0190374	16.1276	0.0716332	48.1672	0.0113644	22.9416	0.317764		174.917	81.8024	121.569	19.4225	975.539	982.095	228.405	52.1722	30.499	121.569	19.4225
062114-05_60	Price Canyon	Price River Fm.	0.190296	31.5517	0.0233553	21.4276	0.0591087	23.1551	0.00853312	25.3706	0.679279		176.882	51.262	148.827	31.5249	571.101	503.725	171.742	43.4339	15.8608	148.827	31.5249
062114-05_109	Price Canyon	Price River Fm.	0.170831	29.031	0.0245786	19.3344	0.0504141	21.637	0.00929482	22.0556	0.666719		160.14	43.0353	156.528	29.8995	214.133	501.155	187.001	41.0958	2.25572	156.528	29.8995
062114-05_215	Price Canyon	Price River Fm.	0.454605	46.4582	0.0248011	20.5546	0.132974	41.6484	0.0120611	26.7251	0.443103		380.499	148.478	157.928	32.0673	2137.61	728.268	242.324	64.4773	58.4946	157.928	32.0673
062114-05_294	Price Canyon	Price River Fm.	0.438757	22.3849	0.0255296	12.2612	0.124805	18.6965	0.0109007	15.1969	0.549904		369.376	69.4219	162.508	19.6766	2026.03	331.174	219.135	33.1491	56.0045	162.508	19.6766
062114-05_56	Price Canyon	Price River Fm.	0.217402	25.6175	0.0262774	18.5397	0.0600474	17.7465	0.00867505	18.7498	0.721184		199.745	46.4835	167.207	30.6014	605.283	383.843	174.586	32.6199	16.2896	167.207	30.6014
062114-05_102	Price Canyon	Price River Fm.	0.197537	40.8792	0.0270199	29.3642	0.0530246	28.43	0.0096286	29.5224	0.718562		183.04	68.5727	171.87	49.8024	329.852	644.938	193.685	56.9875	6.10245	171.87	49.8024
062114-05_291	Price Canyon	Price River Fm.	0.199063	22.1642	0.0270611	15.6908	0.0533581	15.6335	0.00831148	12.4163	0.70886		184.333	37.3789	172.129	26.6512	344.056	353.747	167.299	20.6973	6.62083	172.129	26.6512
062114-05_54	Price Canyon	Price River Fm.	0.186202	29.6731	0.0275604	21.4816	0.0490373	20.5485	0.00850393	22.7343	0.721428		173.384	47.3298	175.262	37.1423	149.615	481.61	171.157	38.7842	-1.08321	175.262	37.1423
062114-05_284	Price Canyon	Price River Fm.	0.209037	22.3963	0.028028	16.5693	0.0541531	15.0378	0.00896748	7.94844	0.741057		192.744	39.3375	178.194	29.1215	377.421	338.249	180.445	14.2838	7.5487	178.194	29.1215
062114-05_50	Price Canyon	Price River Fm.	0.184499	28.2243	0.0280365	16.771	0.0477245	22.7353	0.00806798	19.7576	0.592569		171.925	44.6677	178.248	29.4846	85.6338	539.242	162.418	31.9865	-3.67776	178.248	29.4846
062114-05_51	Price Canyon	Price River Fm.	0.188138	26.0223	0.0284486	18.2246	0.0479734	18.6304	0.00806534	20.9573	0.698163		175.04	41.8631	180.831	32.4981	97.9565	440.859	162.365	33.9193	-3.3087	180.831	32.4981
062114-05_297	Price Canyon	Price River Fm.	0.845052	78.3428	0.0285943	31.2591	0.21479	71.8178	0.0149288	23.6339	0.399547		621.93	381.305	181.745	56.0197	2942.03	1160.52	299.515	70.3877	70.7773	181.745	56.0197
062114-05_32	Price Canyon	Price River Fm.	0.238047	55.9886	0.0290307	41.0695	0.0594817	38.0579	0.0428549	137.425	0.733449		216.82	109.734	184.479	74.6941	584.772	826.013	848.146	848.146	14.9162	184.479	74.6941
062114-05_87	Price Canyon	Price River Fm.	0.32464	27.888	0.0295599	16.1509	0.0796445	22.7141	0.0132437	21.0545	0.580197		285.466	69.507	187.794	29.893	1188.2	448.52	265.927	55.6996	34.215	187.794	29.893
062114-05_148	Price Canyon	Price River Fm.	0.35695	31.8365	0.0306589	16.6714	0.084435	27.1132	0.00747622	62.1037	0.524128		309.935	85.2348	194.671	31.9695	1302.59	526.685	150.549	93.3645	37.1897	194.671	31.9695
062114-05_96	Price Canyon	Price River Fm.	0.417539	23.8772	0.0307228	21.9232	0.0985809	9.44996	0.00341969	33.9232	0.918348		354.29	71.5309	195.071	42.1257	1597.45	176.424	69.0016	23.3812	44.9404	195.071	42.1257
062114-05_03	Price Canyon	Price River Fm.	0.213877	38.8298	0.0310659	26.9793	0.0499362	27.8723	0.00929972	22.92	0.696243		196.801	69.5766	197.216	52.403	192.026	648.181	187.1	42.7305	-0.21085	197.216	52.403
062114-05_24	Price Canyon	Price River Fm.	0.456048	25.6921	0.0315278	19.7827	0.104915	16.4078	0.017075	19.3173	0.769512		381.506	81.885	200.103	38.9782	1712.83	301.8	342.21	65.6556	47.5492	200.103	38.9782
062114-05_237	Price Canyon	Price River Fm.	1.06811	30.5307	0.0315716	13.8606	0.245491	27.189	0.0198159	20.748	0.454892		737.812	161.453	200.377	27.3464	3155.92	431.477	396.607	81.6509	72.8418	200.377	27.3464
062114-05_175	Price Canyon	Price River Fm.	0.244063	33.3443	0.031606	18.4087	0.0559803	27.785	0.0120644	63.8571	0.552859		221.742	66.5169	200.592	36.3582	451.587	616.861	242.39	154.448	9.53819	200.592	36.3582
062114-05_189	Price Canyon	Price River Fm.	1.2473	23.9542	0.0316403	10.4035	0.285761	21.5676	0.0249086	18.7309	0.435132		822.186	135.8	200.806	20.5688	3394.69	335.845	497.291	92.2204	75.5766	200.806	20.5688
062114-05_38	Price Canyon	Price River Fm.	0.289834	29.4172	0.0326285	21.678	0.0644159	19.8821	0.00696475	21.8817	0.737025		258.429	67.2174	206.978	44.1567	755.317	419.561	140.285	30.6137	19.9091	206.978	44.1567
062114-05_258	Price Canyon	Price River Fm.	0.4548	20.5447	0.0462573	15.1478	0.0713026	13.8491	0.0137729	18.0261	0.738647		380.635	65.305	291.503	43.1735	966.1	282.771	276.482	49.5603	23.4169	291.503	43.1735
062114-05_277	Price Canyon	Price River Fm.	0.371545	25.1721	0.0501487	17.0823	0.0536958	18.4684	0.0217686	35.6954	0.67949		320.798	69.3465	315.435	52.5875	358.311	416.829	435.271	154.299	1.67174	315.435	52.5875
062114-05_201	Price Canyon	Price River Fm.	0.37564	25.0186	0.051847	17.3599	0.0525238	17.9876	0.0303229	31.2669	0.695044		323.825	69.4764	325.851	55.1631	308.281	409.544	603.784	186.854	-0.625722	325.851	55.1631
062114-05_184	Price Canyon	Price River Fm.	0.881292	74.7991	0.054138	47.7452	0.118001	57.5726	0.0134442	19.6792	0.638411		641.68	371.525	339.876	158.103	1926.16	1031.69	269.926	52.8351	47.0334	339.876	158.103
062114-05_124	Price Canyon	Price River Fm.	1.18421	34.1937	0.0565121	20.9022	0.151978	27.0544	0.044688	36.6524	0.611544		793.272	190.442	354.379	72.0767	2368.3	461.638	883.644	319.41	55.327	354.379	72.0767
062114-05_62	Price Canyon	Price River Fm.	0.493643	24.8755	0.0619049	15.2226	0.0578444	19.6176	0.0218513	20.209	0.614875		407.39	83.6661	387.2	57.2082	523.875	430.218	436.907	87.5365	4.95606	387.2	57.2082
062114-05_220	Price Canyon	Price River Fm.	0.731148	11.802	0.0633993	8.34503	0.0836598	8.27017	0.0120511	10.7823	0.713444		557.227	50.6545	396.265	32.0728	1284.65	161.059	242.123	25.9674	28.8862	396.265	32.0728
062114-05_233	Price Canyon	Price River Fm.	0.789433	16.3038	0.0637053	11.844	0.0899182	11.1659	0.0378382	11.2069	0.728674		590.85	73.1594	398.12	45.7277	1423.79	213.297	750.68	82.754	32.619	398.12	45.7277
062114-05_219	Price Canyon	Price River Fm.	0.521996	25.1196	0.0662822	17.3239	0.0571304	18.1553	0.0174642	11.327	0.691107		426.484	87.6948	413.718	69.4234	496.572	400.025	349.944	39.3352	2.99323	413.718	69.4234
062114-05_11	Price Canyon	Price River Fm.	0.590997	23.5979	0.0718453	16.1954	0.0596932	17.0239	0.0194953	15.3374	0.692529		471.504	89.2348	447.264	69.9831	592.473	369.009	390.252	59.3675	5.14111	447.264	69.9831
062114-05_49	Price Canyon	Price River Fm.	0.628338	35.6502	0.0754556	25.1195	0.0603461	25.2975	0.0216294	17.8956	0.7046		495.06	140.573	468.94	113.625	616.007	546.184	432.518	76.7248	5.27604	468.94	113.625
062114-05_162	Price Canyon	Price River Fm.	0.578141	26.4292	0.0758389	18.0962	0.0552476	19.2376	0.0228657	14.4817	0.685694		463.266	98.62	471.237	82.2384	422.255	429.3	456.963	65.5396	-1.7207	471.237	82.2384
062114-05_212	Price Canyon	Price River Fm.	0.902847	24.5793	0.0766512	16.9979	0.0854442	17.7183	0.0159867	32.0617	0.693081		653.248	118.957	476.103	78.0152	1325.64	343.073	320.57	102.228	27.1175	476.103	78.0152
062114-05_262	Price Canyon	Price River Fm.	0.772796	22.7191	0.0804413	15.4279	0.0696676	16.6541	0.0262091	18.9933	0.680179		581.366	100.891	498.756	74.0496	918.573	342.492	522.92	98.2848	14.2096	498.756	74.0496
062114-05_36	Price Canyon	Price River Fm.	0.624269	21.9823	0.0815128	16.1003	0.0555494	14.9699	0.023008	17.5267	0.732287		492.519	85.9911	505.146	78.229	434.403	333.35	459.774	79.8309	-2.56366	505.146	78.229
062114-05_129	Price Canyon	Price River Fm.	2.33939	37.6577	0.081548	20.8521	0.208078	31.3472	0.032607	36.1291	0.554139		1224.34	274.354	505.356	101.361	2890.63	508.747	648.544	231.919	58.7241	505.356	101.361
062114-05_281	Price Canyon	Price River Fm.	1.91465	21.3316	0.0845931	11.3143	0.164363	18.0566	0.0591798	16.2213	0.532438		1086.2	143.227	523.481	56.8887	2501.04	303.906	1162.1	184.026	51.8064	523.481	56.8887
062114-05_98	Price Canyon	Price River Fm.	1.02713	29.5642	0.0852364	16.0941	0.0874069	24.7948	0.0399279	24.2252	0.544628		717.49	153.257	527.303	81.4909	1369.48	477.176	791.336	188.878	26.5072	527.303	81.4909
062114-05_12	Price Canyon	Price River Fm.	0.82958	30.8511	0.0904799	20.1016	0.066532	23.3045	0.0282267	22.0013	0.655291		613.379	142.976	558.375	107.528	823.157	486.505	562.622	122.447	8.96746	558.375	107.528
062114-05_75	Price Canyon	Price River Fm.	1.29422	13.0376	0.0915963	9.40689	0.102449	8.96699	0.0343949	12.6058	0.725933		843.167	74.8145	564.971	50.885	1668.97	165.844	683.509	84.8994	32.9941	564.971	50.885
062114-05_46	Price Canyon	Price River Fm.	0.971367	22.8029	0.0918455	17.198	0.076642	14.9692	0.0254507	16.4123	0.754361		689.168	114.571	566.442	93.2658	1111.89	298.922	507.979	82.5001	17.8078	566.442	93.2658
[truncated: 2,130 more rows]

## Sheet: DR4. Provenance Groups
Table DR4. Compiled Provenance Groups
[truncated: 2,109 more rows]

[truncated: 1 more sheets: DR5. Mixture Modeling Results]
